# Supplementary material for: A cash-based intervention and the risk of acute malnutrition in children aged 6–59 months living in internally displaced persons camps in Mogadishu, Somalia: A non-randomised cluster trial
Source: PLoS Med. 2018 Oct 29;15(10):e1002684. doi: 10.1371/journal.pmed.1002684 (PMC6205571; doi:10.1371/journal.pmed.1002684)
Supplement: S2 Dataset — (XLSX) [file pmed.1002684.s003.xlsx]

## Sheet: Data
cuid	cluster	arm	agem	sex	date0	date1	date2	date3	date4	date5	date6	date7	muac0	muac1	muac2	muac3	muac4	muac5	muac6	muac7	note0	note1	note2	note3	note4	note5	note6	note7
140001	14	0	20	1	2016-03-16	2016-04-19	2016-05-21	2016-06-21	2016-07-23	2016-08-21	2016-09-21	2016-10-22	13.5	12.7	14.3	13.9	14	14.9	15	15.9	90	90	90	90	90	90	90	90
140002	14	0	36	1	2016-03-16	2016-04-19	2016-05-21	2016-06-21	2016-07-23	2016-08-21	2016-09-21	2016-10-22	12.8	12	12.8	12	12.1	12.2	12.5	13	90	90	90	90	90	90	90	90
140003	14	0	12	2	2016-03-16	2016-04-19	2016-05-21	2016-06-21	2016-07-23	2016-08-21	2016-09-21	2016-10-22	13	15.2	13.5	12.8	12.2	12.7	12.2	12.8	90	90	90	90	90	90	90	90
140004	14	0	24	1	2016-03-16	2016-04-19	2016-05-21	2016-06-21	2016-07-23	2016-08-21	2016-09-21	2016-10-22	13.1	13.4	13.5	14.6	13.6	13.6	13	13.7	90	90	90	90	90	90	90	90
140005	14	0	36	1	2016-03-16	2016-04-19	2016-05-21	2016-06-21	2016-07-23	2016-08-21	2016-09-21	2016-10-22	13.5	14	14.3	14	14.2	14.4	14.2	14.6	90	90	90	90	90	90	90	90
140006	14	0	24	2	2016-03-16	2016-04-19	2016-05-21	2016-06-21	2016-07-23	2016-08-21	2016-09-21	2016-10-22	12.5	13	13.4	12.6	13.5	13.3	13.4	13.6	90	90	90	90	90	90	90	90
140007	14	0	8	2	2016-03-16	2016-04-19	2016-05-21	2016-06-21	2016-07-23	2016-08-21	2016-09-21	2016-10-22	11.4	12.5	13.5	12.7	13	12	12.4	13	90	90	90	90	90	90	90	90
140008	14	0	48	2	2016-03-16	2016-04-19	2016-05-21	2016-06-21	2016-07-23	2016-08-21	2016-09-21	2016-10-22	15.6	14.9	14.5	14.8	16	15	15.1	15.8	90	90	90	90	90	90	90	90
140009	14	0	10	1	2016-03-16	2016-04-19	2016-05-21	2016-06-21	2016-07-23	2016-08-21	2016-09-21	2016-10-22	14	13.6	13.3	13.5	14	13.5	12.7	11.5	90	90	90	90	90	90	90	90
140010	14	0	36	1	2016-03-16	2016-04-19	2016-05-21	2016-06-21	2016-07-23	2016-08-21	2016-09-21	2016-10-22	15.6		15.5	15	14.9	15.5	15.4	16	90	94	90	90	90	90	90	90
130011	13	0	12	2	2016-03-16	2016-04-19	2016-05-21	2016-06-21	2016-07-23	2016-08-21	2016-09-21	2016-10-22	13.5	13	13.4	13	13.2	12.7	12.8	13.5	90	90	90	90	90	90	90	90
130012	13	0	30	1	2016-03-16	2016-04-19	2016-05-21	2016-06-21	2016-07-23	2016-08-21	2016-09-21	2016-10-22	13.6	13.4	13.7	14	14.3	15	15.1	15	90	90	90	90	90	90	90	90
130013	13	0	50	1	2016-03-16	2016-04-19	2016-05-21	2016-06-21	2016-07-23	2016-08-21	2016-09-21	2016-10-22	15.4	15.2	15.5	16	15.4	15.4	15.3	15.8	90	90	90	90	90	90	90	90
130014	13	0	18	2	2016-03-16	2016-04-19	2016-05-21	2016-06-21	2016-07-23	2016-08-21	2016-09-21	2016-10-22	14.3	13.1	13.3	13.1	13.4	13.6	14	14.6	90	90	90	90	90	90	90	90
130015	13	0	59	2	2016-03-16	2016-04-19	2016-05-21	2016-06-21	2016-07-23	2016-08-21	2016-09-21	2016-10-22	16.6	16.2	15.6	15.5	15.7	15.9	15.4	15.1	90	90	90	90	90	90	90	90
130016	13	0	7	1	2016-03-16	2016-04-19	2016-05-21	2016-06-21	2016-07-23	2016-08-21	2016-09-21	2016-10-22	12.9	13.6	12.6	14		13.5	13.4		90	90	90	90	91	90	90	92
130017	13	0	48	2	2016-03-16	2016-04-19	2016-05-21	2016-06-21	2016-07-23	2016-08-21	2016-09-21	2016-10-22	15	14.5		14.8	14.9	14.5	14.5		90	90	91	90	90	90	90	92
130018	13	0	6	2	2016-03-16	2016-04-19	2016-05-21	2016-06-21	2016-07-23	2016-08-21	2016-09-21	2016-10-22	15.2	13.7	13.4	13.2	13.2	13.8	12.7	12.4	90	90	90	90	90	90	90	90
130019	13	0	50	1	2016-03-16	2016-04-19	2016-05-21	2016-06-21	2016-07-23	2016-08-21	2016-09-21	2016-10-22	15.5	15	14.2	13.9	14	14.2	14.3		90	90	90	90	90	90	90	93
130020	13	0	36	1	2016-03-16	2016-04-19	2016-05-21	2016-06-21	2016-07-23	2016-08-21	2016-09-21	2016-10-22	16.2	15.3	15.1	16	16.5	15.5	15.6	15.3	90	90	90	90	90	90	90	90
170021	17	0	18	1	2016-03-16	2016-04-19	2016-05-21	2016-06-21	2016-07-23	2016-08-21	2016-09-21	2016-10-22	14.4	14.9	15.3	15.2	15.6	15.5	15.4	15.5	90	90	90	90	90	90	90	90
170022	17	0	36	2	2016-03-16	2016-04-19	2016-05-21	2016-06-21	2016-07-23	2016-08-21	2016-09-21	2016-10-22	14.9	15	15.4	15.6	15.5	15.3	15.2	15	90	90	90	90	90	90	90	90
170023	17	0	24	1	2016-03-16	2016-04-19	2016-05-21	2016-06-21	2016-07-23	2016-08-21	2016-09-21	2016-10-22	12.7	13.1	13.3	13.4	13.7	13.5			90	90	90	90	90	90	93	93
170024	17	0	12	2	2016-03-16	2016-04-19	2016-05-21	2016-06-21	2016-07-23	2016-08-21	2016-09-21	2016-10-22	13.6	14	14.3	14	13.5				90	90	90	90	90	93	93	93
170025	17	0	32	2	2016-03-16	2016-04-19	2016-05-21	2016-06-21	2016-07-23	2016-08-21	2016-09-21	2016-10-22	13.6	13.2	13.4	13.5	13.5	13.2	13.4	12.4	90	90	90	90	90	90	90	90
170026	17	0	8	2	2016-03-16	2016-04-19	2016-05-21	2016-06-21	2016-07-23	2016-08-21	2016-09-21	2016-10-22	14	14.6	14.3	14.5	14.6	14.5	14.7	13.1	90	90	90	90	90	90	90	90
170027	17	0	25	1	2016-03-16	2016-04-19	2016-05-21	2016-06-21	2016-07-23	2016-08-21	2016-09-21	2016-10-22	16.1	16.5	15.5	14.7	14.6	15	15.3	14.8	90	90	90	90	90	90	90	90
170028	17	0	9	1	2016-03-16	2016-04-19	2016-05-21	2016-06-21	2016-07-23	2016-08-21	2016-09-21	2016-10-22	12.9	14.5	14.9	12.5	13.5	13.4	13.6	13.7	90	90	90	90	90	90	90	90
170029	17	0	45	1	2016-03-16	2016-04-19	2016-05-21	2016-06-21	2016-07-23	2016-08-21	2016-09-21	2016-10-22	17.6	18	17.8	18	17.5	17.3	17.4	17.5	90	90	90	90	90	90	90	90
170030	17	0	11	2	2016-03-16	2016-04-19	2016-05-21	2016-06-21	2016-07-23	2016-08-21	2016-09-21	2016-10-22	14.5	14.8	15	14.8	14.7			14.5	90	90	90	90	90	93	93	90
50031	5	1	28	2	2016-03-16	2016-04-19	2016-05-21	2016-06-21	2016-07-23	2016-08-21	2016-09-21	2016-10-22	12.7		14.5		14.7	15.2	15.7	15.4	90	91	90	96	90	90	90	90
50032	5	1	15	1	2016-03-16	2016-04-19	2016-05-21	2016-06-21	2016-07-23	2016-08-21	2016-09-21	2016-10-22	11.5								90	91	96	96	95	95	95	95
50033	5	1	8	2	2016-03-16	2016-04-19	2016-05-21	2016-06-21	2016-07-23	2016-08-21	2016-09-21	2016-10-22	10.9	11.4	11.2	11.4	12.4	12.8		12.8	90	90	90	90	90	90	96	90
50034	5	1	36	2	2016-03-16	2016-04-19	2016-05-21	2016-06-21	2016-07-23	2016-08-21	2016-09-21	2016-10-22	14.3	13.4	14.1			14.9		15.6	90	90	90	91	91	90	96	90
50035	5	1	22	2	2016-03-16	2016-04-19	2016-05-21	2016-06-21	2016-07-23	2016-08-21	2016-09-21	2016-10-22	14.4	14.4	13.9	15.6	14.6	15	14.9		90	90	90	90	90	90	90	93
50036	5	1	36	2	2016-03-16	2016-04-19	2016-05-21	2016-06-21	2016-07-23	2016-08-21	2016-09-21	2016-10-22	14	14.4	13.5			14.8	14.5	14.6	90	90	90	91	94	90	90	90
50037	5	1	24	2	2016-03-16	2016-04-19	2016-05-21	2016-06-21	2016-07-23	2016-08-21	2016-09-21	2016-10-22	14.1								90	92	92	92	92	92	92	92
50038	5	1	59	2	2016-03-16	2016-04-19	2016-05-21	2016-06-21	2016-07-23	2016-08-21	2016-09-21	2016-10-22	15.6								90	92	92	92	92	92	92	92
50039	5	1	18	1	2016-03-16	2016-04-19	2016-05-21	2016-06-21	2016-07-23	2016-08-21	2016-09-21	2016-10-22	15.6								90	92	92	92	92	92	92	92
50040	5	1	51	2	2016-03-16	2016-04-19	2016-05-21	2016-06-21	2016-07-23	2016-08-21	2016-09-21	2016-10-22	15.5	14.5	14.9	14.7	15.1	14.6	15.1	16.4	90	90	90	90	90	90	90	90
120041	12	1	21	2	2016-03-16	2016-04-19	2016-05-21	2016-06-21	2016-07-23	2016-08-21	2016-09-21	2016-10-22	13.7	13.5	13.9	13.3	13.1	14	13.7	14.5	90	90	90	90	90	90	90	90
120042	12	1	47	1	2016-03-16	2016-04-19	2016-05-21	2016-06-21	2016-07-23	2016-08-21	2016-09-21	2016-10-22	14.9	14.7	15	14.5	15	15.1	15	15.2	90	90	90	90	90	90	90	90
120043	12	1	30	2	2016-03-16	2016-04-19	2016-05-21	2016-06-21	2016-07-23	2016-08-21	2016-09-21	2016-10-22	13.2	13.6	13.9	13.6	13.9	14.1	14.4	14.2	90	90	90	90	90	90	90	90
120044	12	1	24	1	2016-03-16	2016-04-19	2016-05-21	2016-06-21	2016-07-23	2016-08-21	2016-09-21	2016-10-22	13.8	13.4	13.5	13.9	13.5	14	14.5	14.8	90	90	90	90	90	90	90	90
120045	12	1	42	1	2016-03-16	2016-04-19	2016-05-21	2016-06-21	2016-07-23	2016-08-21	2016-09-21	2016-10-22	15	14.8	14.5	15.3	15.5	15.6	15.5	15.7	90	90	90	90	90	90	90	90
120046	12	1	18	2	2016-03-16	2016-04-19	2016-05-21	2016-06-21	2016-07-23	2016-08-21	2016-09-21	2016-10-22	13.9	13.2	13	12.3	13.5	13.7	14	13.2	90	90	90	90	90	90	90	90
120047	12	1	36	2	2016-03-16	2016-04-19	2016-05-21	2016-06-21	2016-07-23	2016-08-21	2016-09-21	2016-10-22	14.1	13.6	13.3	12.9	13.4	13.5	14.5	13.5	90	90	90	90	90	90	90	90
120048	12	1	48	2	2016-03-16	2016-04-19	2016-05-21	2016-06-21	2016-07-23	2016-08-21	2016-09-21	2016-10-22	13.6	13.5	13.2	13	12.9	12.5	13	12.9	90	90	90	90	90	90	90	90
120049	12	1	24	2	2016-03-16	2016-04-19	2016-05-21	2016-06-21	2016-07-23	2016-08-21	2016-09-21	2016-10-22	14.4	13.5	14	14.3					90	90	90	90	92	92	92	92
120050	12	1	13.9	2	2016-03-16	2016-04-19	2016-05-21	2016-06-21	2016-07-23	2016-08-21	2016-09-21	2016-10-22	13.9	12.3	12.6	12.6	12	12.5	13	12.7	90	90	90	90	90	90	90	90
40051	4	1	42	1	2016-03-16	2016-04-19	2016-05-21	2016-06-21	2016-07-23	2016-08-21	2016-09-21	2016-10-22	15.7	15.4		15.5					90	90	93	90	93	96	92	92
40052	4	1	12	2	2016-03-16	2016-04-19	2016-05-21	2016-06-21	2016-07-23	2016-08-21	2016-09-21	2016-10-22	12.4	11.3	11.9	11.4	11.9	11.5			90	90	90	90	90	90	92	92
40053	4	1	59	1	2016-03-16	2016-04-19	2016-05-21	2016-06-21	2016-07-23	2016-08-21	2016-09-21	2016-10-22	15	14.7	14.5	14.9	15	15.1	15	14.5	90	90	90	90	90	90	90	90
40054	4	1	30	1	2016-03-16	2016-04-19	2016-05-21	2016-06-21	2016-07-23	2016-08-21	2016-09-21	2016-10-22	13.2	12.7	12.4	12	12.5	12.7	12.9	13	90	90	90	90	90	90	90	90
40055	4	1	24	1	2016-03-16	2016-04-19	2016-05-21	2016-06-21	2016-07-23	2016-08-21	2016-09-21	2016-10-22	13.5	13	12.7	12.9	13	13	13.8	13.4	90	90	90	90	90	90	90	90
40056	4	1	12	1	2016-03-16	2016-04-19	2016-05-21	2016-06-21	2016-07-23	2016-08-21	2016-09-21	2016-10-22	14.4	14.5	14	14	12.9	13.3	12.9	12.4	90	90	90	90	90	90	90	90
40057	4	1	50	2	2016-03-16	2016-04-19	2016-05-21	2016-06-21	2016-07-23	2016-08-21	2016-09-21	2016-10-22	15.3	15.6	15.3	15.6	15.5	15.4	15.2	15.4	90	90	90	90	90	90	90	90
40058	4	1	15	2	2016-03-16	2016-04-19	2016-05-21	2016-06-21	2016-07-23	2016-08-21	2016-09-21	2016-10-22	13.3	13.8	13.9	13.8	14.1	13.8	14	13.6	90	90	90	90	90	90	90	90
40059	4	1	36	1	2016-03-16	2016-04-19	2016-05-21	2016-06-21	2016-07-23	2016-08-21	2016-09-21	2016-10-22	15.8	15.9	15.1	15.3	14.6	15.9	16.1	15.4	90	90	90	90	90	90	90	90
40060	4	1	21	2	2016-03-16	2016-04-19	2016-05-21	2016-06-21	2016-07-23	2016-08-21	2016-09-21	2016-10-22	15.6	15.6	13.9	13.3	13.9	14.1	14	14.2	90	90	90	90	90	90	90	90
140061	14	0	12	1	2016-03-19	2016-04-19	2016-05-21	2016-06-21	2016-07-23	2016-08-21	2016-09-21	2016-10-22	11		11.4	11.2	12.2	12	12.2	12.8	90	94	90	90	90	90	90	90
140062	14	0	30	2	2016-03-19	2016-04-19	2016-05-21	2016-06-21	2016-07-23	2016-08-21	2016-09-21	2016-10-22	13.5	13	13.7	12.9	13.8	13.9	14	14.1	90	90	90	90	90	90	90	90
140063	14	0	48	1	2016-03-19	2016-04-19	2016-05-21	2016-06-21	2016-07-23	2016-08-21	2016-09-21	2016-10-22	13.8	13.9	14	13.2	14	14.2	14.5	14.6	90	90	90	90	90	90	90	90
140064	14	0	36	1	2016-03-19	2016-04-19	2016-05-21	2016-06-21	2016-07-23	2016-08-21	2016-09-21	2016-10-22	13.6	12.6	13	13.3	13.4	13.9	14	14	90	90	90	90	90	90	90	90
140065	14	0	48	1	2016-03-19	2016-04-19	2016-05-21	2016-06-21	2016-07-23	2016-08-21	2016-09-21	2016-10-22	13.9	13.9	14.1	14	14.3	13.6	14	14.6	90	90	90	90	90	90	90	90
140066	14	0	48	1	2016-03-19	2016-04-19	2016-05-21	2016-06-21	2016-07-23	2016-08-21	2016-09-21	2016-10-22	16	15	15.9	15.1	15	14.7	14.1	14.7	90	90	90	90	90	90	90	90
140067	14	0	36	1	2016-03-19	2016-04-19	2016-05-21	2016-06-21	2016-07-23	2016-08-21	2016-09-21	2016-10-22	15	15	15.9	15.7	16	16	15.6	18.4	90	90	90	90	90	90	90	90
140068	14	0	36	1	2016-03-19	2016-04-19	2016-05-21	2016-06-21	2016-07-23	2016-08-21	2016-09-21	2016-10-22	14	13.8	13.3	13.8					90	90	90	90	91	92	92	92
140069	14	0	50	2	2016-03-19	2016-04-19	2016-05-21	2016-06-21	2016-07-23	2016-08-21	2016-09-21	2016-10-22	15.8	17	18	17.5	18	17.6			90	90	90	90	90	90	92	92
140070	14	0	36	2	2016-03-19	2016-04-19	2016-05-21	2016-06-21	2016-07-23	2016-08-21	2016-09-21	2016-10-22	14.5	14	14.1	13.9	14.3	14.5	14.6	14	90	90	90	90	90	90	90	90
140071	14	0	54	2	2016-03-19	2016-04-19	2016-05-21	2016-06-21	2016-07-23	2016-08-21	2016-09-21	2016-10-22	15.4	15.3	15.7	14.8	14.6	15.2	15	15.3	90	90	90	90	90	90	90	90
140072	14	0	36	2	2016-03-19	2016-04-19	2016-05-21	2016-06-21	2016-07-23	2016-08-21	2016-09-21	2016-10-22	13.8	14							90	90	92	92	92	92	92	92
140073	14	0	48	2	2016-03-19	2016-04-19	2016-05-21	2016-06-21	2016-07-23	2016-08-21	2016-09-21	2016-10-22	14.6	14.9							90	90	92	92	92	92	92	92
140074	14	0	48	1	2016-03-19	2016-04-19	2016-05-21	2016-06-21	2016-07-23	2016-08-21	2016-09-21	2016-10-22	14.6	14.9	15.5			15.8	16.1	15.4	90	90	90	91	91	90	90	90
140075	14	0	30	2	2016-03-19	2016-04-19	2016-05-21	2016-06-21	2016-07-23	2016-08-21	2016-09-21	2016-10-22	11.8	11.5	12.5	12.8	13	13	13.4	14	90	90	90	90	90	90	90	90
140076	14	0	22	2	2016-03-19	2016-04-19	2016-05-21	2016-06-21	2016-07-23	2016-08-21	2016-09-21	2016-10-22	12.8	13	13.2	13.5	13.4	13.8	13.4	13	90	90	90	90	90	90	90	90
140077	14	0	36	2	2016-03-19	2016-04-19	2016-05-21	2016-06-21	2016-07-23	2016-08-21	2016-09-21	2016-10-22	14.9	14.7	14.5	14.8	14.6	14.7	15	15.4	90	90	90	90	90	90	90	90
140078	14	0	48	1	2016-03-19	2016-04-19	2016-05-21	2016-06-21	2016-07-23	2016-08-21	2016-09-21	2016-10-22	15.6	15.5	15.7	15.6	15.3	15.5	15.5	15	90	90	90	90	90	90	90	90
140079	14	0	36	2	2016-03-19	2016-04-19	2016-05-21	2016-06-21	2016-07-23	2016-08-21	2016-09-21	2016-10-22	14.4	14.4	12.9	14.1	14.7	14.9	14.8	14.5	90	90	90	90	90	90	90	90
140080	14	0	7	1	2016-03-19	2016-04-19	2016-05-21	2016-06-21	2016-07-23	2016-08-21	2016-09-21	2016-10-22	11.8								90	92	92	92	92	92	92	92
130081	13	0	42	1	2016-03-19	2016-04-19	2016-05-21	2016-06-21	2016-07-23	2016-08-21	2016-09-21	2016-10-22	16	16	16.3	15.9	13.2			15.9	90	90	90	90	90	93	93	90
130082	13	0	16	2	2016-03-19	2016-04-19	2016-05-21	2016-06-21	2016-07-23	2016-08-21	2016-09-21	2016-10-22	13.3	13.9	13.5	13.9	14	14.3	13.3	14.4	90	90	90	90	90	90	90	90
130083	13	0	41	2	2016-03-19	2016-04-19	2016-05-21	2016-06-21	2016-07-23	2016-08-21	2016-09-21	2016-10-22	17.5	17.3	17.2	16	17.5	17.2	17.4	17.2	90	90	90	90	90	90	90	90
130084	13	0	15	1	2016-03-19	2016-04-19	2016-05-21	2016-06-21	2016-07-23	2016-08-21	2016-09-21	2016-10-22	13.5	13.5	13.2	13.3	12.9	12.6	12.5	13.4	90	90	90	90	90	90	90	90
130085	13	0	27	2	2016-03-19	2016-04-19	2016-05-21	2016-06-21	2016-07-23	2016-08-21	2016-09-21	2016-10-22	15.8	16	15.7	15.8	16.5	15.8	16.2	16.4	90	90	90	90	90	90	90	90
130086	13	0	30	1	2016-03-19	2016-04-19	2016-05-21	2016-06-21	2016-07-23	2016-08-21	2016-09-21	2016-10-22	14.6	13.4	13.1	13.8	13.2	14	14.1	15	90	90	90	90	90	90	90	90
130087	13	0	21	1	2016-03-19	2016-04-19	2016-05-21	2016-06-21	2016-07-23	2016-08-21	2016-09-21	2016-10-22	12.1	10.2	12.2		11.6			13.8	90	90	90	91	90	93	93	90
130088	13	0	55	1	2016-03-19	2016-04-19	2016-05-21	2016-06-21	2016-07-23	2016-08-21	2016-09-21	2016-10-22	13.1	12.8	12.5	13.4	13.9			13.6	90	90	90	90	90	93	93	90
130089	13	0	52	1	2016-03-19	2016-04-19	2016-05-21	2016-06-21	2016-07-23	2016-08-21	2016-09-21	2016-10-22	12.1	12.3	12.2	12.4	12.2	12.7			90	90	90	90	90	90	92	92
130090	13	0	52	2	2016-03-19	2016-04-19	2016-05-21	2016-06-21	2016-07-23	2016-08-21	2016-09-21	2016-10-22	12.9	12.9	12.7	13	13	12.4			90	90	90	90	90	90	92	92
130091	13	0	7	1	2016-03-19	2016-04-19	2016-05-21	2016-06-21	2016-07-23	2016-08-21	2016-09-21	2016-10-22	11.9	10.9	10.5		11.3	10.9			90	90	90	91	90	90	92	92
130092	13	0	46	1	2016-03-19	2016-04-19	2016-05-21	2016-06-21	2016-07-23	2016-08-21	2016-09-21	2016-10-22	14.5	12.5	12.2	11.5	12.5				90	90	90	90	90	94	93	94
130093	13	0	25	1	2016-03-19	2016-04-19	2016-05-21	2016-06-21	2016-07-23	2016-08-21	2016-09-21	2016-10-22	13.5	13.5	13.9	14	14.8	14.8	14.5	15.5	90	90	90	90	90	90	90	90
130094	13	0	36	1	2016-03-19	2016-04-19	2016-05-21	2016-06-21	2016-07-23	2016-08-21	2016-09-21	2016-10-22	15.7	15.5	15.3	15.8	15.1	15	14.9	15.2	90	90	90	90	90	90	90	90
130095	13	0	10	1	2016-03-19	2016-04-19	2016-05-21	2016-06-21	2016-07-23	2016-08-21	2016-09-21	2016-10-22	13.2	12.7	12.3	12.1	12.7	12.9	13.1	13.2	90	90	90	90	90	90	90	90
130096	13	0	34	2	2016-03-19	2016-04-19	2016-05-21	2016-06-21	2016-07-23	2016-08-21	2016-09-21	2016-10-22	14	13.2	13.2	13	13.2	13.5	14	13.7	90	90	90	90	90	90	90	90
130097	13	0	57	2	2016-03-19	2016-04-19	2016-05-21	2016-06-21	2016-07-23	2016-08-21	2016-09-21	2016-10-22	14.5	13.9	13.7	14.5	14	13.7	14.1	13.9	90	90	90	90	90	90	90	90
130098	13	0	49	2	2016-03-19	2016-04-19	2016-05-21	2016-06-21	2016-07-23	2016-08-21	2016-09-21	2016-10-22	14.2	13.2	13.1	13.4	13.9	13.3	13.9	14.1	90	90	90	90	90	90	90	90
130099	13	0	28	1	2016-03-19	2016-04-19	2016-05-21	2016-06-21	2016-07-23	2016-08-21	2016-09-21	2016-10-22	14.5	14	14.1	13.6	13.2	13.1	13.7	14.3	90	90	90	90	90	90	90	90
130100	13	0	7	1	2016-03-19	2016-04-19	2016-05-21	2016-06-21	2016-07-23	2016-08-21	2016-09-21	2016-10-22	13.5	12			12.5	13.2	13.1	12.9	90	90	91	91	90	90	90	90
170101	17	0	11	1	2016-03-19	2016-04-19	2016-05-21	2016-06-21	2016-07-23	2016-08-21	2016-09-21	2016-10-22	14.4	15.4	15.7	15.5	15.6	15.1	15	15.1	90	90	90	90	90	90	90	90
170102	17	0	35	1	2016-03-19	2016-04-19	2016-05-21	2016-06-21	2016-07-23	2016-08-21	2016-09-21	2016-10-22	15.1	15.5							90	90	93	93	93	93	93	93
170103	17	0	48	2	2016-03-19	2016-04-19	2016-05-21	2016-06-21	2016-07-23	2016-08-21	2016-09-21	2016-10-22	19.6	17.7	17.5	17.4	17.6	17.5	16.8	17	90	90	90	90	90	90	90	90
170104	17	0	8	2	2016-03-19	2016-04-19	2016-05-21	2016-06-21	2016-07-23	2016-08-21	2016-09-21	2016-10-22	11.3	11.8	12.4	12.6		12.7			90	90	90	90	93	90	93	96
170105	17	0	14	2	2016-03-19	2016-04-19	2016-05-21	2016-06-21	2016-07-23	2016-08-21	2016-09-21	2016-10-22	14.3	14.5	14.8	14.9					90	90	90	90	95	95	95	95
170106	17	0	36	2	2016-03-19	2016-04-19	2016-05-21	2016-06-21	2016-07-23	2016-08-21	2016-09-21	2016-10-22	18.2	14.9							90	90	93	93	93	93	93	96
170107	17	0	42	1	2016-03-19	2016-04-19	2016-05-21	2016-06-21	2016-07-23	2016-08-21	2016-09-21	2016-10-22	14.7	14.6	14.4	15	14.7	14.5	14.6	14.5	90	90	90	90	90	90	90	90
170108	17	0	21	2	2016-03-19	2016-04-19	2016-05-21	2016-06-21	2016-07-23	2016-08-21	2016-09-21	2016-10-22	14.3	14.9		15	14.8	14.6	14.5	14.6	90	90	93	90	90	90	90	90
170109	17	0	46	1	2016-03-19	2016-04-19	2016-05-21	2016-06-21	2016-07-23	2016-08-21	2016-09-21	2016-10-22	13	13.5	13.3	13.1					90	90	90	90	93	93	92	92
170110	17	0	56	1	2016-03-19	2016-04-19	2016-05-21	2016-06-21	2016-07-23	2016-08-21	2016-09-21	2016-10-22	15.2	15.4	15.4	15.5					90	90	90	90	93	93	92	92
170111	17	0	18	2	2016-03-19	2016-04-19	2016-05-21	2016-06-21	2016-07-23	2016-08-21	2016-09-21	2016-10-22	15.3								90	92	92	92	92	92	92	92
170112	17	0	11	2	2016-03-19	2016-04-19	2016-05-21	2016-06-21	2016-07-23	2016-08-21	2016-09-21	2016-10-22	13.8	14.3		15		15.2			90	90	91	90	91	90	93	92
170113	17	0	30	1	2016-03-19	2016-04-19	2016-05-21	2016-06-21	2016-07-23	2016-08-21	2016-09-21	2016-10-22	16.8	15.9	15.5	16.7	16.4	16.2	16.6	17.2	90	90	90	90	90	90	90	90
170114	17	0	36	1	2016-03-19	2016-04-19	2016-05-21	2016-06-21	2016-07-23	2016-08-21	2016-09-21	2016-10-22	14.6	15	14.9	15.2	15.4	15.5	15.1	14.8	90	90	90	90	90	90	90	90
170115	17	0	8	2	2016-03-19	2016-04-19	2016-05-21	2016-06-21	2016-07-23	2016-08-21	2016-09-21	2016-10-22	14	15	14.8	14.3	14.2	14.6	14.4	14.2	90	90	90	90	90	90	90	90
170116	17	0	15	2	2016-03-19	2016-04-19	2016-05-21	2016-06-21	2016-07-23	2016-08-21	2016-09-21	2016-10-22	15.7		16.2	15.3	15.7	15.5	15.8	16.1	90	96	90	90	90	90	90	90
170117	17	0	22	1	2016-03-19	2016-04-19	2016-05-21	2016-06-21	2016-07-23	2016-08-21	2016-09-21	2016-10-22	13.3	14	12.9	12.3	13	13.6	13.5	13.4	90	90	90	90	90	90	90	90
170118	17	0	8	1	2016-03-19	2016-04-19	2016-05-21	2016-06-21	2016-07-23	2016-08-21	2016-09-21	2016-10-22	14.6	14.7	14.3	14.4	14.3	14.5	14.9	14.4	90	90	90	90	90	90	90	90
170119	17	0	20	1	2016-03-19	2016-04-19	2016-05-21	2016-06-21	2016-07-23	2016-08-21	2016-09-21	2016-10-22	14.6	14.6	14.4	14.6	14.4	14.6	14.5		90	90	90	90	90	90	90	93
170120	17	0	18	1	2016-03-19	2016-04-19	2016-05-21	2016-06-21	2016-07-23	2016-08-21	2016-09-21	2016-10-22	12.6	13	12.5	12.4	12.5	12.3	12.5	13.1	90	90	90	90	90	90	90	90
40121	4	1	39	2	2016-03-19	2016-04-19	2016-05-21	2016-06-21	2016-07-23	2016-08-21	2016-09-21	2016-10-22	15.9	15.5	16.1	14.9	14.9	14.8	15	15	90	90	90	90	90	90	90	90
40122	4	1	48	2	2016-03-19	2016-04-19	2016-05-21	2016-06-21	2016-07-23	2016-08-21	2016-09-21	2016-10-22	14.2	14.1	13.8	13.8	14.5	14.2	14.5	14	90	90	90	90	90	90	90	90
40123	4	1	16	1	2016-03-19	2016-04-19	2016-05-21	2016-06-21	2016-07-23	2016-08-21	2016-09-21	2016-10-22	14.8	14.8	14.3	13.8	13.8	13.9	13.8	14.1	90	90	90	90	90	90	90	90
40124	4	1	30	2	2016-03-19	2016-04-19	2016-05-21	2016-06-21	2016-07-23	2016-08-21	2016-09-21	2016-10-22	16.1	16	14.4	15.2	15.1	15.5	15.3	15.8	90	90	90	90	90	90	90	90
40125	4	1	8	1	2016-03-19	2016-04-19	2016-05-21	2016-06-21	2016-07-23	2016-08-21	2016-09-21	2016-10-22	12.1	11.6		12.1	13.3	13	12.8	12.4	90	90	94	90	90	90	90	90
40126	4	1	22	1	2016-03-19	2016-04-19	2016-05-21	2016-06-21	2016-07-23	2016-08-21	2016-09-21	2016-10-22	14.1	13.1	13.5	13	13.5		14	14.1	90	90	90	90	90	93	90	90
40127	4	1	52	1	2016-03-19	2016-04-19	2016-05-21	2016-06-21	2016-07-23	2016-08-21	2016-09-21	2016-10-22	15.2	17.4	14.5		13.8				90	90	90	94	90	93	93	93
40128	4	1	7	2	2016-03-19	2016-04-19	2016-05-21	2016-06-21	2016-07-23	2016-08-21	2016-09-21	2016-10-22	12.4	13	12.7	11.9	11.9	13	12.8		90	90	90	90	90	90	90	93
40129	4	1	42	2	2016-03-19	2016-04-19	2016-05-21	2016-06-21	2016-07-23	2016-08-21	2016-09-21	2016-10-22	14.7	15.1		14.8		14.5	14.6	14.4	90	90	91	90	91	90	90	90
40130	4	1	48	2	2016-03-19	2016-04-19	2016-05-21	2016-06-21	2016-07-23	2016-08-21	2016-09-21	2016-10-22	14.5	14.5	14.4	14.1	14	14.4	14	13.4	90	90	90	90	90	90	90	90
40131	4	1	48	1	2016-03-19	2016-04-19	2016-05-21	2016-06-21	2016-07-23	2016-08-21	2016-09-21	2016-10-22	13.4	13.2	14.3	13.7	14.1	13.5	13.7	13.3	90	90	90	90	90	90	90	90
40132	4	1	30	2	2016-03-19	2016-04-19	2016-05-21	2016-06-21	2016-07-23	2016-08-21	2016-09-21	2016-10-22	12.9	13	13.3	13.1	13.3	13	13.4	12.9	90	90	90	90	90	90	90	90
40133	4	1	8	1	2016-03-19	2016-04-19	2016-05-21	2016-06-21	2016-07-23	2016-08-21	2016-09-21	2016-10-22	10.2	10.2	10.3	10	9.7	10.6	11	11.6	90	90	90	90	90	90	90	90
40134	4	1	50	2	2016-03-19	2016-04-19	2016-05-21	2016-06-21	2016-07-23	2016-08-21	2016-09-21	2016-10-22	14.9	14.5	14.3	14.5	14.7	14.9	14.8	14.3	90	90	90	90	90	90	90	90
40135	4	1	24	2	2016-03-19	2016-04-19	2016-05-21	2016-06-21	2016-07-23	2016-08-21	2016-09-21	2016-10-22	12.7	10.7	11.1	10.9	10.9	11.6	12.5	12	90	90	90	90	90	90	90	90
40136	4	1	24	2	2016-03-19	2016-04-19	2016-05-21	2016-06-21	2016-07-23	2016-08-21	2016-09-21	2016-10-22	15.3	14.8	15.6	15.2	14.9	14.5	14.9	15	90	90	90	90	90	90	90	90
40137	4	1	24	2	2016-03-19	2016-04-19	2016-05-21	2016-06-21	2016-07-23	2016-08-21	2016-09-21	2016-10-22	16.4	16.5	16.6	16.5	16.3	16.4	15.9	14.6	90	90	90	90	90	90	90	90
40138	4	1	42	2	2016-03-19	2016-04-19	2016-05-21	2016-06-21	2016-07-23	2016-08-21	2016-09-21	2016-10-22	15.5	15.2	15.1	15	14.6	14.3	14.2	13.4	90	90	90	90	90	90	90	90
40139	4	1	36	2	2016-03-19	2016-04-19	2016-05-21	2016-06-21	2016-07-23	2016-08-21	2016-09-21	2016-10-22	14.7	15.2	14.5						90	90	90	91	91	92	92	92
40140	4	1	17	2	2016-03-19	2016-04-19	2016-05-21	2016-06-21	2016-07-23	2016-08-21	2016-09-21	2016-10-22	13.6	13.7	13.7	13	13.3	13.4	13.6	13	90	90	90	90	90	90	90	90
120141	12	1	42	1	2016-03-19	2016-04-19	2016-05-21	2016-06-21	2016-07-23	2016-08-21	2016-09-21	2016-10-22	16.2	17.4	15.9	16	16.3	16	16	15.7	90	90	90	90	90	90	90	90
120142	12	1	36	1	2016-03-19	2016-04-19	2016-05-21	2016-06-21	2016-07-23	2016-08-21	2016-09-21	2016-10-22	15.1	15.2	14.6	14.7	15	14.5	15	14.9	90	90	90	90	90	90	90	90
120143	12	1	24	1	2016-03-19	2016-04-19	2016-05-21	2016-06-21	2016-07-23	2016-08-21	2016-09-21	2016-10-22	12.5	13.2	13.2	13.6	13.3	12.8	14.5	13.9	90	90	90	90	90	90	90	90
120144	12	1	18	1	2016-03-19	2016-04-19	2016-05-21	2016-06-21	2016-07-23	2016-08-21	2016-09-21	2016-10-22	12.2	12.5	12	12.1	12.1	13.8	13.4	13.2	90	90	90	90	90	90	90	90
120145	12	1	7	2	2016-03-19	2016-04-19	2016-05-21	2016-06-21	2016-07-23	2016-08-21	2016-09-21	2016-10-22	10.6	10.5	11.1	11	12.5	12	12.1	13.2	90	90	90	90	90	90	90	90
120146	12	1	20	1	2016-03-19	2016-04-19	2016-05-21	2016-06-21	2016-07-23	2016-08-21	2016-09-21	2016-10-22	14.4	14.2	14	14.4	14.6	14.5	15.2		90	90	90	90	90	90	90	93
120147	12	1	42	2	2016-03-19	2016-04-19	2016-05-21	2016-06-21	2016-07-23	2016-08-21	2016-09-21	2016-10-22	15.2	14.1	13.4	13.7	14.2	13.9	14.4		90	90	90	90	90	90	90	93
120148	12	1	30	2	2016-03-19	2016-04-19	2016-05-21	2016-06-21	2016-07-23	2016-08-21	2016-09-21	2016-10-22	13.2	13.9	13.5	13.5	14.6	14.2	14.1	14.5	90	90	90	90	90	90	90	90
120149	12	1	18	1	2016-03-19	2016-04-19	2016-05-21	2016-06-21	2016-07-23	2016-08-21	2016-09-21	2016-10-22	12.5	12.3	11.5	12.5	13.4	13.5	13.8	14	90	90	90	90	90	90	90	90
120150	12	1	48	2	2016-03-19	2016-04-19	2016-05-21	2016-06-21	2016-07-23	2016-08-21	2016-09-21	2016-10-22	12.6	14.5	14.8	15.3	15.5	15	14.5	15	90	90	90	90	90	90	90	90
120151	12	1	8	1	2016-03-19	2016-04-19	2016-05-21	2016-06-21	2016-07-23	2016-08-21	2016-09-21	2016-10-22	15.1	12.5	11.6						90	90	90	91	95	95	95	95
120152	12	1	48	2	2016-03-19	2016-04-19	2016-05-21	2016-06-21	2016-07-23	2016-08-21	2016-09-21	2016-10-22	13.5	13.6	13.4	14	14.5	13.9	14	13.6	90	90	90	90	90	90	90	90
120153	12	1	24	1	2016-03-19	2016-04-19	2016-05-21	2016-06-21	2016-07-23	2016-08-21	2016-09-21	2016-10-22	13.2	13.1	13	13.4	13.5	14.3		13.5	90	90	90	90	90	90	93	90
120154	12	1	54	1	2016-03-19	2016-04-19	2016-05-21	2016-06-21	2016-07-23	2016-08-21	2016-09-21	2016-10-22	16	16.6	16.3	15.6	16.3	16			90	90	90	90	90	90	93	93
120155	12	1	48	1	2016-03-19	2016-04-19	2016-05-21	2016-06-21	2016-07-23	2016-08-21	2016-09-21	2016-10-22	14.7	14.7	14.5	14.6	15.1	15	15.2	15.1	90	90	90	90	90	90	90	90
120156	12	1	36	2	2016-03-19	2016-04-19	2016-05-21	2016-06-21	2016-07-23	2016-08-21	2016-09-21	2016-10-22	15	14.5	14.4	14.6	15	14.5	14.3	14.5	90	90	90	90	90	90	90	90
120157	12	1	48	2	2016-03-19	2016-04-19	2016-05-21	2016-06-21	2016-07-23	2016-08-21	2016-09-21	2016-10-22	13.8	15.5	13.5	13.5	14	13.5	14.2	14.4	90	90	90	90	90	90	90	90
120158	12	1	48	1	2016-03-19	2016-04-19	2016-05-21	2016-06-21	2016-07-23	2016-08-21	2016-09-21	2016-10-22	13.5	13.4	13.7	14.3	13.6	14	14.2	13.7	90	90	90	90	90	90	90	90
120159	12	1	18	1	2016-03-19	2016-04-19	2016-05-21	2016-06-21	2016-07-23	2016-08-21	2016-09-21	2016-10-22	13.4	13.5	12.3	12.2	12.9	13	13.5	13.7	90	90	90	90	90	90	90	90
120160	12	1	14	2	2016-03-19	2016-04-19	2016-05-21	2016-06-21	2016-07-23	2016-08-21	2016-09-21	2016-10-22	13.9	11.5	11.5						90	90	90	91	92	92	92	92
50161	5	1	9	2	2016-03-19	2016-04-19	2016-05-21	2016-06-21	2016-07-23	2016-08-21	2016-09-21	2016-10-22	11.6	11.6	11.3	11.5	13.6	13.6	13.3	14.9	90	90	90	90	90	90	90	90
50162	5	1	22	2	2016-03-19	2016-04-19	2016-05-21	2016-06-21	2016-07-23	2016-08-21	2016-09-21	2016-10-22	13.8	13.9	13.4	14.1	14.3	14.5	14.1	14.5	90	90	90	90	90	90	90	90
50163	5	1	19	2	2016-03-19	2016-04-19	2016-05-21	2016-06-21	2016-07-23	2016-08-21	2016-09-21	2016-10-22	13.9	14.6	14.2	14.4	15.2	15	15.2	15.1	90	90	90	90	90	90	90	90
50164	5	1	32	2	2016-03-19	2016-04-19	2016-05-21	2016-06-21	2016-07-23	2016-08-21	2016-09-21	2016-10-22	15.5	15.1	15.4	15.9	15.4	15.7	15.9	15.6	90	90	90	90	90	90	90	90
50165	5	1	48	1	2016-03-19	2016-04-19	2016-05-21	2016-06-21	2016-07-23	2016-08-21	2016-09-21	2016-10-22	16.7	17.7	16.4	16.9	16.2	16.8	16.8	17.5	90	90	90	90	90	90	90	90
50166	5	1	19	2	2016-03-19	2016-04-19	2016-05-21	2016-06-21	2016-07-23	2016-08-21	2016-09-21	2016-10-22	13.9	13.6	12.7	12.4	12.6	12	13.6	12.9	90	90	90	90	90	90	90	90
50167	5	1	49	1	2016-03-19	2016-04-19	2016-05-21	2016-06-21	2016-07-23	2016-08-21	2016-09-21	2016-10-22	16	17.1	16	16.6	16.6	17	16.8	17.4	90	90	90	90	90	90	90	90
50168	5	1	15	1	2016-03-19	2016-04-19	2016-05-21	2016-06-21	2016-07-23	2016-08-21	2016-09-21	2016-10-22	14		14.2	14.8	15.6	15	15.6	14.7	90	91	90	90	90	90	90	90
50169	5	1	39	1	2016-03-19	2016-04-19	2016-05-21	2016-06-21	2016-07-23	2016-08-21	2016-09-21	2016-10-22	15.2	14.7	15.2	15.1	15.6	15.6	15.2	16.1	90	90	90	90	90	90	90	90
50170	5	1	51	1	2016-03-19	2016-04-19	2016-05-21	2016-06-21	2016-07-23	2016-08-21	2016-09-21	2016-10-22	14.2	14.4	14.6	14.7	15	14.9	14.8	15.1	90	90	90	90	90	90	90	90
50171	5	1	24	2	2016-03-19	2016-04-19	2016-05-21	2016-06-21	2016-07-23	2016-08-21	2016-09-21	2016-10-22	14.3	14.3	14.6	14.7	14.8	15.1			90	90	90	90	90	90	93	93
50172	5	1	33	1	2016-03-19	2016-04-19	2016-05-21	2016-06-21	2016-07-23	2016-08-21	2016-09-21	2016-10-22	14.9	15.5	15.7	16.1	15.7	15.6	15.8	15.7	90	90	90	90	90	90	90	90
50173	5	1	23	2	2016-03-19	2016-04-19	2016-05-21	2016-06-21	2016-07-23	2016-08-21	2016-09-21	2016-10-22	15.2	14.6	14.4	14.7	15.2	14.6	15.4	15.1	90	90	90	90	90	90	90	90
50174	5	1	38	2	2016-03-19	2016-04-19	2016-05-21	2016-06-21	2016-07-23	2016-08-21	2016-09-21	2016-10-22	16.3	16.1	16.1	16.1	16.8	16	16.2	15.8	90	90	90	90	90	90	90	90
50175	5	1	25	1	2016-03-19	2016-04-19	2016-05-21	2016-06-21	2016-07-23	2016-08-21	2016-09-21	2016-10-22	14.8								90	92	92	92	92	92	92	92
50176	5	1	42	2	2016-03-19	2016-04-19	2016-05-21	2016-06-21	2016-07-23	2016-08-21	2016-09-21	2016-10-22	16.2								90	92	92	92	92	92	92	92
50177	5	1	12	2	2016-03-19	2016-04-19	2016-05-21	2016-06-21	2016-07-23	2016-08-21	2016-09-21	2016-10-22	13.4	13.2	13.7	14.7	14.6	14.6	14.6	14.6	90	90	90	90	90	90	90	90
50178	5	1	35	1	2016-03-19	2016-04-19	2016-05-21	2016-06-21	2016-07-23	2016-08-21	2016-09-21	2016-10-22	14.7	14.8	14.7	15.6	15.4	16.1	16.2	16.5	90	90	90	90	90	90	90	90
50179	5	1	50	2	2016-03-19	2016-04-19	2016-05-21	2016-06-21	2016-07-23	2016-08-21	2016-09-21	2016-10-22	14.9	14.9	14.6	15.3	15.7	15.1	15.2	15.4	90	90	90	90	90	90	90	90
50180	5	1	42	1	2016-03-19	2016-04-19	2016-05-21	2016-06-21	2016-07-23	2016-08-21	2016-09-21	2016-10-22	14.2	14.7	14.4	15.2	14.2	13.1		14.8	90	90	90	90	90	90	93	90
140181	14	0	12	2	2016-03-20	2016-04-20	2016-05-22	2016-06-22	2016-07-24	2016-08-22	2016-09-24	2016-10-23	14								90	92	92	92	92	92	92	92
140182	14	0	14	2	2016-03-20	2016-04-20	2016-05-22	2016-06-22	2016-07-24	2016-08-22	2016-09-24	2016-10-23	12.9	12	13.4	12.1	12.5	12.1	10.1	10.6	90	90	90	90	90	90	90	90
140183	14	0	48	1	2016-03-20	2016-04-20	2016-05-22	2016-06-22	2016-07-24	2016-08-22	2016-09-24	2016-10-23	13.6	13.7	14.8	13.5		14.5	15	15.4	90	90	90	90	91	90	90	90
140184	14	0	9	2	2016-03-20	2016-04-20	2016-05-22	2016-06-22	2016-07-24	2016-08-22	2016-09-24	2016-10-23	11.8	13	13.4	13.1	13.2	13.5	13.3	14.2	90	90	90	90	90	90	90	90
140185	14	0	13	2	2016-03-20	2016-04-20	2016-05-22	2016-06-22	2016-07-24	2016-08-22	2016-09-24	2016-10-23	13.2		13.3						90	92	90	94	93	92	92	92
140186	14	0	36	2	2016-03-20	2016-04-20	2016-05-22	2016-06-22	2016-07-24	2016-08-22	2016-09-24	2016-10-23	14	13				13.3	13.5	13.4	90	90	92	92	92	90	90	90
140187	14	0	24	2	2016-03-20	2016-04-20	2016-05-22	2016-06-22	2016-07-24	2016-08-22	2016-09-24	2016-10-23	15.9	15.1	13.5	13.4	13.5	14	13.9	14.6	90	90	90	90	90	90	90	90
140188	14	0	48	1	2016-03-20	2016-04-20	2016-05-22	2016-06-22	2016-07-24	2016-08-22	2016-09-24	2016-10-23	16	14.9	14.5	14.3	15.1	14.8	15	15.1	90	90	90	90	90	90	90	90
140189	14	0	11	1	2016-03-20	2016-04-20	2016-05-22	2016-06-22	2016-07-24	2016-08-22	2016-09-24	2016-10-23	14.5								90	94	93	93	93	92	92	92
140190	14	0	36	2	2016-03-20	2016-04-20	2016-05-22	2016-06-22	2016-07-24	2016-08-22	2016-09-24	2016-10-23	16	16				15.4	15.1	15.1	90	90	93	93	93	90	90	90
140191	14	0	36	2	2016-03-20	2016-04-20	2016-05-22	2016-06-22	2016-07-24	2016-08-22	2016-09-24	2016-10-23	15.7	16.5	17.1	16.5	14.5	15.9			90	90	90	90	90	90	93	92
140192	14	0	21	1	2016-03-20	2016-04-20	2016-05-22	2016-06-22	2016-07-24	2016-08-22	2016-09-24	2016-10-23	12.5	11.8	12.6	13.4	13.6	13.5	13.6	13.7	90	90	90	90	90	90	90	90
140193	14	0	11	2	2016-03-20	2016-04-20	2016-05-22	2016-06-22	2016-07-24	2016-08-22	2016-09-24	2016-10-23	14		13.7	13	13.1	13	13.5	13.3	90	93	90	90	90	90	90	90
140194	14	0	42	2	2016-03-20	2016-04-20	2016-05-22	2016-06-22	2016-07-24	2016-08-22	2016-09-24	2016-10-23	15		14.8	14.7	14.6	15	14.7	14.3	90	93	90	90	90	90	90	90
140195	14	0	15	2	2016-03-20	2016-04-20	2016-05-22	2016-06-22	2016-07-24	2016-08-22	2016-09-24	2016-10-23	14.7	14.2					14.2	13.7	90	90	92	92	92	92	90	90
140196	14	0	36	2	2016-03-20	2016-04-20	2016-05-22	2016-06-22	2016-07-24	2016-08-22	2016-09-24	2016-10-23	14						15.2	15.6	90	94	94	93	92	92	90	90
140197	14	0	9	2	2016-03-20	2016-04-20	2016-05-22	2016-06-22	2016-07-24	2016-08-22	2016-09-24	2016-10-23	14.2	13.7	13.9	13.2	13	13.3	13.4	13.9	90	90	90	90	90	90	90	90
140198	14	0	18	1	2016-03-20	2016-04-20	2016-05-22	2016-06-22	2016-07-24	2016-08-22	2016-09-24	2016-10-23	12	11.9	13.5	13.1	13.2	13.9	14.2	14.4	90	90	90	90	90	90	90	90
140199	14	0	48	2	2016-03-20	2016-04-20	2016-05-22	2016-06-22	2016-07-24	2016-08-22	2016-09-24	2016-10-23	15.2	14.3	15.3	15.2	15.6	15.7	15.8	15.9	90	90	90	90	90	90	90	90
140200	14	0	24	2	2016-03-20	2016-04-20	2016-05-22	2016-06-22	2016-07-24	2016-08-22	2016-09-24	2016-10-23	14.5	14.9							90	90	93	93	92	92	92	92
130201	13	0	26	2	2016-03-20	2016-04-20	2016-05-22	2016-06-22	2016-07-24	2016-08-22	2016-09-24	2016-10-23	13.4	13.9			13.8	13.3	13.4	13	90	90	93	93	90	90	90	90
130202	13	0	54	2	2016-03-20	2016-04-20	2016-05-22	2016-06-22	2016-07-24	2016-08-22	2016-09-24	2016-10-23	15	14.5			15.3	14.7	14.2	14.1	90	90	93	93	90	90	90	90
130203	13	0	38	2	2016-03-20	2016-04-20	2016-05-22	2016-06-22	2016-07-24	2016-08-22	2016-09-24	2016-10-23	14.9	14.6	14.5		15.4	14.5			90	90	90	91	90	90	93	92
130204	13	0	30	2	2016-03-20	2016-04-20	2016-05-22	2016-06-22	2016-07-24	2016-08-22	2016-09-24	2016-10-23	15.4	14.5	14.4	14.6	14.8				90	90	90	90	90	93	93	92
130205	13	0	48	1	2016-03-20	2016-04-20	2016-05-22	2016-06-22	2016-07-24	2016-08-22	2016-09-24	2016-10-23	14.6	14.9		13.5	13.7	14.5			90	90	93	90	90	90	93	92
130206	13	0	9	2	2016-03-20	2016-04-20	2016-05-22	2016-06-22	2016-07-24	2016-08-22	2016-09-24	2016-10-23	12.7	12	12.1	12.6	12				90	90	90	90	90	94	93	92
130207	13	0	12	2	2016-03-20	2016-04-20	2016-05-22	2016-06-22	2016-07-24	2016-08-22	2016-09-24	2016-10-23	10.8	10.2		10.8		10.7	10.5		90	90	92	90	91	90	90	91
130208	13	0	50	1	2016-03-20	2016-04-20	2016-05-22	2016-06-22	2016-07-24	2016-08-22	2016-09-24	2016-10-23	16.7	16.6	15.8	16.3		16.5	16.6	17.1	90	90	90	90	91	90	90	90
130209	13	0	22	2	2016-03-20	2016-04-20	2016-05-22	2016-06-22	2016-07-24	2016-08-22	2016-09-24	2016-10-23	13.6	13.5	13.2	12.3	12.9	13.2	12.8	13.2	90	90	90	90	90	90	90	90
130210	13	0	42	1	2016-03-20	2016-04-20	2016-05-22	2016-06-22	2016-07-24	2016-08-22	2016-09-24	2016-10-23	14.9	14	14.3	14	15.1	14.5	14.1	15.3	90	90	90	90	90	90	90	90
130211	13	0	15	1	2016-03-20	2016-04-20	2016-05-22	2016-06-22	2016-07-24	2016-08-22	2016-09-24	2016-10-23	14	13.4	13.4	13.5	13.3	13.3	13.2	13.5	90	90	90	90	90	90	90	90
130212	13	0	46	2	2016-03-20	2016-04-20	2016-05-22	2016-06-22	2016-07-24	2016-08-22	2016-09-24	2016-10-23	15.6	15.2	15.3	15.3	15.5	14.9	15.3	15.9	90	90	90	90	90	90	90	90
130213	13	0	34	1	2016-03-20	2016-04-20	2016-05-22	2016-06-22	2016-07-24	2016-08-22	2016-09-24	2016-10-23	13.9	13.8	13.7	13.8	14.5	14.3	14.4	14.9	90	90	90	90	90	90	90	90
130214	13	0	36	2	2016-03-20	2016-04-20	2016-05-22	2016-06-22	2016-07-24	2016-08-22	2016-09-24	2016-10-23	13.9	14.5	14.1					15.1	90	90	90	92	92	92	92	90
130215	13	0	42	1	2016-03-20	2016-04-20	2016-05-22	2016-06-22	2016-07-24	2016-08-22	2016-09-24	2016-10-23	17.3	17	17.5	15.3	16.5	16.7	16	17.3	90	90	90	90	90	90	90	90
130216	13	0	10	2	2016-03-20	2016-04-20	2016-05-22	2016-06-22	2016-07-24	2016-08-22	2016-09-24	2016-10-23	16.5	15.8	16.3	16.2	15	15.4	15.3	15.6	90	90	90	90	90	90	90	90
130217	13	0	51	1	2016-03-20	2016-04-20	2016-05-22	2016-06-22	2016-07-24	2016-08-22	2016-09-24	2016-10-23	14.8	15.5	15.5				15.4	15.2	90	90	90	92	92	92	90	90
130218	13	0	8	2	2016-03-20	2016-04-20	2016-05-22	2016-06-22	2016-07-24	2016-08-22	2016-09-24	2016-10-23	10.7	11.5	12.2				11.4	12.1	90	90	90	92	92	92	90	90
130219	13	0	20	2	2016-03-20	2016-04-20	2016-05-22	2016-06-22	2016-07-24	2016-08-22	2016-09-24	2016-10-23	11.3	11.5	10.7	11.2	11.5		12	13.2	90	90	90	90	90	93	90	90
130220	13	0	50	1	2016-03-20	2016-04-20	2016-05-22	2016-06-22	2016-07-24	2016-08-22	2016-09-24	2016-10-23	12.7	12.3	12.5	11.9	12.4	12.5	12.3	13.3	90	90	90	90	90	90	90	90
170221	17	0	35	2	2016-03-20	2016-04-20	2016-05-22	2016-06-22	2016-07-24	2016-08-22	2016-09-24	2016-10-23	15.5	15.6	15.1	15	14.8	14.5	14.8	14.4	90	90	90	90	90	90	90	90
170222	17	0	8	2	2016-03-20	2016-04-20	2016-05-22	2016-06-22	2016-07-24	2016-08-22	2016-09-24	2016-10-23	14.4	14.9	14	14.5	14.6	14.5	14.6	14.7	90	90	90	90	90	90	90	90
170223	17	0	32	2	2016-03-20	2016-04-20	2016-05-22	2016-06-22	2016-07-24	2016-08-22	2016-09-24	2016-10-23	15.2	15.9	15.4	14.8	15	14.8	15.1		90	90	90	90	90	90	90	94
170224	17	0	28	2	2016-03-20	2016-04-20	2016-05-22	2016-06-22	2016-07-24	2016-08-22	2016-09-24	2016-10-23	14.9	15.1	14.8	14.5	14.7	14.8			90	90	90	90	90	90	93	93
170225	17	0	52	2	2016-03-20	2016-04-20	2016-05-22	2016-06-22	2016-07-24	2016-08-22	2016-09-24	2016-10-23	14.4	14.6	14.2	14.3	14.5	14.4	14	13.4	90	90	90	90	90	90	90	90
170226	17	0	42	1	2016-03-20	2016-04-20	2016-05-22	2016-06-22	2016-07-24	2016-08-22	2016-09-24	2016-10-23	15.3	14.7	14.8	14.4	14.6	14.5	14.8	14.6	90	90	90	90	90	90	90	90
170227	17	0	46	1	2016-03-20	2016-04-20	2016-05-22	2016-06-22	2016-07-24	2016-08-22	2016-09-24	2016-10-23	15.2	15.5	15.4	16	16.1	15.9	15.5	15.2	90	90	90	90	90	90	90	90
170228	17	0	41	1	2016-03-20	2016-04-20	2016-05-22	2016-06-22	2016-07-24	2016-08-22	2016-09-24	2016-10-23	16	15.6							90	90	92	92	92	92	92	92
170229	17	0	30	1	2016-03-20	2016-04-20	2016-05-22	2016-06-22	2016-07-24	2016-08-22	2016-09-24	2016-10-23	13.8	14.1							90	90	91	96	96	96	96	92
170230	17	0	48	2	2016-03-20	2016-04-20	2016-05-22	2016-06-22	2016-07-24	2016-08-22	2016-09-24	2016-10-23	16.5	16.5	16.7	16.5	16.8	16.5	16.4	16.3	90	90	90	90	90	90	90	90
170231	17	0	10	2	2016-03-20	2016-04-20	2016-05-22	2016-06-22	2016-07-24	2016-08-22	2016-09-24	2016-10-23	13.6	14.8	15.2	14.2	14.6	14.7	14.8		90	90	90	90	90	90	90	92
170232	17	0	42	1	2016-03-20	2016-04-20	2016-05-22	2016-06-22	2016-07-24	2016-08-22	2016-09-24	2016-10-23	16.7	16.5	16	16.6	17	16.4	16.7	15.7	90	90	90	90	90	90	90	90
170233	17	0	48	1	2016-03-20	2016-04-20	2016-05-22	2016-06-22	2016-07-24	2016-08-22	2016-09-24	2016-10-23	14.8	15.3	14.9	15	15.1	14.7	14.5	14.4	90	90	90	90	90	90	90	90
170234	17	0	43	2	2016-03-20	2016-04-20	2016-05-22	2016-06-22	2016-07-24	2016-08-22	2016-09-24	2016-10-23	16.3								90	96	93	93	93	93	93	92
170235	17	0	10	1	2016-03-20	2016-04-20	2016-05-22	2016-06-22	2016-07-24	2016-08-22	2016-09-24	2016-10-23	13.8	13.9	14.4	15	14.8	15	15.1		90	90	90	90	90	90	90	92
170236	17	0	27	2	2016-03-20	2016-04-20	2016-05-22	2016-06-22	2016-07-24	2016-08-22	2016-09-24	2016-10-23	13.3								90	96	92	92	92	92	92	92
170237	17	0	36	2	2016-03-20	2016-04-20	2016-05-22	2016-06-22	2016-07-24	2016-08-22	2016-09-24	2016-10-23	15.5	13.3	13.5	13.3	13.1	13.7	13.5		90	90	90	90	90	90	90	92
170238	17	0	17	1	2016-03-20	2016-04-20	2016-05-22	2016-06-22	2016-07-24	2016-08-22	2016-09-24	2016-10-23	11.2	12.3	13.3	12.8	12.6	13.2	14.4	14.5	90	90	90	90	90	90	90	90
170239	17	0	39	1	2016-03-20	2016-04-20	2016-05-22	2016-06-22	2016-07-24	2016-08-22	2016-09-24	2016-10-23	16.6	16.7	16.9	16.2	16.3	16.8	17	16.3	90	90	90	90	90	90	90	90
170240	17	0	41	1	2016-03-20	2016-04-20	2016-05-22	2016-06-22	2016-07-24	2016-08-22	2016-09-24	2016-10-23	14.3	14.4		14.9	15	14.8	14.6	14.2	90	90	91	90	90	90	90	90
40241	4	1	22	2	2016-03-20	2016-04-20	2016-05-22	2016-06-22	2016-07-24	2016-08-22	2016-09-24	2016-10-23	15.6	15.4	15.4	15	14.5	14.6	14.4	14.7	90	90	90	90	90	90	90	90
40242	4	1	54	1	2016-03-20	2016-04-20	2016-05-22	2016-06-22	2016-07-24	2016-08-22	2016-09-24	2016-10-23	14.3	14.1	15	15.2	14.9	15	15.2	15	90	90	90	90	90	90	90	90
40243	4	1	42	1	2016-03-20	2016-04-20	2016-05-22	2016-06-22	2016-07-24	2016-08-22	2016-09-24	2016-10-23	13.5	13.3	13.5	13.5	13.4	14	13.6	13.5	90	90	90	90	90	90	90	90
40244	4	1	38	1	2016-03-20	2016-04-20	2016-05-22	2016-06-22	2016-07-24	2016-08-22	2016-09-24	2016-10-23	15.4	15.3	14.9	13.9	14.3	14.4	14.5	14.7	90	90	90	90	90	90	90	90
40245	4	1	30	2	2016-03-20	2016-04-20	2016-05-22	2016-06-22	2016-07-24	2016-08-22	2016-09-24	2016-10-23	14.9	15.4	16.1	15.1	15.1	16	15.6	15.3	90	90	90	90	90	90	90	90
40246	4	1	12	1	2016-03-20	2016-04-20	2016-05-22	2016-06-22	2016-07-24	2016-08-22	2016-09-24	2016-10-23	11.8	12.3	11.5	11.4	12.2	12.6	12.3	12.2	90	90	90	90	90	90	90	90
40247	4	1	18	1	2016-03-20	2016-04-20	2016-05-22	2016-06-22	2016-07-24	2016-08-22	2016-09-24	2016-10-23	12.7	12.7			14.1	14	14.2	14.4	90	90	91	91	90	90	90	90
40248	4	1	22	1	2016-03-20	2016-04-20	2016-05-22	2016-06-22	2016-07-24	2016-08-22	2016-09-24	2016-10-23	13.7		13.3	13.1	13.9	13.4	13.5	13.4	90	92	90	90	90	90	90	90
40249	4	1	42	1	2016-03-20	2016-04-20	2016-05-22	2016-06-22	2016-07-24	2016-08-22	2016-09-24	2016-10-23	14.1	13.1	13.5	13.2	13.6	13.5	14	13.5	90	90	90	90	90	90	90	90
40250	4	1	36	2	2016-03-20	2016-04-20	2016-05-22	2016-06-22	2016-07-24	2016-08-22	2016-09-24	2016-10-23	15.7	15.6	15.7	16.1	15.2	15.4	14.7	14.9	90	90	90	90	90	90	90	90
40251	4	1	48	2	2016-03-20	2016-04-20	2016-05-22	2016-06-22	2016-07-24	2016-08-22	2016-09-24	2016-10-23	14.6	13.7	13.9	14.1	13.7	13.4	13.5	13.6	90	90	90	90	90	90	90	90
40252	4	1	48	2	2016-03-20	2016-04-20	2016-05-22	2016-06-22	2016-07-24	2016-08-22	2016-09-24	2016-10-23	17.1	17	18.1	17.2	17.4	16.8	17.2	16.1	90	90	90	90	90	90	90	90
40253	4	1	9	2	2016-03-20	2016-04-20	2016-05-22	2016-06-22	2016-07-24	2016-08-22	2016-09-24	2016-10-23	14.2		15	15.1					90	91	90	90	92	92	92	92
40254	4	1	36	2	2016-03-20	2016-04-20	2016-05-22	2016-06-22	2016-07-24	2016-08-22	2016-09-24	2016-10-23	15.4		15.2	15.4					90	91	90	90	92	92	92	92
40255	4	1	54	1	2016-03-20	2016-04-20	2016-05-22	2016-06-22	2016-07-24	2016-08-22	2016-09-24	2016-10-23	17.9	17.1	17.5	17.3	17.2	17.6	16.9	16.9	90	90	90	90	90	90	90	90
40256	4	1	24	1	2016-03-20	2016-04-20	2016-05-22	2016-06-22	2016-07-24	2016-08-22	2016-09-24	2016-10-23	15.7	14.9	14.8	14.9	13.9	13.4	13.8	14	90	90	90	90	90	90	90	90
40257	4	1	48	1	2016-03-20	2016-04-20	2016-05-22	2016-06-22	2016-07-24	2016-08-22	2016-09-24	2016-10-23	16.4	15.4	13.8	15.1	15.5	15.6	15.2	15.3	90	90	90	90	90	90	90	90
40258	4	1	41	1	2016-03-20	2016-04-20	2016-05-22	2016-06-22	2016-07-24	2016-08-22	2016-09-24	2016-10-23	16.3	15.6	15.6	14.8	15.8	15.3	15.4	15.5	90	90	90	90	90	90	90	90
40259	4	1	15	1	2016-03-20	2016-04-20	2016-05-22	2016-06-22	2016-07-24	2016-08-22	2016-09-24	2016-10-23	13.4	12.6	12.5	11.6					90	90	90	90	91	95	95	95
40260	4	1	11	2	2016-03-20	2016-04-20	2016-05-22	2016-06-22	2016-07-24	2016-08-22	2016-09-24	2016-10-23	12.4	13.1	12.1	11.7	12.5	12.6	12.2	12.5	90	90	90	90	90	90	90	90
120261	12	1	44	1	2016-03-20	2016-04-20	2016-05-22	2016-06-22	2016-07-24	2016-08-22	2016-09-24	2016-10-23	13								90	91	92	92	92	92	92	92
120262	12	1	54	1	2016-03-20	2016-04-20	2016-05-22	2016-06-22	2016-07-24	2016-08-22	2016-09-24	2016-10-23	14.8								90	91	92	92	92	92	92	92
120263	12	1	44	1	2016-03-20	2016-04-20	2016-05-22	2016-06-22	2016-07-24	2016-08-22	2016-09-24	2016-10-23	12.4	12.9	12.4						90	90	90	92	92	92	92	92
120264	12	1	45	2	2016-03-20	2016-04-20	2016-05-22	2016-06-22	2016-07-24	2016-08-22	2016-09-24	2016-10-23	15.5	15.5	14.8		15.3	14.5	15	15.5	90	90	90	96	90	90	90	90
120265	12	1	19	2	2016-03-20	2016-04-20	2016-05-22	2016-06-22	2016-07-24	2016-08-22	2016-09-24	2016-10-23	13	12.2	12.5		13.8	13	13.5	13.2	90	90	90	93	90	90	90	90
120266	12	1	7	2	2016-03-20	2016-04-20	2016-05-22	2016-06-22	2016-07-24	2016-08-22	2016-09-24	2016-10-23	10.8	11.6	10.5			12.5	12.6	13	90	90	90	91	91	90	90	90
120267	12	1	10	2	2016-03-20	2016-04-20	2016-05-22	2016-06-22	2016-07-24	2016-08-22	2016-09-24	2016-10-23	13.1	13	12.6	12.5		13	12.9	12.7	90	90	90	90	91	90	90	90
120268	12	1	48	1	2016-03-20	2016-04-20	2016-05-22	2016-06-22	2016-07-24	2016-08-22	2016-09-24	2016-10-23	13.9	13.4	13	13.5	13.5	13.6	13.7	13.9	90	90	90	90	90	90	90	90
120269	12	1	8	2	2016-03-20	2016-04-20	2016-05-22	2016-06-22	2016-07-24	2016-08-22	2016-09-24	2016-10-23	12.3	11.5	10.6	11.3	11.4	12	12.3	12.4	90	90	90	90	90	90	90	90
120270	12	1	48	1	2016-03-20	2016-04-20	2016-05-22	2016-06-22	2016-07-24	2016-08-22	2016-09-24	2016-10-23	14.7	14.2	14.3	14.8	14.3	14.5	14.6		90	90	90	90	90	90	90	93
120271	12	1	24	2	2016-03-20	2016-04-20	2016-05-22	2016-06-22	2016-07-24	2016-08-22	2016-09-24	2016-10-23	13.7	14	14.3	14.5	14.6	13.5	14		90	90	90	90	90	90	90	93
120272	12	1	59	2	2016-03-20	2016-04-20	2016-05-22	2016-06-22	2016-07-24	2016-08-22	2016-09-24	2016-10-23	15.9	15.6	15.7	16.1	14.3	14.6	14.5		90	90	90	90	90	90	90	93
120273	12	1	36	1	2016-03-20	2016-04-20	2016-05-22	2016-06-22	2016-07-24	2016-08-22	2016-09-24	2016-10-23	15.5	14.7	13.6	14	14.2	14.6	16.1	16.5	90	90	90	90	90	90	90	90
120274	12	1	59	2	2016-03-20	2016-04-20	2016-05-22	2016-06-22	2016-07-24	2016-08-22	2016-09-24	2016-10-23	13.3	14.3	14.4	14.6	14.3	15	16	15.8	90	90	90	90	90	90	90	90
120275	12	1	59	1	2016-03-20	2016-04-20	2016-05-22	2016-06-22	2016-07-24	2016-08-22	2016-09-24	2016-10-23	14.8	14.6	14.5	15	15	14.4	15	15.2	90	90	90	90	90	90	90	90
120276	12	1	42	1	2016-03-20	2016-04-20	2016-05-22	2016-06-22	2016-07-24	2016-08-22	2016-09-24	2016-10-23	15.5								90	91	92	92	92	92	92	92
120277	12	1	24	1	2016-03-20	2016-04-20	2016-05-22	2016-06-22	2016-07-24	2016-08-22	2016-09-24	2016-10-23	14.1	13.6	13.1			12.5	13.7	14	90	90	90	91	92	90	90	90
120278	12	1	20	2	2016-03-20	2016-04-20	2016-05-22	2016-06-22	2016-07-24	2016-08-22	2016-09-24	2016-10-23	14.2	14.4							90	90	96	96	92	92	92	92
120279	12	1	36	2	2016-03-20	2016-04-20	2016-05-22	2016-06-22	2016-07-24	2016-08-22	2016-09-24	2016-10-23	14.3	14.4							90	90	96	96	92	92	92	92
120280	12	1	12	2	2016-03-20	2016-04-20	2016-05-22	2016-06-22	2016-07-24	2016-08-22	2016-09-24	2016-10-23	10.2	11.5	11.4	11.6	12	13.5	14	14.1	90	90	90	90	90	90	90	90
50281	5	1	7	1	2016-03-20	2016-04-20	2016-05-22	2016-06-22	2016-07-24	2016-08-22	2016-09-24	2016-10-23	14.3	13.6	14.1	13.5	14.4	13.7	14.1	14.2	90	90	90	90	90	90	90	90
50282	5	1	8	1	2016-03-20	2016-04-20	2016-05-22	2016-06-22	2016-07-24	2016-08-22	2016-09-24	2016-10-23	13	12.6	14.4	13.7	12.2	12.6	12.7	13.8	90	90	90	90	90	90	90	90
50283	5	1	29	1	2016-03-20	2016-04-20	2016-05-22	2016-06-22	2016-07-24	2016-08-22	2016-09-24	2016-10-23	14.3	14.8	14.1	11.8	12.7	13	13	13.6	90	90	90	90	90	90	90	90
50284	5	1	48	1	2016-03-20	2016-04-20	2016-05-22	2016-06-22	2016-07-24	2016-08-22	2016-09-24	2016-10-23	13.5	13.5	13.9	12.4	12.1	12.7	13.5	13.6	90	90	90	90	90	90	90	90
50285	5	1	13	2	2016-03-20	2016-04-20	2016-05-22	2016-06-22	2016-07-24	2016-08-22	2016-09-24	2016-10-23	12	12.9	12.7	12.3		13.1	13.1	13.1	90	90	90	90	93	90	90	90
50286	5	1	28	1	2016-03-20	2016-04-20	2016-05-22	2016-06-22	2016-07-24	2016-08-22	2016-09-24	2016-10-23	14.6	15.5	14.7	14.5	15.8	14.9	15	15.3	90	90	90	90	90	90	90	90
50287	5	1	38	1	2016-03-20	2016-04-20	2016-05-22	2016-06-22	2016-07-24	2016-08-22	2016-09-24	2016-10-23	15.1	14.8	14.6	14.2		14.6	14.6	14.6	90	90	90	90	93	90	90	90
50288	5	1	53	2	2016-03-20	2016-04-20	2016-05-22	2016-06-22	2016-07-24	2016-08-22	2016-09-24	2016-10-23	15.7	15.8	15.7	15.5	15.7	15.6	15.5	16	90	90	90	90	90	90	90	90
50289	5	1	37	2	2016-03-20	2016-04-20	2016-05-22	2016-06-22	2016-07-24	2016-08-22	2016-09-24	2016-10-23	16.7	16.4	16.8	16.6	17.5	16.8	16.4	16.8	90	90	90	90	90	90	90	90
50290	5	1	46	1	2016-03-20	2016-04-20	2016-05-22	2016-06-22	2016-07-24	2016-08-22	2016-09-24	2016-10-23	16.6	16.7	17.7	16.7	17.6	17.2	17.1	16.7	90	90	90	90	90	90	90	90
50291	5	1	14	2	2016-03-20	2016-04-20	2016-05-22	2016-06-22	2016-07-24	2016-08-22	2016-09-24	2016-10-23	14.1	13.5	13.9		14.8	14.4	14.4	13.8	90	90	90	91	90	90	90	90
50292	5	1	40	2	2016-03-20	2016-04-20	2016-05-22	2016-06-22	2016-07-24	2016-08-22	2016-09-24	2016-10-23	16.4	15.9	16.1	16.3	16.1	16.6	16.7	16	90	90	90	90	90	90	90	90
50293	5	1	47	1	2016-03-20	2016-04-20	2016-05-22	2016-06-22	2016-07-24	2016-08-22	2016-09-24	2016-10-23	15.4	15	14.5	15.5	14.7	15.1	15.7	15.8	90	90	90	90	90	90	90	90
50294	5	1	59	1	2016-03-20	2016-04-20	2016-05-22	2016-06-22	2016-07-24	2016-08-22	2016-09-24	2016-10-23	16.4	16.1	15.3	15.9	16	15.6	15.2	16.4	90	90	90	90	90	90	90	90
50295	5	1	29	1	2016-03-20	2016-04-20	2016-05-22	2016-06-22	2016-07-24	2016-08-22	2016-09-24	2016-10-23	14.5	14.9	14.8	14.9	15.7	15.4	15.3	15	90	90	90	90	90	90	90	90
50296	5	1	41	1	2016-03-20	2016-04-20	2016-05-22	2016-06-22	2016-07-24	2016-08-22	2016-09-24	2016-10-23	14.7	14.8	14.2	14.8	14.8	14.3	14.7	14.7	90	90	90	90	90	90	90	90
50297	5	1	53	1	2016-03-20	2016-04-20	2016-05-22	2016-06-22	2016-07-24	2016-08-22	2016-09-24	2016-10-23	16.1	16.3	15.2	15.3	15.7	15.7	15.6	15.2	90	90	90	90	90	90	90	90
50298	5	1	7	2	2016-03-20	2016-04-20	2016-05-22	2016-06-22	2016-07-24	2016-08-22	2016-09-24	2016-10-23	12.1	12.5	12.6	12.2					90	90	90	90	91	96	92	92
50299	5	1	25	2	2016-03-20	2016-04-20	2016-05-22	2016-06-22	2016-07-24	2016-08-22	2016-09-24	2016-10-23	13.3	14.4	13.7	11.6					90	90	90	90	95	95	95	95
50300	5	1	19	1	2016-03-20	2016-04-20	2016-05-22	2016-06-22	2016-07-24	2016-08-22	2016-09-24	2016-10-23	14.5	14.3	14.4	14.7	15.4	15.2	14.7	14.5	90	90	90	90	90	90	90	90
140301	14	0	33	2	2016-03-21	2016-04-20	2016-05-22	2016-06-22	2016-07-24	2016-08-23	2016-09-25	2016-10-24	15.1	15.8	15.5	15.6	15.1	15.6	15.1	15.5	90	90	90	90	90	90	90	90
140302	14	0	48	2	2016-03-21	2016-04-20	2016-05-22	2016-06-22	2016-07-24	2016-08-23	2016-09-25	2016-10-24	15.1	15.5	16	16.3	15.4	16.9	16.2	16.4	90	90	90	90	90	90	90	90
140303	14	0	24	1	2016-03-21	2016-04-20	2016-05-22	2016-06-22	2016-07-24	2016-08-23	2016-09-25	2016-10-24	13.5	14.4	13.7	14.4					90	90	90	90	95	95	95	95
140304	14	0	36	2	2016-03-21	2016-04-20	2016-05-22	2016-06-22	2016-07-24	2016-08-23	2016-09-25	2016-10-24	14.7	14.2	14.5	14.7	14.8	15	15.1	14.5	90	90	90	90	90	90	90	90
140305	14	0	24	2	2016-03-21	2016-04-20	2016-05-22	2016-06-22	2016-07-24	2016-08-23	2016-09-25	2016-10-24	14.6	15	14.7	14.9	14.8	14.9	15.1	15.4	90	90	90	90	90	90	90	90
140306	14	0	11	2	2016-03-21	2016-04-23	2016-05-22	2016-06-22	2016-07-24	2016-08-23	2016-09-25	2016-10-24	13.5	14	13.7	13.2	13.5	13.4	13.5	13.5	90	90	90	90	90	90	90	90
140307	14	0	36	1	2016-03-21	2016-04-23	2016-05-22	2016-06-22	2016-07-24	2016-08-23	2016-09-25	2016-10-24	12.9	12.6	12.7	12.3	13	12.2	12.4	12	90	90	90	90	90	90	90	90
140308	14	0	48	1	2016-03-21	2016-04-23	2016-05-22	2016-06-22	2016-07-24	2016-08-23	2016-09-25	2016-10-24	15	15	15.1	15	16	14.5	15.5	15.4	90	90	90	90	90	90	90	90
140309	14	0	24	2	2016-03-21	2016-04-23	2016-05-22	2016-06-22	2016-07-24	2016-08-23	2016-09-25	2016-10-24	14.3	15						15.6	90	90	93	93	91	92	93	90
140310	14	0	36	2	2016-03-21	2016-04-23	2016-05-22	2016-06-22	2016-07-24	2016-08-23	2016-09-25	2016-10-24	14.9	15.3	14.7	15.1	15.6	15.3	15.4		90	90	90	90	90	90	90	92
140311	14	0	36	2	2016-03-21	2016-04-23	2016-05-22	2016-06-22	2016-07-24	2016-08-23	2016-09-25	2016-10-24	13	12.7	12.5	13.1	13.6	14.8	14.9	14.4	90	90	90	90	90	90	90	90
140312	14	0	12	2	2016-03-21	2016-04-23	2016-05-22	2016-06-22	2016-07-24	2016-08-23	2016-09-25	2016-10-24	13.2	12.8	12.5	12.7	13.3	13.4	13.5	13.1	90	90	90	90	90	90	90	90
140313	14	0	36	1	2016-03-21	2016-04-23	2016-05-22	2016-06-22	2016-07-24	2016-08-23	2016-09-25	2016-10-24	12.9	13.6	14.6	15	15.1	15.6	15.6	15.1	90	90	90	90	90	90	90	90
140314	14	0	40	1	2016-03-21	2016-04-23	2016-05-22	2016-06-22	2016-07-24	2016-08-23	2016-09-25	2016-10-24	14	13.5	14						90	90	90	96	92	92	92	92
140315	14	0	24	2	2016-03-21	2016-04-23	2016-05-22	2016-06-22	2016-07-24	2016-08-23	2016-09-25	2016-10-24	12	12.5	11.8	12.1	12	12.5	12.3	12.1	90	90	90	90	90	90	90	90
140316	14	0	48	2	2016-03-21	2016-04-23	2016-05-22	2016-06-22	2016-07-24	2016-08-23	2016-09-25	2016-10-24	17	16	16.6	16.5	17	17.2	15.8	15.5	90	90	90	90	90	90	90	90
140317	14	0	48	1	2016-03-21	2016-04-23	2016-05-22	2016-06-22	2016-07-24	2016-08-23	2016-09-25	2016-10-24	13.7		14.8	14.6	14.7	14.9	15	14.5	90	94	90	90	90	90	90	90
140318	14	0	24	2	2016-03-21	2016-04-23	2016-05-22	2016-06-22	2016-07-24	2016-08-23	2016-09-25	2016-10-24	14	14.9				14.5	15.1	14.2	90	90	92	92	92	90	90	90
140319	14	0	17	1	2016-03-21	2016-04-23	2016-05-22	2016-06-22	2016-07-24	2016-08-23	2016-09-25	2016-10-24	13.8	13.7	13.7	13.4	13.2	14.3	14	13.6	90	90	90	90	90	90	90	90
140320	14	0	48	1	2016-03-21	2016-04-23	2016-05-22	2016-06-22	2016-07-24	2016-08-23	2016-09-25	2016-10-24	15	13.9	13.8	14	14.4	14.2	15	15.1	90	90	90	90	90	90	90	90
130321	13	0	29	1	2016-03-21	2016-04-23	2016-05-22	2016-06-22	2016-07-24	2016-08-23	2016-09-25	2016-10-24	15.1	14.9	14.6	15.3	15.2	15.5	15.2	15.8	90	90	90	90	90	90	90	90
130322	13	0	8	2	2016-03-21	2016-04-23	2016-05-22	2016-06-22	2016-07-24	2016-08-23	2016-09-25	2016-10-24	12.6	12.7	12.8	12.7	12.6	13.2	13	13.3	90	90	90	90	90	90	90	90
130323	13	0	50	1	2016-03-21	2016-04-20	2016-05-22	2016-06-22	2016-07-24	2016-08-23	2016-09-25	2016-10-24	15	15	15.4	14.9	15	15.1	14.7	14.8	90	90	90	90	90	90	90	90
130324	13	0	39	2	2016-03-21	2016-04-23	2016-05-22	2016-06-22	2016-07-24	2016-08-23	2016-09-25	2016-10-24	15.2	14.8	14.5	15	15.3	15.5	14.9	14.7	90	90	90	90	90	90	90	90
130325	13	0	42	1	2016-03-21	2016-04-23	2016-05-22	2016-06-22	2016-07-24	2016-08-23	2016-09-25	2016-10-24	14.1	13.2	13	13.5	13.8	13.7	13.4	13.6	90	90	90	90	90	90	90	90
130326	13	0	22	1	2016-03-21	2016-04-23	2016-05-22	2016-06-22	2016-07-24	2016-08-23	2016-09-25	2016-10-24	14.1	13.5	13.3		13.1	13.9	13	13.2	90	90	90	91	90	90	90	90
130327	13	0	22	2	2016-03-21	2016-04-23	2016-05-22	2016-06-22	2016-07-24	2016-08-23	2016-09-25	2016-10-24	12.2	11	10.8	11.5	12.1				90	90	90	90	90	94	94	92
130328	13	0	20	2	2016-03-21	2016-04-23	2016-05-22	2016-06-22	2016-07-24	2016-08-23	2016-09-25	2016-10-24	13.4	12.8	13.6	13.5	14.4	13.7	14.1		90	90	90	90	90	90	90	92
130329	13	0	36	1	2016-03-21	2016-04-23	2016-05-22	2016-06-22	2016-07-24	2016-08-23	2016-09-25	2016-10-24	15.5	14.8	15	15.1	15.5	15.3	15.2		90	90	90	90	90	90	90	92
130330	13	0	13	2	2016-03-21	2016-04-23	2016-05-22	2016-06-22	2016-07-24	2016-08-23	2016-09-25	2016-10-24	12.9	12.1	12.3	12.5	12.8	13	12.7	12.8	90	90	90	90	90	90	90	90
130331	13	0	46	2	2016-03-21	2016-04-23	2016-05-22	2016-06-22	2016-07-24	2016-08-23	2016-09-25	2016-10-24	14.4	13.5	15	14.1	14.5	14.6	13.8	13.9	90	90	90	90	90	90	90	90
130332	13	0	8	1	2016-03-21	2016-04-23	2016-05-22	2016-06-22	2016-07-24	2016-08-23	2016-09-25	2016-10-24	13.5		14.2	13.7	14		12.9	12.6	90	91	90	90	90	93	90	90
130333	13	0	56	2	2016-03-21	2016-04-23	2016-05-22	2016-06-22	2016-07-24	2016-08-23	2016-09-25	2016-10-24	16.1	15.6	15.5	15.8	15.1	15.5	15.1	15	90	90	90	90	90	90	90	90
130334	13	0	30	1	2016-03-21	2016-04-23	2016-05-22	2016-06-22	2016-07-24	2016-08-23	2016-09-25	2016-10-24	14.2	14	13.8	14.8	14.5	14	13.9	13.5	90	90	90	90	90	90	90	90
130335	13	0	15	1	2016-03-21	2016-04-23	2016-05-22	2016-06-22	2016-07-24	2016-08-23	2016-09-25	2016-10-24	12.6	12.5	11.5	12	12.3	12.4	12.6	13	90	90	90	90	90	90	90	90
130336	13	0	48	2	2016-03-21	2016-04-23	2016-05-22	2016-06-22	2016-07-24	2016-08-23	2016-09-25	2016-10-24	15.5	15.4	14.8						90	90	90	92	92	92	92	92
130337	13	0	8	1	2016-03-21	2016-04-23	2016-05-22	2016-06-22	2016-07-24	2016-08-23	2016-09-25	2016-10-24	13.9								90	91	91	92	92	92	92	92
130338	13	0	39	2	2016-03-21	2016-04-23	2016-05-22	2016-06-22	2016-07-24	2016-08-23	2016-09-25	2016-10-24	12.8	12.6	12.8	12.6	12.6		13.4	12.7	90	90	90	90	90	93	90	90
130339	13	0	20	1	2016-03-21	2016-04-23	2016-05-22	2016-06-22	2016-07-24	2016-08-23	2016-09-25	2016-10-24	13.5	12.8	13.7	12.8	13.2	14	12.9	12.7	90	90	90	90	90	90	90	90
130340	13	0	32	2	2016-03-21	2016-04-23	2016-05-22	2016-06-22	2016-07-24	2016-08-23	2016-09-25	2016-10-24	14.3	13.8	14.4	13.9	14.4	14.5	14.3	14.1	90	90	90	90	90	90	90	90
170341	17	0	21	1	2016-03-21	2016-04-23	2016-05-22	2016-06-22	2016-07-24	2016-08-23	2016-09-25	2016-10-24	14.9	15.4	15	15.3	15.1	15.4	15.6	14.5	90	90	90	90	90	90	90	90
170342	17	0	22	2	2016-03-21	2016-04-23	2016-05-22	2016-06-22	2016-07-24	2016-08-23	2016-09-25	2016-10-24	15.2	15.6	15.7	15.5	15.3	15.5	15.8		90	90	90	90	90	90	90	92
170343	17	0	57	2	2016-03-21	2016-04-23	2016-05-22	2016-06-22	2016-07-24	2016-08-23	2016-09-25	2016-10-24	16.2	15.5	15.4	14.7	15	15.4	15.6		90	90	90	90	90	90	90	92
170344	17	0	48	1	2016-03-21	2016-04-23	2016-05-22	2016-06-22	2016-07-24	2016-08-23	2016-09-25	2016-10-24	14.6	14.9	14.8	14.2	14	14.3	14.5		90	90	90	90	90	90	90	92
170345	17	0	36	1	2016-03-21	2016-04-23	2016-05-22	2016-06-22	2016-07-24	2016-08-23	2016-09-25	2016-10-24	13.7	13.4	12.5	12	12.3	12.6	12.4		90	90	90	90	90	90	90	92
170346	17	0	37	2	2016-03-21	2016-04-23	2016-05-22	2016-06-22	2016-07-24	2016-08-23	2016-09-25	2016-10-24	16.7	16.5	16.3	15.5	15.4	15.6	15.9	14.3	90	90	90	90	90	90	90	90
170347	17	0	34	1	2016-03-21	2016-04-23	2016-05-22	2016-06-22	2016-07-24	2016-08-23	2016-09-25	2016-10-24	16.2	16	15.9	15.6	15.5	15.9	16.1	15.3	90	90	90	90	90	90	90	90
170348	17	0	42	1	2016-03-21	2016-04-23	2016-05-22	2016-06-22	2016-07-24	2016-08-23	2016-09-25	2016-10-24	15.6	14.4	12.1	14.5		14.8	15	14	90	90	90	90	91	90	90	90
170349	17	0	48	2	2016-03-21	2016-04-23	2016-05-22	2016-06-22	2016-07-24	2016-08-23	2016-09-25	2016-10-24	15	14.9	14.8	14.5	14	14.2	14.3	13.9	90	90	90	90	90	90	90	90
170350	17	0	18	1	2016-03-21	2016-04-23	2016-05-22	2016-06-22	2016-07-24	2016-08-23	2016-09-25	2016-10-24	12.7	13.4	13.5	13.4				15.9	90	90	90	90	93	93	93	90
170351	17	0	30	2	2016-03-21	2016-04-23	2016-05-22	2016-06-22	2016-07-24	2016-08-23	2016-09-25	2016-10-24	16.2	15.9	16.1	15.5				13.4	90	90	90	90	93	93	93	90
170352	17	0	21	1	2016-03-21	2016-04-23	2016-05-22	2016-06-22	2016-07-24	2016-08-23	2016-09-25	2016-10-24	15	15.2	15.1	15	14.8	14.6	14.8	13.9	90	90	90	90	90	90	90	90
170353	17	0	36	1	2016-03-21	2016-04-23	2016-05-22	2016-06-22	2016-07-24	2016-08-23	2016-09-25	2016-10-24	16.9	16.3							90	90	92	92	92	92	92	92
170354	17	0	34	1	2016-03-21	2016-04-23	2016-05-22	2016-06-22	2016-07-24	2016-08-23	2016-09-25	2016-10-24	14.7	14.8	14.7		15	15.4	15.6	15.7	90	90	90	93	90	90	90	90
170355	17	0	40	1	2016-03-21	2016-04-23	2016-05-22	2016-06-22	2016-07-24	2016-08-23	2016-09-25	2016-10-24	14.5								90	92	92	92	92	92	92	92
170356	17	0	15	1	2016-03-21	2016-04-23	2016-05-22	2016-06-22	2016-07-24	2016-08-23	2016-09-25	2016-10-24	16			11.6	12	12.4	12.5	12.3	90	92	92	90	90	90	90	90
170357	17	0	45	2	2016-03-21	2016-04-23	2016-05-22	2016-06-22	2016-07-24	2016-08-23	2016-09-25	2016-10-24	15.6	15	15.2	14.8	15	15.1	15.3	15	90	90	90	90	90	90	90	90
170358	17	0	23	2	2016-03-21	2016-04-23	2016-05-22	2016-06-22	2016-07-24	2016-08-23	2016-09-25	2016-10-24	15.4	15.2	15.5				14.5	13.9	90	90	90	93	93	93	90	90
170359	17	0	42	2	2016-03-21	2016-04-23	2016-05-22	2016-06-22	2016-07-24	2016-08-23	2016-09-25	2016-10-24	15.9	15.8		16		15.8	16		90	90	94	90	91	90	90	92
170360	17	0	54	1	2016-03-21	2016-04-23	2016-05-22	2016-06-22	2016-07-24	2016-08-23	2016-09-25	2016-10-24	15	15.4		15.5	15.8	15.7	15.5	15.1	90	90	93	90	90	90	90	90
40361	4	1	46	2	2016-03-21	2016-04-20	2016-05-22	2016-06-22	2016-07-24	2016-08-23	2016-09-25	2016-10-24	16.3			14.1	15.6	15.5	15.4	15.1	90	94	93	90	90	90	90	90
40362	4	1	22	2	2016-03-21	2016-04-20	2016-05-22	2016-06-22	2016-07-24	2016-08-23	2016-09-25	2016-10-24	14.9	16.2	15.9	12.3	12.4				90	90	90	90	90	94	93	93
40363	4	1	42	1	2016-03-21	2016-04-20	2016-05-22	2016-06-22	2016-07-24	2016-08-23	2016-09-25	2016-10-24	16.3	15.9	15.4	15.4	15.6	15.4	15.6	15.9	90	90	90	90	90	90	90	90
40364	4	1	50	2	2016-03-21	2016-04-20	2016-05-22	2016-06-22	2016-07-24	2016-08-23	2016-09-25	2016-10-24	16	16.1	16.3	15.5	16.6	16	16.1		90	90	90	90	90	90	90	93
40365	4	1	36	2	2016-03-21	2016-04-20	2016-05-22	2016-06-22	2016-07-24	2016-08-23	2016-09-25	2016-10-24	14.7	14.4	13.7	13	14.5	14.4	14.9	14.1	90	90	90	90	90	90	90	90
40366	4	1	20	2	2016-03-21	2016-04-23	2016-05-22	2016-06-22	2016-07-24	2016-08-23	2016-09-25	2016-10-24	12.4	12	13.8	13	15.9		15.1		90	90	90	90	90	93	90	91
40367	4	1	48	2	2016-03-21	2016-04-23	2016-05-22	2016-06-22	2016-07-24	2016-08-23	2016-09-25	2016-10-24	14.2	14.4	14.4	14.1	14	14.3	13.3	13.4	90	90	90	90	90	90	90	90
40368	4	1	48	2	2016-03-21	2016-04-23	2016-05-22	2016-06-22	2016-07-24	2016-08-23	2016-09-25	2016-10-24	16.2	16.1	14		14.6	13.9	16.2		90	90	90	94	90	90	90	92
40369	4	1	30	2	2016-03-21	2016-04-23	2016-05-22	2016-06-22	2016-07-24	2016-08-23	2016-09-25	2016-10-24	15.7	15.6	14.3	15	14.5	18	14.6	15.1	90	90	90	90	90	90	90	90
40370	4	1	32	2	2016-03-21	2016-04-23	2016-05-22	2016-06-22	2016-07-24	2016-08-23	2016-09-25	2016-10-24	15	15.1	14.8	15.3	15.9	15.6	15.8	15.3	90	90	90	90	90	90	90	90
40371	4	1	56	1	2016-03-21	2016-04-23	2016-05-22	2016-06-22	2016-07-24	2016-08-23	2016-09-25	2016-10-24	14.9	15.4	15.8	15.5	15.1	15.3	15.7	15.4	90	90	90	90	90	90	90	90
40372	4	1	18	1	2016-03-21	2016-04-23	2016-05-22	2016-06-22	2016-07-24	2016-08-23	2016-09-25	2016-10-24	13.4	13.6	13.5	14.2	14.3	14.3	14.2	14.1	90	90	90	90	90	90	90	90
40373	4	1	9	1	2016-03-21	2016-04-23	2016-05-22	2016-06-22	2016-07-24	2016-08-23	2016-09-25	2016-10-24	12	12							90	90	94	96	92	92	92	92
40374	4	1	15	2	2016-03-21	2016-04-23	2016-05-22	2016-06-22	2016-07-24	2016-08-23	2016-09-25	2016-10-24	11.9								90	91	96	96	96	96	96	96
40375	4	1	18	1	2016-03-21	2016-04-23	2016-05-22	2016-06-22	2016-07-24	2016-08-23	2016-09-25	2016-10-24	14.5	13.5	13	12.9	13.4	13	12.7	12.6	90	90	90	90	90	90	90	90
40376	4	1	30	1	2016-03-21	2016-04-23	2016-05-22	2016-06-22	2016-07-24	2016-08-23	2016-09-25	2016-10-24	13.9	12.8	13	13.2	13.1	13	13.7	13.3	90	90	90	90	90	90	90	90
40377	4	1	24	1	2016-03-21	2016-04-23	2016-05-22	2016-06-22	2016-07-24	2016-08-23	2016-09-25	2016-10-24	12.1								90	95	95	95	95	95	95	95
40378	4	1	36	2	2016-03-21	2016-04-23	2016-05-22	2016-06-22	2016-07-24	2016-08-23	2016-09-25	2016-10-24	15.6	16	14.7	14.9	15.7	15	15.4	15	90	90	90	90	90	90	90	90
40379	4	1	16	1	2016-03-21	2016-04-23	2016-05-22	2016-06-22	2016-07-24	2016-08-23	2016-09-25	2016-10-24	13.4	13.3	13.1	12.7	14.3	12.9	13	12.7	90	90	90	90	90	90	90	90
40380	4	1	45	1	2016-03-21	2016-04-23	2016-05-22	2016-06-22	2016-07-24	2016-08-23	2016-09-25	2016-10-24	13.9	14.4	13.9	14.2		14.1	14.4	14.3	90	90	90	90	94	90	90	90
30381	3	1	48	1	2016-03-21	2016-04-20	2016-05-22	2016-06-22	2016-07-24	2016-08-23	2016-09-25	2016-10-24	14.5				14				90	94	92	92	90	92	92	92
30382	3	1	8	2	2016-03-21	2016-04-20	2016-05-22	2016-06-22	2016-07-24	2016-08-23	2016-09-25	2016-10-24	11.6	12	12.1	12	12	12.6	12.5	13.2	90	90	90	90	90	90	90	90
30383	3	1	54	1	2016-03-21	2016-04-20	2016-05-22	2016-06-22	2016-07-24	2016-08-23	2016-09-25	2016-10-24	15.6	16.2	15.5	16	15.5	15.4	15.5	15.2	90	90	90	90	90	90	90	90
30384	3	1	59	2	2016-03-21	2016-04-20	2016-05-22	2016-06-22	2016-07-24	2016-08-23	2016-09-25	2016-10-24	15.2	14.5	14.2	14.8	15	15.1	14.5	14.6	90	90	90	90	90	90	90	90
30385	3	1	36	1	2016-03-21	2016-04-20	2016-05-22	2016-06-22	2016-07-24	2016-08-23	2016-09-25	2016-10-24	14.6	14.9	14.8	15	15.1	14.5	15.8	15	90	90	90	90	90	90	90	90
30386	3	1	48	1	2016-03-21	2016-04-23	2016-05-22	2016-06-22	2016-07-24	2016-08-23	2016-09-25	2016-10-24	15.6	15.9	15.7	16.2	16.2	14.5			90	90	90	90	90	90	93	93
30387	3	1	18	1	2016-03-21	2016-04-23	2016-05-22	2016-06-22	2016-07-24	2016-08-23	2016-09-25	2016-10-24	13.9	14.1	14.4	14.9	15	15.2	14.5	15	90	90	90	90	90	90	90	90
30388	3	1	59	1	2016-03-21	2016-04-23	2016-05-22	2016-06-22	2016-07-24	2016-08-23	2016-09-25	2016-10-24	14.5	14.2	14.6	14.5	14.9	15.2			90	90	90	90	90	90	92	92
30389	3	1	48	1	2016-03-21	2016-04-23	2016-05-22	2016-06-22	2016-07-24	2016-08-23	2016-09-25	2016-10-24	14.9	14.5	14	14.2	14.3				90	90	90	90	90	93	92	92
30390	3	1	59	1	2016-03-21	2016-04-23	2016-05-22	2016-06-22	2016-07-24	2016-08-23	2016-09-25	2016-10-24	16.9	16	15.8		15.1	15.1	15.5	15.7	90	90	90	91	90	90	90	90
30391	3	1	48	1	2016-03-21	2016-04-23	2016-05-22	2016-06-22	2016-07-24	2016-08-23	2016-09-25	2016-10-24	15.9	16	15.7	15.6	16	15.7	16	15.8	90	90	90	90	90	90	90	90
30392	3	1	36	1	2016-03-21	2016-04-23	2016-05-22	2016-06-22	2016-07-24	2016-08-23	2016-09-25	2016-10-24	15.1	15	14.9	16	15	14.9	15	14.8	90	90	90	90	90	90	90	90
30393	3	1	24	1	2016-03-21	2016-04-23	2016-05-22	2016-06-22	2016-07-24	2016-08-23	2016-09-25	2016-10-24	13.3	14.1	14.2						90	90	90	92	92	92	92	92
30394	3	1	8	2	2016-03-21	2016-04-23	2016-05-22	2016-06-22	2016-07-24	2016-08-23	2016-09-25	2016-10-24	13.1			13.5	13.4				90	91	91	90	90	92	92	92
30395	3	1	18	2	2016-03-21	2016-04-23	2016-05-22	2016-06-22	2016-07-24	2016-08-23	2016-09-25	2016-10-24	13.2	13	12.8	12	11.7	12	12.2	12.4	90	90	90	90	90	90	90	90
30396	3	1	36	2	2016-03-21	2016-04-23	2016-05-22	2016-06-22	2016-07-24	2016-08-23	2016-09-25	2016-10-24	13.1	15.1	13.3	13.2	13.5	13.7	13.6	13.8	90	90	90	90	90	90	90	90
30397	3	1	48	2	2016-03-21	2016-04-23	2016-05-22	2016-06-22	2016-07-24	2016-08-23	2016-09-25	2016-10-24	13.4	16	15.3	15.9	16.5				90	90	90	90	90	92	92	92
30398	3	1	30	1	2016-03-21	2016-04-23	2016-05-22	2016-06-22	2016-07-24	2016-08-23	2016-09-25	2016-10-24	15.5	15.8	16	16.1	16	15.5	16.4	15.5	90	90	90	90	90	90	90	90
30399	3	1	18	1	2016-03-21	2016-04-23	2016-05-22	2016-06-22	2016-07-24	2016-08-23	2016-09-25	2016-10-24	12.9	14.1	14.5	13.5	14	15	15.2	14.8	90	90	90	90	90	90	90	90
30400	3	1	48	2	2016-03-21	2016-04-23	2016-05-22	2016-06-22	2016-07-24	2016-08-23	2016-09-25	2016-10-24	15.6	15.6			16	16.1	16.5	15.9	90	90	93	93	90	90	90	90
50401	5	1	40	2	2016-03-21	2016-04-20	2016-05-23	2016-06-22	2016-07-24	2016-08-23	2016-09-25	2016-10-24	16.7	16.9	17.1	16.8	17.4	17.4	17.5	17.1	90	90	90	90	90	90	90	90
50402	5	1	30	1	2016-03-21	2016-04-20	2016-05-23	2016-06-22	2016-07-24	2016-08-23	2016-09-25	2016-10-24	12.2	12.7	12.1	12.6	13.6	13.6	13.5	13.8	90	90	90	90	90	90	90	90
50403	5	1	47	2	2016-03-21	2016-04-20	2016-05-23	2016-06-22	2016-07-24	2016-08-23	2016-09-25	2016-10-24	16.1	15.9	15.6	15.5	15.6	15.7	16	15.8	90	90	90	90	90	90	90	90
50404	5	1	21	2	2016-03-21	2016-04-20	2016-05-23	2016-06-22	2016-07-24	2016-08-23	2016-09-25	2016-10-24	14.1	14.6	14.6	13.6	14.7	15.2	14.4	14.4	90	90	90	90	90	90	90	90
50405	5	1	12	1	2016-03-21	2016-04-20	2016-05-23	2016-06-22	2016-07-24	2016-08-23	2016-09-25	2016-10-24	13.6	15.1	13.8	13.6	14.1	14.3	14.4	14.2	90	90	90	90	90	90	90	90
50406	5	1	40	2	2016-03-21	2016-04-23	2016-05-23	2016-06-22	2016-07-24	2016-08-23	2016-09-25	2016-10-24	16.1	16.2	15.7	16	15.9	15.9	15.9	16.6	90	90	90	90	90	90	90	90
50407	5	1	56	2	2016-03-21	2016-04-23	2016-05-23	2016-06-22	2016-07-24	2016-08-23	2016-09-25	2016-10-24	14.6	15.3	15.6	15	14.7	16.3	16	15.5	90	90	90	90	90	90	90	90
50408	5	1	18	2	2016-03-21	2016-04-23	2016-05-23	2016-06-22	2016-07-24	2016-08-23	2016-09-25	2016-10-24	13.6	13.1	13.3	12.8	13.9	13.3	13.8	13.3	90	90	90	90	90	90	90	90
50409	5	1	21	2	2016-03-21	2016-04-23	2016-05-23	2016-06-22	2016-07-24	2016-08-23	2016-09-25	2016-10-24	15.7	15.6	15.7	14.6	15.8	15.7	14.6	14.4	90	90	90	90	90	90	90	90
50410	5	1	24	2	2016-03-21	2016-04-23	2016-05-23	2016-06-22	2016-07-24	2016-08-23	2016-09-25	2016-10-24	13	14.1	14.3	14.4	14.2	14.7	14.9	14.8	90	90	90	90	90	90	90	90
50411	5	1	51	1	2016-03-21	2016-04-23	2016-05-23	2016-06-22	2016-07-24	2016-08-23	2016-09-25	2016-10-24	13.2	12.6	12.6	13	13.2	12.8	13	12.9	90	90	90	90	90	90	90	90
50412	5	1	40	1	2016-03-21	2016-04-23	2016-05-23	2016-06-22	2016-07-24	2016-08-23	2016-09-25	2016-10-24	14	15.6	14.8	15	15.1		14.4	15	90	90	90	90	90	94	90	90
50413	5	1	14	2	2016-03-21	2016-04-23	2016-05-23	2016-06-22	2016-07-24	2016-08-23	2016-09-25	2016-10-24	13.4	12.9	12.6	12.9	13.8	13.6	13.5	13.2	90	90	90	90	90	90	90	90
50414	5	1	52	2	2016-03-21	2016-04-23	2016-05-23	2016-06-22	2016-07-24	2016-08-23	2016-09-25	2016-10-24	13.6	13.3	13.1	13	13.9	13.3	13.9	13.6	90	90	90	90	90	90	90	90
50415	5	1	22	2	2016-03-21	2016-04-23	2016-05-23	2016-06-22	2016-07-24	2016-08-23	2016-09-25	2016-10-24	14.5	14.4	14.6	14	15.1	15.1	14.7	14.7	90	90	90	90	90	90	90	90
50416	5	1	53	1	2016-03-21	2016-04-23	2016-05-23	2016-06-22	2016-07-24	2016-08-23	2016-09-25	2016-10-24	18	17.7	16.9	17.5	17.9	17.2	17.9	17.4	90	90	90	90	90	90	90	90
50417	5	1	14	1	2016-03-21	2016-04-23	2016-05-23	2016-06-22	2016-07-24	2016-08-23	2016-09-25	2016-10-24	13.6	14.1	14	14.1	13.9	14.6	14.9	15.3	90	90	90	90	90	90	90	90
50418	5	1	37	1	2016-03-21	2016-04-23	2016-05-23	2016-06-22	2016-07-24	2016-08-23	2016-09-25	2016-10-24	14.8	14.7	14.8	15	15.6	15.3	15.6	15.7	90	90	90	90	90	90	90	90
50419	5	1	39	1	2016-03-21	2016-04-23	2016-05-23	2016-06-22	2016-07-24	2016-08-23	2016-09-25	2016-10-24	14.9	14.7	14.8	14.9	15.2	15.8	15.4	15.2	90	90	90	90	90	90	90	90
50420	5	1	57	1	2016-03-21	2016-04-23	2016-05-23	2016-06-22	2016-07-24	2016-08-23	2016-09-25	2016-10-24	14.6	13.6	13.1	13.7	14.3	14.6	14.9	14.4	90	90	90	90	90	90	90	90
140421	14	0	18	1	2016-03-22	2016-04-23	2016-05-23	2016-06-25	2016-07-25	2016-08-24	2016-09-26	2016-10-25	15.5	15.3	15.8	16	16.4	16.9	17	16.8	90	90	90	90	90	90	90	90
140422	14	0	7	1	2016-03-22	2016-04-23	2016-05-23	2016-06-25	2016-07-25	2016-08-24	2016-09-26	2016-10-25	12.8	13	13.7	14.7	14	15	15.7	15	90	90	90	90	90	90	90	90
140423	14	0	48	1	2016-03-22	2016-04-23	2016-05-23	2016-06-25	2016-07-25	2016-08-24	2016-09-26	2016-10-25	14.8	14.5	15	15.2	15.5	15.1	15	15.1	90	90	90	90	90	90	90	90
140424	14	0	36	2	2016-03-22	2016-04-23	2016-05-23	2016-06-25	2016-07-25	2016-08-24	2016-09-26	2016-10-25	13.9	12.6	12.1	13.4	13.5	13.3	14.1	14.3	90	90	90	90	90	90	90	90
140425	14	0	12	1	2016-03-22	2016-04-23	2016-05-23	2016-06-25	2016-07-25	2016-08-24	2016-09-26	2016-10-25	12	12	12.4	12.5	13.1	13.5	13.7	13.5	90	90	90	90	90	90	90	90
140426	14	0	48	2	2016-03-22	2016-04-23	2016-05-23	2016-06-25	2016-07-25	2016-08-24	2016-09-26	2016-10-25	15	15.3	15.5	15.1	15.2	15.1	15.2	16	90	90	90	90	90	90	90	90
140427	14	0	36	2	2016-03-22	2016-04-23	2016-05-23	2016-06-25	2016-07-25	2016-08-24	2016-09-26	2016-10-25	14	13.7	14.2	14	14.1	14.1			90	90	90	90	90	90	93	93
140428	14	0	46	2	2016-03-22	2016-04-23	2016-05-23	2016-06-25	2016-07-25	2016-08-24	2016-09-26	2016-10-25	16	15	15.3	15.8	15.9	15.5	16.2	15.9	90	90	90	90	90	90	90	90
140429	14	0	12	2	2016-03-22	2016-04-23	2016-05-23	2016-06-25	2016-07-25	2016-08-24	2016-09-26	2016-10-25	15	14.9	14.3	14.6	14.8	13.9	14.1	14.5	90	90	90	90	90	90	90	90
140430	14	0	48	2	2016-03-22	2016-04-23	2016-05-23	2016-06-25	2016-07-25	2016-08-24	2016-09-26	2016-10-25	15	14	13.9	14	14.1	15.4	14	14.4	90	90	90	90	90	90	90	90
140431	14	0	12	2	2016-03-22	2016-04-24	2016-05-23	2016-06-25	2016-07-25	2016-08-24	2016-09-26	2016-10-25	14.5	15	14.2	14.2	14.5	14.5	14.4	14.5	90	90	90	90	90	90	90	90
140432	14	0	48	2	2016-03-22	2016-04-24	2016-05-23	2016-06-25	2016-07-25	2016-08-24	2016-09-26	2016-10-25	13.8	13.5	12.8	13.6	14	14.4	14.2	13.7	90	90	90	90	90	90	90	90
140433	14	0	11	2	2016-03-22	2016-04-24	2016-05-23	2016-06-25	2016-07-25	2016-08-24	2016-09-26	2016-10-25	13.5	14	13.4	13.8	14	13.7	13.6	14.4	90	90	90	90	90	90	90	90
140434	14	0	36	1	2016-03-22	2016-04-24	2016-05-23	2016-06-25	2016-07-25	2016-08-24	2016-09-26	2016-10-25	15.5	14.9	14.8	14.9	15.2	15	15.5	16.1	90	90	90	90	90	90	90	90
140435	14	0	48	2	2016-03-22	2016-04-24	2016-05-23	2016-06-25	2016-07-25	2016-08-24	2016-09-26	2016-10-25	14.5	14.3	14.2	14.3	14.2	14.1	15.1	15	90	90	90	90	90	90	90	90
140436	14	0	9	1	2016-03-22	2016-04-24	2016-05-23	2016-06-25	2016-07-25	2016-08-24	2016-09-26	2016-10-25	13.5	14	13.3	13	13.5	13.3	13.6	13.7	90	90	90	90	90	90	90	90
140437	14	0	48	2	2016-03-22	2016-04-24	2016-05-23	2016-06-25	2016-07-25	2016-08-24	2016-09-26	2016-10-25	15	14.5	13.9	14.5	14.6	15.1	15	15.1	90	90	90	90	90	90	90	90
140438	14	0	42	2	2016-03-22	2016-04-24	2016-05-23	2016-06-25	2016-07-25	2016-08-24	2016-09-26	2016-10-25	15.7	15.5	15.2	15.1	15	15.4	16	16.1	90	90	90	90	90	90	90	90
140439	14	0	48	2	2016-03-22	2016-04-24	2016-05-23	2016-06-25	2016-07-25	2016-08-24	2016-09-26	2016-10-25	14	14	13.8	14	14.6	14.8	15.4	15.1	90	90	90	90	90	90	90	90
140440	14	0	48	2	2016-03-22	2016-04-24	2016-05-23	2016-06-25	2016-07-25	2016-08-24	2016-09-26	2016-10-25	16.5	16	15.5	15.9	16	16.3	16.9	17	90	90	90	90	90	90	90	90
130441	13	0	38	1	2016-03-22	2016-04-23	2016-05-23	2016-06-25	2016-07-25	2016-08-24	2016-09-26	2016-10-25	16.5	15.5	15.8	16	16.2	16.9	16.5	15.7	90	90	90	90	90	90	90	90
130442	13	0	36	1	2016-03-22	2016-04-23	2016-05-23	2016-06-25	2016-07-25	2016-08-24	2016-09-26	2016-10-25	15.3	14.6	14.9	14	14.7	15	14.3	14.6	90	90	90	90	90	90	90	90
130443	13	0	50	1	2016-03-22	2016-04-23	2016-05-23	2016-06-25	2016-07-25	2016-08-24	2016-09-26	2016-10-25	16	15.8	15.6	15.5	14.8	15.3	15.3	14.4	90	90	90	90	90	90	90	90
130444	13	0	37	2	2016-03-22	2016-04-23	2016-05-23	2016-06-25	2016-07-25	2016-08-24	2016-09-26	2016-10-25	16	15.2	14.6	15.1	15	14.7	14.6		90	90	90	90	90	90	90	95
130445	13	0	54	1	2016-03-22	2016-04-23	2016-05-23	2016-06-25	2016-07-25	2016-08-24	2016-09-26	2016-10-25	15.2	14.8	14.5	14.3	13.8	14.8	14.7	14.4	90	90	90	90	90	90	90	90
130446	13	0	36	1	2016-03-22	2016-04-23	2016-05-23	2016-06-25	2016-07-25	2016-08-24	2016-09-26	2016-10-25	15.5	15.1	14.8	14.5	14.6	14.9	14.5	13.9	90	90	90	90	90	90	90	90
130447	13	0	32	2	2016-03-22	2016-04-23	2016-05-23	2016-06-25	2016-07-25	2016-08-24	2016-09-26	2016-10-25	14.8	13.3	13.8	13.3	14	14.4	13.2	13.2	90	90	90	90	90	90	90	90
130448	13	0	40	1	2016-03-22	2016-04-23	2016-05-23	2016-06-25	2016-07-25	2016-08-24	2016-09-26	2016-10-25	14	15	14.7	14.8	15.1	15.2	14.4	14.5	90	90	90	90	90	90	90	90
130449	13	0	10	1	2016-03-22	2016-04-23	2016-05-23	2016-06-25	2016-07-25	2016-08-24	2016-09-26	2016-10-25	12.4								90	92	92	92	92	92	92	92
130450	13	0	12	1	2016-03-22	2016-04-23	2016-05-23	2016-06-25	2016-07-25	2016-08-24	2016-09-26	2016-10-25	13.5	11.6	10.9	10.8	11				90	90	90	90	90	92	92	92
130451	13	0	44	2	2016-03-22	2016-04-24	2016-05-23	2016-06-25	2016-07-25	2016-08-24	2016-09-26	2016-10-25	13.8	13			14.7	14.5	14.3	14.7	90	90	92	92	90	90	90	90
130452	13	0	7	1	2016-03-22	2016-04-24	2016-05-23	2016-06-25	2016-07-25	2016-08-24	2016-09-26	2016-10-25	12.7	12.8			13.1	12.6	13.1	13.5	90	90	92	92	90	90	90	90
130453	13	0	44	2	2016-03-22	2016-04-24	2016-05-23	2016-06-25	2016-07-25	2016-08-24	2016-09-26	2016-10-25	16	15.3	15.5	15.2	15.3	16	16.2	16.3	90	90	90	90	90	90	90	90
130454	13	0	10	2	2016-03-22	2016-04-24	2016-05-23	2016-06-25	2016-07-25	2016-08-24	2016-09-26	2016-10-25	14.4	14.4	14.8	14.1	14.2	14.7	14.8	14.7	90	90	90	90	90	90	90	90
130455	13	0	18	1	2016-03-22	2016-04-24	2016-05-23	2016-06-25	2016-07-25	2016-08-24	2016-09-26	2016-10-25	13.5	13.5	12.7	12.5	13.5	13.8	13.2	13.6	90	90	90	90	90	90	90	90
130456	13	0	44	2	2016-03-22	2016-04-24	2016-05-23	2016-06-25	2016-07-25	2016-08-24	2016-09-26	2016-10-25	15.2	15.4	15.5	15.3	15.8	16	15.7	15.2	90	90	90	90	90	90	90	90
130457	13	0	28	2	2016-03-22	2016-04-24	2016-05-23	2016-06-25	2016-07-25	2016-08-24	2016-09-26	2016-10-25	14.3	14	14.5	13.8	14.3	15	14.5	14.2	90	90	90	90	90	90	90	90
130458	13	0	54	1	2016-03-22	2016-04-24	2016-05-23	2016-06-25	2016-07-25	2016-08-24	2016-09-26	2016-10-25	16.5	15.6	15	14.2	14.5	14.6	14.3	14.1	90	90	90	90	90	90	90	90
130459	13	0	54	1	2016-03-22	2016-04-24	2016-05-23	2016-06-25	2016-07-25	2016-08-24	2016-09-26	2016-10-25	17.5	16.8	16.2	15	16	16.4	15.8	16.2	90	90	90	90	90	90	90	90
130460	13	0	48	2	2016-03-22	2016-04-24	2016-05-23	2016-06-25	2016-07-25	2016-08-24	2016-09-26	2016-10-25	13.5	13.5	13.4	13.5	13.7	13.9	14	13.5	90	90	90	90	90	90	90	90
170461	17	0	11	2	2016-03-22	2016-04-23	2016-05-23	2016-06-25	2016-07-25	2016-08-24	2016-09-26	2016-10-25	13.8	14.1	14	13.9	13.6	13.8			90	90	90	90	90	90	93	92
170462	17	0	50	1	2016-03-22	2016-04-23	2016-05-23	2016-06-25	2016-07-25	2016-08-24	2016-09-26	2016-10-25	14.2	14.3	14	14.1	14.5	14.3	14.1		90	90	90	90	90	90	90	92
170463	17	0	39	1	2016-03-22	2016-04-23	2016-05-23	2016-06-25	2016-07-25	2016-08-24	2016-09-26	2016-10-25	15.1	15.3	15.5	15.5				15.2	90	90	90	90	96	93	93	90
170464	17	0	44	2	2016-03-22	2016-04-23	2016-05-23	2016-06-25	2016-07-25	2016-08-24	2016-09-26	2016-10-25	14.7	14.3	14.6	14.4	14.6	14.3	14	14.4	90	90	90	90	90	90	90	90
170465	17	0	48	1	2016-03-22	2016-04-23	2016-05-23	2016-06-25	2016-07-25	2016-08-24	2016-09-26	2016-10-25	16.6	16.3				16.1	16.8	16.3	90	90	94	93	91	90	90	90
170466	17	0	48	1	2016-03-22	2016-04-23	2016-05-23	2016-06-25	2016-07-25	2016-08-24	2016-09-26	2016-10-25	17.4	17.1	17.2		17.5	17.1	17.5	17.6	90	90	90	91	90	90	90	90
170467	17	0	24	1	2016-03-22	2016-04-23	2016-05-23	2016-06-25	2016-07-25	2016-08-24	2016-09-26	2016-10-25	14.5	14.5	14.2	13.5	14	14.4	14.6		90	90	90	90	90	90	90	92
170468	17	0	24	1	2016-03-22	2016-04-23	2016-05-23	2016-06-25	2016-07-25	2016-08-24	2016-09-26	2016-10-25	14.8	14.5	14	14.4	14.5	14.4			90	90	90	90	90	90	93	92
170469	17	0	48	2	2016-03-22	2016-04-23	2016-05-23	2016-06-25	2016-07-25	2016-08-24	2016-09-26	2016-10-25	17.4	17.1	17.3	16.9	17	17.5	17.1		90	90	90	90	90	90	90	92
170470	17	0	54	1	2016-03-22	2016-04-23	2016-05-23	2016-06-25	2016-07-25	2016-08-24	2016-09-26	2016-10-25	13.8	14.5	14.6	14.1	14.4	14.1	14.3		90	90	90	90	90	90	90	92
170471	17	0	36	1	2016-03-22	2016-04-24	2016-05-23	2016-06-25	2016-07-25	2016-08-24	2016-09-26	2016-10-25	15.3	15.7	15.9	15.3	15.7	15.8	16		90	90	90	90	90	90	90	92
170472	17	0	12	1	2016-03-22	2016-04-24	2016-05-23	2016-06-25	2016-07-25	2016-08-24	2016-09-26	2016-10-25	14.4	14.6	14.7	14	14.4	14.7	15.5		90	90	90	90	90	90	90	92
170473	17	0	36	2	2016-03-22	2016-04-24	2016-05-23	2016-06-25	2016-07-25	2016-08-24	2016-09-26	2016-10-25	14.4	15.7	15.4	15	15.2	15.3	15.1		90	90	90	90	90	90	90	92
170474	17	0	24	1	2016-03-22	2016-04-24	2016-05-23	2016-06-25	2016-07-25	2016-08-24	2016-09-26	2016-10-25	16.8	16.7	15.7	14.4	14.6	15	15.5		90	90	90	90	90	90	90	92
170475	17	0	16	2	2016-03-22	2016-04-24	2016-05-23	2016-06-25	2016-07-25	2016-08-24	2016-09-26	2016-10-25	14.5	15	14.5	14.6	14.9	14.6	15		90	90	90	90	90	90	90	92
170476	17	0	25	2	2016-03-22	2016-04-24	2016-05-23	2016-06-25	2016-07-25	2016-08-24	2016-09-26	2016-10-25	15.7	15.1	14.9	14.4	15	15.5	16		90	90	90	90	90	90	90	92
170477	17	0	29	1	2016-03-22	2016-04-24	2016-05-23	2016-06-25	2016-07-25	2016-08-24	2016-09-26	2016-10-25	15.5	15.3	15.2	14.3	14.5	14.6	15		90	90	90	90	90	90	90	92
170478	17	0	46	2	2016-03-22	2016-04-24	2016-05-23	2016-06-25	2016-07-25	2016-08-24	2016-09-26	2016-10-25	15.9	15.9	15.7	16	16.1	16.3	15.9		90	90	90	90	90	90	90	92
170479	17	0	54	2	2016-03-22	2016-04-24	2016-05-23	2016-06-25	2016-07-25	2016-08-24	2016-09-26	2016-10-25	17	17.1	17.3	16.5	16.6	16.7	16.8	16	90	90	90	90	90	90	90	90
170480	17	0	29	2	2016-03-22	2016-04-24	2016-05-23	2016-06-25	2016-07-25	2016-08-24	2016-09-26	2016-10-25	14.4	14.9	15.1	14.4	14.1	13.9	14	14.1	90	90	90	90	90	90	90	90
40481	4	1	9	1	2016-03-22	2016-04-23	2016-05-23	2016-06-25	2016-07-25	2016-08-24	2016-09-26	2016-10-25	15.1	15.5	14.4	14.1	14.9				90	90	90	90	90	93	93	92
40482	4	1	38	2	2016-03-22	2016-04-23	2016-05-23	2016-06-25	2016-07-25	2016-08-24	2016-09-26	2016-10-25	14.9	14.4	14.8	14.3	14.8	14.5	14.6		90	90	90	90	90	90	90	92
40483	4	1	41	1	2016-03-22	2016-04-23	2016-05-23	2016-06-25	2016-07-25	2016-08-24	2016-09-26	2016-10-25	16.9	16.6	16.1	16.3	16.6	15.6	15.9	16.4	90	90	90	90	90	90	90	90
40484	4	1	16	2	2016-03-22	2016-04-23	2016-05-23	2016-06-25	2016-07-25	2016-08-24	2016-09-26	2016-10-25	11.9	11.9	11.5	13.3	12.6	11.7	12	12	90	90	90	90	90	90	90	90
40485	4	1	10	2	2016-03-22	2016-04-23	2016-05-23	2016-06-25	2016-07-25	2016-08-24	2016-09-26	2016-10-25	14.6	14.5	14.6	14.9	14.7	15	14.4	14.7	90	90	90	90	90	90	90	90
40486	4	1	48	1	2016-03-22	2016-04-23	2016-05-23	2016-06-25	2016-07-25	2016-08-24	2016-09-26	2016-10-25	14.3								90	93	93	93	93	93	93	93
40487	4	1	24	2	2016-03-22	2016-04-23	2016-05-23	2016-06-25	2016-07-25	2016-08-24	2016-09-26	2016-10-25	15.1	15.6	14.4	15	15.7	15.4	15.5	15	90	90	90	90	90	90	90	90
40488	4	1	50	1	2016-03-22	2016-04-23	2016-05-23	2016-06-25	2016-07-25	2016-08-24	2016-09-26	2016-10-25	15.4	15.1	14.8	14.9	15.2	14.8	14.9	14.7	90	90	90	90	90	90	90	90
40489	4	1	48	2	2016-03-22	2016-04-23	2016-05-23	2016-06-25	2016-07-25	2016-08-24	2016-09-26	2016-10-25	16.7	15.6	14.5	15.4	15.4	15.7	15.9	15.6	90	90	90	90	90	90	90	90
40490	4	1	8	1	2016-03-22	2016-04-23	2016-05-23	2016-06-25	2016-07-25	2016-08-24	2016-09-26	2016-10-25	13.5	13.4	13.5	14.4	13.7	13	12.6	12.7	90	90	90	90	90	90	90	90
40491	4	1	36	2	2016-03-22	2016-04-24	2016-05-23	2016-06-25	2016-07-25	2016-08-24	2016-09-26	2016-10-25	16.3	15.2	15.5	15.9	15.3	14.5	14.6	15.2	90	90	90	90	90	90	90	90
40492	4	1	18	1	2016-03-22	2016-04-24	2016-05-23	2016-06-25	2016-07-25	2016-08-24	2016-09-26	2016-10-25	11.8	11.9	11.6	11.6	11.2	11.3	11.7	12.3	90	90	90	90	90	90	90	90
40493	4	1	15	2	2016-03-22	2016-04-24	2016-05-23	2016-06-25	2016-07-25	2016-08-24	2016-09-26	2016-10-25	14.9		13.3	13.3	12.5	13.2	13.9	14	90	91	90	90	90	90	90	90
40494	4	1	30	2	2016-03-22	2016-04-24	2016-05-23	2016-06-25	2016-07-25	2016-08-24	2016-09-26	2016-10-25	15.2	15.1	14.3	14.9	14.8	15.1	15	14.9	90	90	90	90	90	90	90	90
40495	4	1	48	2	2016-03-22	2016-04-24	2016-05-23	2016-06-25	2016-07-25	2016-08-24	2016-09-26	2016-10-25	15.1	14.6	14.2	13.8	14.4	14.5	14.2	14.9	90	90	90	90	90	90	90	90
40496	4	1	48	2	2016-03-22	2016-04-24	2016-05-23	2016-06-25	2016-07-25	2016-08-24	2016-09-26	2016-10-25	14.4	13.7	14	13.9	14.1	14.7	14.9	14.7	90	90	90	90	90	90	90	90
40497	4	1	33	2	2016-03-22	2016-04-24	2016-05-23	2016-06-25	2016-07-25	2016-08-24	2016-09-26	2016-10-25	14.3	13.6	13.6	13.3	13.1	13	13.6	14	90	90	90	90	90	90	90	90
40498	4	1	8	1	2016-03-22	2016-04-24	2016-05-23	2016-06-25	2016-07-25	2016-08-24	2016-09-26	2016-10-25	13.7	14.7	14.1	14.4	14.5	14.9	14.4	14.3	90	90	90	90	90	90	90	90
40499	4	1	52	1	2016-03-22	2016-04-24	2016-05-23	2016-06-25	2016-07-25	2016-08-24	2016-09-26	2016-10-25	16.3	15.6	15.5	15.5	15.4	15.1	15.5	15.1	90	90	90	90	90	90	90	90
40500	4	1	38	2	2016-03-22	2016-04-24	2016-05-23	2016-06-25	2016-07-25	2016-08-24	2016-09-26	2016-10-25	13.1	12.4			15.3	12.7			90	90	91	94	90	90	93	94
30501	3	1	30	2	2016-03-22	2016-04-23	2016-05-23	2016-06-25	2016-07-25	2016-08-24	2016-09-26	2016-10-25	15.5	15.7	15.6	15.1	16	15.5	16.4	15.5	90	90	90	90	90	90	90	90
30502	3	1	59	1	2016-03-22	2016-04-23	2016-05-23	2016-06-25	2016-07-25	2016-08-24	2016-09-26	2016-10-25	15.4	15.5	15.1	15.6	15.7	15.8	16.1	15.4	90	90	90	90	90	90	90	90
30503	3	1	18	1	2016-03-22	2016-04-23	2016-05-23	2016-06-25	2016-07-25	2016-08-24	2016-09-26	2016-10-25	12.9	13.5	13.4	13					90	90	90	90	96	96	96	92
30504	3	1	12	1	2016-03-22	2016-04-23	2016-05-23	2016-06-25	2016-07-25	2016-08-24	2016-09-26	2016-10-25	13.6	13	13.2		13.9	14	13.7		90	90	90	91	90	90	90	93
30505	3	1	24	2	2016-03-22	2016-04-23	2016-05-23	2016-06-25	2016-07-25	2016-08-24	2016-09-26	2016-10-25	15.3	15.3	14.8	15.5	14	14.5	14.7		90	90	90	90	90	90	90	93
30506	3	1	24	2	2016-03-22	2016-04-23	2016-05-23	2016-06-25	2016-07-25	2016-08-24	2016-09-26	2016-10-25	12.5	12.7	12.5	11.6	11.8	11.5	12.6	12.4	90	90	90	90	90	90	90	90
30507	3	1	21	1	2016-03-22	2016-04-23	2016-05-23	2016-06-25	2016-07-25	2016-08-24	2016-09-26	2016-10-25	13.1	12.6	12.5	13.2	13.8	13.6	13.5	13.5	90	90	90	90	90	90	90	90
30508	3	1	59	1	2016-03-22	2016-04-23	2016-05-23	2016-06-25	2016-07-25	2016-08-24	2016-09-26	2016-10-25	13.5	13.5	14	14.1	14	14.2	13.2	13.6	90	90	90	90	90	90	90	90
30509	3	1	24	1	2016-03-22	2016-04-23	2016-05-23	2016-06-25	2016-07-25	2016-08-24	2016-09-26	2016-10-25	14.5	16.9	15.9	16.5	17.1	16.5	17.6	16.2	90	90	90	90	90	90	90	90
30510	3	1	36	2	2016-03-22	2016-04-23	2016-05-23	2016-06-25	2016-07-25	2016-08-24	2016-09-26	2016-10-25	14.9	15.2	15.5	15.5	15.8	15.5	16		90	90	90	90	90	90	90	93
30511	3	1	24	2	2016-03-22	2016-04-24	2016-05-23	2016-06-25	2016-07-25	2016-08-24	2016-09-26	2016-10-25	14.1	15.5	14.9	15	16	15	15.4		90	90	90	90	90	90	90	93
30512	3	1	36	2	2016-03-22	2016-04-24	2016-05-23	2016-06-25	2016-07-25	2016-08-24	2016-09-26	2016-10-25	11.9	16.5	16.2	16.6	15.5	15.6	16.5	16	90	90	90	90	90	90	90	90
30513	3	1	59	2	2016-03-22	2016-04-24	2016-05-23	2016-06-25	2016-07-25	2016-08-24	2016-09-26	2016-10-25	15.1	15.5	15.1	15.7	15.5	14.6	15.5	14.8	90	90	90	90	90	90	90	90
30514	3	1	12	1	2016-03-22	2016-04-24	2016-05-23	2016-06-25	2016-07-25	2016-08-24	2016-09-26	2016-10-25	13.2	13.1	12.7	13.5	13.8	14	14.2	14	90	90	90	90	90	90	90	90
30515	3	1	36	2	2016-03-22	2016-04-24	2016-05-23	2016-06-25	2016-07-25	2016-08-24	2016-09-26	2016-10-25	15.2	14.1	14.6	14.8	14.9	16			90	90	90	90	90	90	93	93
30516	3	1	24	1	2016-03-22	2016-04-24	2016-05-23	2016-06-25	2016-07-25	2016-08-24	2016-09-26	2016-10-25	16.8	16.3	16.1	15.5	15.1	16	16.1	15.8	90	90	90	90	90	90	90	90
30517	3	1	48	2	2016-03-22	2016-04-24	2016-05-23	2016-06-25	2016-07-25	2016-08-24	2016-09-26	2016-10-25	15.1	15.1	15	15.6	14.7	15.4	15.3	16	90	90	90	90	90	90	90	90
30518	3	1	24	1	2016-03-22	2016-04-24	2016-05-23	2016-06-25	2016-07-25	2016-08-24	2016-09-26	2016-10-25	12.3								90	95	95	95	95	95	95	95
30519	3	1	12	2	2016-03-22	2016-04-24	2016-05-23	2016-06-25	2016-07-25	2016-08-24	2016-09-26	2016-10-25	11.1	13	13.1	13	14.4	13.2	13.3	13.2	90	90	90	90	90	90	90	90
30520	3	1	36	2	2016-03-22	2016-04-24	2016-05-23	2016-06-25	2016-07-25	2016-08-24	2016-09-26	2016-10-25	12.2	13.8	13.2	13.3	13.4	13	13.2	13	90	90	90	90	90	90	90	90
50521	5	1	51	1	2016-03-22	2016-04-23	2016-05-23	2016-06-25	2016-07-25	2016-08-24	2016-09-26	2016-10-25	12.9	12.2	11.9	12.7	12.4	12.3	12.4	12.4	90	90	90	90	90	90	90	90
50522	5	1	21	2	2016-03-22	2016-04-23	2016-05-23	2016-06-25	2016-07-25	2016-08-24	2016-09-26	2016-10-25	13.7	14.1	13.7	14.2	13.7	14.2	14.2	14.2	90	90	90	90	90	90	90	90
50523	5	1	42	1	2016-03-22	2016-04-23	2016-05-23	2016-06-25	2016-07-25	2016-08-24	2016-09-26	2016-10-25	13.5	13.6	14.3	14.6	14.4	14.1	13.3	14.1	90	90	90	90	90	90	90	90
50524	5	1	41	2	2016-03-22	2016-04-23	2016-05-23	2016-06-25	2016-07-25	2016-08-24	2016-09-26	2016-10-25	15.1	15.3	15.7	15.7	15.6	15.3	14.3	16.2	90	90	90	90	90	90	90	90
50525	5	1	53	2	2016-03-22	2016-04-23	2016-05-23	2016-06-25	2016-07-25	2016-08-24	2016-09-26	2016-10-25	15.3	15.3	14.4	15.2	15.2	15.1	14.2	15.2	90	90	90	90	90	90	90	90
50526	5	1	31	2	2016-03-22	2016-04-23	2016-05-23	2016-06-25	2016-07-25	2016-08-24	2016-09-26	2016-10-25	15.2		14.6	14.3	14.8		15.3	14.7	90	91	90	90	90	91	90	90
50527	5	1	17	2	2016-03-22	2016-04-23	2016-05-23	2016-06-25	2016-07-25	2016-08-24	2016-09-26	2016-10-25	14.2	15.2	15.6	14.7	15.2	15.2	15.5	15	90	90	90	90	90	90	90	90
100528	10	1	8	2	2016-03-22	2016-04-23	2016-05-23	2016-06-25	2016-07-25	2016-08-24	2016-09-26	2016-10-25	12.4	12.6	13.2	13.4	13	11.8	12.4	13.3	90	90	90	90	90	90	90	90
100529	10	1	40	1	2016-03-22	2016-04-23	2016-05-23	2016-06-25	2016-07-25	2016-08-24	2016-09-26	2016-10-25	14.9	14.7	13.4	13.9	14.7	14.9	14.5	15.4	90	90	90	90	90	90	90	90
100530	10	1	54	1	2016-03-22	2016-04-23	2016-05-23	2016-06-25	2016-07-25	2016-08-24	2016-09-26	2016-10-25	15.1	15.1	14.4	14.6	15.6	15.6	15.6	15.9	90	90	90	90	90	90	90	90
100531	10	1	43	1	2016-03-22	2016-04-24	2016-05-23	2016-06-25	2016-07-25	2016-08-24	2016-09-26	2016-10-25	16.7	16.6	16.6	16.6	16.8	16.1	15.3	16.4	90	90	90	90	90	90	90	90
100532	10	1	57	2	2016-03-22	2016-04-24	2016-05-23	2016-06-25	2016-07-25	2016-08-24	2016-09-26	2016-10-25	15.2	15.2	14.3	15.2	14.8	14.8	14.4	15.4	90	90	90	90	90	90	90	90
100533	10	1	27	2	2016-03-22	2016-04-24	2016-05-23	2016-06-25	2016-07-25	2016-08-24	2016-09-26	2016-10-25	14.4	14	14.7	14.3	14.1	12.8	12.4	13.7	90	90	90	90	90	90	90	90
100534	10	1	10	1	2016-03-22	2016-04-24	2016-05-23	2016-06-25	2016-07-25	2016-08-24	2016-09-26	2016-10-25	13.2	12.2	12.4	12.4	12.7	12.7	13.2	12.3	90	90	90	90	90	90	90	90
100535	10	1	44	2	2016-03-22	2016-04-24	2016-05-23	2016-06-25	2016-07-25	2016-08-24	2016-09-26	2016-10-25	15.9	16.7	15.2	15.2	14.9	14.9	14.5	15.2	90	90	90	90	90	90	90	90
100536	10	1	29	2	2016-03-22	2016-04-24	2016-05-23	2016-06-25	2016-07-25	2016-08-24	2016-09-26	2016-10-25	13.3	14.2	13.2	13.6	14.1	14	14.2	14.4	90	90	90	90	90	90	90	90
100537	10	1	20	1	2016-03-22	2016-04-24	2016-05-23	2016-06-25	2016-07-25	2016-08-24	2016-09-26	2016-10-25	12.9	13.5	13.4	12.4	13.4	13.5	14.2	13.8	90	90	90	90	90	90	90	90
100538	10	1	40	1	2016-03-22	2016-04-24	2016-05-23	2016-06-25	2016-07-25	2016-08-24	2016-09-26	2016-10-25	15.6	15.1	14.5	14.4	14.7	15.2	15.4	15.7	90	90	90	90	90	90	90	90
100539	10	1	34	2	2016-03-22	2016-04-24	2016-05-23	2016-06-25	2016-07-25	2016-08-24	2016-09-26	2016-10-25	14.3	13.3	13.7	13.4	14.4	14.6	14.2	14.5	90	90	90	90	90	90	90	90
100540	10	1	42	1	2016-03-22	2016-04-24	2016-05-23	2016-06-25	2016-07-25	2016-08-24	2016-09-26	2016-10-25	12.2	11.6	12.4		14.4	13.9	13.5	13.9	90	90	90	91	90	90	90	90
140541	14	0	19	1	2016-03-23	2016-04-24	2016-05-24	2016-06-25	2016-07-26	2016-08-27	2016-09-27	2016-10-26	12.5	12.7	12.6	12.2	12.7	13	13.2	13	90	90	90	90	90	90	90	90
140542	14	0	54	1	2016-03-23	2016-04-24	2016-05-24	2016-06-25	2016-07-26	2016-08-27	2016-09-27	2016-10-26	15	15	15.3	15	15.1	15.5	15.6	15.7	90	90	90	90	90	90	90	90
140543	14	0	21	2	2016-03-23	2016-04-24	2016-05-24	2016-06-25	2016-07-26	2016-08-27	2016-09-27	2016-10-26	14	14	13	13.9	15.1	15	14.6		90	90	90	90	90	90	90	94
140544	14	0	42	1	2016-03-23	2016-04-24	2016-05-24	2016-06-25	2016-07-26	2016-08-27	2016-09-27	2016-10-26	14.2	13.5	13.4	13.5	14	14.4	14.7		90	90	90	90	90	90	90	94
140545	14	0	21	2	2016-03-23	2016-04-24	2016-05-24	2016-06-25	2016-07-26	2016-08-27	2016-09-27	2016-10-26	13	15.5		15.6					90	90	93	90	91	92	92	92
140546	14	0	10	2	2016-03-23	2016-04-24	2016-05-24	2016-06-25	2016-07-26	2016-08-27	2016-09-27	2016-10-26	13.2	13.5							90	90	92	92	92	92	92	92
140547	14	0	54	1	2016-03-23	2016-04-24	2016-05-24	2016-06-25	2016-07-26	2016-08-27	2016-09-27	2016-10-26	15.3	15.2	15.2	15.1	15	15	15.1	15.5	90	90	90	90	90	90	90	90
110548	11	0	44	1	2016-03-23	2016-04-24	2016-05-24	2016-06-25	2016-07-26	2016-08-27	2016-09-27	2016-10-26	14	13.9	13.8	13.6	14.3	14.5	14.7	14.2	90	90	90	90	90	90	90	90
110549	11	0	54	1	2016-03-23	2016-04-24	2016-05-24	2016-06-25	2016-07-26	2016-08-27	2016-09-27	2016-10-26	16	16	16.1	15.9	16.4	16.4	17	16.9	90	90	90	90	90	90	90	90
110550	11	0	13	2	2016-03-23	2016-04-24	2016-05-24	2016-06-25	2016-07-26	2016-08-27	2016-09-27	2016-10-26	13	13	13.3	12.2	13	12.7	13.1	13.9	90	90	90	90	90	90	90	90
110551	11	0	27	1	2016-03-23	2016-04-24	2016-05-24	2016-06-25	2016-07-26	2016-08-27	2016-09-27	2016-10-26	14.5	14.1	14.2	14.5	14.6	14.8	14.9	15	90	90	90	90	90	90	90	90
110552	11	0	40	2	2016-03-23	2016-04-24	2016-05-24	2016-06-25	2016-07-26	2016-08-27	2016-09-27	2016-10-26	13.8	13	13.4	14.6	14.2	14.5	14.2	14.3	90	90	90	90	90	90	90	90
110553	11	0	54	1	2016-03-23	2016-04-24	2016-05-24	2016-06-25	2016-07-26	2016-08-27	2016-09-27	2016-10-26	15.6	15	15.2	15.6	15.1	15.1	15.3	15.1	90	90	90	90	90	90	90	90
110554	11	0	24	1	2016-03-23	2016-04-24	2016-05-24	2016-06-25	2016-07-26	2016-08-27	2016-09-27	2016-10-26	12	12	12.1	13	14.2	13.5	13.8	13.9	90	90	90	90	90	90	90	90
110555	11	0	13	2	2016-03-23	2016-04-24	2016-05-24	2016-06-25	2016-07-26	2016-08-27	2016-09-27	2016-10-26	12	12	12.4	12	11.7	12.6	13	13.1	90	90	90	90	90	90	90	90
110556	11	0	30	1	2016-03-23	2016-04-26	2016-05-24	2016-06-25	2016-07-26	2016-08-27	2016-09-27	2016-10-26	13.6	13.4	13.1	12.2	13	12.5	12.7	13.5	90	90	90	90	90	90	90	90
110557	11	0	6	2	2016-03-23	2016-04-26	2016-05-24	2016-06-25	2016-07-26	2016-08-27	2016-09-27	2016-10-26	11.9	13.3	12.2						90	90	90	91	96	92	92	92
110558	11	0	36	2	2016-03-23	2016-04-26	2016-05-24	2016-06-25	2016-07-26	2016-08-27	2016-09-27	2016-10-26	15.8	16				16		16.1	90	90	93	93	93	90	93	90
110559	11	0	8	2	2016-03-23	2016-04-26	2016-05-24	2016-06-25	2016-07-26	2016-08-27	2016-09-27	2016-10-26	14.9	14.6	14.2	14.5	14.6	14.4	14.5	14.3	90	90	90	90	90	90	90	90
110560	11	0	24	1	2016-03-23	2016-04-26	2016-05-24	2016-06-25	2016-07-26	2016-08-27	2016-09-27	2016-10-26	15	15.1	14.9	14.2	15	15.8	15.6	15.8	90	90	90	90	90	90	90	90
130561	13	0	39	1	2016-03-23	2016-04-24	2016-05-24	2016-06-25	2016-07-26	2016-08-27	2016-09-27	2016-10-26	15	14.6	14.9	15	15.8	16	16.1	16.2	90	90	90	90	90	90	90	90
130562	13	0	21	1	2016-03-23	2016-04-24	2016-05-24	2016-06-25	2016-07-26	2016-08-27	2016-09-27	2016-10-26	12.5	12	12.8	12.3	13.5	14.5	14.3	15.1	90	90	90	90	90	90	90	90
130563	13	0	46	1	2016-03-23	2016-04-24	2016-05-24	2016-06-25	2016-07-26	2016-08-27	2016-09-27	2016-10-26	16.3								90	95	95	95	95	95	95	95
130564	13	0	11	1	2016-03-23	2016-04-24	2016-05-24	2016-06-25	2016-07-26	2016-08-27	2016-09-27	2016-10-26	12.2	12.7	13	12.3	13			12	90	90	90	90	90	93	93	90
130565	13	0	20	2	2016-03-23	2016-04-24	2016-05-24	2016-06-25	2016-07-26	2016-08-27	2016-09-27	2016-10-26	13.1	12.6	12.7	12.5	13.7	13.4	13.2	14.1	90	90	90	90	90	90	90	90
130566	13	0	45	2	2016-03-23	2016-04-24	2016-05-24	2016-06-25	2016-07-26	2016-08-27	2016-09-27	2016-10-26	16.2	15.5	15.3	14.4	14.8	15.5	15.4	16	90	90	90	90	90	90	90	90
130567	13	0	10	1	2016-03-23	2016-04-24	2016-05-24	2016-06-25	2016-07-26	2016-08-27	2016-09-27	2016-10-26	13.8	13.8	14	13	12.8	13.7	12.7	13.2	90	90	90	90	90	90	90	90
130568	13	0	48	2	2016-03-23	2016-04-24	2016-05-24	2016-06-25	2016-07-26	2016-08-27	2016-09-27	2016-10-26	13.8	13.7	13.6	16	13.8	14	14.1	14	90	90	90	90	90	90	90	90
130569	13	0	42	1	2016-03-23	2016-04-24	2016-05-24	2016-06-25	2016-07-26	2016-08-27	2016-09-27	2016-10-26	17		16.5	16.2	16	16.3	15.7	15.1	90	91	90	90	90	90	90	90
130570	13	0	20	1	2016-03-23	2016-04-24	2016-05-24	2016-06-25	2016-07-26	2016-08-27	2016-09-27	2016-10-26	15.1	14.4	13.9	14	14.2	14.7	14.5	14.6	90	90	90	90	90	90	90	90
130571	13	0	39	1	2016-03-23	2016-04-24	2016-05-24	2016-06-25	2016-07-26	2016-08-27	2016-09-27	2016-10-26	15.4	14.2	14.3	13.5	13.9	14.4	14.6	15.1	90	90	90	90	90	90	90	90
130572	13	0	34	2	2016-03-23	2016-04-24	2016-05-24	2016-06-25	2016-07-26	2016-08-27	2016-09-27	2016-10-26	11.4	11	11.7	11.8	11	11.2	11.5	12.2	90	90	90	90	90	90	90	90
130573	13	0	21	2	2016-03-23	2016-04-24	2016-05-24	2016-06-25	2016-07-26	2016-08-27	2016-09-27	2016-10-26	11.3	12.4	12.5	12.4	11.4	10.1	8.5	9.1	90	90	90	90	90	90	90	90
130574	13	0	42	2	2016-03-23	2016-04-24	2016-05-24	2016-06-25	2016-07-26	2016-08-27	2016-09-27	2016-10-26	16		16.2	15.2	15.3	15	14.5	14.9	90	91	90	90	90	90	90	90
130575	13	0	47	1	2016-03-23	2016-04-24	2016-05-24	2016-06-25	2016-07-26	2016-08-27	2016-09-27	2016-10-26	15	14.5	14.4	14.3	14.6	15	14.7	14.6	90	90	90	90	90	90	90	90
130576	13	0	11	2	2016-03-23	2016-04-26	2016-05-24	2016-06-25	2016-07-26	2016-08-27	2016-09-27	2016-10-26	14.8	13	12.9	13.5	13.1	14	14.2		90	90	90	90	90	90	90	93
130577	13	0	46	2	2016-03-23	2016-04-26	2016-05-24	2016-06-25	2016-07-26	2016-08-27	2016-09-27	2016-10-26	14.6	13.9	13.7	12.8	13	13.1	14	13.9	90	90	90	90	90	90	90	90
130578	13	0	42	2	2016-03-23	2016-04-26	2016-05-24	2016-06-25	2016-07-26	2016-08-27	2016-09-27	2016-10-26	15.2	14.5	13.9	14.5	14.7	14.5	14.2	14.5	90	90	90	90	90	90	90	90
130579	13	0	45	2	2016-03-23	2016-04-26	2016-05-24	2016-06-25	2016-07-26	2016-08-27	2016-09-27	2016-10-26	16.2	16.1	15.7	16.2	15.8	16	16.5	16	90	90	90	90	90	90	90	90
130580	13	0	34	2	2016-03-23	2016-04-26	2016-05-24	2016-06-25	2016-07-26	2016-08-27	2016-09-27	2016-10-26	15	13.7	14.1	14	13.7	14.2	14.3	14.2	90	90	90	90	90	90	90	90
170581	17	0	14	2	2016-03-23	2016-04-24	2016-05-24	2016-06-25	2016-07-26	2016-08-27	2016-09-27	2016-10-26	12.8	13.2		13.3	13.4	13.3	13.2	13.5	90	90	93	90	90	90	90	90
170582	17	0	28	2	2016-03-23	2016-04-24	2016-05-24	2016-06-25	2016-07-26	2016-08-27	2016-09-27	2016-10-26	14.3	15	15.4						90	90	90	91	92	92	92	92
170583	17	0	46	1	2016-03-23	2016-04-24	2016-05-24	2016-06-25	2016-07-26	2016-08-27	2016-09-27	2016-10-26	16.9	16.5	16.3	16	16.1	16.3	16.5	16.6	90	90	90	90	90	90	90	90
170584	17	0	33	2	2016-03-23	2016-04-24	2016-05-24	2016-06-25	2016-07-26	2016-08-27	2016-09-27	2016-10-26	13.7	14.1	13.8	13.8	13.5	13.2	13.6	13.8	90	90	90	90	90	90	90	90
170585	17	0	34	2	2016-03-23	2016-04-24	2016-05-24	2016-06-25	2016-07-26	2016-08-27	2016-09-27	2016-10-26	13.9	14	13.8	12.7	13.2	13.4	13.5	14.4	90	90	90	90	90	90	90	90
170586	17	0	32	1	2016-03-23	2016-04-24	2016-05-24	2016-06-25	2016-07-26	2016-08-27	2016-09-27	2016-10-26	15.6	16	15.5	15	15.2		15.4	14.9	90	90	90	90	90	93	90	90
170587	17	0	39	2	2016-03-23	2016-04-24	2016-05-24	2016-06-25	2016-07-26	2016-08-27	2016-09-27	2016-10-26	15	15.3	15.7	15.3	15.1	14.8	15		90	90	90	90	90	90	90	92
170588	17	0	22	1	2016-03-23	2016-04-24	2016-05-24	2016-06-25	2016-07-26	2016-08-27	2016-09-27	2016-10-26	13	12.7	13.3	13.6	13.5	13.9	14	14.5	90	90	90	90	90	90	90	90
170589	17	0	42	2	2016-03-23	2016-04-24	2016-05-24	2016-06-25	2016-07-26	2016-08-27	2016-09-27	2016-10-26	14.8	14.9	14.5	14.4	14.5	14.6	14.8	14.6	90	90	90	90	90	90	90	90
170590	17	0	11	2	2016-03-23	2016-04-24	2016-05-24	2016-06-25	2016-07-26	2016-08-27	2016-09-27	2016-10-26	13.3	13.5	13.2	13	13.1	13	12.9		90	90	90	90	90	90	90	93
170591	17	0	23	1	2016-03-23	2016-04-24	2016-05-24	2016-06-25	2016-07-26	2016-08-27	2016-09-27	2016-10-26	15	14.5	14.2	15	15.2	15.4	15.2	15.9	90	90	90	90	90	90	90	90
170592	17	0	9	1	2016-03-23	2016-04-24	2016-05-24	2016-06-25	2016-07-26	2016-08-27	2016-09-27	2016-10-26	12.7	12.6	12.5	11.8	11.5	12.4		10.5	90	90	90	90	90	90	97	90
170593	17	0	19	1	2016-03-23	2016-04-24	2016-05-24	2016-06-25	2016-07-26	2016-08-27	2016-09-27	2016-10-26	13.6	13.9	14.1	14.2	14	13.9	14.2	13.6	90	90	90	90	90	90	90	90
170594	17	0	39	1	2016-03-23	2016-04-24	2016-05-24	2016-06-25	2016-07-26	2016-08-27	2016-09-27	2016-10-26	15.5		14.8	15.4	15.9	15.7			90	96	90	90	90	90	93	92
170595	17	0	30	2	2016-03-23	2016-04-24	2016-05-24	2016-06-25	2016-07-26	2016-08-27	2016-09-27	2016-10-26	14.5	13.3	14	14.3	14.5	14.9	15		90	90	90	90	90	90	90	92
170596	17	0	22	2	2016-03-23	2016-04-26	2016-05-24	2016-06-25	2016-07-26	2016-08-27	2016-09-27	2016-10-26	13.9	13.4	13.3						90	90	90	91	92	92	92	92
170597	17	0	41	1	2016-03-23	2016-04-26	2016-05-24	2016-06-25	2016-07-26	2016-08-27	2016-09-27	2016-10-26	14.8	14.6	14.8	14.6		14.9	14.1		90	90	90	90	93	90	90	92
170598	17	0	34	2	2016-03-23	2016-04-26	2016-05-24	2016-06-25	2016-07-26	2016-08-27	2016-09-27	2016-10-26	15.4	15.2							90	90	93	93	93	93	93	93
170599	17	0	48	1	2016-03-23	2016-04-26	2016-05-24	2016-06-25	2016-07-26	2016-08-27	2016-09-27	2016-10-26	16.5	16.3	16.1	16.3	16	16.1	16	15.2	90	90	90	90	90	90	90	90
170600	17	0	42	1	2016-03-23	2016-04-26	2016-05-24	2016-06-25	2016-07-26	2016-08-27	2016-09-27	2016-10-26	15.4	15.2	15.4	15.5	15.7	15.9	15.6	15.2	90	90	90	90	90	90	90	90
40601	4	1	40	1	2016-03-23	2016-04-24	2016-05-24	2016-06-25	2016-07-26	2016-08-27	2016-09-27	2016-10-26	15.2	16.3	16.4	15.6	15.9		15.6	15.8	90	90	90	90	90	93	90	90
40602	4	1	38	2	2016-03-23	2016-04-24	2016-05-24	2016-06-25	2016-07-26	2016-08-27	2016-09-27	2016-10-26	15.7								90	91	91	92	92	92	92	92
40603	4	1	31	2	2016-03-23	2016-04-24	2016-05-24	2016-06-25	2016-07-26	2016-08-27	2016-09-27	2016-10-26	12.3	12.6	11.9	11.5	12	12.1	12.2	12.3	90	90	90	90	90	90	90	90
40604	4	1	19	1	2016-03-23	2016-04-24	2016-05-24	2016-06-25	2016-07-26	2016-08-27	2016-09-27	2016-10-26	13.1	12.6	12.4	11.8	10.9				90	90	90	90	90	96	93	93
40605	4	1	27	1	2016-03-23	2016-04-24	2016-05-24	2016-06-25	2016-07-26	2016-08-27	2016-09-27	2016-10-26	14.7	15.2	15.5	15.2	14.6				90	90	90	90	90	93	93	92
40606	4	1	39	2	2016-03-23	2016-04-24	2016-05-24	2016-06-25	2016-07-26	2016-08-27	2016-09-27	2016-10-26	14.8	14.7	15.3	14.6	13.3	14.3	14.2	15	90	90	90	90	90	90	90	90
40607	4	1	8	1	2016-03-23	2016-04-24	2016-05-24	2016-06-25	2016-07-26	2016-08-27	2016-09-27	2016-10-26	13.9	14.4							90	90	91	91	91	91	92	92
40608	4	1	14	2	2016-03-23	2016-04-24	2016-05-24	2016-06-25	2016-07-26	2016-08-27	2016-09-27	2016-10-26	13.6	14.3	14.7	14.9	14.6	13.4	14.7	14.9	90	90	90	90	90	90	90	90
40609	4	1	13	2	2016-03-23	2016-04-24	2016-05-24	2016-06-25	2016-07-26	2016-08-27	2016-09-27	2016-10-26	14.9	14.6	14.9	14.7	15.2	14.7			90	90	90	90	90	90	92	92
40610	4	1	38	2	2016-03-23	2016-04-24	2016-05-24	2016-06-25	2016-07-26	2016-08-27	2016-09-27	2016-10-26	15.9								90	91	93	93	93	93	93	92
40611	4	1	30	1	2016-03-23	2016-04-24	2016-05-24	2016-06-25	2016-07-26	2016-08-27	2016-09-27	2016-10-26	15.4								90	91	93	93	93	93	93	92
40612	4	1	26	2	2016-03-23	2016-04-24	2016-05-24	2016-06-25	2016-07-26	2016-08-27	2016-09-27	2016-10-26	15.2	15.7	16.5	16.2	15	15.5	15	14.7	90	90	90	90	90	90	90	90
40613	4	1	21	2	2016-03-23	2016-04-24	2016-05-24	2016-06-25	2016-07-26	2016-08-27	2016-09-27	2016-10-26	12.7	11	11.4	11.6		14.6	12.4		90	90	90	90	94	90	90	94
90614	9	1	22	2	2016-03-23	2016-04-24	2016-05-24	2016-06-25	2016-07-26	2016-08-27	2016-09-27	2016-10-26	13.6		15.3	14.2	13.9	14.1			90	91	90	90	90	90	92	92
90615	9	1	42	2	2016-03-23	2016-04-24	2016-05-24	2016-06-25	2016-07-26	2016-08-27	2016-09-27	2016-10-26	13.6	15.1	14.8	14.3	14.6	14.3	14.6	14.4	90	90	90	90	90	90	90	90
90616	9	1	29	2	2016-03-23	2016-04-26	2016-05-24	2016-06-25	2016-07-26	2016-08-27	2016-09-27	2016-10-26	14.9	14.1	14.2	14.3	14.6	14.1	14.9	14.5	90	90	90	90	90	90	90	90
90617	9	1	17	2	2016-03-23	2016-04-26	2016-05-24	2016-06-25	2016-07-26	2016-08-27	2016-09-27	2016-10-26	16.8	16.8	16.5	16.5	16.4	15.7	15.9	16.2	90	90	90	90	90	90	90	90
90618	9	1	49	1	2016-03-23	2016-04-26	2016-05-24	2016-06-25	2016-07-26	2016-08-27	2016-09-27	2016-10-26	14.2	12.8		12	13.4	14	14.9	15	90	90	97	90	90	90	90	90
90619	9	1	21	2	2016-03-23	2016-04-26	2016-05-24	2016-06-25	2016-07-26	2016-08-27	2016-09-27	2016-10-26	14.4	13.7	13.8	14.2	13.7	14.1			90	90	90	90	90	90	93	93
90620	9	1	9	2	2016-03-23	2016-04-26	2016-05-24	2016-06-25	2016-07-26	2016-08-27	2016-09-27	2016-10-26	13.9	14.1	14	12.8	11.4	12	11.5	11.7	90	90	90	90	90	90	90	90
30621	3	1	20	2	2016-03-23	2016-04-24	2016-05-24	2016-06-25	2016-07-26	2016-08-27	2016-09-27	2016-10-26	12.1	12.5	12.6	13.5	14	13.8	13.5	13.5	90	90	90	90	90	90	90	90
30622	3	1	39	1	2016-03-23	2016-04-24	2016-05-24	2016-06-25	2016-07-26	2016-08-27	2016-09-27	2016-10-26	13.3	13.4	13.7	13.6	13.9	14.1	14.2	14.1	90	90	90	90	90	90	90	90
30623	3	1	9	2	2016-03-23	2016-04-24	2016-05-24	2016-06-25	2016-07-26	2016-08-27	2016-09-27	2016-10-26	9.4	13.1		12	12.8	11.1	12.3	13	90	90	92	90	90	90	90	90
30624	3	1	34	2	2016-03-23	2016-04-24	2016-05-24	2016-06-25	2016-07-26	2016-08-27	2016-09-27	2016-10-26	15.5	15.4	13.5	14.3	13.5	12	13	14.8	90	90	90	90	90	90	90	90
30625	3	1	23	1	2016-03-23	2016-04-24	2016-05-24	2016-06-25	2016-07-26	2016-08-27	2016-09-27	2016-10-26	9.4	11.2	11.5	11.8	11.2	11	12	11.9	90	90	90	90	90	90	90	90
30626	3	1	36	1	2016-03-23	2016-04-24	2016-05-24	2016-06-25	2016-07-26	2016-08-27	2016-09-27	2016-10-26	13.1	12.8	12.5	13	13.2	13.5	14	13.1	90	90	90	90	90	90	90	90
30627	3	1	40	1	2016-03-23	2016-04-24	2016-05-24	2016-06-25	2016-07-26	2016-08-27	2016-09-27	2016-10-26	15.6	16.3	15.2	16.2	15.5	15	15.5	14.6	90	90	90	90	90	90	90	90
30628	3	1	20	2	2016-03-23	2016-04-24	2016-05-24	2016-06-25	2016-07-26	2016-08-27	2016-09-27	2016-10-26	10.5	12.3	12.2	13	13.6	13	13.1	13	90	90	90	90	90	90	90	90
30629	3	1	36	1	2016-03-23	2016-04-24	2016-05-24	2016-06-25	2016-07-26	2016-08-27	2016-09-27	2016-10-26	14.9	15.9	15.6	15.5	15.6	15.5	16	15.1	90	90	90	90	90	90	90	90
30630	3	1	24	1	2016-03-23	2016-04-24	2016-05-24	2016-06-25	2016-07-26	2016-08-27	2016-09-27	2016-10-26	14.8	14.5	16.4	15	15.2	16.5	15.2	16.3	90	90	90	90	90	90	90	90
30631	3	1	34	1	2016-03-23	2016-04-24	2016-05-24	2016-06-25	2016-07-26	2016-08-27	2016-09-27	2016-10-26	17.5	16.5	14.5	16.8	17.1	14.5	16	15	90	90	90	90	90	90	90	90
30632	3	1	10	1	2016-03-23	2016-04-24	2016-05-24	2016-06-25	2016-07-26	2016-08-27	2016-09-27	2016-10-26	13.6	13	13.4	13.3	14	14.6	14.5	15	90	90	90	90	90	90	90	90
30633	3	1	38	1	2016-03-23	2016-04-24	2016-05-24	2016-06-25	2016-07-26	2016-08-27	2016-09-27	2016-10-26	15.2	15	15	15.1	15.2	15	15.1	15.5	90	90	90	90	90	90	90	90
30634	3	1	24	2	2016-03-23	2016-04-24	2016-05-24	2016-06-25	2016-07-26	2016-08-27	2016-09-27	2016-10-26	17.1	16.2	16	15.6	16.2	16.3	17	17.2	90	90	90	90	90	90	90	90
30635	3	1	8	1	2016-03-23	2016-04-24	2016-05-24	2016-06-25	2016-07-26	2016-08-27	2016-09-27	2016-10-26	9.5	10.5	10.5	11.7	12	12.6	12		90	90	90	90	90	90	90	91
30636	3	1	59	1	2016-03-23	2016-04-26	2016-05-24	2016-06-25	2016-07-26	2016-08-27	2016-09-27	2016-10-26	15.3	16.2	15.7	15	16.5	15.7	16	15.5	90	90	90	90	90	90	90	90
30637	3	1	36	2	2016-03-23	2016-04-26	2016-05-24	2016-06-25	2016-07-26	2016-08-27	2016-09-27	2016-10-26	13.9	15	14.6	16.4	14.4	14.5	15.4	14.5	90	90	90	90	90	90	90	90
30638	3	1	16	2	2016-03-23	2016-04-26	2016-05-24	2016-06-25	2016-07-26	2016-08-27	2016-09-27	2016-10-26	12.5	12.3	12.4	12.6	12.9	12.5	12.6	12.4	90	90	90	90	90	90	90	90
30639	3	1	36	2	2016-03-23	2016-04-26	2016-05-24	2016-06-25	2016-07-26	2016-08-27	2016-09-27	2016-10-26	15.5	15	13.6	13.5	13.6	13.7	15	14.8	90	90	90	90	90	90	90	90
30640	3	1	16	2	2016-03-23	2016-04-26	2016-05-24	2016-06-25	2016-07-26	2016-08-27	2016-09-27	2016-10-26	13.2	13.9	13.4	13.6	14.1	13.9	13.7	12.5	90	90	90	90	90	90	90	90
100641	10	1	22	1	2016-03-23	2016-04-24	2016-05-24	2016-06-25	2016-07-26	2016-08-27	2016-09-27	2016-10-26	13.4	13	13.4	12.2		13.4	13.8	13.2	90	90	90	90	91	90	90	90
100642	10	1	34	1	2016-03-23	2016-04-24	2016-05-24	2016-06-25	2016-07-26	2016-08-27	2016-09-27	2016-10-26	15.3	14.8	14.8	14.3		14.9	15.2	14.8	90	90	90	90	91	90	90	90
100643	10	1	29	2	2016-03-23	2016-04-24	2016-05-24	2016-06-25	2016-07-26	2016-08-27	2016-09-27	2016-10-26	14.6	14.1	14.6	14.9	15.6	16.2	15.6	16.2	90	90	90	90	90	90	90	90
100644	10	1	41	1	2016-03-23	2016-04-24	2016-05-24	2016-06-25	2016-07-26	2016-08-27	2016-09-27	2016-10-26	16.2	16.3	16.4	15.6	17	16.5	16.3	16.7	90	90	90	90	90	90	90	90
100645	10	1	53	1	2016-03-23	2016-04-24	2016-05-24	2016-06-25	2016-07-26	2016-08-27	2016-09-27	2016-10-26	15.1	14.8	14.4	15.1	15.3	16	16.1	15.9	90	90	90	90	90	90	90	90
100646	10	1	38	1	2016-03-23	2016-04-24	2016-05-24	2016-06-25	2016-07-26	2016-08-27	2016-09-27	2016-10-26	15.3	14.9	14.2	13.9	14.7	14.4	14.9	15.6	90	90	90	90	90	90	90	90
100647	10	1	6	2	2016-03-23	2016-04-24	2016-05-24	2016-06-25	2016-07-26	2016-08-27	2016-09-27	2016-10-26	12.7	13.2	12.4	11.6	11.4				90	90	90	90	90	94	95	95
100648	10	1	11	2	2016-03-23	2016-04-24	2016-05-24	2016-06-25	2016-07-26	2016-08-27	2016-09-27	2016-10-26	12.1	12.9	12.6	12.4					90	90	90	90	91	92	92	92
100649	10	1	29	2	2016-03-23	2016-04-24	2016-05-24	2016-06-25	2016-07-26	2016-08-27	2016-09-27	2016-10-26	14.8		14.6	14.3	14.4				90	91	90	90	90	92	92	92
100650	10	1	45	2	2016-03-23	2016-04-24	2016-05-24	2016-06-25	2016-07-26	2016-08-27	2016-09-27	2016-10-26	14.8	14.6	14.7	14.2		14.6	14.8	14.7	90	90	90	90	91	90	90	90
100651	10	1	6	1	2016-03-23	2016-04-24	2016-05-24	2016-06-25	2016-07-26	2016-08-27	2016-09-27	2016-10-26	13.5	13.4	13.4	11.4	13.2				90	90	90	90	90	92	92	92
100652	10	1	34	2	2016-03-23	2016-04-24	2016-05-24	2016-06-25	2016-07-26	2016-08-27	2016-09-27	2016-10-26	13.7	13.5	13.1	13.7	13.4				90	90	90	90	90	92	92	92
100653	10	1	52	1	2016-03-23	2016-04-24	2016-05-24	2016-06-25	2016-07-26	2016-08-27	2016-09-27	2016-10-26	13.9	13	13.6	14	15				90	90	90	90	90	92	92	92
100654	10	1	8	1	2016-03-23	2016-04-24	2016-05-24	2016-06-25	2016-07-26	2016-08-27	2016-09-27	2016-10-26	11.6	12.6	13.4	14.2	13.1	13.6	11.8	13.4	90	90	90	90	90	90	90	90
100655	10	1	31	2	2016-03-23	2016-04-24	2016-05-24	2016-06-25	2016-07-26	2016-08-27	2016-09-27	2016-10-26	13.6	13.1	13.4	13.6	14.1	13.7	13.4	14	90	90	90	90	90	90	90	90
100656	10	1	54	2	2016-03-23	2016-04-26	2016-05-24	2016-06-25	2016-07-26	2016-08-27	2016-09-27	2016-10-26	15.9	16.6	16.8	16.4		15.8	15.5	15.9	90	90	90	90	91	90	90	90
100657	10	1	11	2	2016-03-23	2016-04-26	2016-05-24	2016-06-25	2016-07-26	2016-08-27	2016-09-27	2016-10-26	14.7	14.7	14.4	14.9	15.4	14.2	15.1	14.9	90	90	90	90	90	90	90	90
100658	10	1	28	2	2016-03-23	2016-04-26	2016-05-24	2016-06-25	2016-07-26	2016-08-27	2016-09-27	2016-10-26	13.7	13.1	12.4	13.6	13.7	14.1	14	16.2	90	90	90	90	90	90	90	90
100659	10	1	56	1	2016-03-23	2016-04-26	2016-05-24	2016-06-25	2016-07-26	2016-08-27	2016-09-27	2016-10-26	14.8	15.4	15.3	15.7	15.4	15.7	15.1	14.7	90	90	90	90	90	90	90	90
100660	10	1	51	1	2016-03-23	2016-04-26	2016-05-24	2016-06-25	2016-07-26	2016-08-27	2016-09-27	2016-10-26	13.8	14.9	13.9	14.2	14.3	14.2	14	14	90	90	90	90	90	90	90	90
110661	11	0	12	2	2016-03-26	2016-04-26	2016-05-25	2016-06-28	2016-07-30	2016-08-28	2016-09-28	2016-10-29	13.3	12	13.2	13.3	13	13.5	13.3	13.7	90	90	90	90	90	90	90	90
110662	11	0	38	2	2016-03-26	2016-04-26	2016-05-25	2016-06-28	2016-07-30	2016-08-28	2016-09-28	2016-10-29	14	15	15.5	15	15.1	14.9	14.5	15.4	90	90	90	90	90	90	90	90
110663	11	0	48	1	2016-03-26	2016-04-26	2016-05-25	2016-06-28	2016-07-30	2016-08-28	2016-09-28	2016-10-29	13.8	13.9	13.7	13.9	14.6	15.3	14.5	14.3	90	90	90	90	90	90	90	90
110664	11	0	15	2	2016-03-26	2016-04-26	2016-05-25	2016-06-28	2016-07-30	2016-08-28	2016-09-28	2016-10-29	15	16	15.5	15.6	15.3	15.4	15.5	15	90	90	90	90	90	90	90	90
110665	11	0	36	2	2016-03-26	2016-04-26	2016-05-25	2016-06-28	2016-07-30	2016-08-28	2016-09-28	2016-10-29	13.9	13.4	13.5	13.4	14.1	14.4	14.4	14.2	90	90	90	90	90	90	90	90
110666	11	0	50	2	2016-03-26	2016-04-26	2016-05-25	2016-06-28	2016-07-30	2016-08-28	2016-09-28	2016-10-29	14.6	14.5	14.5	14.7	16	15.9	15.7	15	90	90	90	90	90	90	90	90
110667	11	0	16	2	2016-03-26	2016-04-26	2016-05-25	2016-06-28	2016-07-30	2016-08-28	2016-09-28	2016-10-29	14	14	14.7	14.5	14.7	15	15.1	15.2	90	90	90	90	90	90	90	90
110668	11	0	49	2	2016-03-26	2016-04-26	2016-05-25	2016-06-28	2016-07-30	2016-08-28	2016-09-28	2016-10-29	16.5	15.4	16.9	16.8	16.6	16.7	17	16.5	90	90	90	90	90	90	90	90
110669	11	0	24	2	2016-03-26	2016-04-26	2016-05-25	2016-06-28	2016-07-30	2016-08-28	2016-09-28	2016-10-29	14	13.4	12.7	11.4	12	12.8	12	12.6	90	90	90	90	90	90	90	90
110670	11	0	9	1	2016-03-26	2016-04-26	2016-05-25	2016-06-28	2016-07-30	2016-08-28	2016-09-28	2016-10-29	16	12	11.6	10.4	10.9	11	11.4	11.3	90	90	90	90	90	90	90	90
110671	11	0	10	1	2016-03-26	2016-04-26	2016-05-25	2016-06-28	2016-07-30	2016-08-28	2016-09-28	2016-10-29	13	13.9	13.6	13.1	13.5	14	14.1	14.3	90	90	90	90	90	90	90	90
110672	11	0	42	1	2016-03-26	2016-04-26	2016-05-25	2016-06-28	2016-07-30	2016-08-28	2016-09-28	2016-10-29	16	16	16.2	16.2	16	16	16.5	17	90	90	90	90	90	90	90	90
110673	11	0	40	1	2016-03-26	2016-04-26	2016-05-25	2016-06-28	2016-07-30	2016-08-28	2016-09-28	2016-10-29	15	14.9	14.6	14.7	15.1	15.2	15.1	15.5	90	90	90	90	90	90	90	90
110674	11	0	8	2	2016-03-26	2016-04-26	2016-05-25	2016-06-28	2016-07-30	2016-08-28	2016-09-28	2016-10-29	8.2								90	95	95	95	95	95	95	95
110675	11	0	50	2	2016-03-26	2016-04-26	2016-05-25	2016-06-28	2016-07-30	2016-08-28	2016-09-28	2016-10-29	13	12.7	12.5	13	12.9	13.5	13.2	13	90	90	90	90	90	90	90	90
110676	11	0	21	2	2016-03-26	2016-04-26	2016-05-25	2016-06-28	2016-07-30	2016-08-28	2016-09-28	2016-10-29	14.4	13	13.6	14	14.1	15.4	14.5	14.5	90	90	90	90	90	90	90	90
110677	11	0	54	2	2016-03-26	2016-04-26	2016-05-25	2016-06-28	2016-07-30	2016-08-28	2016-09-28	2016-10-29	14.5	14	14.7	14.6	14.7				90	90	90	90	90	95	95	95
110678	11	0	36	1	2016-03-26	2016-04-26	2016-05-25	2016-06-28	2016-07-30	2016-08-28	2016-09-28	2016-10-29	15.6	15	14.8	15.9	15.5	15.6	15.7	15.5	90	90	90	90	90	90	90	90
110679	11	0	21	1	2016-03-26	2016-04-26	2016-05-25	2016-06-28	2016-07-30	2016-08-28	2016-09-28	2016-10-29	14.3		14.2	14.5	14.8	14.5			90	91	90	90	90	90	93	92
110680	11	0	36	2	2016-03-26	2016-04-26	2016-05-25	2016-06-28	2016-07-30	2016-08-28	2016-09-28	2016-10-29	17		17	17.5	18.2	18.4	18	18.3	90	91	90	90	90	90	90	90
130681	13	0	17	2	2016-03-26	2016-04-26	2016-05-25	2016-06-28	2016-07-30	2016-08-28	2016-09-28	2016-10-29	12.5	11.4	12.2	11.6		13.2	12.4	12.7	90	90	90	90	92	90	90	90
130682	13	0	36	1	2016-03-26	2016-04-26	2016-05-25	2016-06-28	2016-07-30	2016-08-28	2016-09-28	2016-10-29	14.8	12.2	15	15.7		15.6	14.3	14.9	90	90	90	90	92	90	90	90
130683	13	0	35	1	2016-03-26	2016-04-26	2016-05-25	2016-06-28	2016-07-30	2016-08-28	2016-09-28	2016-10-29	14.5	14.6	14.9	15.2	14.8	14.9	15.1	15.1	90	90	90	90	90	90	90	90
130684	13	0	48	2	2016-03-26	2016-04-26	2016-05-25	2016-06-28	2016-07-30	2016-08-28	2016-09-28	2016-10-29	18.2			18.3	18.5	18.2	18	19.1	90	92	92	90	90	90	90	90
130685	13	0	50	1	2016-03-26	2016-04-26	2016-05-25	2016-06-28	2016-07-30	2016-08-28	2016-09-28	2016-10-29	16.8								90	92	92	92	92	92	92	92
130686	13	0	42	2	2016-03-26	2016-04-26	2016-05-25	2016-06-28	2016-07-30	2016-08-28	2016-09-28	2016-10-29	14.3	13.8	13.9	14.5	14.2	15	14.6	15	90	90	90	90	90	90	90	90
130687	13	0	37	2	2016-03-26	2016-04-26	2016-05-25	2016-06-28	2016-07-30	2016-08-28	2016-09-28	2016-10-29	13.4	13.6							90	90	92	92	92	92	92	92
130688	13	0	23	1	2016-03-26	2016-04-26	2016-05-25	2016-06-28	2016-07-30	2016-08-28	2016-09-28	2016-10-29	15.7	15.3	15.6	15.9	16	16.5	16.4	16.5	90	90	90	90	90	90	90	90
130689	13	0	34	2	2016-03-26	2016-04-26	2016-05-25	2016-06-28	2016-07-30	2016-08-28	2016-09-28	2016-10-29	17.3	16.4	16.3	16	16.5	16.4	17	16.8	90	90	90	90	90	90	90	90
130690	13	0	20	1	2016-03-26	2016-04-26	2016-05-25	2016-06-28	2016-07-30	2016-08-28	2016-09-28	2016-10-29	13.8	13.1	14.2	13	13	13.1	12.8		90	90	90	90	90	90	90	93
130691	13	0	44	1	2016-03-26	2016-04-26	2016-05-25	2016-06-28	2016-07-30	2016-08-28	2016-09-28	2016-10-29	14.3	13.5	15.3	14	14.6	14.3	15.7		90	90	90	90	90	90	90	93
130692	13	0	31	2	2016-03-26	2016-04-26	2016-05-25	2016-06-28	2016-07-30	2016-08-28	2016-09-28	2016-10-29	13.7	13.9	13.7	12.8	13.1	13	13.1	13.5	90	90	90	90	90	90	90	90
130693	13	0	48	2	2016-03-26	2016-04-26	2016-05-25	2016-06-28	2016-07-30	2016-08-28	2016-09-28	2016-10-29	14.8	14.6	14.5	15	14.8	14.9	14.8	14.7	90	90	90	90	90	90	90	90
130694	13	0	30	1	2016-03-26	2016-04-26	2016-05-25	2016-06-28	2016-07-30	2016-08-28	2016-09-28	2016-10-29	13.8	13.5	13.6	14.6	15	15.2	15.5	15.4	90	90	90	90	90	90	90	90
130695	13	0	51	1	2016-03-26	2016-04-26	2016-05-25	2016-06-28	2016-07-30	2016-08-28	2016-09-28	2016-10-29	15.5	14.5	15	15.9	16.7	15.6	15.7	15.3	90	90	90	90	90	90	90	90
130696	13	0	27	2	2016-03-26	2016-04-26	2016-05-25	2016-06-28	2016-07-30	2016-08-28	2016-09-28	2016-10-29	13.7	13.6	13.3	13.7	14.8	14.5	14.6	14	90	90	90	90	90	90	90	90
130697	13	0	30	1	2016-03-26	2016-04-26	2016-05-25	2016-06-28	2016-07-30	2016-08-28	2016-09-28	2016-10-29	15.5	14.5	14			15.6	15.7		90	90	90	91	92	90	90	93
130698	13	0	20	2	2016-03-26	2016-04-26	2016-05-25	2016-06-28	2016-07-30	2016-08-28	2016-09-28	2016-10-29	13.9	12.3	12.4		13	12.7	12.8	13.5	90	90	90	91	90	90	90	90
130699	13	0	36	1	2016-03-26	2016-04-26	2016-05-25	2016-06-28	2016-07-30	2016-08-28	2016-09-28	2016-10-29	16.3	16	14.9	15.4	15.6	15.5	15.9	16.3	90	90	90	90	90	90	90	90
130700	13	0	17	2	2016-03-26	2016-04-26	2016-05-25	2016-06-28	2016-07-30	2016-08-28	2016-09-28	2016-10-29	13.3	13.4	13.5	13.8		14		13.8	90	90	90	90	94	90	93	90
170701	17	0	25	2	2016-03-26	2016-04-26	2016-05-25	2016-06-28	2016-07-30	2016-08-28	2016-09-28	2016-10-29	14.7	14.6	15	14.7	14.2	14.1	14.2	14.1	90	90	90	90	90	90	90	90
170702	17	0	21	1	2016-03-26	2016-04-26	2016-05-25	2016-06-28	2016-07-30	2016-08-28	2016-09-28	2016-10-29	15.4	15.5	15.6	15.1	14.5	14.7	15	15.2	90	90	90	90	90	90	90	90
170703	17	0	43	1	2016-03-26	2016-04-26	2016-05-25	2016-06-28	2016-07-30	2016-08-28	2016-09-28	2016-10-29	14.1	14							90	90	91	93	93	93	93	92
170704	17	0	48	1	2016-03-26	2016-04-26	2016-05-25	2016-06-28	2016-07-30	2016-08-28	2016-09-28	2016-10-29	16.1	15.5	15.4	15.5	15.6	15.5	15.2	15.4	90	90	90	90	90	90	90	90
170705	17	0	36	2	2016-03-26	2016-04-26	2016-05-25	2016-06-28	2016-07-30	2016-08-28	2016-09-28	2016-10-29	14.4	14.8	14.6	14.4	14.5	14.4	14.2	14.2	90	90	90	90	90	90	90	90
170706	17	0	41	2	2016-03-26	2016-04-26	2016-05-25	2016-06-28	2016-07-30	2016-08-28	2016-09-28	2016-10-29	14.9	14.6	14.8	14.6					90	90	90	90	96	93	93	92
170707	17	0	56	1	2016-03-26	2016-04-26	2016-05-25	2016-06-28	2016-07-30	2016-08-28	2016-09-28	2016-10-29	14.7	14.1	14.3		14.4	14.5			90	90	90	93	90	90	93	92
170708	17	0	50	1	2016-03-26	2016-04-26	2016-05-25	2016-06-28	2016-07-30	2016-08-28	2016-09-28	2016-10-29	15.6	15.7	15.4	15.5	15.6	15.5	15.6		90	90	90	90	90	90	90	92
170709	17	0	34	2	2016-03-26	2016-04-26	2016-05-25	2016-06-28	2016-07-30	2016-08-28	2016-09-28	2016-10-29	15.8	16.3	16	15.9	15.7	15.6	15.4		90	90	90	90	90	90	90	92
170710	17	0	50	2	2016-03-26	2016-04-26	2016-05-25	2016-06-28	2016-07-30	2016-08-28	2016-09-28	2016-10-29	15.1	15.2	15.1	15.4	15.3	15.2	15.4		90	90	90	90	90	90	90	92
170711	17	0	8	2	2016-03-26	2016-04-26	2016-05-25	2016-06-28	2016-07-30	2016-08-28	2016-09-28	2016-10-29	15.3	15.9	15.7	16	15.7	15.4	14.8		90	90	90	90	90	90	90	92
170712	17	0	56	2	2016-03-26	2016-04-26	2016-05-25	2016-06-28	2016-07-30	2016-08-28	2016-09-28	2016-10-29	14.5	14.9	14.5	14.3	14.1	14.5			90	90	90	90	90	90	93	93
170713	17	0	57	2	2016-03-26	2016-04-26	2016-05-25	2016-06-28	2016-07-30	2016-08-28	2016-09-28	2016-10-29	17	17	16.9	16.8	16.5	16.2	16.5	16.4	90	90	90	90	90	90	90	90
170714	17	0	27	2	2016-03-26	2016-04-26	2016-05-25	2016-06-28	2016-07-30	2016-08-28	2016-09-28	2016-10-29	15.9	15.6	15.9	16	15.9	16	15.8	15.9	90	90	90	90	90	90	90	90
170715	17	0	22	2	2016-03-26	2016-04-26	2016-05-25	2016-06-28	2016-07-30	2016-08-28	2016-09-28	2016-10-29	13.5	13.5	13.2	12.9					90	90	90	90	95	95	95	95
170716	17	0	44	2	2016-03-26	2016-04-26	2016-05-25	2016-06-28	2016-07-30	2016-08-28	2016-09-28	2016-10-29	16.3	17							90	90	93	92	92	92	92	92
170717	17	0	23	2	2016-03-26	2016-04-26	2016-05-25	2016-06-28	2016-07-30	2016-08-28	2016-09-28	2016-10-29	15	14.4	14.6	14.7	14.9	14.5			90	90	90	90	90	90	92	92
170718	17	0	42	2	2016-03-26	2016-04-26	2016-05-25	2016-06-28	2016-07-30	2016-08-28	2016-09-28	2016-10-29	15.3							16.1	90	92	92	92	92	92	92	90
170719	17	0	22	2	2016-03-26	2016-04-26	2016-05-25	2016-06-28	2016-07-30	2016-08-28	2016-09-28	2016-10-29	14.4	14.3	14.1	14.3	14.5	14.4	14.5		90	90	90	90	90	90	90	92
170720	17	0	36	1	2016-03-26	2016-04-26	2016-05-25	2016-06-28	2016-07-30	2016-08-28	2016-09-28	2016-10-29	14.1	15.3	15.5	15.9	15.5	15.4	15.6		90	90	90	90	90	90	90	92
90721	9	1	32	2	2016-03-26	2016-04-26	2016-05-25	2016-06-28	2016-07-30	2016-08-28	2016-09-28	2016-10-29	15.8	15.3	15.4	15.3	15.4	15.6	15	15.1	90	90	90	90	90	90	90	90
90722	9	1	34	1	2016-03-26	2016-04-26	2016-05-25	2016-06-28	2016-07-30	2016-08-28	2016-09-28	2016-10-29	15.6	15.5	14.5	15.1	15.5	15.7	15.8	15.6	90	90	90	90	90	90	90	90
90723	9	1	11	1	2016-03-26	2016-04-26	2016-05-25	2016-06-28	2016-07-30	2016-08-28	2016-09-28	2016-10-29	12.1	12	12.2	12	11.7				90	90	90	90	90	92	92	92
90724	9	1	40	2	2016-03-26	2016-04-26	2016-05-25	2016-06-28	2016-07-30	2016-08-28	2016-09-28	2016-10-29	15.4	14.9	15.1	15.5				15.5	90	90	90	90	91	93	93	90
90725	9	1	28	1	2016-03-26	2016-04-26	2016-05-25	2016-06-28	2016-07-30	2016-08-28	2016-09-28	2016-10-29	14.9	14.4	14.4	14.3	14.4				90	90	90	90	90	92	92	92
90726	9	1	15	1	2016-03-26	2016-04-26	2016-05-25	2016-06-28	2016-07-30	2016-08-28	2016-09-28	2016-10-29	15	14.9							90	90	94	91	91	92	92	92
90727	9	1	10	1	2016-03-26	2016-04-26	2016-05-25	2016-06-28	2016-07-30	2016-08-28	2016-09-28	2016-10-29	12	12.9	14.8	15	15.7	14.7	15	15.7	90	90	90	90	90	90	90	90
90728	9	1	21	2	2016-03-26	2016-04-26	2016-05-25	2016-06-28	2016-07-30	2016-08-28	2016-09-28	2016-10-29	17.6	17	16.1	16.6	16.4	16.7	16.4	16.3	90	90	90	90	90	90	90	90
90729	9	1	36	1	2016-03-26	2016-04-26	2016-05-25	2016-06-28	2016-07-30	2016-08-28	2016-09-28	2016-10-29	15.4	14.1	14.3	14.8	14.2	14.9	14.5	14.1	90	90	90	90	90	90	90	90
90730	9	1	53	1	2016-03-26	2016-04-26	2016-05-25	2016-06-28	2016-07-30	2016-08-28	2016-09-28	2016-10-29	16.5	15.3	15.6	16.3	16.4	16.1	15.9	15.4	90	90	90	90	90	90	90	90
90731	9	1	29	1	2016-03-26	2016-04-26	2016-05-25	2016-06-28	2016-07-30	2016-08-28	2016-09-28	2016-10-29	15.6	15.3	15.6	15.6	16.2	15.8	15.3	15.4	90	90	90	90	90	90	90	90
90732	9	1	9	1	2016-03-26	2016-04-26	2016-05-25	2016-06-28	2016-07-30	2016-08-28	2016-09-28	2016-10-29	10.9	11.3	11.4	11.5	11.4	11.5	11.3	11	90	90	90	90	90	90	90	90
90733	9	1	21	2	2016-03-26	2016-04-26	2016-05-25	2016-06-28	2016-07-30	2016-08-28	2016-09-28	2016-10-29	13.1	13.4	12.9	13.1					90	90	90	90	96	96	96	96
90734	9	1	52	2	2016-03-26	2016-04-26	2016-05-25	2016-06-28	2016-07-30	2016-08-28	2016-09-28	2016-10-29	16.2	15.8	16.1	15.7		16.2			90	90	90	90	91	90	93	92
90735	9	1	37	1	2016-03-26	2016-04-26	2016-05-25	2016-06-28	2016-07-30	2016-08-28	2016-09-28	2016-10-29	14.5	14	14.6	14.6		15.1			90	90	90	90	91	90	93	92
90736	9	1	9	2	2016-03-26	2016-04-26	2016-05-25	2016-06-28	2016-07-30	2016-08-28	2016-09-28	2016-10-29	13.9		14.8	14.4		13.9	13.9		90	91	90	90	91	90	90	92
90737	9	1	16	1	2016-03-26	2016-04-26	2016-05-25	2016-06-28	2016-07-30	2016-08-28	2016-09-28	2016-10-29	14.5	14.4	14.1	14.5	15.8	15	15.5	15.5	90	90	90	90	90	90	90	90
90738	9	1	55	2	2016-03-26	2016-04-26	2016-05-25	2016-06-28	2016-07-30	2016-08-28	2016-09-28	2016-10-29	16.3	15.8	15.1	15.4	16.5	16.1	15.6	15.7	90	90	90	90	90	90	90	90
90739	9	1	20	2	2016-03-26	2016-04-26	2016-05-25	2016-06-28	2016-07-30	2016-08-28	2016-09-28	2016-10-29	15.7	15.9	16.6	15.1	15.4	15.5	15.5	15.4	90	90	90	90	90	90	90	90
90740	9	1	18	1	2016-03-26	2016-04-26	2016-05-25	2016-06-28	2016-07-30	2016-08-28	2016-09-28	2016-10-29	12.9	13.8	13	12.2					90	90	90	90	94	94	92	92
30741	3	1	54	2	2016-03-26	2016-04-26	2016-05-25	2016-06-28	2016-07-30	2016-08-28	2016-09-28	2016-10-29	14.5	14.3	14	14.3	14.4	14.9	14.2	14.6	90	90	90	90	90	90	90	90
30742	3	1	42	1	2016-03-26	2016-04-26	2016-05-25	2016-06-28	2016-07-30	2016-08-28	2016-09-28	2016-10-29	13.7	14.4	13.2	14.9	14.1	14.4	14	14.2	90	90	90	90	90	90	90	90
30743	3	1	32	1	2016-03-26	2016-04-26	2016-05-25	2016-06-28	2016-07-30	2016-08-28	2016-09-28	2016-10-29	13.1	13.9	13.5	13.9	14.5	14.6	14.7	15	90	90	90	90	90	90	90	90
30744	3	1	59	1	2016-03-26	2016-04-26	2016-05-25	2016-06-28	2016-07-30	2016-08-28	2016-09-28	2016-10-29	16.4	15.8	16	16.1	16	16.6	16.4	16.4	90	90	90	90	90	90	90	90
30745	3	1	34	1	2016-03-26	2016-04-26	2016-05-25	2016-06-28	2016-07-30	2016-08-28	2016-09-28	2016-10-29	16.5	15.6	14.8	14.9	14.7	15	15.5	14.5	90	90	90	90	90	90	90	90
30746	3	1	20	1	2016-03-26	2016-04-26	2016-05-25	2016-06-28	2016-07-30	2016-08-28	2016-09-28	2016-10-29	15.2	14.9	15	15.6	16.2	16	15.3	14.6	90	90	90	90	90	90	90	90
30747	3	1	7	2	2016-03-26	2016-04-26	2016-05-25	2016-06-28	2016-07-30	2016-08-28	2016-09-28	2016-10-29	10.6	11	11	11.1	12.2	12.5	12.1	12	90	90	90	90	90	90	90	90
30748	3	1	30	2	2016-03-26	2016-04-26	2016-05-25	2016-06-28	2016-07-30	2016-08-28	2016-09-28	2016-10-29	14.1	13.9	13.5	14.1	14.3	14.2	14.5	14.5	90	90	90	90	90	90	90	90
30749	3	1	18	1	2016-03-26	2016-04-26	2016-05-25	2016-06-28	2016-07-30	2016-08-28	2016-09-28	2016-10-29	14.3	14.1	14	14.4	14	14.6	14.5	14.6	90	90	90	90	90	90	90	90
30750	3	1	14	1	2016-03-26	2016-04-26	2016-05-25	2016-06-28	2016-07-30	2016-08-28	2016-09-28	2016-10-29	12.9	13	12.4	14	13	13.6	13.5	14	90	90	90	90	90	90	90	90
30751	3	1	48	1	2016-03-26	2016-04-26	2016-05-25	2016-06-28	2016-07-30	2016-08-28	2016-09-28	2016-10-29	13.3	13.8	13.6	13.1	14.1	14.9	14.5	15.5	90	90	90	90	90	90	90	90
30752	3	1	24	2	2016-03-26	2016-04-26	2016-05-25	2016-06-28	2016-07-30	2016-08-28	2016-09-28	2016-10-29	11.3	11.8	12	12	12	12.1	13	13	90	90	90	90	90	90	90	90
30753	3	1	36	2	2016-03-26	2016-04-26	2016-05-25	2016-06-28	2016-07-30	2016-08-28	2016-09-28	2016-10-29	13.4	14	13.9	15.8	12.5	13	13.1	13.4	90	90	90	90	90	90	90	90
30754	3	1	48	2	2016-03-26	2016-04-26	2016-05-25	2016-06-28	2016-07-30	2016-08-28	2016-09-28	2016-10-29	14.9	15.5	15.7	14.5	16	16.2	16.4	16.1	90	90	90	90	90	90	90	90
30755	3	1	36	2	2016-03-26	2016-04-26	2016-05-25	2016-06-28	2016-07-30	2016-08-28	2016-09-28	2016-10-29	14.3	14.5	14.4	13.2	14.8	14.9	14.4	14.6	90	90	90	90	90	90	90	90
30756	3	1	12	2	2016-03-26	2016-04-26	2016-05-25	2016-06-28	2016-07-30	2016-08-28	2016-09-28	2016-10-29	13.4	12.5	12.4	13	13.9	13.3	12.9	13.1	90	90	90	90	90	90	90	90
30757	3	1	12	2	2016-03-26	2016-04-26	2016-05-25	2016-06-28	2016-07-30	2016-08-28	2016-09-28	2016-10-29	14.7	13.8	13.1	13	13.6	14.1	14.5	14.6	90	90	90	90	90	90	90	90
30758	3	1	48	1	2016-03-26	2016-04-26	2016-05-25	2016-06-28	2016-07-30	2016-08-28	2016-09-28	2016-10-29	16.2	15.6	15	15.1					90	90	90	90	92	92	92	92
30759	3	1	36	1	2016-03-26	2016-04-26	2016-05-25	2016-06-28	2016-07-30	2016-08-28	2016-09-28	2016-10-29	15.2	15.9	15.5	15.9					90	90	90	90	92	92	92	92
30760	3	1	24	2	2016-03-26	2016-04-26	2016-05-25	2016-06-28	2016-07-30	2016-08-28	2016-09-28	2016-10-29	12.3	12.7	12.5	12.7					90	90	90	90	92	92	92	92
100761	10	1	6	2	2016-03-26	2016-04-26	2016-05-25	2016-06-28	2016-07-30	2016-08-28	2016-09-28	2016-10-29	11.4	11.2	10.9	11.4	11.2	11.5	10.8	10.9	90	90	90	90	90	90	90	90
100762	10	1	9	1	2016-03-26	2016-04-26	2016-05-25	2016-06-28	2016-07-30	2016-08-28	2016-09-28	2016-10-29	12.2	12.5	12.4	12.4	12.6	11.8	12	11.6	90	90	90	90	90	90	90	90
100763	10	1	28	2	2016-03-26	2016-04-26	2016-05-25	2016-06-28	2016-07-30	2016-08-28	2016-09-28	2016-10-29	14.6	15	14.1	13.7	13.7	12.8	13.1	13.3	90	90	90	90	90	90	90	90
100764	10	1	55	1	2016-03-26	2016-04-26	2016-05-25	2016-06-28	2016-07-30	2016-08-28	2016-09-28	2016-10-29	15.9	15.8	14.4	15.6	14.9	15.1	15	15.7	90	90	90	90	90	90	90	90
100765	10	1	38	2	2016-03-26	2016-04-26	2016-05-25	2016-06-28	2016-07-30	2016-08-28	2016-09-28	2016-10-29	14.1	14.6	14.9	14.4	14.3	15.9	16.1	17.1	90	90	90	90	90	90	90	90
100766	10	1	29	1	2016-03-26	2016-04-26	2016-05-25	2016-06-28	2016-07-30	2016-08-28	2016-09-28	2016-10-29	13.9	16.6	16.4				16.5	16.1	90	90	90	91	91	93	90	90
100767	10	1	38	1	2016-03-26	2016-04-26	2016-05-25	2016-06-28	2016-07-30	2016-08-28	2016-09-28	2016-10-29	16	16	16.9				17		90	90	90	91	91	93	90	91
100768	10	1	23	2	2016-03-26	2016-04-26	2016-05-25	2016-06-28	2016-07-30	2016-08-28	2016-09-28	2016-10-29	11.4	11.5	12.6	11.7	11.7		11.7		90	90	90	90	90	91	90	92
70769	7	1	12	2	2016-03-26	2016-04-26	2016-05-25	2016-06-28	2016-07-30	2016-08-28	2016-09-28	2016-10-29	13.8	14.4	14.1	13.4	14.2	14.4	14	14.2	90	90	90	90	90	90	90	90
70770	7	1	9	2	2016-03-26	2016-04-26	2016-05-25	2016-06-28	2016-07-30	2016-08-28	2016-09-28	2016-10-29	12.7		14.8	14.2	14.4	13.4	13.6	14.6	90	91	90	90	90	90	90	90
70771	7	1	9	1	2016-03-26	2016-04-26	2016-05-25	2016-06-28	2016-07-30	2016-08-28	2016-09-28	2016-10-29	12.2	13	13.2	13.4	14.2	12.7	13.2	12.9	90	90	90	90	90	90	90	90
70772	7	1	30	1	2016-03-26	2016-04-26	2016-05-25	2016-06-28	2016-07-30	2016-08-28	2016-09-28	2016-10-29	14.3	14.2	14.4	14.9	14.9	14.9	15	15.7	90	90	90	90	90	90	90	90
70773	7	1	52	1	2016-03-26	2016-04-26	2016-05-25	2016-06-28	2016-07-30	2016-08-28	2016-09-28	2016-10-29	13.9	14	14.1	14.1	14.2	14.8	14.5	14.2	90	90	90	90	90	90	90	90
70774	7	1	44	1	2016-03-26	2016-04-26	2016-05-25	2016-06-28	2016-07-30	2016-08-28	2016-09-28	2016-10-29	16.2	15.8	16.4	16.6	16.7	16.2	16.8	17	90	90	90	90	90	90	90	90
70775	7	1	41	1	2016-03-26	2016-04-26	2016-05-25	2016-06-28	2016-07-30	2016-08-28	2016-09-28	2016-10-29	15.7	15.8	16.1	15.7	15.8	16.1	15.6	15.6	90	90	90	90	90	90	90	90
70776	7	1	20	2	2016-03-26	2016-04-26	2016-05-25	2016-06-28	2016-07-30	2016-08-28	2016-09-28	2016-10-29	13.2	12.9	14.1	14.2	14.2	14.4	15.5	15.2	90	90	90	90	90	90	90	90
70777	7	1	46	1	2016-03-26	2016-04-26	2016-05-25	2016-06-28	2016-07-30	2016-08-28	2016-09-28	2016-10-29	14.7	14.4	14.8	16	15.7	15.1	15.3	15.7	90	90	90	90	90	90	90	90
70778	7	1	27	2	2016-03-26	2016-04-26	2016-05-25	2016-06-28	2016-07-30	2016-08-28	2016-09-28	2016-10-29	13.2	13.3	13.7	12.9	13.2	13.3	13.7	14.3	90	90	90	90	90	90	90	90
70779	7	1	54	1	2016-03-26	2016-04-26	2016-05-25	2016-06-28	2016-07-30	2016-08-28	2016-09-28	2016-10-29	13.4	13.6	13.9	13.9	14.4	15.1	14.6	15.2	90	90	90	90	90	90	90	90
70780	7	1	19	1	2016-03-26	2016-04-26	2016-05-25	2016-06-28	2016-07-30	2016-08-28	2016-09-28	2016-10-29	14	14.3	14.4	13.1	13.4	13.4	13.7	13.4	90	90	90	90	90	90	90	90
110781	11	0	11	1	2016-03-27	2016-04-27	2016-05-28	2016-06-29	2016-07-30	2016-08-29	2016-10-01	2016-10-30	11.4	12.5	11.8	13.5	13.6	14.2	14	13.6	90	90	90	90	90	90	90	90
110782	11	0	36	1	2016-03-27	2016-04-27	2016-05-28	2016-06-29	2016-07-30	2016-08-29	2016-10-01	2016-10-30	13	13.5	13	13.4	13.6	14.3	14.4	14.2	90	90	90	90	90	90	90	90
110783	11	0	11	1	2016-03-27	2016-04-27	2016-05-28	2016-06-29	2016-07-30	2016-08-29	2016-10-01	2016-10-30	12	13.4	13.8	13.5	14	15	14.8	15	90	90	90	90	90	90	90	90
110784	11	0	22	2	2016-03-27	2016-04-27	2016-05-28	2016-06-29	2016-07-30	2016-08-29	2016-10-01	2016-10-30	13		14	14.1	14.2	13.8	13.1	13.5	90	91	90	90	90	90	90	90
110785	11	0	6	2	2016-03-27	2016-04-27	2016-05-28	2016-06-29	2016-07-30	2016-08-29	2016-10-01	2016-10-30	12.8	12.9							90	90	94	92	92	92	92	92
110786	11	0	14	1	2016-03-27	2016-04-27	2016-05-28	2016-06-29	2016-07-30	2016-08-29	2016-10-01	2016-10-30	12.9	12	11.6	12.3	12.7	13.4	14.7	13.9	90	90	90	90	90	90	90	90
110787	11	0	12	2	2016-03-27	2016-04-27	2016-05-28	2016-06-29	2016-07-30	2016-08-29	2016-10-01	2016-10-30	11.5	12	12.5	13.1	13.5	14.7	14.6	14.6	90	90	90	90	90	90	90	90
110788	11	0	8	2	2016-03-27	2016-04-27	2016-05-28	2016-06-29	2016-07-30	2016-08-29	2016-10-01	2016-10-30	13.6	13.4	13.7	13.5	14.2	13.2	13.7	14.5	90	90	90	90	90	90	90	90
110789	11	0	17	1	2016-03-27	2016-04-27	2016-05-28	2016-06-29	2016-07-30	2016-08-29	2016-10-01	2016-10-30	12.5	14.3	13.4	13.9	14	14	13.5	14.5	90	90	90	90	90	90	90	90
110790	11	0	36	2	2016-03-27	2016-04-27	2016-05-28	2016-06-29	2016-07-30	2016-08-29	2016-10-01	2016-10-30	13.8	13.5			15.4	14.5	15.5	15.9	90	90	91	91	90	90	90	90
110791	11	0	12	1	2016-03-27	2016-04-27	2016-05-28	2016-06-29	2016-07-30	2016-08-29	2016-10-01	2016-10-30	12.2	12.9	12.5	12.6	13	14.3	14.5	14.6	90	90	90	90	90	90	90	90
110792	11	0	48	2	2016-03-27	2016-04-27	2016-05-28	2016-06-29	2016-07-30	2016-08-29	2016-10-01	2016-10-30	13.6	13.5	13.3	16.4	14	13.4	13.5	14	90	90	90	90	90	90	90	90
110793	11	0	24	2	2016-03-27	2016-04-27	2016-05-28	2016-06-29	2016-07-30	2016-08-29	2016-10-01	2016-10-30	14	13.1	13.6	13.4	13.5	14	13.4	14.7	90	90	90	90	90	90	90	90
110794	11	0	32	2	2016-03-27	2016-04-27	2016-05-28	2016-06-29	2016-07-30	2016-08-29	2016-10-01	2016-10-30	14.9	14.5	13.9	14					90	90	90	90	93	93	92	92
110795	11	0	45	1	2016-03-27	2016-04-27	2016-05-28	2016-06-29	2016-07-30	2016-08-29	2016-10-01	2016-10-30	15	15	14.4	14.5					90	90	90	90	93	93	92	92
110796	11	0	36	1	2016-03-27	2016-04-27	2016-05-28	2016-06-29	2016-07-30	2016-08-29	2016-10-01	2016-10-30	14.6	14	14.7	14.5	14.6	14.7	14	14.7	90	90	90	90	90	90	90	90
110797	11	0	48	1	2016-03-27	2016-04-27	2016-05-28	2016-06-29	2016-07-30	2016-08-29	2016-10-01	2016-10-30	13.2	13	13.4	13.5		14	14.7	14.5	90	90	90	90	91	90	90	90
110798	11	0	14	2	2016-03-27	2016-04-27	2016-05-28	2016-06-29	2016-07-30	2016-08-29	2016-10-01	2016-10-30	10.9	10.9	11						90	90	90	92	92	92	92	92
110799	11	0	24	1	2016-03-27	2016-04-27	2016-05-28	2016-06-29	2016-07-30	2016-08-29	2016-10-01	2016-10-30	14.5	14.5	15	14.4	14.6	15.5	15.4	15.2	90	90	90	90	90	90	90	90
110800	11	0	11	1	2016-03-27	2016-04-27	2016-05-28	2016-06-29	2016-07-30	2016-08-29	2016-10-01	2016-10-30	12.3	12.2	11.6	12.3	12.7	12.7	13.2	13	90	90	90	90	90	90	90	90
130801	13	0	30	2	2016-03-27	2016-04-27	2016-05-28	2016-06-29	2016-07-30	2016-08-29	2016-10-01	2016-10-30	15.9	15.5	15.7	15.5		15	14.8	14.5	90	90	90	90	91	90	90	90
130802	13	0	54	1	2016-03-27	2016-04-27	2016-05-28	2016-06-29	2016-07-30	2016-08-29	2016-10-01	2016-10-30	14.3	14.2	14.2	13.9	14.7	14.5	14.6	14.7	90	90	90	90	90	90	90	90
130803	13	0	10	1	2016-03-27	2016-04-27	2016-05-28	2016-06-29	2016-07-30	2016-08-29	2016-10-01	2016-10-30	13.3	13.1	13.7	13.8	14.2	14	13.9	14.3	90	90	90	90	90	90	90	90
130804	13	0	30	2	2016-03-27	2016-04-27	2016-05-28	2016-06-29	2016-07-30	2016-08-29	2016-10-01	2016-10-30	13.7								90	92	92	92	92	92	92	92
130805	13	0	42	2	2016-03-27	2016-04-27	2016-05-28	2016-06-29	2016-07-30	2016-08-29	2016-10-01	2016-10-30	15.3								90	92	92	92	92	92	92	92
130806	13	0	56	1	2016-03-27	2016-04-27	2016-05-28	2016-06-29	2016-07-30	2016-08-29	2016-10-01	2016-10-30	14.3								90	92	92	92	92	92	92	92
130807	13	0	10	1	2016-03-27	2016-04-27	2016-05-28	2016-06-29	2016-07-30	2016-08-29	2016-10-01	2016-10-30	15.2	14.4	15	14.5	14.7	15	14.1	14.3	90	90	90	90	90	90	90	90
130808	13	0	52	1	2016-03-27	2016-04-27	2016-05-28	2016-06-29	2016-07-30	2016-08-29	2016-10-01	2016-10-30	17.2	17	16.4	16.5	16.6	16.3	16	16.1	90	90	90	90	90	90	90	90
130809	13	0	22	1	2016-03-27	2016-04-27	2016-05-28	2016-06-29	2016-07-30	2016-08-29	2016-10-01	2016-10-30	13.5	13.3	14	14.5	14.1	14.2	14	14.4	90	90	90	90	90	90	90	90
130810	13	0	48	1	2016-03-27	2016-04-27	2016-05-28	2016-06-29	2016-07-30	2016-08-29	2016-10-01	2016-10-30	14.2	13.9	13.6	14	13.3	13.9	13.8	13.7	90	90	90	90	90	90	90	90
130811	13	0	34	2	2016-03-27	2016-04-27	2016-05-28	2016-06-29	2016-07-30	2016-08-29	2016-10-01	2016-10-30	15	15	14.9	14.8	14.6	13.8	14.9	15	90	90	90	90	90	90	90	90
130812	13	0	6	2	2016-03-27	2016-04-27	2016-05-28	2016-06-29	2016-07-30	2016-08-29	2016-10-01	2016-10-30	13	11.9	12.2	11.3		12	11.9	12.3	90	90	90	90	91	90	90	90
130813	13	0	11	1	2016-03-27	2016-04-27	2016-05-28	2016-06-29	2016-07-30	2016-08-29	2016-10-01	2016-10-30	11.2	11.8	11.9	12.1	12	13.1			90	90	90	90	90	90	93	93
130814	13	0	22	1	2016-03-27	2016-04-27	2016-05-28	2016-06-29	2016-07-30	2016-08-29	2016-10-01	2016-10-30	14	13.5	13.6	13.5	14	14.1	14.7	14.5	90	90	90	90	90	90	90	90
130815	13	0	40	2	2016-03-27	2016-04-27	2016-05-28	2016-06-29	2016-07-30	2016-08-29	2016-10-01	2016-10-30	13.7	13.3	13.4	13.6	14.3	14.6	14.9	14.7	90	90	90	90	90	90	90	90
130816	13	0	48	2	2016-03-27	2016-04-27	2016-05-28	2016-06-29	2016-07-30	2016-08-29	2016-10-01	2016-10-30	16.3	15.7	16.3	16.4	15	15.5	15.6	16.1	90	90	90	90	90	90	90	90
130817	13	0	42	2	2016-03-27	2016-04-27	2016-05-28	2016-06-29	2016-07-30	2016-08-29	2016-10-01	2016-10-30	17	15.9	15.3	15.9	15.5	16	16.2	15.5	90	90	90	90	90	90	90	90
130818	13	0	39	1	2016-03-27	2016-04-27	2016-05-28	2016-06-29	2016-07-30	2016-08-29	2016-10-01	2016-10-30	16	15.4	16	16.3	16.5	16	16.1	15.6	90	90	90	90	90	90	90	90
130819	13	0	42	2	2016-03-27	2016-04-27	2016-05-28	2016-06-29	2016-07-30	2016-08-29	2016-10-01	2016-10-30	15.4	14.4	15	15.1	15.1	15.4	15.2	15.4	90	90	90	90	90	90	90	90
130820	13	0	36	1	2016-03-27	2016-04-27	2016-05-28	2016-06-29	2016-07-30	2016-08-29	2016-10-01	2016-10-30	14.3	14	14.1	14	15	14.9	15.1	14.3	90	90	90	90	90	90	90	90
170821	17	0	23	2	2016-03-27	2016-04-27	2016-05-28	2016-06-29	2016-07-30	2016-08-29	2016-10-01	2016-10-30	11.5	12	12.3	12.6	12.8	13			90	90	90	90	90	90	93	92
170822	17	0	45	1	2016-03-27	2016-04-27	2016-05-28	2016-06-29	2016-07-30	2016-08-29	2016-10-01	2016-10-30	14.5	14.5	14.8	14.6					90	90	90	90	92	92	92	92
170823	17	0	57	1	2016-03-27	2016-04-27	2016-05-28	2016-06-29	2016-07-30	2016-08-29	2016-10-01	2016-10-30	14.6	14.9	14.7	15	14.9	15	14.7		90	90	90	90	90	90	90	92
170824	17	0	48	1	2016-03-27	2016-04-27	2016-05-28	2016-06-29	2016-07-30	2016-08-29	2016-10-01	2016-10-30	16.8	17	17.2	17.4	17.1	16.7	16.9	17.2	90	90	90	90	90	90	90	90
170825	17	0	22	2	2016-03-27	2016-04-27	2016-05-28	2016-06-29	2016-07-30	2016-08-29	2016-10-01	2016-10-30	15.9	16.2	16	15.5	15.6	15.3	15.2	15.3	90	90	90	90	90	90	90	90
170826	17	0	51	1	2016-03-27	2016-04-27	2016-05-28	2016-06-29	2016-07-30	2016-08-29	2016-10-01	2016-10-30	16.4	16.1	16.4	16.9	17	16.6	16.2	15.2	90	90	90	90	90	90	90	90
170827	17	0	36	1	2016-03-27	2016-04-27	2016-05-28	2016-06-29	2016-07-30	2016-08-29	2016-10-01	2016-10-30	13.5	14.3							90	90	92	92	92	92	92	92
170828	17	0	39	2	2016-03-27	2016-04-27	2016-05-28	2016-06-29	2016-07-30	2016-08-29	2016-10-01	2016-10-30	15.9	15.4	15.7	15.8		16	15.7	15.6	90	90	90	90	92	90	90	90
170829	17	0	43	1	2016-03-27	2016-04-27	2016-05-28	2016-06-29	2016-07-30	2016-08-29	2016-10-01	2016-10-30	16.6	17.1	17			16.6	16.3	16.4	90	90	90	91	92	90	90	90
170830	17	0	54	1	2016-03-27	2016-04-27	2016-05-28	2016-06-29	2016-07-30	2016-08-29	2016-10-01	2016-10-30	14.7	14.6	14.7						90	90	90	91	92	92	92	92
170831	17	0	53	2	2016-03-27	2016-04-27	2016-05-28	2016-06-29	2016-07-30	2016-08-29	2016-10-01	2016-10-30	14.8	15.3	14.9			15.1	15	15.2	90	90	90	91	92	90	90	90
170832	17	0	15	2	2016-03-27	2016-04-27	2016-05-28	2016-06-29	2016-07-30	2016-08-29	2016-10-01	2016-10-30	14.5		15.5	16.2		15.7	16.2		90	94	90	90	94	90	90	93
170833	17	0	52	2	2016-03-27	2016-04-27	2016-05-28	2016-06-29	2016-07-30	2016-08-29	2016-10-01	2016-10-30	17.8	17.3	17.5	16.8	16.9	17	17.2		90	90	90	90	90	90	90	93
170834	17	0	46	2	2016-03-27	2016-04-27	2016-05-28	2016-06-29	2016-07-30	2016-08-29	2016-10-01	2016-10-30	16.4	16.8	16.4	16.1	15.9	15.5	15.2	16.6	90	90	90	90	90	90	90	90
170835	17	0	39	1	2016-03-27	2016-04-27	2016-05-28	2016-06-29	2016-07-30	2016-08-29	2016-10-01	2016-10-30	13.5		13.7	13.9	14.5	14.8	15.3	15.7	90	96	90	90	90	90	90	90
170836	17	0	28	2	2016-03-27	2016-04-27	2016-05-28	2016-06-29	2016-07-30	2016-08-29	2016-10-01	2016-10-30	14.5	15.3	15.4	15.2	15	14.9	15.2	15.2	90	90	90	90	90	90	90	90
170837	17	0	34	1	2016-03-27	2016-04-27	2016-05-28	2016-06-29	2016-07-30	2016-08-29	2016-10-01	2016-10-30	15.5	15.1	15	15.3		14.7	14.3		90	90	90	90	93	90	90	93
170838	17	0	30	2	2016-03-27	2016-04-27	2016-05-28	2016-06-29	2016-07-30	2016-08-29	2016-10-01	2016-10-30	15.4	15	14.9		15	14.8			90	90	90	91	90	90	91	92
170839	17	0	18	1	2016-03-27	2016-04-27	2016-05-28	2016-06-29	2016-07-30	2016-08-29	2016-10-01	2016-10-30	14.8	14.1	14.3		15.1	15.2			90	90	90	91	90	90	91	92
170840	17	0	54	2	2016-03-27	2016-04-27	2016-05-28	2016-06-29	2016-07-30	2016-08-29	2016-10-01	2016-10-30	14.1	14.1	14.3		14.5	14.7	14.3		90	90	90	91	90	90	90	92
90841	9	1	32	1	2016-03-27	2016-04-27	2016-05-28	2016-06-29	2016-07-30	2016-08-29	2016-10-01	2016-10-30	14	14.9	14.9	14.4	14.8	15	14.4	15	90	90	90	90	90	90	90	90
90842	9	1	13	2	2016-03-27	2016-04-27	2016-05-28	2016-06-29	2016-07-30	2016-08-29	2016-10-01	2016-10-30	14.6	15.1	14.8	15.4	15.5	16	15.4	15.9	90	90	90	90	90	90	90	90
90843	9	1	26	1	2016-03-27	2016-04-27	2016-05-28	2016-06-29	2016-07-30	2016-08-29	2016-10-01	2016-10-30	14.5	15	14.6	14	13	13.2	13.6	14.2	90	90	90	90	90	90	90	90
90844	9	1	38	2	2016-03-27	2016-04-27	2016-05-28	2016-06-29	2016-07-30	2016-08-29	2016-10-01	2016-10-30	14.9	14.9	15	14.5	14.9	14.5	14.6	14.5	90	90	90	90	90	90	90	90
90845	9	1	7	1	2016-03-27	2016-04-27	2016-05-28	2016-06-29	2016-07-30	2016-08-29	2016-10-01	2016-10-30	13.3	12.8		13.6	13.6	13.7	13.7	13.9	90	90	94	90	90	90	90	90
90846	9	1	46	2	2016-03-27	2016-04-27	2016-05-28	2016-06-29	2016-07-30	2016-08-29	2016-10-01	2016-10-30	15.5	15	15.5	15.4	15.5	15.7		15.5	90	90	90	90	90	90	93	90
20847	2	1	15	2	2016-03-27	2016-04-27	2016-05-28	2016-06-29	2016-07-30	2016-08-29	2016-10-01	2016-10-30	13.9	12.9							90	90	93	93	93	93	92	92
20848	2	1	17	1	2016-03-27	2016-04-27	2016-05-28	2016-06-29	2016-07-30	2016-08-29	2016-10-01	2016-10-30	13.6	13	13		12.9	13.5	13.9	14.6	90	90	90	96	90	90	90	90
20849	2	1	33	1	2016-03-27	2016-04-27	2016-05-28	2016-06-29	2016-07-30	2016-08-29	2016-10-01	2016-10-30	13.9	14.1	14.1	13.9	13.9	14.5	14.7	14.3	90	90	90	90	90	90	90	90
20850	2	1	48	1	2016-03-27	2016-04-27	2016-05-28	2016-06-29	2016-07-30	2016-08-29	2016-10-01	2016-10-30	14.2	14.2	13.9	14	13.8	14	14.1	14.6	90	90	90	90	90	90	90	90
20851	2	1	50	1	2016-03-27	2016-04-27	2016-05-28	2016-06-29	2016-07-30	2016-08-29	2016-10-01	2016-10-30	13.7	13.5	14	14.2	14.3	14.4	14.3	14.5	90	90	90	90	90	90	90	90
20852	2	1	11	1	2016-03-27	2016-04-27	2016-05-28	2016-06-29	2016-07-30	2016-08-29	2016-10-01	2016-10-30	12	12.1	11.8						90	90	90	92	92	92	92	92
20853	2	1	20	2	2016-03-27	2016-04-27	2016-05-28	2016-06-29	2016-07-30	2016-08-29	2016-10-01	2016-10-30	13.2	12.5				14.7	14.3		90	90	94	94	94	90	90	92
20854	2	1	34	2	2016-03-27	2016-04-27	2016-05-28	2016-06-29	2016-07-30	2016-08-29	2016-10-01	2016-10-30	13.4	14.4	13.6						90	90	90	92	92	92	92	92
20855	2	1	9	1	2016-03-27	2016-04-27	2016-05-28	2016-06-29	2016-07-30	2016-08-29	2016-10-01	2016-10-30	13.5	14.1	12.9						90	90	90	92	92	92	92	92
20856	2	1	19	1	2016-03-27	2016-04-27	2016-05-28	2016-06-29	2016-07-30	2016-08-29	2016-10-01	2016-10-30	15.4	14.6	14.6	14.2	14.6	14.9	14.1	14.6	90	90	90	90	90	90	90	90
20857	2	1	27	1	2016-03-27	2016-04-27	2016-05-28	2016-06-29	2016-07-30	2016-08-29	2016-10-01	2016-10-30	15.1	15.3	15.1	14.7	15.1	15.5	14.9	14.9	90	90	90	90	90	90	90	90
20858	2	1	39	1	2016-03-27	2016-04-27	2016-05-28	2016-06-29	2016-07-30	2016-08-29	2016-10-01	2016-10-30	14.9	14.4	13.9	14	13.8	13.9	13.5	14.1	90	90	90	90	90	90	90	90
20859	2	1	29	1	2016-03-27	2016-04-27	2016-05-28	2016-06-29	2016-07-30	2016-08-29	2016-10-01	2016-10-30	13.9	12.7	12.8	13.2	14.6	14.4	14.6	14.8	90	90	90	90	90	90	90	90
20860	2	1	31	1	2016-03-27	2016-04-27	2016-05-28	2016-06-29	2016-07-30	2016-08-29	2016-10-01	2016-10-30	13.9	13.2	13.4	13.6	13.6	13.7	13.6		90	90	90	90	90	90	90	94
30861	3	1	11	1	2016-03-27	2016-04-27	2016-05-28	2016-06-29	2016-07-30	2016-08-29	2016-10-01	2016-10-30	13.4	13.5	13.3	13.5	13.9	13	14	13.8	90	90	90	90	90	90	90	90
30862	3	1	33	2	2016-03-27	2016-04-27	2016-05-28	2016-06-29	2016-07-30	2016-08-29	2016-10-01	2016-10-30	13.5					16	15.5	15.9	90	92	92	92	92	90	90	90
30863	3	1	47	1	2016-03-27	2016-04-27	2016-05-28	2016-06-29	2016-07-30	2016-08-29	2016-10-01	2016-10-30	16.3	15.8	16.1	16	16.4	16.3	16	15.8	90	90	90	90	90	90	90	90
30864	3	1	35	2	2016-03-27	2016-04-27	2016-05-28	2016-06-29	2016-07-30	2016-08-29	2016-10-01	2016-10-30	15.8	15.5	16	16.1	16.3	16.4	16.7	16.3	90	90	90	90	90	90	90	90
30865	3	1	44	2	2016-03-27	2016-04-27	2016-05-28	2016-06-29	2016-07-30	2016-08-29	2016-10-01	2016-10-30	14.3		14.2						90	91	90	92	92	92	92	92
30866	3	1	12	1	2016-03-27	2016-04-27	2016-05-28	2016-06-29	2016-07-30	2016-08-29	2016-10-01	2016-10-30	11.8		11.4						90	91	90	92	92	92	92	92
30867	3	1	41	1	2016-03-27	2016-04-27	2016-05-28	2016-06-29	2016-07-30	2016-08-29	2016-10-01	2016-10-30	15.9	15.9	15.8	16.2	16.5	15.9		15.7	90	90	90	90	90	90	93	90
30868	3	1	51	2	2016-03-27	2016-04-27	2016-05-28	2016-06-29	2016-07-30	2016-08-29	2016-10-01	2016-10-30	13.8	13	13.2	13.5	14	13.9	13.8	14	90	90	90	90	90	90	90	90
30869	3	1	40	1	2016-03-27	2016-04-27	2016-05-28	2016-06-29	2016-07-30	2016-08-29	2016-10-01	2016-10-30	14.5	14.2	14.1	14.5	14.4	14	14.2	14.5	90	90	90	90	90	90	90	90
30870	3	1	47	2	2016-03-27	2016-04-27	2016-05-28	2016-06-29	2016-07-30	2016-08-29	2016-10-01	2016-10-30	16.4	16.2	15.8	15.5	16.3	16.5	16.3	16	90	90	90	90	90	90	90	90
30871	3	1	17	2	2016-03-27	2016-04-27	2016-05-28	2016-06-29	2016-07-30	2016-08-29	2016-10-01	2016-10-30	15.2	14.5	14.2	14.3	15.1	15.2	15.7	15.9	90	90	90	90	90	90	90	90
30872	3	1	16	2	2016-03-27	2016-04-27	2016-05-28	2016-06-29	2016-07-30	2016-08-29	2016-10-01	2016-10-30	13.4	13.5	14	13.5	13.7	14.1	14.9	15.2	90	90	90	90	90	90	90	90
30873	3	1	34	2	2016-03-27	2016-04-27	2016-05-28	2016-06-29	2016-07-30	2016-08-29	2016-10-01	2016-10-30	15.1	14.6	14	14.3	14.2	14.6	14.5	14.9	90	90	90	90	90	90	90	90
30874	3	1	8	1	2016-03-27	2016-04-27	2016-05-28	2016-06-29	2016-07-30	2016-08-29	2016-10-01	2016-10-30	14	13	13.5	13.8	13.5	13.7	13.9	13.5	90	90	90	90	90	90	90	90
30875	3	1	44	2	2016-03-27	2016-04-27	2016-05-28	2016-06-29	2016-07-30	2016-08-29	2016-10-01	2016-10-30	14	13.5	13.5	14.5	15.2	14.6			90	90	90	90	90	90	93	93
30876	3	1	18	2	2016-03-27	2016-04-27	2016-05-28	2016-06-29	2016-07-30	2016-08-29	2016-10-01	2016-10-30	13.5	13.8	13.4	13.4	13.7	13.5	13.7	13.5	90	90	90	90	90	90	90	90
30877	3	1	36	2	2016-03-27	2016-04-27	2016-05-28	2016-06-29	2016-07-30	2016-08-29	2016-10-01	2016-10-30	16.1	15.3	15.4	15.6	15.5	16.2	16	16.1	90	90	90	90	90	90	90	90
30878	3	1	24	1	2016-03-27	2016-04-27	2016-05-28	2016-06-29	2016-07-30	2016-08-29	2016-10-01	2016-10-30	14.3	13.6	13.4		15	15.7	15.6	15.8	90	90	90	93	90	90	90	90
30879	3	1	24	2	2016-03-27	2016-04-27	2016-05-28	2016-06-29	2016-07-30	2016-08-29	2016-10-01	2016-10-30	13.5	13.2	12.1			13.5	14	14.5	90	90	90	93	96	90	90	90
30880	3	1	48	2	2016-03-27	2016-04-27	2016-05-28	2016-06-29	2016-07-30	2016-08-29	2016-10-01	2016-10-30	14.1	14.1		14.4	15	14.7	14.8	14.5	90	90	91	90	90	90	90	90
70881	7	1	35	1	2016-03-27	2016-04-27	2016-05-28	2016-06-29	2016-07-30	2016-08-29	2016-10-01	2016-10-30	14.2	14.6	13.6	14.3	15.6	16.2	14.6	14.7	90	90	90	90	90	90	90	90
70882	7	1	50	1	2016-03-27	2016-04-27	2016-05-28	2016-06-29	2016-07-30	2016-08-29	2016-10-01	2016-10-30	12.6	12.2	12.9	13.4	13.2	12.9	13.2	12.9	90	90	90	90	90	90	90	90
70883	7	1	55	1	2016-03-27	2016-04-27	2016-05-28	2016-06-29	2016-07-30	2016-08-29	2016-10-01	2016-10-30	14.6	14.5	15.9	15.6	15.4	15.7	15.7	15.6	90	90	90	90	90	90	90	90
70884	7	1	40	2	2016-03-27	2016-04-27	2016-05-28	2016-06-29	2016-07-30	2016-08-29	2016-10-01	2016-10-30	15.1	14.9	15.6	15.9	16.2	15.7	16.5	16	90	90	90	90	90	90	90	90
70885	7	1	33	1	2016-03-27	2016-04-27	2016-05-28	2016-06-29	2016-07-30	2016-08-29	2016-10-01	2016-10-30	15.4	15.2	14.8	14.7	14.9	14.7	15.3	14.9	90	90	90	90	90	90	90	90
70886	7	1	15	2	2016-03-27	2016-04-27	2016-05-28	2016-06-29	2016-07-30	2016-08-29	2016-10-01	2016-10-30	13.3	13.5	13.9	14.4	14.6	13.1	13.8	13.4	90	90	90	90	90	90	90	90
70887	7	1	34	1	2016-03-27	2016-04-27	2016-05-28	2016-06-29	2016-07-30	2016-08-29	2016-10-01	2016-10-30	13.7	13.9	13.9	14.1	14.4	14.3	14.1	13.9	90	90	90	90	90	90	90	90
70888	7	1	7	2	2016-03-27	2016-04-27	2016-05-28	2016-06-29	2016-07-30	2016-08-29	2016-10-01	2016-10-30	12.1	11.5	12.3	13.7	13.6	13.9	13.7	13.1	90	90	90	90	90	90	90	90
70889	7	1	28	2	2016-03-27	2016-04-27	2016-05-28	2016-06-29	2016-07-30	2016-08-29	2016-10-01	2016-10-30	13.4	14.1							90	90	93	93	93	93	95	95
70890	7	1	39	2	2016-03-27	2016-04-27	2016-05-28	2016-06-29	2016-07-30	2016-08-29	2016-10-01	2016-10-30	13.6	14.1	14.3	14.4	14.6	14.3	14.4	14.2	90	90	90	90	90	90	90	90
70891	7	1	29	1	2016-03-27	2016-04-27	2016-05-28	2016-06-29	2016-07-30	2016-08-29	2016-10-01	2016-10-30	13.1	13.1	13.4	13.9	13.8	14.1	14.6	13.9	90	90	90	90	90	90	90	90
70892	7	1	7	1	2016-03-27	2016-04-27	2016-05-28	2016-06-29	2016-07-30	2016-08-29	2016-10-01	2016-10-30	12.4	12.2	11.8	12	13.4	13.3	13.7	14.5	90	90	90	90	90	90	90	90
70893	7	1	24	2	2016-03-27	2016-04-27	2016-05-28	2016-06-29	2016-07-30	2016-08-29	2016-10-01	2016-10-30	13.6	13.9	13.9	14.2	14.2	14.3	14.4	15.4	90	90	90	90	90	90	90	90
70894	7	1	28	1	2016-03-27	2016-04-27	2016-05-28	2016-06-29	2016-07-30	2016-08-29	2016-10-01	2016-10-30	13.6	13	13.3	13.8	14.4	13.7	14.3	14.1	90	90	90	90	90	90	90	90
70895	7	1	38	1	2016-03-27	2016-04-27	2016-05-28	2016-06-29	2016-07-30	2016-08-29	2016-10-01	2016-10-30	12.6	12.6	13.3	13.7	12.4				90	90	90	90	90	93	93	93
70896	7	1	45	1	2016-03-27	2016-04-27	2016-05-28	2016-06-29	2016-07-30	2016-08-29	2016-10-01	2016-10-30	15.6		16.1	16.4	16	15.1	16.1	15.9	90	91	90	90	90	90	90	90
70897	7	1	20	2	2016-03-27	2016-04-27	2016-05-28	2016-06-29	2016-07-30	2016-08-29	2016-10-01	2016-10-30	11.5	10.2							90	90	95	95	95	95	95	95
70898	7	1	50	2	2016-03-27	2016-04-27	2016-05-28	2016-06-29	2016-07-30	2016-08-29	2016-10-01	2016-10-30	14.8	14.2	14.7	14.4	15.2	15.1	15.4	15.3	90	90	90	90	90	90	90	90
70899	7	1	11	1	2016-03-27	2016-04-27	2016-05-28	2016-06-29	2016-07-30	2016-08-29	2016-10-01	2016-10-30	14.6	14.2	14.6	14.4	14.3	12.9	13.4	13.8	90	90	90	90	90	90	90	90
70900	7	1	35	1	2016-03-27	2016-04-27	2016-05-28	2016-06-29	2016-07-30	2016-08-29	2016-10-01	2016-10-30	12.4	12.8	14.4	14.3	15.6	14.8	15.4	15.4	90	90	90	90	90	90	90	90
110901	11	0	45	2	2016-03-28	2016-04-30	2016-05-29	2016-06-29	2016-07-31	2016-08-30	2016-10-03	2016-10-31	12.1	12.5	12	12.5	12.6	12.5	12.6	13.5	90	90	90	90	90	90	90	90
110902	11	0	48	1	2016-03-28	2016-04-30	2016-05-29	2016-06-29	2016-07-31	2016-08-30	2016-10-03	2016-10-31	14.1	14.6	14.1	14	14.7	15.2	15	15.3	90	90	90	90	90	90	90	90
110903	11	0	13	1	2016-03-28	2016-04-30	2016-05-29	2016-06-29	2016-07-31	2016-08-30	2016-10-03	2016-10-31	10.5								90	92	92	92	92	92	92	92
110904	11	0	35	2	2016-03-28	2016-04-30	2016-05-29	2016-06-29	2016-07-31	2016-08-30	2016-10-03	2016-10-31	14.8								90	92	92	92	92	92	92	92
110905	11	0	46	1	2016-03-28	2016-04-30	2016-05-29	2016-06-29	2016-07-31	2016-08-30	2016-10-03	2016-10-31	15.3	15.2	14.2	13.6	14.8	14.5	14.6	15	90	90	90	90	90	90	90	90
110906	11	0	38	2	2016-03-28	2016-04-30	2016-05-29	2016-06-29	2016-07-31	2016-08-30	2016-10-03	2016-10-31	14.9	15.6	14.9	15	15.1	15.5	15.1	15.5	90	90	90	90	90	90	90	90
110907	11	0	24	1	2016-03-28	2016-04-30	2016-05-29	2016-06-29	2016-07-31	2016-08-30	2016-10-03	2016-10-31	16.5	16.7	16.4	16.5	16.6	17.4	16.5	16.7	90	90	90	90	90	90	90	90
110908	11	0	12	2	2016-03-28	2016-04-30	2016-05-29	2016-06-29	2016-07-31	2016-08-30	2016-10-03	2016-10-31	13.4								90	95	95	95	95	95	95	95
110909	11	0	50	2	2016-03-28	2016-04-30	2016-05-29	2016-06-29	2016-07-31	2016-08-30	2016-10-03	2016-10-31	15.9	17	16	15.9	16.5	16.5	17		90	90	90	90	90	90	90	93
110910	11	0	25	1	2016-03-28	2016-04-30	2016-05-29	2016-06-29	2016-07-31	2016-08-30	2016-10-03	2016-10-31	12								90	91	91	91	95	95	95	95
110911	11	0	36	2	2016-03-28	2016-04-30	2016-05-29	2016-06-29	2016-07-31	2016-08-30	2016-10-03	2016-10-31	17	17.3	16.5	16.7	17.8	16.7	16.5		90	90	90	90	90	90	90	93
110912	11	0	12	1	2016-03-28	2016-04-30	2016-05-29	2016-06-29	2016-07-31	2016-08-30	2016-10-03	2016-10-31	14.6	15.6	15.4	15	14.5	15.5	15.6		90	90	90	90	90	90	90	93
110913	11	0	48	2	2016-03-28	2016-04-30	2016-05-29	2016-06-29	2016-07-31	2016-08-30	2016-10-03	2016-10-31	14.7	15.1	14.3	14.4		14.7	15	15.3	90	90	90	90	93	90	90	90
110914	11	0	36	2	2016-03-28	2016-04-30	2016-05-29	2016-06-29	2016-07-31	2016-08-30	2016-10-03	2016-10-31	16.4	16	15.3	15.5		14.5	15	16.6	90	90	90	90	93	90	90	90
110915	11	0	12	2	2016-03-28	2016-04-30	2016-05-29	2016-06-29	2016-07-31	2016-08-30	2016-10-03	2016-10-31	14.5	14.7	14.2	14		14.6	14.8	15	90	90	90	90	93	90	90	90
110916	11	0	38	1	2016-03-28	2016-04-30	2016-05-29	2016-06-29	2016-07-31	2016-08-30	2016-10-03	2016-10-31	16.4	16.9	16.4	16.2	16.7	16.6	16	16.4	90	90	90	90	90	90	90	90
110917	11	0	39	2	2016-03-28	2016-04-30	2016-05-29	2016-06-29	2016-07-31	2016-08-30	2016-10-03	2016-10-31	14.1	15.7	15.5	15.3	15.8	15.6	15.5	15.6	90	90	90	90	90	90	90	90
110918	11	0	9	1	2016-03-28	2016-04-30	2016-05-29	2016-06-29	2016-07-31	2016-08-30	2016-10-03	2016-10-31	14.9	12.4	11.8	11.7	12.1	12	12.6	12.7	90	90	90	90	90	90	90	90
110919	11	0	24	1	2016-03-28	2016-04-30	2016-05-29	2016-06-29	2016-07-31	2016-08-30	2016-10-03	2016-10-31	14	14.2	14	14.1					90	90	90	90	93	92	92	92
110920	11	0	12	1	2016-03-28	2016-04-30	2016-05-29	2016-06-29	2016-07-31	2016-08-30	2016-10-03	2016-10-31	11.5	11.4	10.7	11.5					90	90	90	90	93	92	92	92
130921	13	0	35	2	2016-03-28	2016-04-30	2016-05-29	2016-06-29	2016-07-31	2016-08-30	2016-10-03	2016-10-31	15.3	14.9	15.1		15				90	90	90	91	90	91	93	94
130922	13	0	43	1	2016-03-28	2016-04-30	2016-05-29	2016-06-29	2016-07-31	2016-08-30	2016-10-03	2016-10-31	16	14.8	15.5	15.7	14.9	15.2	15.5	15.3	90	90	90	90	90	90	90	90
130923	13	0	41	2	2016-03-28	2016-04-30	2016-05-29	2016-06-29	2016-07-31	2016-08-30	2016-10-03	2016-10-31	16.8	17	16.2	16.7	16.5	16.7	17.5	17	90	90	90	90	90	90	90	90
130924	13	0	46	2	2016-03-28	2016-04-30	2016-05-29	2016-06-29	2016-07-31	2016-08-30	2016-10-03	2016-10-31	14.8	14.8	14.6	14.9	14.4	12.8	13.5	15	90	90	90	90	90	90	90	90
130925	13	0	30	2	2016-03-28	2016-04-30	2016-05-29	2016-06-29	2016-07-31	2016-08-30	2016-10-03	2016-10-31	15	14.5	14	14.1	14.2	15.1	14.7	15	90	90	90	90	90	90	90	90
130926	13	0	34	2	2016-03-28	2016-04-30	2016-05-29	2016-06-29	2016-07-31	2016-08-30	2016-10-03	2016-10-31	14.5	13.5	14.2	14	14.3	15.5	15.2	15.7	90	90	90	90	90	90	90	90
130927	13	0	30	1	2016-03-28	2016-04-30	2016-05-29	2016-06-29	2016-07-31	2016-08-30	2016-10-03	2016-10-31	15.3								90	92	92	92	92	92	92	92
130928	13	0	42	2	2016-03-28	2016-04-30	2016-05-29	2016-06-29	2016-07-31	2016-08-30	2016-10-03	2016-10-31	14.5								90	92	92	92	92	92	92	92
130929	13	0	32	1	2016-03-28	2016-04-30	2016-05-29	2016-06-29	2016-07-31	2016-08-30	2016-10-03	2016-10-31	16	16.7	16.5		16.2	16.3	16.5	16.3	90	90	90	91	90	90	90	90
130930	13	0	20	2	2016-03-28	2016-04-30	2016-05-29	2016-06-29	2016-07-31	2016-08-30	2016-10-03	2016-10-31	12.6	12.9	12.5					13	90	90	90	91	91	91	93	90
130931	13	0	12	1	2016-03-28	2016-04-30	2016-05-29	2016-06-29	2016-07-31	2016-08-30	2016-10-03	2016-10-31	12.8	13	13.5	13		12.9	12.4	12.9	90	90	90	90	91	90	90	90
130932	13	0	33	2	2016-03-28	2016-04-30	2016-05-29	2016-06-29	2016-07-31	2016-08-30	2016-10-03	2016-10-31	12.9	13.3	13	13.2	12.9	14.3	14.4		90	90	90	90	90	90	90	91
130933	13	0	32	2	2016-03-28	2016-04-30	2016-05-29	2016-06-29	2016-07-31	2016-08-30	2016-10-03	2016-10-31	14								90	95	95	95	95	95	95	95
130934	13	0	20	1	2016-03-28	2016-04-30	2016-05-29	2016-06-29	2016-07-31	2016-08-30	2016-10-03	2016-10-31	16.5	15.8	15.6	15.4	15.2	15.8	15.6	15.4	90	90	90	90	90	90	90	90
130935	13	0	19	1	2016-03-28	2016-04-30	2016-05-29	2016-06-29	2016-07-31	2016-08-30	2016-10-03	2016-10-31	14.3	14.4	14.2	13.8	14	14.7	14.6	15.2	90	90	90	90	90	90	90	90
130936	13	0	21	2	2016-03-28	2016-04-30	2016-05-29	2016-06-29	2016-07-31	2016-08-30	2016-10-03	2016-10-31	12.5	12.4	12.8		12.9	12.7	13.1	12.9	90	90	90	91	90	90	90	90
130937	13	0	34	1	2016-03-28	2016-04-30	2016-05-29	2016-06-29	2016-07-31	2016-08-30	2016-10-03	2016-10-31	13.8	15.4	16.4	16					90	90	90	90	91	95	95	95
130938	13	0	30	2	2016-03-28	2016-04-30	2016-05-29	2016-06-29	2016-07-31	2016-08-30	2016-10-03	2016-10-31	12.2	12.2		12.8	12.8	12.8	11.5	12	90	90	91	90	90	90	90	90
130939	13	0	19	2	2016-03-28	2016-04-30	2016-05-29	2016-06-29	2016-07-31	2016-08-30	2016-10-03	2016-10-31	9.6	9.5		8		10	10.7	11.5	90	90	91	90	94	90	90	90
130940	13	0	7	2	2016-03-28	2016-04-30	2016-05-29	2016-06-29	2016-07-31	2016-08-30	2016-10-03	2016-10-31	11.7	12.9	12.7	12.7	12.8	12.7	14	13.6	90	90	90	90	90	90	90	90
170941	17	0	21	1	2016-03-28	2016-04-30	2016-05-29	2016-06-29	2016-07-31	2016-08-30	2016-10-03	2016-10-31	13.5	14.1	14		14.2	14.8	15	15.1	90	90	90	91	90	90	90	90
170942	17	0	9	2	2016-03-28	2016-04-30	2016-05-29	2016-06-29	2016-07-31	2016-08-30	2016-10-03	2016-10-31	13.9	13.9	13.7	13.9	13.3	13	13.2	12.8	90	90	90	90	90	90	90	90
170943	17	0	26	2	2016-03-28	2016-04-30	2016-05-29	2016-06-29	2016-07-31	2016-08-30	2016-10-03	2016-10-31	15.1	14.4	14.2	14.5	14	14.4	14.6	14.3	90	90	90	90	90	90	90	90
170944	17	0	23	1	2016-03-28	2016-04-30	2016-05-29	2016-06-29	2016-07-31	2016-08-30	2016-10-03	2016-10-31	16	15.7	15.6	16.5	15.8	16	16.4	16.1	90	90	90	90	90	90	90	90
170945	17	0	8	1	2016-03-28	2016-04-30	2016-05-29	2016-06-29	2016-07-31	2016-08-30	2016-10-03	2016-10-31	14.6	14.2	14.4	14.1	14	13.8	13.6	13.4	90	90	90	90	90	90	90	90
170946	17	0	46	2	2016-03-28	2016-04-30	2016-05-29	2016-06-29	2016-07-31	2016-08-30	2016-10-03	2016-10-31	16.8	16.3	16.4	16.1	16.2	16.5	16.8	16.5	90	90	90	90	90	90	90	90
170947	17	0	27	2	2016-03-28	2016-04-30	2016-05-29	2016-06-29	2016-07-31	2016-08-30	2016-10-03	2016-10-31	15.4	15.4	16	15.9	16	15.9	16.2	16.6	90	90	90	90	90	90	90	90
170948	17	0	35	1	2016-03-28	2016-04-30	2016-05-29	2016-06-29	2016-07-31	2016-08-30	2016-10-03	2016-10-31	14.6	13	13.6	13.9	14.2	14	14.4	14.8	90	90	90	90	90	90	90	90
170949	17	0	26	2	2016-03-28	2016-04-30	2016-05-29	2016-06-29	2016-07-31	2016-08-30	2016-10-03	2016-10-31	14.8	14.6							90	90	93	93	93	91	92	92
170950	17	0	35	1	2016-03-28	2016-04-30	2016-05-29	2016-06-29	2016-07-31	2016-08-30	2016-10-03	2016-10-31	14.8	14.8	14.6	14.9	14.6	14.9	15		90	90	90	90	90	90	90	93
170951	17	0	8	1	2016-03-28	2016-04-30	2016-05-29	2016-06-29	2016-07-31	2016-08-30	2016-10-03	2016-10-31	11.7	11	11.2	11.8	12.6	13	13.5	13.8	90	90	90	90	90	90	90	90
170952	17	0	42	1	2016-03-28	2016-04-30	2016-05-29	2016-06-29	2016-07-31	2016-08-30	2016-10-03	2016-10-31	14.5	14.5	14.7		15		14.9		90	90	90	94	90	91	90	92
170953	17	0	32	2	2016-03-28	2016-04-30	2016-05-29	2016-06-29	2016-07-31	2016-08-30	2016-10-03	2016-10-31	15.9	16.1	16.4	16.1	16.4	15.9	16.4	16.8	90	90	90	90	90	90	90	90
170954	17	0	36	2	2016-03-28	2016-04-30	2016-05-29	2016-06-29	2016-07-31	2016-08-30	2016-10-03	2016-10-31	13.6	14.2	13.8	13.9	14	14.2			90	90	90	90	90	90	94	93
170955	17	0	35	2	2016-03-28	2016-04-30	2016-05-29	2016-06-29	2016-07-31	2016-08-30	2016-10-03	2016-10-31	13.6	14	14.2	13.3					90	90	90	90	91	91	92	92
170956	17	0	17	2	2016-03-28	2016-04-30	2016-05-29	2016-06-29	2016-07-31	2016-08-30	2016-10-03	2016-10-31	13.3	13.4	13.5	13.6	13.9	13.7	13.3	13.8	90	90	90	90	90	90	90	90
170957	17	0	35	2	2016-03-28	2016-04-30	2016-05-29	2016-06-29	2016-07-31	2016-08-30	2016-10-03	2016-10-31	12.3	12.4	12.6	12.7	12.9	12.6	12.4	13	90	90	90	90	90	90	90	90
170958	17	0	32	2	2016-03-28	2016-04-30	2016-05-29	2016-06-29	2016-07-31	2016-08-30	2016-10-03	2016-10-31	14.8	15	15.3	15.5	15.2	15.4	15	16	90	90	90	90	90	90	90	90
170959	17	0	18	1	2016-03-28	2016-04-30	2016-05-29	2016-06-29	2016-07-31	2016-08-30	2016-10-03	2016-10-31	14.9	12.2	12.4	12.5	12.7	12.6			90	90	90	90	90	90	93	93
170960	17	0	33	1	2016-03-28	2016-04-30	2016-05-29	2016-06-29	2016-07-31	2016-08-30	2016-10-03	2016-10-31	13.8	13.9	14	13.9	14.1	14.2	14.6	14.8	90	90	90	90	90	90	90	90
20961	2	1	47	2	2016-03-28	2016-04-30	2016-05-29	2016-06-29	2016-07-31	2016-08-30	2016-10-03	2016-10-31	14.7	15.6	15.5		15.7	15.9	15.5	15.4	90	90	90	91	90	90	90	90
20962	2	1	10	1	2016-03-28	2016-04-30	2016-05-29	2016-06-29	2016-07-31	2016-08-30	2016-10-03	2016-10-31	14.2	14.1	15	14	14.2	14.6	15.1	14.9	90	90	90	90	90	90	90	90
20963	2	1	45	2	2016-03-28	2016-04-30	2016-05-29	2016-06-29	2016-07-31	2016-08-30	2016-10-03	2016-10-31	15	15.6	16.1	15.5	15.3	15.8	15	14.9	90	90	90	90	90	90	90	90
20964	2	1	34	1	2016-03-28	2016-04-30	2016-05-29	2016-06-29	2016-07-31	2016-08-30	2016-10-03	2016-10-31	14.2	15.4	15.5	15.4	15.2	15.6	15.5	15.4	90	90	90	90	90	90	90	90
20965	2	1	19	2	2016-03-28	2016-04-30	2016-05-29	2016-06-29	2016-07-31	2016-08-30	2016-10-03	2016-10-31	15	15.3	13.7	13.9	14.3	14.2	14	14.2	90	90	90	90	90	90	90	90
20966	2	1	46	2	2016-03-28	2016-04-30	2016-05-29	2016-06-29	2016-07-31	2016-08-30	2016-10-03	2016-10-31	13.1	13	12.6	13.3	13.4	13.3	13.4	13.8	90	90	90	90	90	90	90	90
20967	2	1	23	2	2016-03-28	2016-04-30	2016-05-29	2016-06-29	2016-07-31	2016-08-30	2016-10-03	2016-10-31	13	12.8	13.4						90	90	90	92	92	92	92	92
20968	2	1	47	1	2016-03-28	2016-04-30	2016-05-29	2016-06-29	2016-07-31	2016-08-30	2016-10-03	2016-10-31	15.3	14.3	14.3	14.1	14.6	14.7	13.8	14.6	90	90	90	90	90	90	90	90
20969	2	1	21	1	2016-03-28	2016-04-30	2016-05-29	2016-06-29	2016-07-31	2016-08-30	2016-10-03	2016-10-31	14.5	13.8	13.2	13.1	13.5	13.8	13.6	13	90	90	90	90	90	90	90	90
20970	2	1	45	1	2016-03-28	2016-04-30	2016-05-29	2016-06-29	2016-07-31	2016-08-30	2016-10-03	2016-10-31	18.8	17.5	17.9	18.4	17.9	17.4	16.7	16.9	90	90	90	90	90	90	90	90
20971	2	1	28	1	2016-03-28	2016-04-30	2016-05-29	2016-06-29	2016-07-31	2016-08-30	2016-10-03	2016-10-31	16.6	16.1	16.8	16.1	17	16.5	16.2	16.5	90	90	90	90	90	90	90	90
20972	2	1	39	1	2016-03-28	2016-04-30	2016-05-29	2016-06-29	2016-07-31	2016-08-30	2016-10-03	2016-10-31	14	13.5	13.8	13.8	14.2	13.9	14	13.9	90	90	90	90	90	90	90	90
20973	2	1	17	2	2016-03-28	2016-04-30	2016-05-29	2016-06-29	2016-07-31	2016-08-30	2016-10-03	2016-10-31	12.2	11.5	11.5	12	11.8	11.9	11.7	12	90	90	90	90	90	90	90	90
20974	2	1	44	1	2016-03-28	2016-04-30	2016-05-29	2016-06-29	2016-07-31	2016-08-30	2016-10-03	2016-10-31	14.9	13.4	14	14.1	13.9				90	90	90	90	90	93	92	92
20975	2	1	34	2	2016-03-28	2016-04-30	2016-05-29	2016-06-29	2016-07-31	2016-08-30	2016-10-03	2016-10-31	14.6	14.1	14.5	14.5	14.6				90	90	90	90	90	93	92	92
20976	2	1	37	2	2016-03-28	2016-04-30	2016-05-29	2016-06-29	2016-07-31	2016-08-30	2016-10-03	2016-10-31	14.2	13.4	13.4	13.9	14.1	14.4	14.1	14.1	90	90	90	90	90	90	90	90
20977	2	1	38	1	2016-03-28	2016-04-30	2016-05-29	2016-06-29	2016-07-31	2016-08-30	2016-10-03	2016-10-31	14.6	14.7	13.8	14.5	14.6	15	15.4	15.8	90	90	90	90	90	90	90	90
20978	2	1	18	1	2016-03-28	2016-04-30	2016-05-29	2016-06-29	2016-07-31	2016-08-30	2016-10-03	2016-10-31	11.7	11.4	11.6	11.1	11.4	11.9	12.4	12.6	90	90	90	90	90	90	90	90
20979	2	1	38	2	2016-03-28	2016-04-30	2016-05-29	2016-06-29	2016-07-31	2016-08-30	2016-10-03	2016-10-31	11.7	10.8							90	90	95	95	95	95	95	95
20980	2	1	18	1	2016-03-28	2016-04-30	2016-05-29	2016-06-29	2016-07-31	2016-08-30	2016-10-03	2016-10-31	15.4	15.2	15.6						90	90	90	93	93	93	92	92
30981	3	1	22	1	2016-03-28	2016-04-30	2016-05-29	2016-06-29	2016-07-31	2016-08-30	2016-10-03	2016-10-31	15.5	14.7	14.2	14.8	15.1	15.2	14.5	14.9	90	90	90	90	90	90	90	90
30982	3	1	40	2	2016-03-28	2016-04-30	2016-05-29	2016-06-29	2016-07-31	2016-08-30	2016-10-03	2016-10-31	15.4	15	15.1	14.5	16.5	15.8	15.7	15.8	90	90	90	90	90	90	90	90
30983	3	1	59	2	2016-03-28	2016-04-30	2016-05-29	2016-06-29	2016-07-31	2016-08-30	2016-10-03	2016-10-31	16.2	15.3	14.6	14.7	15	15.7	14.5	15	90	90	90	90	90	90	90	90
30984	3	1	30	1	2016-03-28	2016-04-30	2016-05-29	2016-06-29	2016-07-31	2016-08-30	2016-10-03	2016-10-31	12.8	12	12.4	13	13.5	13	13.1	13.5	90	90	90	90	90	90	90	90
30985	3	1	50	2	2016-03-28	2016-04-30	2016-05-29	2016-06-29	2016-07-31	2016-08-30	2016-10-03	2016-10-31	13.4	13.2	13.3	13.2	13	13.1	13.2	13.2	90	90	90	90	90	90	90	90
30986	3	1	27	1	2016-03-28	2016-04-30	2016-05-29	2016-06-29	2016-07-31	2016-08-30	2016-10-03	2016-10-31	15.2	14.8	14.7	15.1	15.2	15.5	15.4	14.8	90	90	90	90	90	90	90	90
30987	3	1	24	2	2016-03-28	2016-04-30	2016-05-29	2016-06-29	2016-07-31	2016-08-30	2016-10-03	2016-10-31	12.2	11.8	12.7	12.9	13.6	12.9	13.5	14	90	90	90	90	90	90	90	90
30988	3	1	14	2	2016-03-28	2016-04-30	2016-05-29	2016-06-29	2016-07-31	2016-08-30	2016-10-03	2016-10-31	13	12.3	12.1	12.8	13.8	13.3	13	13.5	90	90	90	90	90	90	90	90
30989	3	1	20	1	2016-03-28	2016-04-30	2016-05-29	2016-06-29	2016-07-31	2016-08-30	2016-10-03	2016-10-31	12.7	13.2	13	14.5	14.5	14	14.2	14.9	90	90	90	90	90	90	90	90
30990	3	1	17	1	2016-03-28	2016-04-30	2016-05-29	2016-06-29	2016-07-31	2016-08-30	2016-10-03	2016-10-31	13.5	13.6	12.8	13.4	14.5	13.9	13.8	14.6	90	90	90	90	90	90	90	90
30991	3	1	31	1	2016-03-28	2016-04-30	2016-05-29	2016-06-29	2016-07-31	2016-08-30	2016-10-03	2016-10-31	14.5	14.7	14.5	14.8	14.9	14.8	14.4	15.5	90	90	90	90	90	90	90	90
30992	3	1	24	1	2016-03-28	2016-04-30	2016-05-29	2016-06-29	2016-07-31	2016-08-30	2016-10-03	2016-10-31	15.8	15.1							90	90	92	92	92	92	92	92
30993	3	1	9	1	2016-03-28	2016-04-30	2016-05-29	2016-06-29	2016-07-31	2016-08-30	2016-10-03	2016-10-31	13.5	14	13.8	13.5	14	14.5	13.9	14	90	90	90	90	90	90	90	90
30994	3	1	36	2	2016-03-28	2016-04-30	2016-05-29	2016-06-29	2016-07-31	2016-08-30	2016-10-03	2016-10-31	13.2	13.4	13.3	13.4	13	13.2			90	90	90	90	90	90	92	92
30995	3	1	8	1	2016-03-28	2016-04-30	2016-05-29	2016-06-29	2016-07-31	2016-08-30	2016-10-03	2016-10-31	14.5	13.6	14	13	12.3	13	13.4	14	90	90	90	90	90	90	90	90
30996	3	1	42	2	2016-03-28	2016-04-30	2016-05-29	2016-06-29	2016-07-31	2016-08-30	2016-10-03	2016-10-31	13.1	13.2	13.1	13.4	13.6	14		13.4	90	90	90	90	90	90	92	90
30997	3	1	7	2	2016-03-28	2016-04-30	2016-05-29	2016-06-29	2016-07-31	2016-08-30	2016-10-03	2016-10-31	12.5	11.5	11.6	12.5	12.6	12.8		13.9	90	90	90	90	90	90	92	90
30998	3	1	12	1	2016-03-28	2016-04-30	2016-05-29	2016-06-29	2016-07-31	2016-08-30	2016-10-03	2016-10-31	13.5	12.4	12.3	12.2	12.4	13	12.5	13	90	90	90	90	90	90	90	90
30999	3	1	29	1	2016-03-28	2016-04-30	2016-05-29	2016-06-29	2016-07-31	2016-08-30	2016-10-03	2016-10-31	14.6	14.2	14.5	14.1	14.2	14.4	14.3	14.5	90	90	90	90	90	90	90	90
31000	3	1	48	2	2016-03-28	2016-04-30	2016-05-29	2016-06-29	2016-07-31	2016-08-30	2016-10-03	2016-10-31	14.8	14.3	14.5	13.5	14.5	14.6	13.5	15	90	90	90	90	90	90	90	90
71001	7	1	12	2	2016-03-28	2016-04-30	2016-05-29	2016-06-29	2016-07-31	2016-08-30	2016-10-03	2016-10-31	14.9	15.8	14.9	14.9	14.7	14.9	15.2	15.3	90	90	90	90	90	90	90	90
71002	7	1	40	2	2016-03-28	2016-04-30	2016-05-29	2016-06-29	2016-07-31	2016-08-30	2016-10-03	2016-10-31	15.6	16.2	16.4	16	16.2	16.2	16.1	15.9	90	90	90	90	90	90	90	90
71003	7	1	11	2	2016-03-28	2016-04-30	2016-05-29	2016-06-29	2016-07-31	2016-08-30	2016-10-03	2016-10-31	13.7		12.9	13.6	13	13.6		14.2	90	91	90	90	90	90	94	90
71004	7	1	54	1	2016-03-28	2016-04-30	2016-05-29	2016-06-29	2016-07-31	2016-08-30	2016-10-03	2016-10-31	16.1	15.8	15.7	14.5	14.7	14.3	14.4	15	90	90	90	90	90	90	90	90
71005	7	1	17	2	2016-03-28	2016-04-30	2016-05-29	2016-06-29	2016-07-31	2016-08-30	2016-10-03	2016-10-31	14.4	13.9	14.4				15	14.5	90	90	90	91	94	93	90	90
71006	7	1	30	2	2016-03-28	2016-04-30	2016-05-29	2016-06-29	2016-07-31	2016-08-30	2016-10-03	2016-10-31	14.1	14.4	14.7	14.3	14.7	14.7	14.6	15.1	90	90	90	90	90	90	90	90
71007	7	1	39	1	2016-03-28	2016-04-30	2016-05-29	2016-06-29	2016-07-31	2016-08-30	2016-10-03	2016-10-31	14.3	13.8	14.1	13.5	13.6	13.7	14.8	13.9	90	90	90	90	90	90	90	90
71008	7	1	14	1	2016-03-28	2016-04-30	2016-05-29	2016-06-29	2016-07-31	2016-08-30	2016-10-03	2016-10-31	13.3	13.4	13.4	12.2	12.8	13.7			90	90	90	90	90	90	96	92
71009	7	1	25	2	2016-03-28	2016-04-30	2016-05-29	2016-06-29	2016-07-31	2016-08-30	2016-10-03	2016-10-31	12.6	12.9	12.6	13.2	13.2	13.1			90	90	90	90	90	90	96	92
71010	7	1	46	2	2016-03-28	2016-04-30	2016-05-29	2016-06-29	2016-07-31	2016-08-30	2016-10-03	2016-10-31	14.8	14.2	14.1		13.7	14.6	14.8		90	90	90	91	90	90	90	92
71011	7	1	30	2	2016-03-28	2016-04-30	2016-05-29	2016-06-29	2016-07-31	2016-08-30	2016-10-03	2016-10-31	13.6	12.8	11.3	10.8		11.6	14.1	13.4	90	90	90	90	94	90	90	90
71012	7	1	38	2	2016-03-28	2016-04-30	2016-05-29	2016-06-29	2016-07-31	2016-08-30	2016-10-03	2016-10-31	13.4	13.6	12.4	11.8	12.6	12.6	13.7	14.4	90	90	90	90	90	90	90	90
71013	7	1	9	1	2016-03-28	2016-04-30	2016-05-29	2016-06-29	2016-07-31	2016-08-30	2016-10-03	2016-10-31	15.1	15.6	15.8	16.1	16.2	15.5	15.7	16.4	90	90	90	90	90	90	90	90
71014	7	1	26	1	2016-03-28	2016-04-30	2016-05-29	2016-06-29	2016-07-31	2016-08-30	2016-10-03	2016-10-31	16.2	16.3	16.9	16.4	15.9	16.4	16.5	16.2	90	90	90	90	90	90	90	90
71015	7	1	55	1	2016-03-28	2016-04-30	2016-05-29	2016-06-29	2016-07-31	2016-08-30	2016-10-03	2016-10-31	15.6	15.4	15.7	15.4	15.4		15.4	15.3	90	90	90	90	90	93	90	90
71016	7	1	25	2	2016-03-28	2016-04-30	2016-05-29	2016-06-29	2016-07-31	2016-08-30	2016-10-03	2016-10-31	13.3	12.9	13.4	13.7	13.4	15.6	14.7	13.6	90	90	90	90	90	90	90	90
71017	7	1	47	2	2016-03-28	2016-04-30	2016-05-29	2016-06-29	2016-07-31	2016-08-30	2016-10-03	2016-10-31	15.2	15.6	15.7	14.4	14.9	13.7	14.9	15.6	90	90	90	90	90	90	90	90
71018	7	1	13	1	2016-03-28	2016-04-30	2016-05-29	2016-06-29	2016-07-31	2016-08-30	2016-10-03	2016-10-31	15.4	17	16.4	16.1	15.4	15.7	16.3	16.2	90	90	90	90	90	90	90	90
71019	7	1	45	1	2016-03-28	2016-04-30	2016-05-29	2016-06-29	2016-07-31	2016-08-30	2016-10-03	2016-10-31	15.2	15.7	16.4	16	15.2	15.4	15.6	16	90	90	90	90	90	90	90	90
71020	7	1	40	1	2016-03-28	2016-04-30	2016-05-29	2016-06-29	2016-07-31	2016-08-30	2016-10-03	2016-10-31	15.1	14.8	15.1	15.1	15.7	15.7	15.6	15.7	90	90	90	90	90	90	90	90
111021	11	0	39	2	2016-03-29	2016-05-02	2016-05-30	2016-07-02	2016-08-01	2016-08-31	2016-10-04	2016-11-01	13.9	14.6	14	14.1	14.7	14.6	14.7	14.7	90	90	90	90	90	90	90	90
111022	11	0	41	1	2016-03-29	2016-05-02	2016-05-30	2016-07-02	2016-08-01	2016-08-31	2016-10-04	2016-11-01	14.6	15.5	13.8	14	15	14.9	15.1	15.2	90	90	90	90	90	90	90	90
111023	11	0	13	1	2016-03-29	2016-05-02	2016-05-30	2016-07-02	2016-08-01	2016-08-31	2016-10-04	2016-11-01	12.2	13.6	14.2	14.1	12.9	13.6	13.5	13.2	90	90	90	90	90	90	90	90
111024	11	0	14	1	2016-03-29	2016-05-02	2016-05-30	2016-07-02	2016-08-01	2016-08-31	2016-10-04	2016-11-01	15	14.3	12.5	12	12.7	13.5	14	14.5	90	90	90	90	90	90	90	90
111025	11	0	12	1	2016-03-29	2016-05-02	2016-05-30	2016-07-02	2016-08-01	2016-08-31	2016-10-04	2016-11-01	14	14.5	13.8	13.9	13.1	13.2	14.7	14.6	90	90	90	90	90	90	90	90
111026	11	0	30	1	2016-03-29	2016-05-02	2016-05-30	2016-07-02	2016-08-01	2016-08-31	2016-10-04	2016-11-01	15.6	15.8	15.4	15.3	15	15.4	16.3	16	90	90	90	90	90	90	90	90
111027	11	0	54	1	2016-03-29	2016-05-02	2016-05-30	2016-07-02	2016-08-01	2016-08-31	2016-10-04	2016-11-01	16.5								90	92	92	92	92	92	92	92
111028	11	0	51	2	2016-03-29	2016-05-02	2016-05-30	2016-07-02	2016-08-01	2016-08-31	2016-10-04	2016-11-01	16.1	15.6	16.2	16.5	15.6	16.5	17	17.5	90	90	90	90	90	90	90	90
111029	11	0	29	2	2016-03-29	2016-05-02	2016-05-30	2016-07-02	2016-08-01	2016-08-31	2016-10-04	2016-11-01	11.5	12	10.6	10.7	10.8	11.3	12.4	12.8	90	90	90	90	90	90	90	90
111030	11	0	13	1	2016-03-29	2016-05-02	2016-05-30	2016-07-02	2016-08-01	2016-08-31	2016-10-04	2016-11-01	12.3	12.4	11.3	12.3	13.1	13.5	13	12.6	90	90	90	90	90	90	90	90
111031	11	0	24	1	2016-03-29	2016-05-02	2016-05-30	2016-07-02	2016-08-01	2016-08-31	2016-10-04	2016-11-01	14.5	14.3	14.1	14	14.6	15.1	15.5		90	90	90	90	90	90	90	93
111032	11	0	21	1	2016-03-29	2016-05-02	2016-05-30	2016-07-02	2016-08-01	2016-08-31	2016-10-04	2016-11-01	13.1	14.4	13.4	13.8	14.5	14.1	14.3	13.4	90	90	90	90	90	90	90	90
111033	11	0	38	2	2016-03-29	2016-05-02	2016-05-30	2016-07-02	2016-08-01	2016-08-31	2016-10-04	2016-11-01	15.8	16	15.6	15.5	16	14.7	15	15.4	90	90	90	90	90	90	90	90
111034	11	0	34	1	2016-03-29	2016-05-02	2016-05-30	2016-07-02	2016-08-01	2016-08-31	2016-10-04	2016-11-01	15	15.5	15.7	15.2	15.6	16.4	16.1	16.2	90	90	90	90	90	90	90	90
111035	11	0	10	1	2016-03-29	2016-05-02	2016-05-30	2016-07-02	2016-08-01	2016-08-31	2016-10-04	2016-11-01	15	15.2	14	13.9	12.4	13.2	14.2	14.3	90	90	90	90	90	90	90	90
111036	11	0	6	2	2016-03-29	2016-05-02	2016-05-30	2016-07-02	2016-08-01	2016-08-31	2016-10-04	2016-11-01	11.1	11.7				12.4	12.1	12.5	90	90	92	92	92	90	90	90
111037	11	0	27	2	2016-03-29	2016-05-02	2016-05-30	2016-07-02	2016-08-01	2016-08-31	2016-10-04	2016-11-01	11.9	12				15.1	15	15.5	90	90	92	92	92	90	90	90
111038	11	0	42	2	2016-03-29	2016-05-02	2016-05-30	2016-07-02	2016-08-01	2016-08-31	2016-10-04	2016-11-01	13	13.8				14.8	15.2	15.1	90	90	92	92	92	90	90	90
111039	11	0	22	1	2016-03-29	2016-05-02	2016-05-30	2016-07-02	2016-08-01	2016-08-31	2016-10-04	2016-11-01	15	15.3	15.1	15	15.7	16.2	16.1	16.2	90	90	90	90	90	90	90	90
111040	11	0	35	2	2016-03-29	2016-05-02	2016-05-30	2016-07-02	2016-08-01	2016-08-31	2016-10-04	2016-11-01	15.2	15.4	15.5	15.4	14.6	15.4	15.5	15.4	90	90	90	90	90	90	90	90
81041	8	0	39	2	2016-03-29	2016-05-02	2016-05-30	2016-07-02	2016-08-01	2016-08-31	2016-10-04	2016-11-01	14.4	13.8		14.3					90	90	91	90	91	91	92	92
81042	8	0	17	1	2016-03-29	2016-05-02	2016-05-30	2016-07-02	2016-08-01	2016-08-31	2016-10-04	2016-11-01	14.5	13.8	13.6	13.5	13.4	14.3	13.7		90	90	90	90	90	90	90	93
81043	8	0	39	2	2016-03-29	2016-05-02	2016-05-30	2016-07-02	2016-08-01	2016-08-31	2016-10-04	2016-11-01	16.5	16.6		15.3	15.6	15.5	16.2	16.1	90	90	93	90	90	90	90	90
81044	8	0	35	1	2016-03-29	2016-05-02	2016-05-30	2016-07-02	2016-08-01	2016-08-31	2016-10-04	2016-11-01	15.2	15	15.2	14.8	15	15.1	15.3	14.6	90	90	90	90	90	90	90	90
81045	8	0	8	1	2016-03-29	2016-05-02	2016-05-30	2016-07-02	2016-08-01	2016-08-31	2016-10-04	2016-11-01	13.5	13.8	13.5	13					90	90	90	90	91	93	92	92
81046	8	0	37	1	2016-03-29	2016-05-02	2016-05-30	2016-07-02	2016-08-01	2016-08-31	2016-10-04	2016-11-01	14.8	14.9	14.6	14.1					90	90	90	90	91	93	92	92
81047	8	0	12	1	2016-03-29	2016-05-02	2016-05-30	2016-07-02	2016-08-01	2016-08-31	2016-10-04	2016-11-01	12	13.4	11.7	10.4	10.2	10.5	10.8	11	90	90	90	90	90	90	90	90
81048	8	0	51	2	2016-03-29	2016-05-02	2016-05-30	2016-07-02	2016-08-01	2016-08-31	2016-10-04	2016-11-01	14.8	15.4	14.2	15	14.9	14.8	15.1	14.9	90	90	90	90	90	90	90	90
81049	8	0	36	1	2016-03-29	2016-05-02	2016-05-30	2016-07-02	2016-08-01	2016-08-31	2016-10-04	2016-11-01	14.9	14.3	15.3	14.5	14.8	14.7	15		90	90	90	90	90	90	90	92
81050	8	0	48	2	2016-03-29	2016-05-02	2016-05-30	2016-07-02	2016-08-01	2016-08-31	2016-10-04	2016-11-01	14	13.8	13.4	12.8	12.9	13.1	14		90	90	90	90	90	90	90	92
81051	8	0	36	1	2016-03-29	2016-05-02	2016-05-30	2016-07-02	2016-08-01	2016-08-31	2016-10-04	2016-11-01	15	15.3	14.8	14.6	14.7	15	15.2	14.5	90	90	90	90	90	90	90	90
81052	8	0	37	1	2016-03-29	2016-05-02	2016-05-30	2016-07-02	2016-08-01	2016-08-31	2016-10-04	2016-11-01	17	16.5	16.9	16.5	16.9				90	90	90	90	90	92	92	92
81053	8	0	18	2	2016-03-29	2016-05-02	2016-05-30	2016-07-02	2016-08-01	2016-08-31	2016-10-04	2016-11-01	12.5	12.4	12.5	12.3	12.5				90	90	90	90	90	92	92	92
81054	8	0	30	2	2016-03-29	2016-05-02	2016-05-30	2016-07-02	2016-08-01	2016-08-31	2016-10-04	2016-11-01	15.4	14.8	14.9			14	14.3		90	90	90	92	92	90	90	92
81055	8	0	7	1	2016-03-29	2016-05-02	2016-05-30	2016-07-02	2016-08-01	2016-08-31	2016-10-04	2016-11-01	14	13.8	13.7			12.3	11.6		90	90	90	92	92	90	90	92
81056	8	0	23	1	2016-03-29	2016-05-02	2016-05-30	2016-07-02	2016-08-01	2016-08-31	2016-10-04	2016-11-01	14.5	13.6	12.4	12.3		11.9			90	90	90	90	91	90	93	92
81057	8	0	34	2	2016-03-29	2016-05-02	2016-05-30	2016-07-02	2016-08-01	2016-08-31	2016-10-04	2016-11-01	13	13.4	13.1	13.2	14	14.3	13.8		90	90	90	90	90	90	90	92
81058	8	0	48	1	2016-03-29	2016-05-02	2016-05-30	2016-07-02	2016-08-01	2016-08-31	2016-10-04	2016-11-01	14.3	14	13.6	13.5	13.6	13.9			90	90	90	90	90	90	93	92
81059	8	0	34	2	2016-03-29	2016-05-02	2016-05-30	2016-07-02	2016-08-01	2016-08-31	2016-10-04	2016-11-01	14.8	16	16.1	15.4	15.5	15.6	16.3	16.4	90	90	90	90	90	90	90	90
81060	8	0	16	2	2016-03-29	2016-05-02	2016-05-30	2016-07-02	2016-08-01	2016-08-31	2016-10-04	2016-11-01	14.2	14	14.2	13.7	14	14.4	14.8	15.1	90	90	90	90	90	90	90	90
171061	17	0	6	1	2016-03-29	2016-05-02	2016-05-30	2016-07-02	2016-08-01	2016-08-31	2016-10-04	2016-11-01	13.4	13.6	13.1	13	12.9	13.1	12.5	12.6	90	90	90	90	90	90	90	90
171062	17	0	29	1	2016-03-29	2016-05-02	2016-05-30	2016-07-02	2016-08-01	2016-08-31	2016-10-04	2016-11-01	14.3	14.7	14.3	14.9	14.5	14.4	14.6	13.7	90	90	90	90	90	90	90	90
171063	17	0	31	1	2016-03-29	2016-05-02	2016-05-30	2016-07-02	2016-08-01	2016-08-31	2016-10-04	2016-11-01	14.5	14.5	14.1		14.2	14.5	15.2		90	90	90	91	90	90	90	92
171064	17	0	21	1	2016-03-29	2016-05-02	2016-05-30	2016-07-02	2016-08-01	2016-08-31	2016-10-04	2016-11-01	15.5	16.4	15.8	15.3	15.4	15.3			90	90	90	90	90	90	93	93
171065	17	0	22	2	2016-03-29	2016-05-02	2016-05-30	2016-07-02	2016-08-01	2016-08-31	2016-10-04	2016-11-01	14.8	15.1	15	14.7	14.8	15	15.6		90	90	90	90	90	90	90	93
171066	17	0	35	2	2016-03-29	2016-05-02	2016-05-30	2016-07-02	2016-08-01	2016-08-31	2016-10-04	2016-11-01	15.1	15.3	15.6	15.2	15	15.3	14.7		90	90	90	90	90	90	90	92
171067	17	0	53	2	2016-03-29	2016-05-02	2016-05-30	2016-07-02	2016-08-01	2016-08-31	2016-10-04	2016-11-01	16	15.9	16.4	16.5	16.4	16.6			90	90	90	90	90	90	91	92
171068	17	0	54	1	2016-03-29	2016-05-02	2016-05-30	2016-07-02	2016-08-01	2016-08-31	2016-10-04	2016-11-01	15.7	15.6	15.8	15.6	15.5	15.1	15		90	90	90	90	90	90	90	92
171069	17	0	37	2	2016-03-29	2016-05-02	2016-05-30	2016-07-02	2016-08-01	2016-08-31	2016-10-04	2016-11-01	12.8	13.5	14.5	14.7	14.5	12.9	12.8		90	90	90	90	90	90	90	92
171070	17	0	23	1	2016-03-29	2016-05-02	2016-05-30	2016-07-02	2016-08-01	2016-08-31	2016-10-04	2016-11-01	14.5	14.4	14.7	15	14.8	15	14.6		90	90	90	90	90	90	90	92
171071	17	0	34	1	2016-03-29	2016-05-02	2016-05-30	2016-07-02	2016-08-01	2016-08-31	2016-10-04	2016-11-01	14	14	13.8	13.6	13.8	14.5	14.7		90	90	90	90	90	90	90	92
171072	17	0	20	1	2016-03-29	2016-05-02	2016-05-30	2016-07-02	2016-08-01	2016-08-31	2016-10-04	2016-11-01	13.4	13.3	13.1	12.9	13.4	14.4	13.5		90	90	90	90	90	90	90	92
171073	17	0	30	2	2016-03-29	2016-05-02	2016-05-30	2016-07-02	2016-08-01	2016-08-31	2016-10-04	2016-11-01	14.3	14.3	14.2	14.5	14.4	14.5	14.7		90	90	90	90	90	90	90	92
171074	17	0	51	1	2016-03-29	2016-05-02	2016-05-30	2016-07-02	2016-08-01	2016-08-31	2016-10-04	2016-11-01	13.4	13.5	13.9	13.7	13.9	14.4	14	14.9	90	90	90	90	90	90	90	90
171075	17	0	27	1	2016-03-29	2016-05-02	2016-05-30	2016-07-02	2016-08-01	2016-08-31	2016-10-04	2016-11-01	13.9	13.2	13.3	13.5	13.5	13.7	14		90	90	90	90	90	90	90	92
171076	17	0	6	2	2016-03-29	2016-05-02	2016-05-30	2016-07-02	2016-08-01	2016-08-31	2016-10-04	2016-11-01	13.2	13.3	14	14.1	14	13.6	13.5		90	90	90	90	90	90	90	92
171077	17	0	27	2	2016-03-29	2016-05-02	2016-05-30	2016-07-02	2016-08-01	2016-08-31	2016-10-04	2016-11-01	13.6	14	14.1	14		15.3	14.7	14.1	90	90	90	90	92	90	90	90
171078	17	0	47	2	2016-03-29	2016-05-02	2016-05-30	2016-07-02	2016-08-01	2016-08-31	2016-10-04	2016-11-01	14	14.9	14.6	14.7		15	15.1	15.2	90	90	90	90	92	90	90	90
171079	17	0	18	2	2016-03-29	2016-05-02	2016-05-30	2016-07-02	2016-08-01	2016-08-31	2016-10-04	2016-11-01	13	13.5	13.7	13.5	13.4	13.7	12.9	13.2	90	90	90	90	90	90	90	90
171080	17	0	35	1	2016-03-29	2016-05-02	2016-05-30	2016-07-02	2016-08-01	2016-08-31	2016-10-04	2016-11-01	15.3	15.2	14.9	14.8	14.9	14.9	14.8	15.1	90	90	90	90	90	90	90	90
21081	2	1	9	2	2016-03-29	2016-05-02	2016-05-30	2016-07-02	2016-08-01	2016-08-31	2016-10-04	2016-11-01	11.5	12							90	90	92	92	92	92	92	92
21082	2	1	20	1	2016-03-29	2016-05-02	2016-05-30	2016-07-02	2016-08-01	2016-08-31	2016-10-04	2016-11-01	11.9	12.1							90	90	92	92	92	92	92	92
21083	2	1	11	1	2016-03-29	2016-05-02	2016-05-30	2016-07-02	2016-08-01	2016-08-31	2016-10-04	2016-11-01	12.5	12.6	13.8						90	90	90	94	94	93	92	92
11084	1	1	9	1	2016-03-29	2016-05-02	2016-05-30	2016-07-02	2016-08-01	2016-08-31	2016-10-04	2016-11-01	12.6	13.6	13.4	11.1	12.4	12.5	11.9		90	90	90	90	90	90	90	93
11085	1	1	38	1	2016-03-29	2016-05-02	2016-05-30	2016-07-02	2016-08-01	2016-08-31	2016-10-04	2016-11-01	14.5	14.1	14.4		15	14.7		14.6	90	90	90	93	90	90	93	90
11086	1	1	28	2	2016-03-29	2016-05-02	2016-05-30	2016-07-02	2016-08-01	2016-08-31	2016-10-04	2016-11-01	12.9	12.7	12.5		13.1	12.7	12.5	12.5	90	90	90	91	90	90	90	90
11087	1	1	7	1	2016-03-29	2016-05-02	2016-05-30	2016-07-02	2016-08-01	2016-08-31	2016-10-04	2016-11-01	12	11.9	12		13	12.4	13	12.4	90	90	90	91	90	90	90	90
11088	1	1	29	2	2016-03-29	2016-05-02	2016-05-30	2016-07-02	2016-08-01	2016-08-31	2016-10-04	2016-11-01	13.9	14.8			15		14.9		90	90	93	91	90	93	90	93
11089	1	1	14	2	2016-03-29	2016-05-02	2016-05-30	2016-07-02	2016-08-01	2016-08-31	2016-10-04	2016-11-01	13.5	13.7	14.2	13.6	14.8	14.7	14.3	14.3	90	90	90	90	90	90	90	90
11090	1	1	20	1	2016-03-29	2016-05-02	2016-05-30	2016-07-02	2016-08-01	2016-08-31	2016-10-04	2016-11-01	11.5	12.1	12.4	12.5	12.6	12.5	12.5	13	90	90	90	90	90	90	90	90
11091	1	1	23	2	2016-03-29	2016-05-02	2016-05-30	2016-07-02	2016-08-01	2016-08-31	2016-10-04	2016-11-01	12.6	12.4	13.8			13	12.7	12.8	90	90	90	94	93	90	90	90
11092	1	1	38	2	2016-03-29	2016-05-02	2016-05-30	2016-07-02	2016-08-01	2016-08-31	2016-10-04	2016-11-01	15.1	15.2	15.5		14.8	15.1	15.2	15	90	90	90	91	90	90	90	90
11093	1	1	50	2	2016-03-29	2016-05-02	2016-05-30	2016-07-02	2016-08-01	2016-08-31	2016-10-04	2016-11-01	16.4	16	15.6		16.6	16.7	16.7	16.7	90	90	90	91	90	90	90	90
11094	1	1	15	1	2016-03-29	2016-05-02	2016-05-30	2016-07-02	2016-08-01	2016-08-31	2016-10-04	2016-11-01	15.3	14.8	14.1	14.6	14.2	13.8	13.4	13.8	90	90	90	90	90	90	90	90
11095	1	1	31	2	2016-03-29	2016-05-02	2016-05-30	2016-07-02	2016-08-01	2016-08-31	2016-10-04	2016-11-01	16.7	17.5	16.4	15.9	16	15.9	16.4	15.6	90	90	90	90	90	90	90	90
11096	1	1	22	1	2016-03-29	2016-05-02	2016-05-30	2016-07-02	2016-08-01	2016-08-31	2016-10-04	2016-11-01	13.5	13.4	12	12.7	13.2	13	12.9	13.1	90	90	90	90	90	90	90	90
11097	1	1	44	1	2016-03-29	2016-05-02	2016-05-30	2016-07-02	2016-08-01	2016-08-31	2016-10-04	2016-11-01	14.8	14.2	13.9						90	90	90	93	93	92	92	92
11098	1	1	22	1	2016-03-29	2016-05-02	2016-05-30	2016-07-02	2016-08-01	2016-08-31	2016-10-04	2016-11-01	15	14.9	14.4						90	90	90	93	93	92	92	92
11099	1	1	47	2	2016-03-29	2016-05-02	2016-05-30	2016-07-02	2016-08-01	2016-08-31	2016-10-04	2016-11-01	14.4	14.2	13.9		13	14.1	14.1	13.5	90	90	90	91	90	90	90	90
11100	1	1	33	2	2016-03-29	2016-05-02	2016-05-30	2016-07-02	2016-08-01	2016-08-31	2016-10-04	2016-11-01	14.6	14.3	14.3	15.1	14.9	15	14.7	15	90	90	90	90	90	90	90	90
31101	3	1	44	2	2016-03-29	2016-05-02	2016-05-30	2016-07-02	2016-08-01	2016-08-31	2016-10-04	2016-11-01	12.5	12.8	13.5	13	13.2	13	14.1	14.6	90	90	90	90	90	90	90	90
31102	3	1	27	2	2016-03-29	2016-05-02	2016-05-30	2016-07-02	2016-08-01	2016-08-31	2016-10-04	2016-11-01	11.5	12	12.3	12	12.1	12.5	13	13.7	90	90	90	90	90	90	90	90
31103	3	1	8	2	2016-03-29	2016-05-02	2016-05-30	2016-07-02	2016-08-01	2016-08-31	2016-10-04	2016-11-01	9.6	10.3	10.7	15.5	10.4	10.5	11	11.7	90	90	90	90	90	90	90	90
31104	3	1	50	1	2016-03-29	2016-05-02	2016-05-30	2016-07-02	2016-08-01	2016-08-31	2016-10-04	2016-11-01	14.1	14.2		15.5	15.1	15.9	16.1	16.2	90	90	92	90	90	90	90	90
31105	3	1	9	2	2016-03-29	2016-05-02	2016-05-30	2016-07-02	2016-08-01	2016-08-31	2016-10-04	2016-11-01	11.9								90	91	92	92	92	92	92	92
31106	3	1	41	2	2016-03-29	2016-05-02	2016-05-30	2016-07-02	2016-08-01	2016-08-31	2016-10-04	2016-11-01	13.5	14.7	13	13.4	14	14.5	14.6	15.1	90	90	90	90	90	90	90	90
31107	3	1	26	1	2016-03-29	2016-05-02	2016-05-30	2016-07-02	2016-08-01	2016-08-31	2016-10-04	2016-11-01	14.9	14.2	14.1	14.7	14.3	14.5	15.3	15.5	90	90	90	90	90	90	90	90
31108	3	1	25	2	2016-03-29	2016-05-02	2016-05-30	2016-07-02	2016-08-01	2016-08-31	2016-10-04	2016-11-01	13.5	14.3	14	14.7	14.5	14	14.5	14.4	90	90	90	90	90	90	90	90
31109	3	1	34	1	2016-03-29	2016-05-02	2016-05-30	2016-07-02	2016-08-01	2016-08-31	2016-10-04	2016-11-01	14.1	13.5	13.5		13.4	13.8	14.5	14.7	90	90	90	91	90	90	90	90
31110	3	1	20	2	2016-03-29	2016-05-02	2016-05-30	2016-07-02	2016-08-01	2016-08-31	2016-10-04	2016-11-01	12.2	11.9	12		12.4	12.5	13.2	14	90	90	90	91	90	90	90	90
31111	3	1	50	2	2016-03-29	2016-05-02	2016-05-30	2016-07-02	2016-08-01	2016-08-31	2016-10-04	2016-11-01	15.1	15.8	15.4	16	15.8	14.5	15.4		90	90	90	90	90	90	90	92
31112	3	1	23	1	2016-03-29	2016-05-02	2016-05-30	2016-07-02	2016-08-01	2016-08-31	2016-10-04	2016-11-01	13.8	14.2							90	90	92	92	92	92	92	92
31113	3	1	24	2	2016-03-29	2016-05-02	2016-05-30	2016-07-02	2016-08-01	2016-08-31	2016-10-04	2016-11-01	14.1	14.9	14.3	14	14.1	14	14.1	14.1	90	90	90	90	90	90	90	90
31114	3	1	54	2	2016-03-29	2016-05-02	2016-05-30	2016-07-02	2016-08-01	2016-08-31	2016-10-04	2016-11-01	15.1	14	15	15.5	15.1	15	15.5	15	90	90	90	90	90	90	90	90
31115	3	1	10	1	2016-03-29	2016-05-02	2016-05-30	2016-07-02	2016-08-01	2016-08-31	2016-10-04	2016-11-01	12.4	12	11.5	11.6	11.9	12.9	12.4	12.7	90	90	90	90	90	90	90	90
31116	3	1	48	1	2016-03-29	2016-05-02	2016-05-30	2016-07-02	2016-08-01	2016-08-31	2016-10-04	2016-11-01	14.1	15	14.8	14.5	14.9	14.7	15	15.3	90	90	90	90	90	90	90	90
31117	3	1	48	2	2016-03-29	2016-05-02	2016-05-30	2016-07-02	2016-08-01	2016-08-31	2016-10-04	2016-11-01	13.5	13.8	13.5	13.9	14.3	13.9	14.3	14.8	90	90	90	90	90	90	90	90
31118	3	1	30	1	2016-03-29	2016-05-02	2016-05-30	2016-07-02	2016-08-01	2016-08-31	2016-10-04	2016-11-01	12.1	12.3	12.5	12.6	13.1	12.5	13.2	14.5	90	90	90	90	90	90	90	90
31119	3	1	36	1	2016-03-29	2016-05-02	2016-05-30	2016-07-02	2016-08-01	2016-08-31	2016-10-04	2016-11-01	13.6	14.5	15.2	15.8	15.9	15.8	16	16.9	90	90	90	90	90	90	90	90
31120	3	1	59	1	2016-03-29	2016-05-02	2016-05-30	2016-07-02	2016-08-01	2016-08-31	2016-10-04	2016-11-01	15.1	14.1	14.6	15.1	15.4				90	90	90	90	90	93	93	93
71121	7	1	11	1	2016-03-29	2016-05-02	2016-05-30	2016-07-02	2016-08-01	2016-08-31	2016-10-04	2016-11-01	9.8	9.1			10.7	11.2	12.5	13.1	90	90	94	91	90	90	90	90
71122	7	1	26	1	2016-03-29	2016-05-02	2016-05-30	2016-07-02	2016-08-01	2016-08-31	2016-10-04	2016-11-01	14.2	14.7		15		14.4	14.6	14.8	90	90	94	90	91	90	90	90
71123	7	1	37	2	2016-03-29	2016-05-02	2016-05-30	2016-07-02	2016-08-01	2016-08-31	2016-10-04	2016-11-01	14.7	14.4	15.2	14.8	14.9	15	15.4	14.4	90	90	90	90	90	90	90	90
71124	7	1	8	1	2016-03-29	2016-05-02	2016-05-30	2016-07-02	2016-08-01	2016-08-31	2016-10-04	2016-11-01	14.2	13.9	12.4	12.7					90	90	90	90	91	93	93	93
71125	7	1	25	2	2016-03-29	2016-05-02	2016-05-30	2016-07-02	2016-08-01	2016-08-31	2016-10-04	2016-11-01	13.9	13.6	13.7	12.7		14.4	13.4	14.6	90	90	90	90	91	90	90	90
71126	7	1	45	1	2016-03-29	2016-05-02	2016-05-30	2016-07-02	2016-08-01	2016-08-31	2016-10-04	2016-11-01	15.8	16.2	15.7	15.9	15.7	15.9	15.7	16	90	90	90	90	90	90	90	90
71127	7	1	33	1	2016-03-29	2016-05-02	2016-05-30	2016-07-02	2016-08-01	2016-08-31	2016-10-04	2016-11-01	14.9	15.4	13.3	14.9	15.7	15.2	15.4	15.2	90	90	90	90	90	90	90	90
71128	7	1	34	1	2016-03-29	2016-05-02	2016-05-30	2016-07-02	2016-08-01	2016-08-31	2016-10-04	2016-11-01	15.8	15.7	16.1	15.8	16.4	16.5	17.1	16.7	90	90	90	90	90	90	90	90
71129	7	1	50	2	2016-03-29	2016-05-02	2016-05-30	2016-07-02	2016-08-01	2016-08-31	2016-10-04	2016-11-01	15.2	15.1	15.1	15.9	15.4	15.4	15.9	15.9	90	90	90	90	90	90	90	90
71130	7	1	35	2	2016-03-29	2016-05-02	2016-05-30	2016-07-02	2016-08-01	2016-08-31	2016-10-04	2016-11-01	14.1	14.2	14.1	14.1	13.8	14.4			90	90	90	90	90	90	93	93
71131	7	1	47	2	2016-03-29	2016-05-02	2016-05-30	2016-07-02	2016-08-01	2016-08-31	2016-10-04	2016-11-01	16.3	15.6	15.7	16.4	15.7	15.8			90	90	90	90	90	90	93	93
71132	7	1	43	1	2016-03-29	2016-05-02	2016-05-30	2016-07-02	2016-08-01	2016-08-31	2016-10-04	2016-11-01	16.1	15.7	15.4	16.2	16.3	16.2	15.6	15.4	90	90	90	90	90	90	90	90
71133	7	1	27	2	2016-03-29	2016-05-02	2016-05-30	2016-07-02	2016-08-01	2016-08-31	2016-10-04	2016-11-01	13.7	13.6	14.2	13.8	14.2	13.6	13.7	13.6	90	90	90	90	90	90	90	90
71134	7	1	43	2	2016-03-29	2016-05-02	2016-05-30	2016-07-02	2016-08-01	2016-08-31	2016-10-04	2016-11-01	14.8	15.1	14.5	14.4	14.6	14.8	14.7	14.9	90	90	90	90	90	90	90	90
71135	7	1	22	1	2016-03-29	2016-05-02	2016-05-30	2016-07-02	2016-08-01	2016-08-31	2016-10-04	2016-11-01	13.3	13.2	13.9	13.7	13.8	14.6	14.5	15	90	90	90	90	90	90	90	90
71136	7	1	34	2	2016-03-29	2016-05-02	2016-05-30	2016-07-02	2016-08-01	2016-08-31	2016-10-04	2016-11-01	14.4	14.6	14.7	14.8					90	90	90	90	92	92	92	92
71137	7	1	14	2	2016-03-29	2016-05-02	2016-05-30	2016-07-02	2016-08-01	2016-08-31	2016-10-04	2016-11-01	11.6	12.3	12.7	12.1	12.2	12.3	12.6	12.1	90	90	90	90	90	90	90	90
71138	7	1	31	2	2016-03-29	2016-05-02	2016-05-30	2016-07-02	2016-08-01	2016-08-31	2016-10-04	2016-11-01	15.1	14.8	15.4	15.2	15.6	16.1	17.1	16.7	90	90	90	90	90	90	90	90
71139	7	1	46	2	2016-03-29	2016-05-02	2016-05-30	2016-07-02	2016-08-01	2016-08-31	2016-10-04	2016-11-01	16.1	15.7	16.1	16	15.7	15.7	16.2	15.9	90	90	90	90	90	90	90	90
71140	7	1	40	2	2016-03-29	2016-05-02	2016-05-30	2016-07-02	2016-08-01	2016-08-31	2016-10-04	2016-11-01	15.8	15.8	15.4	14.9		14.3		16.6	90	90	90	90	91	90	91	90
111141	11	0	15	2	2016-03-30	2016-05-03	2016-05-31	2016-07-02	2016-08-02	2016-09-03	2016-10-05	2016-11-02	13	13.2	13.4	13.5	13	13.5	13	13.1	90	90	90	90	90	90	90	90
111142	11	0	14	2	2016-03-30	2016-05-03	2016-05-31	2016-07-02	2016-08-02	2016-09-03	2016-10-05	2016-11-02	13.5	13.7	13.3	13.2	13.5	13.9	14.2	14	90	90	90	90	90	90	90	90
111143	11	0	44	2	2016-03-30	2016-05-03	2016-05-31	2016-07-02	2016-08-02	2016-09-03	2016-10-05	2016-11-02	14.4	15.6	15.5	15	15.2	15.5	15.2	15.2	90	90	90	90	90	90	90	90
111144	11	0	11	1	2016-03-30	2016-05-03	2016-05-31	2016-07-02	2016-08-02	2016-09-03	2016-10-05	2016-11-02	13.5	14							90	90	91	91	92	92	92	92
111145	11	0	39	1	2016-03-30	2016-05-03	2016-05-31	2016-07-02	2016-08-02	2016-09-03	2016-10-05	2016-11-02	13.4	13.8							90	90	91	91	92	92	92	92
111146	11	0	20	1	2016-03-30	2016-05-03	2016-05-31	2016-07-02	2016-08-02	2016-09-03	2016-10-05	2016-11-02	13.8	14.9							90	90	91	91	92	92	92	92
111147	11	0	16	1	2016-03-30	2016-05-03	2016-05-31	2016-07-02	2016-08-02	2016-09-03	2016-10-05	2016-11-02	13	13.7	13.4	13.3	13.2	14.8	14	14.1	90	90	90	90	90	90	90	90
111148	11	0	38	2	2016-03-30	2016-05-03	2016-05-31	2016-07-02	2016-08-02	2016-09-03	2016-10-05	2016-11-02	15.2	15.9	15.3	15.2	14.6	15.5	15.5	16	90	90	90	90	90	90	90	90
111149	11	0	27	1	2016-03-30	2016-05-03	2016-05-31	2016-07-02	2016-08-02	2016-09-03	2016-10-05	2016-11-02	15	13.1	13.2		13.5	15	15.2	15	90	90	90	92	90	90	90	90
111150	11	0	8	1	2016-03-30	2016-05-03	2016-05-31	2016-07-02	2016-08-02	2016-09-03	2016-10-05	2016-11-02	14	14.3	13.4		14	13.5	14.5	15.1	90	90	90	92	90	90	90	90
111151	11	0	26	2	2016-03-30	2016-05-03	2016-05-31	2016-07-02	2016-08-02	2016-09-03	2016-10-05	2016-11-02	13.5	13.3	12.4	12.5	12.1	12.3	12.8	13	90	90	90	90	90	90	90	90
111152	11	0	48	2	2016-03-30	2016-05-03	2016-05-31	2016-07-02	2016-08-02	2016-09-03	2016-10-05	2016-11-02	14.6	15.4	14.9	14.5	15	15.4	15.5	14.9	90	90	90	90	90	90	90	90
111153	11	0	39	2	2016-03-30	2016-05-03	2016-05-31	2016-07-02	2016-08-02	2016-09-03	2016-10-05	2016-11-02	14	13.8	13.5	13	14.4	14.5	14.3		90	90	90	90	90	90	90	93
111154	11	0	30	1	2016-03-30	2016-05-03	2016-05-31	2016-07-02	2016-08-02	2016-09-03	2016-10-05	2016-11-02	14.8	14.6	14.4	14.5	14.5	14.8	15.2		90	90	90	90	90	90	90	93
111155	11	0	8	2	2016-03-30	2016-05-03	2016-05-31	2016-07-02	2016-08-02	2016-09-03	2016-10-05	2016-11-02	9	10.1	11.4	14.3	11.8	11.5	11.9	12.2	90	90	90	90	90	90	90	90
111156	11	0	21	1	2016-03-30	2016-05-03	2016-05-31	2016-07-02	2016-08-02	2016-09-03	2016-10-05	2016-11-02	12.6	13	13.6	13.7	14	14.2	14	14.2	90	90	90	90	90	90	90	90
111157	11	0	31	1	2016-03-30	2016-05-03	2016-05-31	2016-07-02	2016-08-02	2016-09-03	2016-10-05	2016-11-02	13.2	13.5	12.9	13.3	13.4	13.1	13.4	14.1	90	90	90	90	90	90	90	90
111158	11	0	10	2	2016-03-30	2016-05-03	2016-05-31	2016-07-02	2016-08-02	2016-09-03	2016-10-05	2016-11-02	10.9	11.7	11.3	12	12.1	12.2	12.3	12.3	90	90	90	90	90	90	90	90
111159	11	0	34	2	2016-03-30	2016-05-03	2016-05-31	2016-07-02	2016-08-02	2016-09-03	2016-10-05	2016-11-02	16	17.4	15.7		16.1	16.6	16.3	16.4	90	90	90	92	90	90	90	90
111160	11	0	57	1	2016-03-30	2016-05-03	2016-05-31	2016-07-02	2016-08-02	2016-09-03	2016-10-05	2016-11-02	15	15.7	15.4		15.5	14.8	14.7		90	90	90	92	90	90	90	93
81161	8	0	9	1	2016-03-30	2016-05-03	2016-05-31	2016-07-02	2016-08-02	2016-09-03	2016-10-05	2016-11-02	12	12.2	11.3	12.6	12.7	12.8			90	90	90	90	90	90	92	92
81162	8	0	21	2	2016-03-30	2016-05-03	2016-05-31	2016-07-02	2016-08-02	2016-09-03	2016-10-05	2016-11-02	14.3	13.7	13.5	14	13.4	14.1			90	90	90	90	90	90	92	92
81163	8	0	40	2	2016-03-30	2016-05-03	2016-05-31	2016-07-02	2016-08-02	2016-09-03	2016-10-05	2016-11-02	16.3	16	14.5	15.4	15.3	15.4			90	90	90	90	90	90	92	92
81164	8	0	36	1	2016-03-30	2016-05-03	2016-05-31	2016-07-02	2016-08-02	2016-09-03	2016-10-05	2016-11-02	14.5	13.8	13.9	14.5	14.7	13.7			90	90	90	90	90	90	93	92
81165	8	0	16	2	2016-03-30	2016-05-03	2016-05-31	2016-07-02	2016-08-02	2016-09-03	2016-10-05	2016-11-02	13.7	12.8	13.3			14			90	90	90	91	91	90	93	91
81166	8	0	29	2	2016-03-30	2016-05-03	2016-05-31	2016-07-02	2016-08-02	2016-09-03	2016-10-05	2016-11-02	15.4	12.6	14.8			14.4	15	14.2	90	90	90	91	91	90	90	90
81167	8	0	48	2	2016-03-30	2016-05-03	2016-05-31	2016-07-02	2016-08-02	2016-09-03	2016-10-05	2016-11-02	15.5	16.5	15.8	15.4	15.9	16.5	16.1	17	90	90	90	90	90	90	90	90
81168	8	0	34	1	2016-03-30	2016-05-03	2016-05-31	2016-07-02	2016-08-02	2016-09-03	2016-10-05	2016-11-02	15.5	14.6	14.5	14.9	15.6	14.8	15.7		90	90	90	90	90	90	90	92
81169	8	0	23	1	2016-03-30	2016-05-03	2016-05-31	2016-07-02	2016-08-02	2016-09-03	2016-10-05	2016-11-02	13.3	12.6	11.8	12	12.5	13	13.5		90	90	90	90	90	90	90	92
81170	8	0	9	1	2016-03-30	2016-05-03	2016-05-31	2016-07-02	2016-08-02	2016-09-03	2016-10-05	2016-11-02	14.3	13.4	13	13.1	13.6	13.5	13.8		90	90	90	90	90	90	90	92
81171	8	0	34	1	2016-03-30	2016-05-03	2016-05-31	2016-07-02	2016-08-02	2016-09-03	2016-10-05	2016-11-02	13	13.1	12.8	12.6	13.5	13.6	13.5	13.7	90	90	90	90	90	90	90	90
81172	8	0	42	2	2016-03-30	2016-05-03	2016-05-31	2016-07-02	2016-08-02	2016-09-03	2016-10-05	2016-11-02	17	16.2	16.3	16.4	16.7	15.7	16.3	16.5	90	90	90	90	90	90	90	90
81173	8	0	17	2	2016-03-30	2016-05-03	2016-05-31	2016-07-02	2016-08-02	2016-09-03	2016-10-05	2016-11-02	13.3	13.5	13.3	12.8	13	12.7	13.3	13.5	90	90	90	90	90	90	90	90
81174	8	0	35	2	2016-03-30	2016-05-03	2016-05-31	2016-07-02	2016-08-02	2016-09-03	2016-10-05	2016-11-02	14.3	13.7	13.6	13.4	14.3	13.8	14.2	14.6	90	90	90	90	90	90	90	90
81175	8	0	30	2	2016-03-30	2016-05-03	2016-05-31	2016-07-02	2016-08-02	2016-09-03	2016-10-05	2016-11-02	14	13.6	14	13.8	14	13.9	14.2		90	90	90	90	90	90	90	92
81176	8	0	6	2	2016-03-30	2016-05-03	2016-05-31	2016-07-02	2016-08-02	2016-09-03	2016-10-05	2016-11-02	13.4	13				12.6	12		90	90	93	91	91	90	90	92
81177	8	0	48	2	2016-03-30	2016-05-03	2016-05-31	2016-07-02	2016-08-02	2016-09-03	2016-10-05	2016-11-02	15	14.2	13.5	13.6	14	14.6	14.5		90	90	90	90	90	90	90	92
81178	8	0	17	2	2016-03-30	2016-05-03	2016-05-31	2016-07-02	2016-08-02	2016-09-03	2016-10-05	2016-11-02	13.5	12.4	11.3	10.7		11.8	13.8		90	90	90	90	94	90	90	92
81179	8	0	24	1	2016-03-30	2016-05-03	2016-05-31	2016-07-02	2016-08-02	2016-09-03	2016-10-05	2016-11-02	14.2	14.6	15	14.9	14.6	14.2	14.8	14.1	90	90	90	90	90	90	90	90
81180	8	0	48	2	2016-03-30	2016-05-03	2016-05-31	2016-07-02	2016-08-02	2016-09-03	2016-10-05	2016-11-02	16.5	15.5	15.8	15.4	15.5	15.9	15.9	16.5	90	90	90	90	90	90	90	90
171181	17	0	16	2	2016-03-30	2016-05-03	2016-05-31	2016-07-02	2016-08-02	2016-09-03	2016-10-05	2016-11-02	13.5	13.5	13.8	13.7					90	90	90	90	92	92	92	92
171182	17	0	47	1	2016-03-30	2016-05-03	2016-05-31	2016-07-02	2016-08-02	2016-09-03	2016-10-05	2016-11-02	14.2	13.8	14	14.3					90	90	90	90	92	92	92	92
171183	17	0	37	1	2016-03-30	2016-05-03	2016-05-31	2016-07-02	2016-08-02	2016-09-03	2016-10-05	2016-11-02	14.9	14.9	14.7	15.1					90	90	90	90	91	91	91	92
171184	17	0	47	1	2016-03-30	2016-05-03	2016-05-31	2016-07-02	2016-08-02	2016-09-03	2016-10-05	2016-11-02	14.4	14.1	14.3	14.6					90	90	90	90	91	91	91	92
171185	17	0	17	2	2016-03-30	2016-05-03	2016-05-31	2016-07-02	2016-08-02	2016-09-03	2016-10-05	2016-11-02	13.4	12.3	12.4	13	13.4	14	13.5	13	90	90	90	90	90	90	90	90
171186	17	0	21	2	2016-03-30	2016-05-03	2016-05-31	2016-07-02	2016-08-02	2016-09-03	2016-10-05	2016-11-02	12.6	13.5	13.3			13	15.1	15.2	90	90	90	93	93	90	90	90
171187	17	0	18	1	2016-03-30	2016-05-03	2016-05-31	2016-07-02	2016-08-02	2016-09-03	2016-10-05	2016-11-02	13	12.3	12.2		12	12.4	13	13.9	90	90	90	93	90	90	90	90
171188	17	0	34	1	2016-03-30	2016-05-03	2016-05-31	2016-07-02	2016-08-02	2016-09-03	2016-10-05	2016-11-02	15.6	15	15.1	14.9	15	15.4	15	14.4	90	90	90	90	90	90	90	90
171189	17	0	14	2	2016-03-30	2016-05-03	2016-05-31	2016-07-02	2016-08-02	2016-09-03	2016-10-05	2016-11-02	14.8	14.9	14.6	14.8	15	14.7	14.8	14.5	90	90	90	90	90	90	90	90
171190	17	0	26	1	2016-03-30	2016-05-03	2016-05-31	2016-07-02	2016-08-02	2016-09-03	2016-10-05	2016-11-02	16.2	15.2	15.7	16.1	16.4	15.9	16.1	16.3	90	90	90	90	90	90	90	90
171191	17	0	22	2	2016-03-30	2016-05-03	2016-05-31	2016-07-02	2016-08-02	2016-09-03	2016-10-05	2016-11-02	16.6	17	16.4		16.6	16.9			90	90	90	91	90	90	92	92
171192	17	0	37	2	2016-03-30	2016-05-03	2016-05-31	2016-07-02	2016-08-02	2016-09-03	2016-10-05	2016-11-02	14.3	14.6	14.5		15.3	16			90	90	90	91	90	90	92	92
171193	17	0	53	2	2016-03-30	2016-05-03	2016-05-31	2016-07-02	2016-08-02	2016-09-03	2016-10-05	2016-11-02	17	16.9	16.7		16.6	16.7			90	90	90	91	90	90	92	92
171194	17	0	49	1	2016-03-30	2016-05-03	2016-05-31	2016-07-02	2016-08-02	2016-09-03	2016-10-05	2016-11-02	16.3	16.5	16.3						90	90	90	93	93	93	92	92
171195	17	0	22	2	2016-03-30	2016-05-03	2016-05-31	2016-07-02	2016-08-02	2016-09-03	2016-10-05	2016-11-02	14.8	14.7	14.6						90	90	90	96	96	96	92	92
171196	17	0	29	1	2016-03-30	2016-05-03	2016-05-31	2016-07-02	2016-08-02	2016-09-03	2016-10-05	2016-11-02	16.4	16.3	16.2	16.4	16.2	16.6			90	90	90	90	90	90	92	92
171197	17	0	53	1	2016-03-30	2016-05-03	2016-05-31	2016-07-02	2016-08-02	2016-09-03	2016-10-05	2016-11-02	15.2	15.1	15	15.4	14.9	14.7			90	90	90	90	90	90	92	92
171198	17	0	36	2	2016-03-30	2016-05-03	2016-05-31	2016-07-02	2016-08-02	2016-09-03	2016-10-05	2016-11-02	12	12.3	13.1	13.8	14	14.3	13.1	12.8	90	90	90	90	90	90	90	90
171199	17	0	21	2	2016-03-30	2016-05-03	2016-05-31	2016-07-02	2016-08-02	2016-09-03	2016-10-05	2016-11-02	13.9	14.4	14.2	14.5	14.6	14.5			90	90	90	90	90	90	92	92
171200	17	0	39	1	2016-03-30	2016-05-03	2016-05-31	2016-07-02	2016-08-02	2016-09-03	2016-10-05	2016-11-02	13.2	14.3	14.8	15.6	16	16.2			90	90	90	90	90	90	92	92
11201	1	1	46	1	2016-03-30	2016-05-03	2016-05-31	2016-07-02	2016-08-02	2016-09-03	2016-10-05	2016-11-02	13.5		13.4	13.5	13.8	13.4	13.2	13.1	90	94	90	90	90	90	90	90
11202	1	1	40	2	2016-03-30	2016-05-03	2016-05-31	2016-07-02	2016-08-02	2016-09-03	2016-10-05	2016-11-02	16.4	15.9	15.2	15.2	15.6	15.5		15.2	90	90	90	90	90	90	93	90
11203	1	1	34	1	2016-03-30	2016-05-03	2016-05-31	2016-07-02	2016-08-02	2016-09-03	2016-10-05	2016-11-02	16.3	16.1		14.4					90	90	94	90	94	92	92	92
11204	1	1	10	2	2016-03-30	2016-05-03	2016-05-31	2016-07-02	2016-08-02	2016-09-03	2016-10-05	2016-11-02	13.4	14.1		13.4					90	90	91	90	94	92	92	92
11205	1	1	15	1	2016-03-30	2016-05-03	2016-05-31	2016-07-02	2016-08-02	2016-09-03	2016-10-05	2016-11-02	12	12	12.4	12.4	12.9	13	12	12.1	90	90	90	90	90	90	90	90
11206	1	1	45	1	2016-03-30	2016-05-03	2016-05-31	2016-07-02	2016-08-02	2016-09-03	2016-10-05	2016-11-02	13.9	13.1	13.4	13.9	13.7	14.1	13.5	13.5	90	90	90	90	90	90	90	90
11207	1	1	13	2	2016-03-30	2016-05-03	2016-05-31	2016-07-02	2016-08-02	2016-09-03	2016-10-05	2016-11-02	13.5	12.5	12.1			13.2			90	90	90	91	94	90	93	94
11208	1	1	43	2	2016-03-30	2016-05-03	2016-05-31	2016-07-02	2016-08-02	2016-09-03	2016-10-05	2016-11-02	12.2	11.9	11.9	12.2	12.1	12.6	12.3	12	90	90	90	90	90	90	90	90
11209	1	1	32	1	2016-03-30	2016-05-03	2016-05-31	2016-07-02	2016-08-02	2016-09-03	2016-10-05	2016-11-02	13.8	13.3	13.8	13.4	13.5	13.8	14.1	14.2	90	90	90	90	90	90	90	90
11210	1	1	20	2	2016-03-30	2016-05-03	2016-05-31	2016-07-02	2016-08-02	2016-09-03	2016-10-05	2016-11-02	12.4	12	12.2	12.2	12.3	12.7	12.6	12.1	90	90	90	90	90	90	90	90
11211	1	1	18	2	2016-03-30	2016-05-03	2016-05-31	2016-07-02	2016-08-02	2016-09-03	2016-10-05	2016-11-02	14.4	13.4	13.8	13.8	13.7	14.2	13.4	13.8	90	90	90	90	90	90	90	90
11212	1	1	31	2	2016-03-30	2016-05-03	2016-05-31	2016-07-02	2016-08-02	2016-09-03	2016-10-05	2016-11-02	15.1	13.5	14	13.5	13.4	13.5	14.4	14.2	90	90	90	90	90	90	90	90
11213	1	1	56	1	2016-03-30	2016-05-03	2016-05-31	2016-07-02	2016-08-02	2016-09-03	2016-10-05	2016-11-02	14	13.4	13.6	13.9	13.2	13.7	14	13.5	90	90	90	90	90	90	90	90
11214	1	1	34	2	2016-03-30	2016-05-03	2016-05-31	2016-07-02	2016-08-02	2016-09-03	2016-10-05	2016-11-02	14.6		15.8						90	91	90	91	93	93	93	93
11215	1	1	4	2	2016-03-30	2016-05-03	2016-05-31	2016-07-02	2016-08-02	2016-09-03	2016-10-05	2016-11-02	11.5		12.5						90	91	90	91	93	93	93	93
11216	1	1	22	2	2016-03-30	2016-05-03	2016-05-31	2016-07-02	2016-08-02	2016-09-03	2016-10-05	2016-11-02	12.8	11.4	11.1	11.8	12.2	12.8	12.6	12.8	90	90	90	90	90	90	90	90
11217	1	1	47	2	2016-03-30	2016-05-03	2016-05-31	2016-07-02	2016-08-02	2016-09-03	2016-10-05	2016-11-02	13.9	13.4	12.8	12.1	12.5	13.4	14	13.1	90	90	90	90	90	90	90	90
11218	1	1	44	1	2016-03-30	2016-05-03	2016-05-31	2016-07-02	2016-08-02	2016-09-03	2016-10-05	2016-11-02	16	15.4	15.8	16.7		16.8	16.7	16.5	90	90	90	90	91	90	90	90
11219	1	1	22	2	2016-03-30	2016-05-03	2016-05-31	2016-07-02	2016-08-02	2016-09-03	2016-10-05	2016-11-02	15.2	16	15.7	15.8		15.9	15.8	15.6	90	90	90	90	91	90	90	90
11220	1	1	18	1	2016-03-30	2016-05-03	2016-05-31	2016-07-02	2016-08-02	2016-09-03	2016-10-05	2016-11-02	12.9	12.6	13.4		13.6	13.3	14.4	14.6	90	90	90	93	90	90	90	90
31221	3	1	32	2	2016-03-30	2016-05-03	2016-05-31	2016-07-02	2016-08-02	2016-09-03	2016-10-05	2016-11-02	15.9	14.8	15.8	15.3	15.4	15.2	16.5	15.4	90	90	90	90	90	90	90	90
31222	3	1	30	2	2016-03-30	2016-05-03	2016-05-31	2016-07-02	2016-08-02	2016-09-03	2016-10-05	2016-11-02	15.2	14	14.5	14.8	15.5	15.1	15.4	15.8	90	90	90	90	90	90	90	90
31223	3	1	47	1	2016-03-30	2016-05-03	2016-05-31	2016-07-02	2016-08-02	2016-09-03	2016-10-05	2016-11-02	14.2	13	13.4	14.5	14.6	14.5	15.4	14.7	90	90	90	90	90	90	90	90
31224	3	1	28	2	2016-03-30	2016-05-03	2016-05-31	2016-07-02	2016-08-02	2016-09-03	2016-10-05	2016-11-02	14.6	13.8	13.4	13.7	14.1	13.5	13.8	14.5	90	90	90	90	90	90	90	90
31225	3	1	36	1	2016-03-30	2016-05-03	2016-05-31	2016-07-02	2016-08-02	2016-09-03	2016-10-05	2016-11-02	14.1	14.2	15.5	14.8	14.9	15	15.4	15.5	90	90	90	90	90	90	90	90
31226	3	1	39	2	2016-03-30	2016-05-03	2016-05-31	2016-07-02	2016-08-02	2016-09-03	2016-10-05	2016-11-02	14.9	15	16	16.2	15.8	15.5	15.8	15.7	90	90	90	90	90	90	90	90
31227	3	1	56	2	2016-03-30	2016-05-03	2016-05-31	2016-07-02	2016-08-02	2016-09-03	2016-10-05	2016-11-02	16.5	15.9	15.4	15.3	15.4	15	15.5	15.7	90	90	90	90	90	90	90	90
31228	3	1	48	2	2016-03-30	2016-05-03	2016-05-31	2016-07-02	2016-08-02	2016-09-03	2016-10-05	2016-11-02	13.9	14	14.5	16.5	14.5	14.6	15.3	14.8	90	90	90	90	90	90	90	90
31229	3	1	24	2	2016-03-30	2016-05-03	2016-05-31	2016-07-02	2016-08-02	2016-09-03	2016-10-05	2016-11-02	14.2	14.8	15	15.5		14		16	90	90	90	90	91	90	93	90
31230	3	1	7	2	2016-03-30	2016-05-03	2016-05-31	2016-07-02	2016-08-02	2016-09-03	2016-10-05	2016-11-02	13.5	14.2	13.5	13.5		13.5		14.5	90	90	90	90	91	90	93	90
31231	3	1	41	2	2016-03-30	2016-05-03	2016-05-31	2016-07-02	2016-08-02	2016-09-03	2016-10-05	2016-11-02	12.5	13	12.9	15	14.4	14	14.2	15	90	90	90	90	90	90	90	90
31232	3	1	36	2	2016-03-30	2016-05-03	2016-05-31	2016-07-02	2016-08-02	2016-09-03	2016-10-05	2016-11-02	13.8	14	15	15.5	14.5	15			90	90	90	90	90	90	95	95
31233	3	1	38	1	2016-03-30	2016-05-03	2016-05-31	2016-07-02	2016-08-02	2016-09-03	2016-10-05	2016-11-02	14.5	14.1							90	90	92	92	92	92	92	92
31234	3	1	23	2	2016-03-30	2016-05-03	2016-05-31	2016-07-02	2016-08-02	2016-09-03	2016-10-05	2016-11-02	13.5	13	14.6	15	14.9	15.2	15.3	15.5	90	90	90	90	90	90	90	90
31235	3	1	24	2	2016-03-30	2016-05-03	2016-05-31	2016-07-02	2016-08-02	2016-09-03	2016-10-05	2016-11-02	13.5								90	92	92	92	92	92	92	92
31236	3	1	29	2	2016-03-30	2016-05-03	2016-05-31	2016-07-02	2016-08-02	2016-09-03	2016-10-05	2016-11-02	15.1	15.2			16	15.6	15.7	16.4	90	90	91	93	90	90	90	90
31237	3	1	36	1	2016-03-30	2016-05-03	2016-05-31	2016-07-02	2016-08-02	2016-09-03	2016-10-05	2016-11-02	14.1	14.5	14.8	15.4	14.6	15	15.5	15.7	90	90	90	90	90	90	90	90
31238	3	1	48	2	2016-03-30	2016-05-03	2016-05-31	2016-07-02	2016-08-02	2016-09-03	2016-10-05	2016-11-02	12.9	12.5	13	12.9	13.9	13.2	14.2	13.7	90	90	90	90	90	90	90	90
31239	3	1	36	1	2016-03-30	2016-05-03	2016-05-31	2016-07-02	2016-08-02	2016-09-03	2016-10-05	2016-11-02	14.9	15.1	15.5	13.5	13.9	14	14.5	15.5	90	90	90	90	90	90	90	90
31240	3	1	42	1	2016-03-30	2016-05-03	2016-05-31	2016-07-02	2016-08-02	2016-09-03	2016-10-05	2016-11-02	14.5	14.2	14.5	14.5	14.3	14	14.2	14.5	90	90	90	90	90	90	90	90
71241	7	1	21	1	2016-03-30	2016-05-03	2016-05-31	2016-07-02	2016-08-02	2016-09-03	2016-10-05	2016-11-02	15.6	14.9	14.6						90	90	90	91	92	92	92	92
71242	7	1	57	1	2016-03-30	2016-05-03	2016-05-31	2016-07-02	2016-08-02	2016-09-03	2016-10-05	2016-11-02	14.1	13.8	14.3	14.3	14.2	13.9	13.7	14.2	90	90	90	90	90	90	90	90
71243	7	1	23	1	2016-03-30	2016-05-03	2016-05-31	2016-07-02	2016-08-02	2016-09-03	2016-10-05	2016-11-02	16.1	15.4				15.9			90	90	91	91	91	90	92	92
71244	7	1	17	2	2016-03-30	2016-05-03	2016-05-31	2016-07-02	2016-08-02	2016-09-03	2016-10-05	2016-11-02	12.9	12.7	13.2	14.1	14	14.2	14.4	15	90	90	90	90	90	90	90	90
71245	7	1	46	2	2016-03-30	2016-05-03	2016-05-31	2016-07-02	2016-08-02	2016-09-03	2016-10-05	2016-11-02	14.3	14.6	14.9	14.9	14	15.4	14.6	14.7	90	90	90	90	90	90	90	90
71246	7	1	34	1	2016-03-30	2016-05-03	2016-05-31	2016-07-02	2016-08-02	2016-09-03	2016-10-05	2016-11-02	14.1	13.4	13.8	13.7	13.7	13.5	14.9	15.3	90	90	90	90	90	90	90	90
71247	7	1	15	2	2016-03-30	2016-05-03	2016-05-31	2016-07-02	2016-08-02	2016-09-03	2016-10-05	2016-11-02	13.2	13.7	13.9	13.6	14.2	13.7	14.2	13.5	90	90	90	90	90	90	90	90
71248	7	1	44	1	2016-03-30	2016-05-03	2016-05-31	2016-07-02	2016-08-02	2016-09-03	2016-10-05	2016-11-02	14.1	14.1	13.9	14.9	14.5	14.4	15.6	15.3	90	90	90	90	90	90	90	90
71249	7	1	35	1	2016-03-30	2016-05-03	2016-05-31	2016-07-02	2016-08-02	2016-09-03	2016-10-05	2016-11-02	14.4	15.8	15.6	16.2	16.2	16.4	17.1	16.9	90	90	90	90	90	90	90	90
71250	7	1	13	1	2016-03-30	2016-05-03	2016-05-31	2016-07-02	2016-08-02	2016-09-03	2016-10-05	2016-11-02	10.6	11.6	12.7						90	90	90	91	96	96	96	96
71251	7	1	27	1	2016-03-30	2016-05-03	2016-05-31	2016-07-02	2016-08-02	2016-09-03	2016-10-05	2016-11-02	11.6	13.1	13.2	13.7	13	14	14.2	14.4	90	90	90	90	90	90	90	90
71252	7	1	35	1	2016-03-30	2016-05-03	2016-05-31	2016-07-02	2016-08-02	2016-09-03	2016-10-05	2016-11-02	15.2	15.4	15.7	15.5	14.6	14.4	14.7	16.2	90	90	90	90	90	90	90	90
71253	7	1	27	1	2016-03-30	2016-05-03	2016-05-31	2016-07-02	2016-08-02	2016-09-03	2016-10-05	2016-11-02	14.9	16.2	15.9	15.9	15.8	16.4	16.4	17.2	90	90	90	90	90	90	90	90
71254	7	1	39	2	2016-03-30	2016-05-03	2016-05-31	2016-07-02	2016-08-02	2016-09-03	2016-10-05	2016-11-02	14.4	14.6	14.7	14.9	15	15.2	15.3	15.2	90	90	90	90	90	90	90	90
71255	7	1	26	1	2016-03-30	2016-05-03	2016-05-31	2016-07-02	2016-08-02	2016-09-03	2016-10-05	2016-11-02	15.7	13.1	15.3	15.9	16	15.9	16.3	16.1	90	90	90	90	90	90	90	90
71256	7	1	14	1	2016-03-30	2016-05-03	2016-05-31	2016-07-02	2016-08-02	2016-09-03	2016-10-05	2016-11-02	13.3	13.2	13.9	13.9	14.5	14.7	15.4	14.7	90	90	90	90	90	90	90	90
71257	7	1	40	1	2016-03-30	2016-05-03	2016-05-31	2016-07-02	2016-08-02	2016-09-03	2016-10-05	2016-11-02	14.2	14.2	13.9	14.8	14.6	14.6	15.4	15.3	90	90	90	90	90	90	90	90
71258	7	1	55	2	2016-03-30	2016-05-03	2016-05-31	2016-07-02	2016-08-02	2016-09-03	2016-10-05	2016-11-02	15.4	15.1	15.5	14.9	15.2	15.4	15.8	14.9	90	90	90	90	90	90	90	90
71259	7	1	27	1	2016-03-30	2016-05-03	2016-05-31	2016-07-02	2016-08-02	2016-09-03	2016-10-05	2016-11-02	14.6	14.3	14.2	14.7	14.2	14.4			90	90	90	90	90	90	92	92
71260	7	1	54	1	2016-03-30	2016-05-03	2016-05-31	2016-07-02	2016-08-02	2016-09-03	2016-10-05	2016-11-02	14.9	14.1	14.2	14.3	14.4	14.7			90	90	90	90	90	90	92	92
111261	11	0	40	2	2016-04-02	2016-05-04	2016-06-01	2016-07-10	2016-08-03	2016-09-04	2016-10-08	2016-11-05	15	16.2	15.5	15.3	15.4	16.3	15.5		90	90	90	90	90	90	90	94
111262	11	0	17	1	2016-04-02	2016-05-04	2016-06-01	2016-07-10	2016-08-03	2016-09-04	2016-10-08	2016-11-05	13.2	13.4	13.3	13	13.1	12.8	13	13.8	90	90	90	90	90	90	90	90
111263	11	0	46	1	2016-04-02	2016-05-04	2016-06-01	2016-07-10	2016-08-03	2016-09-04	2016-10-08	2016-11-05	13.2	13.7	13.5	13.1	13.5	13.5	13.4	14.5	90	90	90	90	90	90	90	90
111264	11	0	29	2	2016-04-02	2016-05-04	2016-06-01	2016-07-10	2016-08-03	2016-09-04	2016-10-08	2016-11-05	15	15.2	14.8	14.9	15	15.5	15.1	15.5	90	90	90	90	90	90	90	90
111265	11	0	24	1	2016-04-02	2016-05-04	2016-06-01	2016-07-10	2016-08-03	2016-09-04	2016-10-08	2016-11-05	13	14.1	13.6	14	14.2	14.8	15	15.4	90	90	90	90	90	90	90	90
111266	11	0	39	2	2016-04-02	2016-05-04	2016-06-01	2016-07-10	2016-08-03	2016-09-04	2016-10-08	2016-11-05	14.4	14.1	14	15	15.1	15.2	16	15.9	90	90	90	90	90	90	90	90
111267	11	0	20	2	2016-04-02	2016-05-04	2016-06-01	2016-07-10	2016-08-03	2016-09-04	2016-10-08	2016-11-05	14.5	14.8	14.5	14.7	14.6	14.5	15	15.1	90	90	90	90	90	90	90	90
111268	11	0	21	1	2016-04-02	2016-05-04	2016-06-01	2016-07-10	2016-08-03	2016-09-04	2016-10-08	2016-11-05	15	14.5	14	14.5					90	90	90	90	95	95	95	95
111269	11	0	39	2	2016-04-02	2016-05-04	2016-06-01	2016-07-10	2016-08-03	2016-09-04	2016-10-08	2016-11-05	18	18.6	18.1	18	18	18	18.5	18.6	90	90	90	90	90	90	90	90
111270	11	0	26	1	2016-04-02	2016-05-04	2016-06-01	2016-07-10	2016-08-03	2016-09-04	2016-10-08	2016-11-05	14	13.7	13.1	13		13.9	14.8	15.5	90	90	90	90	91	90	90	90
111271	11	0	46	2	2016-04-02	2016-05-04	2016-06-01	2016-07-10	2016-08-03	2016-09-04	2016-10-08	2016-11-05	14.5	14.7	13.8	14.3		14.1	14.7	15	90	90	90	90	91	90	90	90
111272	11	0	15	2	2016-04-02	2016-05-04	2016-06-01	2016-07-10	2016-08-03	2016-09-04	2016-10-08	2016-11-05	13.9	14.9	14.4		14.3		14.3	14.9	90	90	90	94	90	91	90	90
111273	11	0	22	2	2016-04-02	2016-05-04	2016-06-01	2016-07-10	2016-08-03	2016-09-04	2016-10-08	2016-11-05	13.8	14.7	13.9	13.5	14	14.8	14.5	14.1	90	90	90	90	90	90	90	90
111274	11	0	45	2	2016-04-02	2016-05-04	2016-06-01	2016-07-10	2016-08-03	2016-09-04	2016-10-08	2016-11-05	14.5	14.6	14		13.8	13.9	14.5	15	90	90	90	93	90	90	90	90
111275	11	0	41	1	2016-04-02	2016-05-04	2016-06-01	2016-07-10	2016-08-03	2016-09-04	2016-10-08	2016-11-05	14.6	14.7	13.3	13		14.1	14.5	14.6	90	90	90	90	91	90	90	90
111276	11	0	42	1	2016-04-02	2016-05-04	2016-06-01	2016-07-10	2016-08-03	2016-09-04	2016-10-08	2016-11-05	15.4	15.3	15.2	15.5	15.6	16.3	16.4	16.2	90	90	90	90	90	90	90	90
111277	11	0	46	1	2016-04-02	2016-05-04	2016-06-01	2016-07-10	2016-08-03	2016-09-04	2016-10-08	2016-11-05	13	13.5	13.2	12.7	13.2	13.7	14		90	90	90	90	90	90	90	93
111278	11	0	27	2	2016-04-02	2016-05-04	2016-06-01	2016-07-10	2016-08-03	2016-09-04	2016-10-08	2016-11-05	14.4	15.2	15		14.9	15.2	15.5	16.1	90	90	90	92	90	90	90	90
111279	11	0	30	2	2016-04-02	2016-05-04	2016-06-01	2016-07-10	2016-08-03	2016-09-04	2016-10-08	2016-11-05	13.9	14	14.5	14.1	15.3	15.5	15.5	15.6	90	90	90	90	90	90	90	90
111280	11	0	32	1	2016-04-02	2016-05-04	2016-06-01	2016-07-10	2016-08-03	2016-09-04	2016-10-08	2016-11-05	14.7	15	14.8		14.5	14	14.5	15.8	90	90	90	93	90	90	90	90
81281	8	0	42	1	2016-04-02	2016-05-04	2016-06-01	2016-07-10	2016-08-03	2016-09-04	2016-10-08	2016-11-05	13.1	13.2	12.7	12.8	13.4	13.5	13.1		90	90	90	90	90	90	90	93
81282	8	0	18	2	2016-04-02	2016-05-04	2016-06-01	2016-07-10	2016-08-03	2016-09-04	2016-10-08	2016-11-05	12.8	12.1		12.4	12.7				90	90	93	90	90	93	93	93
81283	8	0	24	2	2016-04-02	2016-05-04	2016-06-01	2016-07-10	2016-08-03	2016-09-04	2016-10-08	2016-11-05	16	15.9	15.7		16	15.7	15.6		90	90	90	91	90	90	90	91
81284	8	0	42	1	2016-04-02	2016-05-04	2016-06-01	2016-07-10	2016-08-03	2016-09-04	2016-10-08	2016-11-05	15	15.8	16.1		15.5	14.9	15.2		90	90	90	91	90	90	90	91
191285	19	0	36	1	2016-04-02	2016-05-04	2016-06-01	2016-07-10	2016-08-03	2016-09-04	2016-10-08	2016-11-05	15	15.1	15.4	15	15.3	15.4	14.9	16	90	90	90	90	90	90	90	90
191286	19	0	15	2	2016-04-02	2016-05-04	2016-06-01	2016-07-10	2016-08-03	2016-09-04	2016-10-08	2016-11-05	15.3	14.9	15.2	15.3	15	14.8	15.1	16.3	90	90	90	90	90	90	90	90
191287	19	0	25	2	2016-04-02	2016-05-04	2016-06-01	2016-07-10	2016-08-03	2016-09-04	2016-10-08	2016-11-05	16.8	16.1			16				90	90	93	93	90	93	92	92
191288	19	0	13	1	2016-04-02	2016-05-04	2016-06-01	2016-07-10	2016-08-03	2016-09-04	2016-10-08	2016-11-05	16	15.8			15.6				90	90	93	93	90	93	92	92
191289	19	0	7	2	2016-04-02	2016-05-04	2016-06-01	2016-07-10	2016-08-03	2016-09-04	2016-10-08	2016-11-05	13.4	13.4	12.9	13.5	13.4	14	14.5	14.3	90	90	90	90	90	90	90	90
191290	19	0	30	1	2016-04-02	2016-05-04	2016-06-01	2016-07-10	2016-08-03	2016-09-04	2016-10-08	2016-11-05	15.2	15.6	15.3		14.8	15.4	15.5		90	90	90	91	90	90	90	92
191291	19	0	36	2	2016-04-02	2016-05-04	2016-06-01	2016-07-10	2016-08-03	2016-09-04	2016-10-08	2016-11-05	15.3	15.6	15.5	15.9	16.5	16.7	16.5	16.3	90	90	90	90	90	90	90	90
191292	19	0	28	1	2016-04-02	2016-05-04	2016-06-01	2016-07-10	2016-08-03	2016-09-04	2016-10-08	2016-11-05	13.5	13.1	13	13.6	14	14.2	14.3	13.8	90	90	90	90	90	90	90	90
191293	19	0	50	1	2016-04-02	2016-05-04	2016-06-01	2016-07-10	2016-08-03	2016-09-04	2016-10-08	2016-11-05	15	13.7	13.6	14.4	14.6	13.8			90	90	90	90	90	90	94	91
191294	19	0	14	1	2016-04-02	2016-05-04	2016-06-01	2016-07-10	2016-08-03	2016-09-04	2016-10-08	2016-11-05	12.5	12.3	12.4	13.1	12.7	12.8	13.3	13	90	90	90	90	90	90	90	90
191295	19	0	39	1	2016-04-02	2016-05-04	2016-06-01	2016-07-10	2016-08-03	2016-09-04	2016-10-08	2016-11-05	16	15.7	16	15.6	15.2	15.3	15.5	15.5	90	90	90	90	90	90	90	90
191296	19	0	24	2	2016-04-02	2016-05-04	2016-06-01	2016-07-10	2016-08-03	2016-09-04	2016-10-08	2016-11-05	14	13.9	14.2	13.9	13.8	13.5	13.8	14.2	90	90	90	90	90	90	90	90
191297	19	0	54	1	2016-04-02	2016-05-04	2016-06-01	2016-07-10	2016-08-03	2016-09-04	2016-10-08	2016-11-05	13.8	13.2	13.9	13.7	14.3	13.7	14.3	13.5	90	90	90	90	90	90	90	90
191298	19	0	18	1	2016-04-02	2016-05-04	2016-06-01	2016-07-10	2016-08-03	2016-09-04	2016-10-08	2016-11-05	12	11.8	12.8	12	12.8	12.4	13.6	12.9	90	90	90	90	90	90	90	90
191299	19	0	36	1	2016-04-02	2016-05-04	2016-06-01	2016-07-10	2016-08-03	2016-09-04	2016-10-08	2016-11-05	14.1	13.6	14.4	14.5	15	14.8	14.7	14.8	90	90	90	90	90	90	90	90
191300	19	0	22	1	2016-04-02	2016-05-04	2016-06-01	2016-07-10	2016-08-03	2016-09-04	2016-10-08	2016-11-05	16	14.5		15	13.5	14	14	14.5	90	90	93	90	90	90	90	90
171301	17	0	13	2	2016-04-02	2016-05-04	2016-06-01	2016-07-10	2016-08-03	2016-09-04	2016-10-08	2016-11-05	14.3	15.6	15.5	14.9	12.6	14			90	90	90	90	90	90	96	96
171302	17	0	33	1	2016-04-02	2016-05-04	2016-06-01	2016-07-10	2016-08-03	2016-09-04	2016-10-08	2016-11-05	14	13.5	13.7	13.9	14.3	14.2	13.6	14	90	90	90	90	90	90	90	90
171303	17	0	57	2	2016-04-02	2016-05-04	2016-06-01	2016-07-10	2016-08-03	2016-09-04	2016-10-08	2016-11-05	14.2	14.4	14.3	15	14.9	14.6	14.8	14.6	90	90	90	90	90	90	90	90
171304	17	0	8	1	2016-04-02	2016-05-04	2016-06-01	2016-07-10	2016-08-03	2016-09-04	2016-10-08	2016-11-05	13.2	13.9	13.8	13.9	14	13.9	13.5	13.4	90	90	90	90	90	90	90	90
171305	17	0	33	2	2016-04-02	2016-05-04	2016-06-01	2016-07-10	2016-08-03	2016-09-04	2016-10-08	2016-11-05	13.8	14.3	13.8	14.1	14.2	14.4	14	13.8	90	90	90	90	90	90	90	90
171306	17	0	41	1	2016-04-02	2016-05-04	2016-06-01	2016-07-10	2016-08-03	2016-09-04	2016-10-08	2016-11-05	14.6	14.7	14.6	14.4	14.5	14.2	14.1	14.1	90	90	90	90	90	90	90	90
171307	17	0	39	2	2016-04-02	2016-05-04	2016-06-01	2016-07-10	2016-08-03	2016-09-04	2016-10-08	2016-11-05	15.1	15.4	15.6	15.4	15.3	15.6		15.2	90	90	90	90	90	90	91	90
171308	17	0	36	2	2016-04-02	2016-05-04	2016-06-01	2016-07-10	2016-08-03	2016-09-04	2016-10-08	2016-11-05	14	13.6	13.5	13.3	13.6	13.8	14.2	14.5	90	90	90	90	90	90	90	90
171309	17	0	55	1	2016-04-02	2016-05-04	2016-06-01	2016-07-10	2016-08-03	2016-09-04	2016-10-08	2016-11-05	15.5	15.6	15	14.6	14.4	14.3	15.5	14.3	90	90	90	90	90	90	90	90
171310	17	0	47	1	2016-04-02	2016-05-04	2016-06-01	2016-07-10	2016-08-03	2016-09-04	2016-10-08	2016-11-05	16.8		15.7	16.3	16.4	16.6	17		90	94	90	90	90	90	90	93
171311	17	0	46	1	2016-04-02	2016-05-04	2016-06-01	2016-07-10	2016-08-03	2016-09-04	2016-10-08	2016-11-05	16.5	16.2	16.6	16.5	16.6	16.5	16.6	16.1	90	90	90	90	90	90	90	90
171312	17	0	37	1	2016-04-02	2016-05-04	2016-06-01	2016-07-10	2016-08-03	2016-09-04	2016-10-08	2016-11-05	15.4	15.6	15.3	15.5	15.6	15.4	15.4	15.5	90	90	90	90	90	90	90	90
171313	17	0	45	2	2016-04-02	2016-05-04	2016-06-01	2016-07-10	2016-08-03	2016-09-04	2016-10-08	2016-11-05	15.4	15.5	15.4	15.7	15.6	15.8	16.5		90	90	90	90	90	90	90	94
171314	17	0	57	2	2016-04-02	2016-05-04	2016-06-01	2016-07-10	2016-08-03	2016-09-04	2016-10-08	2016-11-05	17.2	17.8	18.3	18.4	18.2	18.5	18.2	17.9	90	90	90	90	90	90	90	90
171315	17	0	28	2	2016-04-02	2016-05-04	2016-06-01	2016-07-10	2016-08-03	2016-09-04	2016-10-08	2016-11-05	16.1	17.1	16.6	16.3	16.5	15	14.4	14.5	90	90	90	90	90	90	90	90
171316	17	0	35	2	2016-04-02	2016-05-04	2016-06-01	2016-07-10	2016-08-03	2016-09-04	2016-10-08	2016-11-05	15.1	15.6	15.8	15.7	15.5	15.7	15	15.1	90	90	90	90	90	90	90	90
171317	17	0	44	2	2016-04-02	2016-05-04	2016-06-01	2016-07-10	2016-08-03	2016-09-04	2016-10-08	2016-11-05	14.5	14.9	14.8	14.6	14.5	14.6	14.7	14.1	90	90	90	90	90	90	90	90
171318	17	0	41	2	2016-04-02	2016-05-04	2016-06-01	2016-07-10	2016-08-03	2016-09-04	2016-10-08	2016-11-05	15.2	15	15.3	15	15.4	15.5	15.6	15.1	90	90	90	90	90	90	90	90
171319	17	0	46	1	2016-04-02	2016-05-04	2016-06-01	2016-07-10	2016-08-03	2016-09-04	2016-10-08	2016-11-05	16.1	16.7	16.4	16.5	16.8	17.2			90	90	90	90	90	90	96	92
171320	17	0	22	1	2016-04-02	2016-05-04	2016-06-01	2016-07-10	2016-08-03	2016-09-04	2016-10-08	2016-11-05	15.4	15.9	15.7	15	14.8	15			90	90	90	90	90	90	96	92
11321	1	1	29	2	2016-04-02	2016-05-04	2016-06-01	2016-07-10	2016-08-03	2016-09-04	2016-10-08	2016-11-05	15	14.3	13.4	13	13.9	14.3	13.9	14.2	90	90	90	90	90	90	90	90
11322	1	1	17	1	2016-04-02	2016-05-04	2016-06-01	2016-07-10	2016-08-03	2016-09-04	2016-10-08	2016-11-05	14.9	14.7	14.5	14.2	14.5	14.9	13.9	14.7	90	90	90	90	90	90	90	90
11323	1	1	41	2	2016-04-02	2016-05-04	2016-06-01	2016-07-10	2016-08-03	2016-09-04	2016-10-08	2016-11-05	18.4	18.2	18.5	17.3	17.6	17.5	18.2	18	90	90	90	90	90	90	90	90
11324	1	1	18	1	2016-04-02	2016-05-04	2016-06-01	2016-07-10	2016-08-03	2016-09-04	2016-10-08	2016-11-05	12								90	95	95	95	95	95	95	95
11325	1	1	10	1	2016-04-02	2016-05-04	2016-06-01	2016-07-10	2016-08-03	2016-09-04	2016-10-08	2016-11-05	14.9	14.7	14.4	13.9	13.9	13.1	13	13.3	90	90	90	90	90	90	90	90
11326	1	1	31	1	2016-04-02	2016-05-04	2016-06-01	2016-07-10	2016-08-03	2016-09-04	2016-10-08	2016-11-05	15.1	13.9	14		14.2	13.6	14.3	14	90	90	90	91	90	90	90	90
11327	1	1	20	2	2016-04-02	2016-05-04	2016-06-01	2016-07-10	2016-08-03	2016-09-04	2016-10-08	2016-11-05	13.6	12.2	12	12.5		12.7	12.5	13	90	90	90	90	93	90	90	90
11328	1	1	50	2	2016-04-02	2016-05-04	2016-06-01	2016-07-10	2016-08-03	2016-09-04	2016-10-08	2016-11-05	14.6	13.5	14.1					13.5	90	90	90	91	93	93	93	90
11329	1	1	41	2	2016-04-02	2016-05-04	2016-06-01	2016-07-10	2016-08-03	2016-09-04	2016-10-08	2016-11-05	16.4	15.4		15	15.5	15.4	14.5	15	90	90	91	90	90	90	90	90
11330	1	1	38	1	2016-04-02	2016-05-04	2016-06-01	2016-07-10	2016-08-03	2016-09-04	2016-10-08	2016-11-05	15.4	14.5	13.7	13.9	14.3	14	13.7	14.9	90	90	90	90	90	90	90	90
11331	1	1	10	1	2016-04-02	2016-05-04	2016-06-01	2016-07-10	2016-08-03	2016-09-04	2016-10-08	2016-11-05	12.7								90	95	95	95	95	95	95	95
11332	1	1	17	2	2016-04-02	2016-05-04	2016-06-01	2016-07-10	2016-08-03	2016-09-04	2016-10-08	2016-11-05	14.3	13.5	13.3	13.4	14.2	14.5	13.9	13	90	90	90	90	90	90	90	90
11333	1	1	26	1	2016-04-02	2016-05-04	2016-06-01	2016-07-10	2016-08-03	2016-09-04	2016-10-08	2016-11-05	15.8	14.8	14.5	14.6	14.9	14.6	14.6	14.6	90	90	90	90	90	90	90	90
11334	1	1	44	2	2016-04-02	2016-05-04	2016-06-01	2016-07-10	2016-08-03	2016-09-04	2016-10-08	2016-11-05	17.5	17.6	17	16.6	16.9	15.5	16.4	16.6	90	90	90	90	90	90	90	90
11335	1	1	40	1	2016-04-02	2016-05-04	2016-06-01	2016-07-10	2016-08-03	2016-09-04	2016-10-08	2016-11-05	16		15.9		16.4				90	91	90	91	90	92	92	92
11336	1	1	41	1	2016-04-02	2016-05-04	2016-06-01	2016-07-10	2016-08-03	2016-09-04	2016-10-08	2016-11-05	13.7	13.4	13.9		14.7	14.4	13.5	14.5	90	90	90	93	90	90	90	90
11337	1	1	26	2	2016-04-02	2016-05-04	2016-06-01	2016-07-10	2016-08-03	2016-09-04	2016-10-08	2016-11-05	15.8		16		15.9	15.6	15.9	16.5	90	91	90	93	90	90	90	90
11338	1	1	11	1	2016-04-02	2016-05-04	2016-06-01	2016-07-10	2016-08-03	2016-09-04	2016-10-08	2016-11-05	12.7	13.3	12.7	12.9	12.6				90	90	90	90	90	93	93	93
11339	1	1	18	1	2016-04-02	2016-05-04	2016-06-01	2016-07-10	2016-08-03	2016-09-04	2016-10-08	2016-11-05	13.8	15.4							90	90	93	91	92	92	92	92
11340	1	1	20	2	2016-04-02	2016-05-04	2016-06-01	2016-07-10	2016-08-03	2016-09-04	2016-10-08	2016-11-05	13.6	13	13.3						90	90	90	91	92	92	92	92
31341	3	1	32	2	2016-04-02	2016-05-04	2016-06-01	2016-07-10	2016-08-03	2016-09-04	2016-10-08	2016-11-05	13.9	14.7	13.9	14	14.1	14.2	15.1	14.5	90	90	90	90	90	90	90	90
31342	3	1	48	2	2016-04-02	2016-05-04	2016-06-01	2016-07-10	2016-08-03	2016-09-04	2016-10-08	2016-11-05	16.7	16.3	17.2	16.7	17.1	17	16.5	16.7	90	90	90	90	90	90	90	90
31343	3	1	34	2	2016-04-02	2016-05-04	2016-06-01	2016-07-10	2016-08-03	2016-09-04	2016-10-08	2016-11-05	14.9	15.1	15.2	15.8	15.8	15.5	16	15.7	90	90	90	90	90	90	90	90
31344	3	1	6	2	2016-04-02	2016-05-04	2016-06-01	2016-07-10	2016-08-03	2016-09-04	2016-10-08	2016-11-05	9.1	9.2	8.8	8	7	6.5			90	90	90	90	90	90	95	95
31345	3	1	20	2	2016-04-02	2016-05-04	2016-06-01	2016-07-10	2016-08-03	2016-09-04	2016-10-08	2016-11-05	12.1	12.8	12.8	13	13.1	14	14.2	13.7	90	90	90	90	90	90	90	90
31346	3	1	40	1	2016-04-02	2016-05-04	2016-06-01	2016-07-10	2016-08-03	2016-09-04	2016-10-08	2016-11-05	14.5	16.1	16	17	17.2	16.9	17.2	17	90	90	90	90	90	90	90	90
31347	3	1	36	1	2016-04-02	2016-05-04	2016-06-01	2016-07-10	2016-08-03	2016-09-04	2016-10-08	2016-11-05	12.3	13.2	12.8	14	14.2	14.1	14.3	14	90	90	90	90	90	90	90	90
31348	3	1	24	2	2016-04-02	2016-05-04	2016-06-01	2016-07-10	2016-08-03	2016-09-04	2016-10-08	2016-11-05	12.8	13.3	13.2	13.5	13.8	13.6	13.4	13.8	90	90	90	90	90	90	90	90
31349	3	1	49	2	2016-04-02	2016-05-04	2016-06-01	2016-07-10	2016-08-03	2016-09-04	2016-10-08	2016-11-05	14.9	14.4	14.3	14.3	14.5	14.3	14	15.1	90	90	90	90	90	90	90	90
31350	3	1	18	1	2016-04-02	2016-05-04	2016-06-01	2016-07-10	2016-08-03	2016-09-04	2016-10-08	2016-11-05	13.5	13.7	13.8	13.7	13.6	13.5	14.5	14.8	90	90	90	90	90	90	90	90
31351	3	1	54	2	2016-04-02	2016-05-04	2016-06-01	2016-07-10	2016-08-03	2016-09-04	2016-10-08	2016-11-05	14.5	14.6	14.9	15.5	15	15.1	15.4	15.3	90	90	90	90	90	90	90	90
31352	3	1	45	2	2016-04-02	2016-05-04	2016-06-01	2016-07-10	2016-08-03	2016-09-04	2016-10-08	2016-11-05	13.9	15.2	14.1	14.2	15.1				90	90	90	90	90	93	93	93
31353	3	1	38	2	2016-04-02	2016-05-04	2016-06-01	2016-07-10	2016-08-03	2016-09-04	2016-10-08	2016-11-05	13.6	12.2	13.4	13.6	13.7	13.6	14	14	90	90	90	90	90	90	90	90
31354	3	1	30	1	2016-04-02	2016-05-04	2016-06-01	2016-07-10	2016-08-03	2016-09-04	2016-10-08	2016-11-05	11.5	13.3	12	12.3	13	12.5	13.5	13.6	90	90	90	90	90	90	90	90
31355	3	1	14	1	2016-04-02	2016-05-04	2016-06-01	2016-07-10	2016-08-03	2016-09-04	2016-10-08	2016-11-05	13.2	12.5	13.3	13.9	14.6	14	13.4	13.7	90	90	90	90	90	90	90	90
31356	3	1	21	1	2016-04-02	2016-05-04	2016-06-01	2016-07-10	2016-08-03	2016-09-04	2016-10-08	2016-11-05	14.6	13.2	12.9	13.9	15.5	15.4	15.7	15.1	90	90	90	90	90	90	90	90
31357	3	1	50	2	2016-04-02	2016-05-04	2016-06-01	2016-07-10	2016-08-03	2016-09-04	2016-10-08	2016-11-05	14.5								90	92	92	92	92	92	92	92
31358	3	1	18	2	2016-04-02	2016-05-04	2016-06-01	2016-07-10	2016-08-03	2016-09-04	2016-10-08	2016-11-05	13.1	13.3							90	90	92	92	92	92	92	92
31359	3	1	59	1	2016-04-02	2016-05-04	2016-06-01	2016-07-10	2016-08-03	2016-09-04	2016-10-08	2016-11-05	13.5	13.1	14	14.5	13.5			14.1	90	90	90	90	90	93	92	90
31360	3	1	48	2	2016-04-02	2016-05-04	2016-06-01	2016-07-10	2016-08-03	2016-09-04	2016-10-08	2016-11-05	12.5	11.2	11.9		12.1			14.5	90	90	90	91	90	93	92	90
71361	7	1	23	1	2016-04-02	2016-05-04	2016-06-01	2016-07-10	2016-08-03	2016-09-04	2016-10-08	2016-11-05	14.6	14.4	14.4	15.1	15.4	15.3	15.7		90	90	90	90	90	90	90	93
71362	7	1	34	1	2016-04-02	2016-05-04	2016-06-01	2016-07-10	2016-08-03	2016-09-04	2016-10-08	2016-11-05	13.8	14.2	14.6	14.1	14.7	14.5			90	90	90	90	90	90	93	93
71363	7	1	22	1	2016-04-02	2016-05-04	2016-06-01	2016-07-10	2016-08-03	2016-09-04	2016-10-08	2016-11-05	13.3	13.4	13.3	13.8	14.1	14.3	14.3	14.8	90	90	90	90	90	90	90	90
71364	7	1	34	1	2016-04-02	2016-05-04	2016-06-01	2016-07-10	2016-08-03	2016-09-04	2016-10-08	2016-11-05	15.1					15.2	14.6		90	93	93	93	93	90	90	93
71365	7	1	46	2	2016-04-02	2016-05-04	2016-06-01	2016-07-10	2016-08-03	2016-09-04	2016-10-08	2016-11-05	14.4	14.4	13.9	13.6	13.9	14.4	14.2	14.4	90	90	90	90	90	90	90	90
71366	7	1	19	2	2016-04-02	2016-05-04	2016-06-01	2016-07-10	2016-08-03	2016-09-04	2016-10-08	2016-11-05	14.6	15.3	14.9	15.3		15.2	15.1	15.8	90	90	90	90	91	90	90	90
71367	7	1	35	2	2016-04-02	2016-05-04	2016-06-01	2016-07-10	2016-08-03	2016-09-04	2016-10-08	2016-11-05	14.9	14.8	14.9	15.2	15.4	15.4	15.2	15	90	90	90	90	90	90	90	90
71368	7	1	6	2	2016-04-02	2016-05-04	2016-06-01	2016-07-10	2016-08-03	2016-09-04	2016-10-08	2016-11-05	11.5	11.7	11.6	12.3		12.2	12.2	13.1	90	90	90	90	91	90	90	90
71369	7	1	34	2	2016-04-02	2016-05-04	2016-06-01	2016-07-10	2016-08-03	2016-09-04	2016-10-08	2016-11-05	14.9	15.2	15.2	15.7	15.7	15.8	15.8		90	90	90	90	90	90	90	92
71370	7	1	47	1	2016-04-02	2016-05-04	2016-06-01	2016-07-10	2016-08-03	2016-09-04	2016-10-08	2016-11-05	13.6	13.9	14.8	14.9	14.6	14.7	14.7	14.3	90	90	90	90	90	90	90	90
71371	7	1	20	1	2016-04-02	2016-05-04	2016-06-01	2016-07-10	2016-08-03	2016-09-04	2016-10-08	2016-11-05	14.7	14.6	15.4	15.2	15.1	15.1	15.1	15.6	90	90	90	90	90	90	90	90
71372	7	1	43	2	2016-04-02	2016-05-04	2016-06-01	2016-07-10	2016-08-03	2016-09-04	2016-10-08	2016-11-05	15.9	15.9	15.8	15.7	15.2	15.2	15.2	15.1	90	90	90	90	90	90	90	90
71373	7	1	54	1	2016-04-02	2016-05-04	2016-06-01	2016-07-10	2016-08-03	2016-09-04	2016-10-08	2016-11-05	15.9	16.1	15.9	15.8	15.9	15.7	16.2	15.5	90	90	90	90	90	90	90	90
71374	7	1	19	2	2016-04-02	2016-05-04	2016-06-01	2016-07-10	2016-08-03	2016-09-04	2016-10-08	2016-11-05	13.6	13.9	14.2	14.3	14.4	15.4	13.8	13.7	90	90	90	90	90	90	90	90
71375	7	1	37	1	2016-04-02	2016-05-04	2016-06-01	2016-07-10	2016-08-03	2016-09-04	2016-10-08	2016-11-05	12.6	12.7	12.7	12	12.8	13.1	13.2	12.9	90	90	90	90	90	90	90	90
71376	7	1	29	2	2016-04-02	2016-05-04	2016-06-01	2016-07-10	2016-08-03	2016-09-04	2016-10-08	2016-11-05	14.2	15.2	14.9	15.9	15.8	16.1	16.9	16.6	90	90	90	90	90	90	90	90
71377	7	1	52	2	2016-04-02	2016-05-04	2016-06-01	2016-07-10	2016-08-03	2016-09-04	2016-10-08	2016-11-05	15.1	14.3	13.4	12.5	13.4	14	14.2	14.7	90	90	90	90	90	90	90	90
71378	7	1	7	1	2016-04-02	2016-05-04	2016-06-01	2016-07-10	2016-08-03	2016-09-04	2016-10-08	2016-11-05	12.9	14.1	13.4	13.5	14.2	14.1	13.2		90	90	90	90	90	90	90	96
71379	7	1	34	2	2016-04-02	2016-05-04	2016-06-01	2016-07-10	2016-08-03	2016-09-04	2016-10-08	2016-11-05	14.9	14.4	14.5	14.6	15.1	14.8	15.2		90	90	90	90	90	90	90	96
71380	7	1	55	1	2016-04-02	2016-05-04	2016-06-01	2016-07-10	2016-08-03	2016-09-04	2016-10-08	2016-11-05	15.2	15.2	15.2	14.5	14.7	14.4	14.7		90	90	90	90	90	90	90	96
111381	11	0	22	2	2016-04-03	2016-05-07	2016-06-04	2016-07-10	2016-08-06	2016-09-05	2016-10-09	2016-11-06	10.9	12.3	11.9	11.6	12.7	12.6	12.2	12.7	90	90	90	90	90	90	90	90
111382	11	0	34	1	2016-04-03	2016-05-07	2016-06-04	2016-07-10	2016-08-06	2016-09-05	2016-10-09	2016-11-06	14.9	15.6	15.4	15	14.9	15.3	16	15.5	90	90	90	90	90	90	90	90
111383	11	0	58	2	2016-04-03	2016-05-07	2016-06-04	2016-07-10	2016-08-06	2016-09-05	2016-10-09	2016-11-06	16.3	16.5				16.6	16.5	16.4	90	90	92	92	92	90	90	90
111384	11	0	47	1	2016-04-03	2016-05-07	2016-06-04	2016-07-10	2016-08-06	2016-09-05	2016-10-09	2016-11-06	15	16.5				15.3	15	15.5	90	90	92	92	92	90	90	90
111385	11	0	20	2	2016-04-03	2016-05-07	2016-06-04	2016-07-10	2016-08-06	2016-09-05	2016-10-09	2016-11-06	14.8	14.9				13.6	14.2	14.4	90	90	92	92	92	90	90	90
111386	11	0	17	1	2016-04-03	2016-05-07	2016-06-04	2016-07-10	2016-08-06	2016-09-05	2016-10-09	2016-11-06	13	12.8	12.7	13	13.1	13.2	13.5	13.4	90	90	90	90	90	90	90	90
111387	11	0	34	1	2016-04-03	2016-05-07	2016-06-04	2016-07-10	2016-08-06	2016-09-05	2016-10-09	2016-11-06	13	16	16.3	16	17	17.8	17.1	17.3	90	90	90	90	90	90	90	90
111388	11	0	8	1	2016-04-03	2016-05-07	2016-06-04	2016-07-10	2016-08-06	2016-09-05	2016-10-09	2016-11-06	14.8	14.9	14.6	14.7	14.6	15	15.5	15.6	90	90	90	90	90	90	90	90
111389	11	0	19	2	2016-04-03	2016-05-07	2016-06-04	2016-07-10	2016-08-06	2016-09-05	2016-10-09	2016-11-06	13	13.1	13.2	13.5	13.1	13.2	14	13.6	90	90	90	90	90	90	90	90
111390	11	0	44	2	2016-04-03	2016-05-07	2016-06-04	2016-07-10	2016-08-06	2016-09-05	2016-10-09	2016-11-06	16	16.4	16.1						90	90	90	95	95	95	95	95
111391	11	0	34	2	2016-04-03	2016-05-07	2016-06-04	2016-07-10	2016-08-06	2016-09-05	2016-10-09	2016-11-06	12	13	11.2						90	90	90	93	95	95	95	95
111392	11	0	50	2	2016-04-03	2016-05-07	2016-06-04	2016-07-10	2016-08-06	2016-09-05	2016-10-09	2016-11-06	15	15.7	15.4	16	15.9	16.2	16.4	15.1	90	90	90	90	90	90	90	90
111393	11	0	20	1	2016-04-03	2016-05-07	2016-06-04	2016-07-10	2016-08-06	2016-09-05	2016-10-09	2016-11-06	12.1	12.6							90	90	95	95	95	95	95	95
111394	11	0	12	2	2016-04-03	2016-05-07	2016-06-04	2016-07-10	2016-08-06	2016-09-05	2016-10-09	2016-11-06	12.3	12.7	13	12.8	13.6	14	14.3	14.4	90	90	90	90	90	90	90	90
111395	11	0	38	1	2016-04-03	2016-05-07	2016-06-04	2016-07-10	2016-08-06	2016-09-05	2016-10-09	2016-11-06	15	15.4	15.6	14.9	15.1	15.4	15	15.2	90	90	90	90	90	90	90	90
111396	11	0	37	1	2016-04-03	2016-05-07	2016-06-04	2016-07-10	2016-08-06	2016-09-05	2016-10-09	2016-11-06	13.4		14.9	15.3	14.7	15.5	15	15.2	90	96	90	90	90	90	90	90
111397	11	0	14	1	2016-04-03	2016-05-07	2016-06-04	2016-07-10	2016-08-06	2016-09-05	2016-10-09	2016-11-06	13.2	12.6							90	90	95	95	95	95	95	95
111398	11	0	49	1	2016-04-03	2016-05-07	2016-06-04	2016-07-10	2016-08-06	2016-09-05	2016-10-09	2016-11-06	14.4	15	15.2	14.9		16.1	15.9	16	90	90	90	90	94	90	90	90
111399	11	0	45	1	2016-04-03	2016-05-07	2016-06-04	2016-07-10	2016-08-06	2016-09-05	2016-10-09	2016-11-06	14.2					14.4			90	92	92	92	92	90	94	93
111400	11	0	20	1	2016-04-03	2016-05-07	2016-06-04	2016-07-10	2016-08-06	2016-09-05	2016-10-09	2016-11-06	15	15.8	16.2	15	15.4	16	16.1	16.5	90	90	90	90	90	90	90	90
191401	19	0	22	2	2016-04-03	2016-05-07	2016-06-04	2016-07-10	2016-08-06	2016-09-05	2016-10-09	2016-11-06	13.9	14.8	13.7	13.4	13.6	13.8	13.5	14.2	90	90	90	90	90	90	90	90
191402	19	0	43	2	2016-04-03	2016-05-07	2016-06-04	2016-07-10	2016-08-06	2016-09-05	2016-10-09	2016-11-06	14.5	14.1	13.6	14	13.8	14.3	14.3	14	90	90	90	90	90	90	90	90
191403	19	0	9	2	2016-04-03	2016-05-07	2016-06-04	2016-07-10	2016-08-06	2016-09-05	2016-10-09	2016-11-06	12.5	12	11.4	11.7	11.4	12.7		11.4	90	90	90	90	90	90	94	90
191404	19	0	48	2	2016-04-03	2016-05-07	2016-06-04	2016-07-10	2016-08-06	2016-09-05	2016-10-09	2016-11-06	15.2	15.1	15	15.1	15.4	16	16.2	15.6	90	90	90	90	90	90	90	90
191405	19	0	24	1	2016-04-03	2016-05-07	2016-06-04	2016-07-10	2016-08-06	2016-09-05	2016-10-09	2016-11-06	12.5	12.4	12.5	12.3	12.6	13.6	13.6	12.9	90	90	90	90	90	90	90	90
191406	19	0	40	1	2016-04-03	2016-05-07	2016-06-04	2016-07-10	2016-08-06	2016-09-05	2016-10-09	2016-11-06	15.6	15.5	15.6						90	90	90	91	91	93	92	92
191407	19	0	44	2	2016-04-03	2016-05-07	2016-06-04	2016-07-10	2016-08-06	2016-09-05	2016-10-09	2016-11-06	14.5	14.6	14.5						90	90	90	91	91	93	92	92
191408	19	0	16	1	2016-04-03	2016-05-07	2016-06-04	2016-07-10	2016-08-06	2016-09-05	2016-10-09	2016-11-06	12.4	12.9	12.6	12.9	12.8	12.2	12.5	13.1	90	90	90	90	90	90	90	90
191409	19	0	43	2	2016-04-03	2016-05-07	2016-06-04	2016-07-10	2016-08-06	2016-09-05	2016-10-09	2016-11-06	13.3	12.4		14.5	14	14.6	14.7	14.5	90	90	94	90	90	90	90	90
191410	19	0	7	1	2016-04-03	2016-05-07	2016-06-04	2016-07-10	2016-08-06	2016-09-05	2016-10-09	2016-11-06	13.9	12.8	13.4	12.9	12.6	12.8	13.5	13.6	90	90	90	90	90	90	90	90
191411	19	0	19	1	2016-04-03	2016-05-07	2016-06-04	2016-07-10	2016-08-06	2016-09-05	2016-10-09	2016-11-06	13.6	13.4	13.9		12.8	12.9	12.8	13.4	90	90	90	91	90	90	90	90
191412	19	0	28	2	2016-04-03	2016-05-07	2016-06-04	2016-07-10	2016-08-06	2016-09-05	2016-10-09	2016-11-06	15.5	14.2	15						90	90	90	91	92	92	92	92
191413	19	0	43	2	2016-04-03	2016-05-07	2016-06-04	2016-07-10	2016-08-06	2016-09-05	2016-10-09	2016-11-06	14.5	14.3	14.4	14	14.3	14.7	14.2	14	90	90	90	90	90	90	90	90
191414	19	0	31	1	2016-04-03	2016-05-07	2016-06-04	2016-07-10	2016-08-06	2016-09-05	2016-10-09	2016-11-06	15	14.5		15.3	14	13.9	14	14.1	90	90	92	90	90	90	90	90
191415	19	0	31	1	2016-04-03	2016-05-07	2016-06-04	2016-07-10	2016-08-06	2016-09-05	2016-10-09	2016-11-06	11.3	11.5	11.4	11.4	14.3	12.3	12.3	12.5	90	90	90	90	90	90	90	90
191416	19	0	11	1	2016-04-03	2016-05-07	2016-06-04	2016-07-10	2016-08-06	2016-09-05	2016-10-09	2016-11-06	13.5	12.8	13.1	12.9	12.7	12.6	11.8		90	90	90	90	90	90	90	95
191417	19	0	48	2	2016-04-03	2016-05-07	2016-06-04	2016-07-10	2016-08-06	2016-09-05	2016-10-09	2016-11-06	16	14.9	15	14.8	14.6	15.3	14.9	15	90	90	90	90	90	90	90	90
191418	19	0	43	2	2016-04-03	2016-05-07	2016-06-04	2016-07-10	2016-08-06	2016-09-05	2016-10-09	2016-11-06	15.5	15.4	14.5		15	15.5	15.6	15.7	90	90	90	91	90	90	90	90
191419	19	0	15	2	2016-04-03	2016-05-07	2016-06-04	2016-07-10	2016-08-06	2016-09-05	2016-10-09	2016-11-06	13.3	14.4	14.1	15	14.8	14.2	14.3	14.7	90	90	90	90	90	90	90	90
191420	19	0	24	2	2016-04-03	2016-05-07	2016-06-04	2016-07-10	2016-08-06	2016-09-05	2016-10-09	2016-11-06	13.4	12.7	13	13	12.7	13.3	13.4	13.3	90	90	90	90	90	90	90	90
171421	17	0	23	2	2016-04-03	2016-05-07	2016-06-04	2016-07-10	2016-08-06	2016-09-05	2016-10-09	2016-11-06	13.7	14.4		15.1	15.3	15.4			90	90	94	90	90	90	92	92
171422	17	0	31	1	2016-04-03	2016-05-07	2016-06-04	2016-07-10	2016-08-06	2016-09-05	2016-10-09	2016-11-06	16.8	16.4	16.2	16.1	15.8	16.3	16.3	16.4	90	90	90	90	90	90	90	90
171423	17	0	9	2	2016-04-03	2016-05-07	2016-06-04	2016-07-10	2016-08-06	2016-09-05	2016-10-09	2016-11-06	12	12.6	12.2	12.5	13	13.8	14	14.4	90	90	90	90	90	90	90	90
171424	17	0	51	1	2016-04-03	2016-05-07	2016-06-04	2016-07-10	2016-08-06	2016-09-05	2016-10-09	2016-11-06	15.7	15.8	16.3	15.5	15.6	15.4	15.4	14.6	90	90	90	90	90	90	90	90
171425	17	0	25	2	2016-04-03	2016-05-07	2016-06-04	2016-07-10	2016-08-06	2016-09-05	2016-10-09	2016-11-06	15.3		15						90	94	90	93	96	96	96	92
171426	17	0	39	2	2016-04-03	2016-05-07	2016-06-04	2016-07-10	2016-08-06	2016-09-05	2016-10-09	2016-11-06	15.9	15.6	15.8	15.5	15.5	15.8		16.1	90	90	90	90	90	90	92	90
171427	17	0	47	1	2016-04-03	2016-05-07	2016-06-04	2016-07-10	2016-08-06	2016-09-05	2016-10-09	2016-11-06	15.4	15.6		15.7	15.8	15.7	16		90	90	93	90	90	90	90	94
171428	17	0	15	1	2016-04-03	2016-05-07	2016-06-04	2016-07-10	2016-08-06	2016-09-05	2016-10-09	2016-11-06	14.4	14.1	14.3	14.2	14.5	14.6	14.2	14.3	90	90	90	90	90	90	90	90
171429	17	0	34	2	2016-04-03	2016-05-07	2016-06-04	2016-07-10	2016-08-06	2016-09-05	2016-10-09	2016-11-06	14	14.3	14.2	14.4	14.7	14.9	14.4	14.1	90	90	90	90	90	90	90	90
171430	17	0	31	2	2016-04-03	2016-05-07	2016-06-04	2016-07-10	2016-08-06	2016-09-05	2016-10-09	2016-11-06	14.2	14.5	14.7	14.9	15	15.1	14.7	14.2	90	90	90	90	90	90	90	90
171431	17	0	44	1	2016-04-03	2016-05-07	2016-06-04	2016-07-10	2016-08-06	2016-09-05	2016-10-09	2016-11-06	17	16.8	17	16.9	16.7	17.3	16.8	16.2	90	90	90	90	90	90	90	90
171432	17	0	36	2	2016-04-03	2016-05-07	2016-06-04	2016-07-10	2016-08-06	2016-09-05	2016-10-09	2016-11-06	13.5	13.7	13.3	13.2	13.5	13.9	14	13.4	90	90	90	90	90	90	90	90
171433	17	0	47	2	2016-04-03	2016-05-07	2016-06-04	2016-07-10	2016-08-06	2016-09-05	2016-10-09	2016-11-06	15	14.7	14.8	14.7	14.5	14.4	15	14.4	90	90	90	90	90	90	90	90
171434	17	0	16	2	2016-04-03	2016-05-07	2016-06-04	2016-07-10	2016-08-06	2016-09-05	2016-10-09	2016-11-06	13.7	13.3	13.6	13.7	13.6	13.7	13.5	12.2	90	90	90	90	90	90	90	90
171435	17	0	46	1	2016-04-03	2016-05-07	2016-06-04	2016-07-10	2016-08-06	2016-09-05	2016-10-09	2016-11-06	16.8	17.1	16.8	16.3	16.5	16.6	16.3	16	90	90	90	90	90	90	90	90
171436	17	0	33	1	2016-04-03	2016-05-07	2016-06-04	2016-07-10	2016-08-06	2016-09-05	2016-10-09	2016-11-06	14.9	14.5	14.7	14.9	14.8	14.5	15	14.7	90	90	90	90	90	90	90	90
171437	17	0	15	2	2016-04-03	2016-05-07	2016-06-04	2016-07-10	2016-08-06	2016-09-05	2016-10-09	2016-11-06	16.4	16.1	15.6	15.3	15.5	15.7	15.4	15.7	90	90	90	90	90	90	90	90
171438	17	0	54	1	2016-04-03	2016-05-07	2016-06-04	2016-07-10	2016-08-06	2016-09-05	2016-10-09	2016-11-06	14.4	15	15.4	15.6	15.4	15.2	15.4	14.8	90	90	90	90	90	90	90	90
171439	17	0	14	2	2016-04-03	2016-05-07	2016-06-04	2016-07-10	2016-08-06	2016-09-05	2016-10-09	2016-11-06	14.3	14.4	14.6	14.8	14.4	14	14.9	14.3	90	90	90	90	90	90	90	90
171440	17	0	21	1	2016-04-03	2016-05-07	2016-06-04	2016-07-10	2016-08-06	2016-09-05	2016-10-09	2016-11-06	14.4	14.9	15.4	15.7	16.1	16.4	16.5	16.7	90	90	90	90	90	90	90	90
11441	1	1	38	2	2016-04-03	2016-05-07	2016-06-04	2016-07-10	2016-08-06	2016-09-05	2016-10-09	2016-11-06	13.7								90	93	92	92	92	92	92	92
11442	1	1	20	2	2016-04-03	2016-05-07	2016-06-04	2016-07-10	2016-08-06	2016-09-05	2016-10-09	2016-11-06	14.8	13.9	14.6	15		15.5	15.1	15	90	90	90	90	93	90	90	90
11443	1	1	14	1	2016-04-03	2016-05-07	2016-06-04	2016-07-10	2016-08-06	2016-09-05	2016-10-09	2016-11-06	12.5	13							90	90	92	92	92	92	92	92
11444	1	1	12	1	2016-04-03	2016-05-07	2016-06-04	2016-07-10	2016-08-06	2016-09-05	2016-10-09	2016-11-06	11.7	12.9							90	90	92	92	92	92	92	92
61445	6	1	44	1	2016-04-03	2016-05-07	2016-06-04	2016-07-10	2016-08-06	2016-09-05	2016-10-09	2016-11-06	15.9	15.7	16	15.7	16.1	16.5	16.1	15.8	90	90	90	90	90	90	90	90
61446	6	1	32	1	2016-04-03	2016-05-07	2016-06-04	2016-07-10	2016-08-06	2016-09-05	2016-10-09	2016-11-06	15	15.6	15.4	15.1	16.4	16.6	15.5	15.4	90	90	90	90	90	90	90	90
61447	6	1	26	2	2016-04-03	2016-05-07	2016-06-04	2016-07-10	2016-08-06	2016-09-05	2016-10-09	2016-11-06	13.3	13.7	13.7	13.5	13.7	13.9	13.5	13.5	90	90	90	90	90	90	90	90
61448	6	1	32	1	2016-04-03	2016-05-07	2016-06-04	2016-07-10	2016-08-06	2016-09-05	2016-10-09	2016-11-06	13.4	13.8	14.2	14	13.9	14.6	13.3	13.6	90	90	90	90	90	90	90	90
61449	6	1	34	2	2016-04-03	2016-05-07	2016-06-04	2016-07-10	2016-08-06	2016-09-05	2016-10-09	2016-11-06	15.5	15.6	16.9	16.6	15.7		15.9	15.5	90	90	90	90	90	93	90	90
61450	6	1	37	1	2016-04-03	2016-05-07	2016-06-04	2016-07-10	2016-08-06	2016-09-05	2016-10-09	2016-11-06	14.9	15.8	15		14	15.5	14.9	15.4	90	90	90	91	90	90	90	90
61451	6	1	46	1	2016-04-03	2016-05-07	2016-06-04	2016-07-10	2016-08-06	2016-09-05	2016-10-09	2016-11-06	15.8	17.5	18.8		17.8	18.5	17.6	17.9	90	90	90	91	90	90	90	90
61452	6	1	38	2	2016-04-03	2016-05-07	2016-06-04	2016-07-10	2016-08-06	2016-09-05	2016-10-09	2016-11-06	14.1	14.5	14.2		14.6	15.2	15.1	15.5	90	90	90	91	90	90	90	90
61453	6	1	23	2	2016-04-03	2016-05-07	2016-06-04	2016-07-10	2016-08-06	2016-09-05	2016-10-09	2016-11-06	14.8	14.4	14.5		14.9	15.1	15	15	90	90	90	91	90	90	90	90
61454	6	1	39	2	2016-04-03	2016-05-07	2016-06-04	2016-07-10	2016-08-06	2016-09-05	2016-10-09	2016-11-06	14.6	14	14.1	14.2	14.1	14.9	14.6	14.8	90	90	90	90	90	90	90	90
61455	6	1	17	2	2016-04-03	2016-05-07	2016-06-04	2016-07-10	2016-08-06	2016-09-05	2016-10-09	2016-11-06	13.7	13.1	12.6	11.6	13.3	14.2	14.1	14.4	90	90	90	90	90	90	90	90
61456	6	1	33	1	2016-04-03	2016-05-07	2016-06-04	2016-07-10	2016-08-06	2016-09-05	2016-10-09	2016-11-06	12.5	12.1	13.2	12.9	13.2	14.1	14.1	13.2	90	90	90	90	90	90	90	90
61457	6	1	19	2	2016-04-03	2016-05-07	2016-06-04	2016-07-10	2016-08-06	2016-09-05	2016-10-09	2016-11-06	13	12.9	13.5	13.3	13.4	14.5	14	13.7	90	90	90	90	90	90	90	90
61458	6	1	26	2	2016-04-03	2016-05-07	2016-06-04	2016-07-10	2016-08-06	2016-09-05	2016-10-09	2016-11-06	13.1	12.5	13.3	13.8	13.2	13	11.5	12	90	90	90	90	90	90	90	90
61459	6	1	51	1	2016-04-03	2016-05-07	2016-06-04	2016-07-10	2016-08-06	2016-09-05	2016-10-09	2016-11-06	14.7	13.6	14.1	13.9	13.8	14.5	13.9	14.1	90	90	90	90	90	90	90	90
61460	6	1	44	2	2016-04-03	2016-05-07	2016-06-04	2016-07-10	2016-08-06	2016-09-05	2016-10-09	2016-11-06	15.7	14.8							90	90	93	93	93	93	93	93
31461	3	1	15	2	2016-04-03	2016-05-07	2016-06-04	2016-07-10	2016-08-06	2016-09-05	2016-10-09	2016-11-06	13.2	13.7	14	13.5	14	13.4	14	14.6	90	90	90	90	90	90	90	90
31462	3	1	38	1	2016-04-03	2016-05-07	2016-06-04	2016-07-10	2016-08-06	2016-09-05	2016-10-09	2016-11-06	14.1	13.1	14	14	13.5	14.1	14.5	15.4	90	90	90	90	90	90	90	90
31463	3	1	13	1	2016-04-03	2016-05-07	2016-06-04	2016-07-10	2016-08-06	2016-09-05	2016-10-09	2016-11-06	13.1	13.3		13.4	13.5				90	90	92	90	90	93	93	91
31464	3	1	42	2	2016-04-03	2016-05-07	2016-06-04	2016-07-10	2016-08-06	2016-09-05	2016-10-09	2016-11-06	14.1	14.3		14.4	14.1	14.7	14.5	13.1	90	90	92	90	90	90	90	90
31465	3	1	42	2	2016-04-03	2016-05-07	2016-06-04	2016-07-10	2016-08-06	2016-09-05	2016-10-09	2016-11-06	14.2	13.5	13.6	14	14	14.4	14		90	90	90	90	90	90	90	93
31466	3	1	41	2	2016-04-03	2016-05-07	2016-06-04	2016-07-10	2016-08-06	2016-09-05	2016-10-09	2016-11-06	16.1		16.1	17	17.1	16.7	16	16.2	90	92	90	90	90	90	90	90
31467	3	1	42	2	2016-04-03	2016-05-07	2016-06-04	2016-07-10	2016-08-06	2016-09-05	2016-10-09	2016-11-06	15.3	15.5	15.7	15.3	15.5	15.7	15.8	16	90	90	90	90	90	90	90	90
31468	3	1	57	2	2016-04-03	2016-05-07	2016-06-04	2016-07-10	2016-08-06	2016-09-05	2016-10-09	2016-11-06	13.3	14	14.3	14.2	14.3	14.5	14.1	14.2	90	90	90	90	90	90	90	90
31469	3	1	10	1	2016-04-03	2016-05-07	2016-06-04	2016-07-10	2016-08-06	2016-09-05	2016-10-09	2016-11-06	14.2	14.6	14	14.2	14	14.1	13.7	14	90	90	90	90	90	90	90	90
31470	3	1	42	2	2016-04-03	2016-05-07	2016-06-04	2016-07-10	2016-08-06	2016-09-05	2016-10-09	2016-11-06	15.4	14.7	13.8	14.7	14.6	15.4	14.8	15	90	90	90	90	90	90	90	90
31471	3	1	48	2	2016-04-03	2016-05-07	2016-06-04	2016-07-10	2016-08-06	2016-09-05	2016-10-09	2016-11-06	14.1	15.8	13.5	15.7	15.9	15.8	15.5	15.8	90	90	90	90	90	90	90	90
31472	3	1	36	1	2016-04-03	2016-05-07	2016-06-04	2016-07-10	2016-08-06	2016-09-05	2016-10-09	2016-11-06	12.7	12.8	12.5	12.7	12.5	13.5	13.4	14	90	90	90	90	90	90	90	90
31473	3	1	35	1	2016-04-03	2016-05-07	2016-06-04	2016-07-10	2016-08-06	2016-09-05	2016-10-09	2016-11-06	15.5	14.8							90	90	93	93	93	92	92	92
31474	3	1	24	2	2016-04-03	2016-05-07	2016-06-04	2016-07-10	2016-08-06	2016-09-05	2016-10-09	2016-11-06	13.5	13.3	13.5	13.4	14.2	14.3	15	15.5	90	90	90	90	90	90	90	90
31475	3	1	59	1	2016-04-03	2016-05-07	2016-06-04	2016-07-10	2016-08-06	2016-09-05	2016-10-09	2016-11-06	13.2	12.8	12.6	13.4	13.5	13.6	14	13.5	90	90	90	90	90	90	90	90
31476	3	1	39	1	2016-04-03	2016-05-07	2016-06-04	2016-07-10	2016-08-06	2016-09-05	2016-10-09	2016-11-06	14.5	14.7	14.1	14.3	15	15.2	15.7	15.5	90	90	90	90	90	90	90	90
31477	3	1	24	1	2016-04-03	2016-05-07	2016-06-04	2016-07-10	2016-08-06	2016-09-05	2016-10-09	2016-11-06	13.5	13.8	13.9	14.3	14	14.1	14.3	15	90	90	90	90	90	90	90	90
31478	3	1	48	2	2016-04-03	2016-05-07	2016-06-04	2016-07-10	2016-08-06	2016-09-05	2016-10-09	2016-11-06	13.1	13.9	13.6	13.7	14	14.3	15.5	15.2	90	90	90	90	90	90	90	90
31479	3	1	36	2	2016-04-03	2016-05-07	2016-06-04	2016-07-10	2016-08-06	2016-09-05	2016-10-09	2016-11-06	14.3	14.1	14.4	14.5	15.5	14.3	14.5	14.7	90	90	90	90	90	90	90	90
31480	3	1	14	1	2016-04-03	2016-05-07	2016-06-04	2016-07-10	2016-08-06	2016-09-05	2016-10-09	2016-11-06	15.1	14.5	15.4	16	15.5	15.7	16	16.5	90	90	90	90	90	90	90	90
71481	7	1	22	1	2016-04-03	2016-05-07	2016-06-04	2016-07-10	2016-08-06	2016-09-05	2016-10-09	2016-11-06	14.1	12.6	13.2	13.8	13.4	13.6	13.2	13.4	90	90	90	90	90	90	90	90
71482	7	1	45	1	2016-04-03	2016-05-07	2016-06-04	2016-07-10	2016-08-06	2016-09-05	2016-10-09	2016-11-06	14.6	13.7	14.3	14.7	13.8	13.4	14.4	14.8	90	90	90	90	90	90	90	90
71483	7	1	52	2	2016-04-03	2016-05-07	2016-06-04	2016-07-10	2016-08-06	2016-09-05	2016-10-09	2016-11-06	15.1	15.2	14.4	15.4	15.4	14.9	15.5	15.7	90	90	90	90	90	90	90	90
71484	7	1	35	2	2016-04-03	2016-05-07	2016-06-04	2016-07-10	2016-08-06	2016-09-05	2016-10-09	2016-11-06	16.1	15.6	15.8	15.8	15.7	16.4	16.4	16.4	90	90	90	90	90	90	90	90
71485	7	1	22	1	2016-04-03	2016-05-07	2016-06-04	2016-07-10	2016-08-06	2016-09-05	2016-10-09	2016-11-06	16.4	15.7	16.2	15.6	15.7	16.1	16.3	15.3	90	90	90	90	90	90	90	90
71486	7	1	22	1	2016-04-03	2016-05-07	2016-06-04	2016-07-10	2016-08-06	2016-09-05	2016-10-09	2016-11-06	13.4	13.7	14.2	14.6	14.5	14.3	15.1	15.1	90	90	90	90	90	90	90	90
71487	7	1	44	1	2016-04-03	2016-05-07	2016-06-04	2016-07-10	2016-08-06	2016-09-05	2016-10-09	2016-11-06	15	14.6	14.1	13.8	13.8	14.4	14.3	14.3	90	90	90	90	90	90	90	90
71488	7	1	33	1	2016-04-03	2016-05-07	2016-06-04	2016-07-10	2016-08-06	2016-09-05	2016-10-09	2016-11-06	13.4	13.2	13.7	14.6	13.9	13.6		13.9	90	90	90	90	90	90	91	90
71489	7	1	27	2	2016-04-03	2016-05-07	2016-06-04	2016-07-10	2016-08-06	2016-09-05	2016-10-09	2016-11-06	13.2	13.2	12.2	12.7	13.7	13.4	15.4	14.8	90	90	90	90	90	90	90	90
71490	7	1	30	2	2016-04-03	2016-05-07	2016-06-04	2016-07-10	2016-08-06	2016-09-05	2016-10-09	2016-11-06	14.2	13.6	12.1	11.1	12.3	12.2	13.7	14.1	90	90	90	90	90	90	90	90
71491	7	1	34	1	2016-04-03	2016-05-07	2016-06-04	2016-07-10	2016-08-06	2016-09-05	2016-10-09	2016-11-06	14.9	15.3	14.7	15.2	15.2	15.2	15.3	15.6	90	90	90	90	90	90	90	90
71492	7	1	55	2	2016-04-03	2016-05-07	2016-06-04	2016-07-10	2016-08-06	2016-09-05	2016-10-09	2016-11-06	15.7	14.7	14.5	15.4	15.9	15.6	16.4	16.2	90	90	90	90	90	90	90	90
71493	7	1	34	2	2016-04-03	2016-05-07	2016-06-04	2016-07-10	2016-08-06	2016-09-05	2016-10-09	2016-11-06	13.8		14.7	12.4					90	93	90	90	95	95	95	95
71494	7	1	51	1	2016-04-03	2016-05-07	2016-06-04	2016-07-10	2016-08-06	2016-09-05	2016-10-09	2016-11-06	13.4	13.1	13.6	14	14.7	14.6	13.9	14.6	90	90	90	90	90	90	90	90
71495	7	1	26	2	2016-04-03	2016-05-07	2016-06-04	2016-07-10	2016-08-06	2016-09-05	2016-10-09	2016-11-06	13.7	13.2	13.7	13.3	14.4	13.7	14.2	14.2	90	90	90	90	90	90	90	90
71496	7	1	22	1	2016-04-03	2016-05-07	2016-06-04	2016-07-10	2016-08-06	2016-09-05	2016-10-09	2016-11-06	13.2	13.6	12.5	12.5	13.1	14.2	13.4	13.8	90	90	90	90	90	90	90	90
71497	7	1	39	2	2016-04-03	2016-05-07	2016-06-04	2016-07-10	2016-08-06	2016-09-05	2016-10-09	2016-11-06	14.6	14.8	15.9	16.3	16.1	16.4	16.8	16.4	90	90	90	90	90	90	90	90
71498	7	1	11	1	2016-04-03	2016-05-07	2016-06-04	2016-07-10	2016-08-06	2016-09-05	2016-10-09	2016-11-06	12.6	12.9	13.6	13.9	13.8	13.9	14	13.7	90	90	90	90	90	90	90	90
71499	7	1	29	1	2016-04-03	2016-05-07	2016-06-04	2016-07-10	2016-08-06	2016-09-05	2016-10-09	2016-11-06	14.1	13.9	14.5	15.1	15	15.4	14.7	14.2	90	90	90	90	90	90	90	90
71500	7	1	40	1	2016-04-03	2016-05-07	2016-06-04	2016-07-10	2016-08-06	2016-09-05	2016-10-09	2016-11-06	14.4	14.4	14.4	14.9	14.2	14.4	14.4	13.9	90	90	90	90	90	90	90	90
111501	11	0	44	2	2016-04-04	2016-05-07	2016-06-05	2016-07-11	2016-08-07	2016-09-06	2016-10-10	2016-11-07	14.4	15.4	15.1	14.4	15	15.3	15.2	15.6	90	90	90	90	90	90	90	90
111502	11	0	11	1	2016-04-04	2016-05-07	2016-06-05	2016-07-11	2016-08-07	2016-09-06	2016-10-10	2016-11-07	12	12.4	12.1	12.2	12.4	11.1	12.6	12.9	90	90	90	90	90	90	90	90
111503	11	0	22	1	2016-04-04	2016-05-07	2016-06-05	2016-07-11	2016-08-07	2016-09-06	2016-10-10	2016-11-07	16	17	16.9	16.7	16.1	16.4	16.5	16.6	90	90	90	90	90	90	90	90
111504	11	0	43	1	2016-04-04	2016-05-07	2016-06-05	2016-07-11	2016-08-07	2016-09-06	2016-10-10	2016-11-07	16.6	17.3	17	16.5	17	17.7	17.5	17.8	90	90	90	90	90	90	90	90
111505	11	0	42	2	2016-04-04	2016-05-07	2016-06-05	2016-07-11	2016-08-07	2016-09-06	2016-10-10	2016-11-07	14.7	15.7	15.5	15.8	15.5	15.5	16	16.1	90	90	90	90	90	90	90	90
111506	11	0	35	2	2016-04-04	2016-05-07	2016-06-05	2016-07-11	2016-08-07	2016-09-06	2016-10-10	2016-11-07	14.9	14.8	14.2	13.9	13.9	14	14.3	14.5	90	90	90	90	90	90	90	90
111507	11	0	10	1	2016-04-04	2016-05-07	2016-06-05	2016-07-11	2016-08-07	2016-09-06	2016-10-10	2016-11-07	13.7	14.7	14	13.9	13.5	14.5	15.3	15.4	90	90	90	90	90	90	90	90
111508	11	0	49	1	2016-04-04	2016-05-07	2016-06-05	2016-07-11	2016-08-07	2016-09-06	2016-10-10	2016-11-07	14	14.6	15	15.1	15	15.4	15.6	15.5	90	90	90	90	90	90	90	90
111509	11	0	14	1	2016-04-04	2016-05-07	2016-06-05	2016-07-11	2016-08-07	2016-09-06	2016-10-10	2016-11-07	13.5	14.5	14.6			14.1	14.6	14.8	90	90	90	93	93	90	90	90
111510	11	0	46	2	2016-04-04	2016-05-07	2016-06-05	2016-07-11	2016-08-07	2016-09-06	2016-10-10	2016-11-07	13	13.5	13.4	13.5	13.1	13.4	14.1		90	90	90	90	90	90	90	92
111511	11	0	57	2	2016-04-04	2016-05-07	2016-06-05	2016-07-11	2016-08-07	2016-09-06	2016-10-10	2016-11-07	14.3	14.7	14.5	14.4	14.4	14.2	15.5		90	90	90	90	90	90	90	92
111512	11	0	23	1	2016-04-04	2016-05-07	2016-06-05	2016-07-11	2016-08-07	2016-09-06	2016-10-10	2016-11-07	15	15.7	15.4	15	15	15.3	15.5	16	90	90	90	90	90	90	90	90
111513	11	0	40	1	2016-04-04	2016-05-07	2016-06-05	2016-07-11	2016-08-07	2016-09-06	2016-10-10	2016-11-07	13	13.8	14.1	14.2	14.2	14.1	14.9	15	90	90	90	90	90	90	90	90
111514	11	0	19	2	2016-04-04	2016-05-07	2016-06-05	2016-07-11	2016-08-07	2016-09-06	2016-10-10	2016-11-07	11.7	11.9	12.2	12.1	11.8	12.2	13	13.8	90	90	90	90	90	90	90	90
111515	11	0	26	1	2016-04-04	2016-05-07	2016-06-05	2016-07-11	2016-08-07	2016-09-06	2016-10-10	2016-11-07	11.2	12.9	11.8	11	11.4	11.8	11.3	12.1	90	90	90	90	90	90	90	90
111516	11	0	43	1	2016-04-04	2016-05-07	2016-06-05	2016-07-11	2016-08-07	2016-09-06	2016-10-10	2016-11-07	16	17.2	17	16.4	17	17.2	18	19	90	90	90	90	90	90	90	90
111517	11	0	20	2	2016-04-04	2016-05-07	2016-06-05	2016-07-11	2016-08-07	2016-09-06	2016-10-10	2016-11-07	13.5	15.5	14.4	14.7	15	15	15.1	16	90	90	90	90	90	90	90	90
111518	11	0	55	1	2016-04-04	2016-05-07	2016-06-05	2016-07-11	2016-08-07	2016-09-06	2016-10-10	2016-11-07	15	15.4	15.7	15.5	16.3	15.4	16	15.8	90	90	90	90	90	90	90	90
111519	11	0	14	2	2016-04-04	2016-05-07	2016-06-05	2016-07-11	2016-08-07	2016-09-06	2016-10-10	2016-11-07	13.7	14.5	14.1	13.5	14.2	13.8	14.5	15.2	90	90	90	90	90	90	90	90
111520	11	0	21	1	2016-04-04	2016-05-07	2016-06-05	2016-07-11	2016-08-07	2016-09-06	2016-10-10	2016-11-07	14	14.7	14.3		14.6				90	90	90	93	90	92	92	92
191521	19	0	23	2	2016-04-04	2016-05-07	2016-06-05	2016-07-11	2016-08-07	2016-09-06	2016-10-10	2016-11-07	15.4	15.5	15.8	15.2	14.9	16.2	16	15.5	90	90	90	90	90	90	90	90
191522	19	0	44	2	2016-04-04	2016-05-07	2016-06-05	2016-07-11	2016-08-07	2016-09-06	2016-10-10	2016-11-07	16.6	16.1	16.3	16.4	16	16.3	16.2	16.3	90	90	90	90	90	90	90	90
191523	19	0	26	1	2016-04-04	2016-05-07	2016-06-05	2016-07-11	2016-08-07	2016-09-06	2016-10-10	2016-11-07	12.4	12	12.5	13	13.8	14	13.4	13.4	90	90	90	90	90	90	90	90
191524	19	0	38	2	2016-04-04	2016-05-07	2016-06-05	2016-07-11	2016-08-07	2016-09-06	2016-10-10	2016-11-07	14.2	14.1	14.3	14.5	14.7	15.1	14.9	14.5	90	90	90	90	90	90	90	90
191525	19	0	8	2	2016-04-04	2016-05-07	2016-06-05	2016-07-11	2016-08-07	2016-09-06	2016-10-10	2016-11-07	13	12.6	12.8	13.1	13.4	13.6	13.7	14	90	90	90	90	90	90	90	90
191526	19	0	54	1	2016-04-04	2016-05-07	2016-06-05	2016-07-11	2016-08-07	2016-09-06	2016-10-10	2016-11-07	14.9	15.3	15.4	15	14.9	15.1	15.3	15.4	90	90	90	90	90	90	90	90
191527	19	0	54	2	2016-04-04	2016-05-07	2016-06-05	2016-07-11	2016-08-07	2016-09-06	2016-10-10	2016-11-07	14.8		14.2	13.5	13.7	14.5	14.7	15.3	90	91	90	90	90	90	90	90
191528	19	0	55	1	2016-04-04	2016-05-07	2016-06-05	2016-07-11	2016-08-07	2016-09-06	2016-10-10	2016-11-07	16.7	16.3	16.1	15.1	15.5	16.4	16.5	15.1	90	90	90	90	90	90	90	90
191529	19	0	45	2	2016-04-04	2016-05-07	2016-06-05	2016-07-11	2016-08-07	2016-09-06	2016-10-10	2016-11-07	15.3	15.4	15.5	15.2	14.8	16.3	15.7	16.5	90	90	90	90	90	90	90	90
191530	19	0	8	1	2016-04-04	2016-05-07	2016-06-05	2016-07-11	2016-08-07	2016-09-06	2016-10-10	2016-11-07	12.9	12.3	11.4	11.3	12.9	13.9	13.8	14.4	90	90	90	90	90	90	90	90
191531	19	0	46	2	2016-04-04	2016-05-07	2016-06-05	2016-07-11	2016-08-07	2016-09-06	2016-10-10	2016-11-07	14.3	14.9	14.7	13.9	14.3	14.8	14.7	15	90	90	90	90	90	90	90	90
191532	19	0	44	2	2016-04-04	2016-05-07	2016-06-05	2016-07-11	2016-08-07	2016-09-06	2016-10-10	2016-11-07	14.5	13.3	14.5	14	14.2	14.5	14.4	14.5	90	90	90	90	90	90	90	90
191533	19	0	36	2	2016-04-04	2016-05-07	2016-06-05	2016-07-11	2016-08-07	2016-09-06	2016-10-10	2016-11-07	15	14.5	13.5	14	13.6	12.7	13.3	13.5	90	90	90	90	90	90	90	90
191534	19	0	23	2	2016-04-04	2016-05-07	2016-06-05	2016-07-11	2016-08-07	2016-09-06	2016-10-10	2016-11-07	14.3	14.1	14.4	14.9					90	90	90	90	92	92	92	92
191535	19	0	12	1	2016-04-04	2016-05-07	2016-06-05	2016-07-11	2016-08-07	2016-09-06	2016-10-10	2016-11-07	13.2	11.9	12	12.1					90	90	90	90	92	92	92	92
191536	19	0	40	1	2016-04-04	2016-05-07	2016-06-05	2016-07-11	2016-08-07	2016-09-06	2016-10-10	2016-11-07	16.3	15.7	16.5						90	90	90	91	92	92	92	92
191537	19	0	10	1	2016-04-04	2016-05-07	2016-06-05	2016-07-11	2016-08-07	2016-09-06	2016-10-10	2016-11-07	12.7	13.2	13.5	12.6					90	90	90	90	92	92	92	92
191538	19	0	52	1	2016-04-04	2016-05-07	2016-06-05	2016-07-11	2016-08-07	2016-09-06	2016-10-10	2016-11-07	16	15.3	15.5	15.8	15.7	16.1	16.3	15.6	90	90	90	90	90	90	90	90
191539	19	0	18	1	2016-04-04	2016-05-07	2016-06-05	2016-07-11	2016-08-07	2016-09-06	2016-10-10	2016-11-07	14.6	12.6	13.3	14	14.3	14.6	14.8	15.5	90	90	90	90	90	90	90	90
191540	19	0	17	1	2016-04-04	2016-05-07	2016-06-05	2016-07-11	2016-08-07	2016-09-06	2016-10-10	2016-11-07	13.5	13.6	13.7	13	13.3	13.6	13.8	13.8	90	90	90	90	90	90	90	90
171541	17	0	9	1	2016-04-04	2016-05-07	2016-06-05	2016-07-11	2016-08-07	2016-09-06	2016-10-10	2016-11-07	14.9	15.1	15.4	15	15.6		15.7		90	90	90	90	90	93	90	93
171542	17	0	33	1	2016-04-04	2016-05-07	2016-06-05	2016-07-11	2016-08-07	2016-09-06	2016-10-10	2016-11-07	13.6	13.7	14	14.5			14.5		90	90	90	90	91	93	90	92
171543	17	0	47	2	2016-04-04	2016-05-07	2016-06-05	2016-07-11	2016-08-07	2016-09-06	2016-10-10	2016-11-07	15.2	15.6	15.5	15.6	15.4	15.5	15.6		90	90	90	90	90	90	90	92
171544	17	0	48	2	2016-04-04	2016-05-07	2016-06-05	2016-07-11	2016-08-07	2016-09-06	2016-10-10	2016-11-07	16.4								90	96	92	92	92	92	92	92
171545	17	0	38	1	2016-04-04	2016-05-07	2016-06-05	2016-07-11	2016-08-07	2016-09-06	2016-10-10	2016-11-07	14.9	14.7	15.1	14.9	14.6	14.3	15.1		90	90	90	90	90	90	90	92
171546	17	0	28	2	2016-04-04	2016-05-07	2016-06-05	2016-07-11	2016-08-07	2016-09-06	2016-10-10	2016-11-07	14.3	14.1	14.3	13.8	14.3	14.1	14.4		90	90	90	90	90	90	90	92
171547	17	0	47	1	2016-04-04	2016-05-07	2016-06-05	2016-07-11	2016-08-07	2016-09-06	2016-10-10	2016-11-07	14.8	14.9	15.2	15	14.9	15		15.1	90	90	90	90	90	90	91	90
171548	17	0	38	1	2016-04-04	2016-05-07	2016-06-05	2016-07-11	2016-08-07	2016-09-06	2016-10-10	2016-11-07	16.2	16.3	16.4	16.3	16.7	16.5	16.3	16.1	90	90	90	90	90	90	90	90
171549	17	0	37	2	2016-04-04	2016-05-07	2016-06-05	2016-07-11	2016-08-07	2016-09-06	2016-10-10	2016-11-07	16	15.8	15.6	16	16.1	16.7	16.5	16	90	90	90	90	90	90	90	90
171550	17	0	44	1	2016-04-04	2016-05-07	2016-06-05	2016-07-11	2016-08-07	2016-09-06	2016-10-10	2016-11-07	15.4	15.4	15	14.9	15	14.8	15.1	14.8	90	90	90	90	90	90	90	90
171551	17	0	32	2	2016-04-04	2016-05-07	2016-06-05	2016-07-11	2016-08-07	2016-09-06	2016-10-10	2016-11-07	14	13.5	15.6	15.1	15	14.5	14.2	13.6	90	90	90	90	90	90	90	90
171552	17	0	52	2	2016-04-04	2016-05-07	2016-06-05	2016-07-11	2016-08-07	2016-09-06	2016-10-10	2016-11-07	18.6	18.3	17.5	17.9	17.5	17		17.1	90	90	90	90	90	90	94	90
171553	17	0	41	2	2016-04-04	2016-05-07	2016-06-05	2016-07-11	2016-08-07	2016-09-06	2016-10-10	2016-11-07	17	16.8	16.5		16.2	16.5	16.6	17.2	90	90	90	93	90	90	90	90
171554	17	0	34	2	2016-04-04	2016-05-07	2016-06-05	2016-07-11	2016-08-07	2016-09-06	2016-10-10	2016-11-07	16.2	15.9	15.7	15.8	15.6	15.3		14.6	90	90	90	90	90	90	96	90
171555	17	0	36	2	2016-04-04	2016-05-07	2016-06-05	2016-07-11	2016-08-07	2016-09-06	2016-10-10	2016-11-07	14.2	14.3	14						90	90	90	96	93	93	93	92
171556	17	0	39	1	2016-04-04	2016-05-07	2016-06-05	2016-07-11	2016-08-07	2016-09-06	2016-10-10	2016-11-07	15.5	15.1	15.3			15.4	15.4	15	90	90	90	94	94	90	90	90
171557	17	0	26	1	2016-04-04	2016-05-07	2016-06-05	2016-07-11	2016-08-07	2016-09-06	2016-10-10	2016-11-07	14								90	94	93	93	93	93	93	93
171558	17	0	47	2	2016-04-04	2016-05-07	2016-06-05	2016-07-11	2016-08-07	2016-09-06	2016-10-10	2016-11-07	14.2	14.3	14	14.1	14	14.6	14.4	14.9	90	90	90	90	90	90	90	90
171559	17	0	15	2	2016-04-04	2016-05-07	2016-06-05	2016-07-11	2016-08-07	2016-09-06	2016-10-10	2016-11-07	15.2		15	15.6	15.5	15.3	15.5	15.8	90	96	90	90	90	90	90	90
171560	17	0	14	1	2016-04-04	2016-05-07	2016-06-05	2016-07-11	2016-08-07	2016-09-06	2016-10-10	2016-11-07	13.9	13.7	13.9						90	90	90	93	93	93	92	92
61561	6	1	26	1	2016-04-04	2016-05-07	2016-06-05	2016-07-11	2016-08-07	2016-09-06	2016-10-10	2016-11-07	14.3	14.1	15.4	14.6	14.8	15.4	14	14.6	90	90	90	90	90	90	90	90
61562	6	1	44	2	2016-04-04	2016-05-07	2016-06-05	2016-07-11	2016-08-07	2016-09-06	2016-10-10	2016-11-07	15.4	15.8	14.4	13.9			15.2	15.5	90	90	90	90	93	93	90	90
61563	6	1	21	2	2016-04-04	2016-05-07	2016-06-05	2016-07-11	2016-08-07	2016-09-06	2016-10-10	2016-11-07	13.5	13	13.3	13.1	13.4	14.1	15	15.3	90	90	90	90	90	90	90	90
61564	6	1	56	1	2016-04-04	2016-05-07	2016-06-05	2016-07-11	2016-08-07	2016-09-06	2016-10-10	2016-11-07	15	14.7	14.4	13.9	14.6	15.5		15	90	90	90	90	90	90	93	90
61565	6	1	14	1	2016-04-04	2016-05-07	2016-06-05	2016-07-11	2016-08-07	2016-09-06	2016-10-10	2016-11-07	14.3	14.9	14.6						90	90	90	93	93	93	93	93
61566	6	1	22	2	2016-04-04	2016-05-07	2016-06-05	2016-07-11	2016-08-07	2016-09-06	2016-10-10	2016-11-07	13	15	14.2	14.8	14.6	15.4	15.5	15.5	90	90	90	90	90	90	90	90
61567	6	1	46	2	2016-04-04	2016-05-07	2016-06-05	2016-07-11	2016-08-07	2016-09-06	2016-10-10	2016-11-07	15.4	15.2	16	14.2					90	90	90	90	93	93	93	93
61568	6	1	40	1	2016-04-04	2016-05-07	2016-06-05	2016-07-11	2016-08-07	2016-09-06	2016-10-10	2016-11-07	15.7	15.8	16.1	16.7	15.4	16.5	15	15.2	90	90	90	90	90	90	90	90
61569	6	1	9	1	2016-04-04	2016-05-07	2016-06-05	2016-07-11	2016-08-07	2016-09-06	2016-10-10	2016-11-07	12.6	12.9	12.6	12	11.6	12.5	12.4	12	90	90	90	90	90	90	90	90
61570	6	1	55	2	2016-04-04	2016-05-07	2016-06-05	2016-07-11	2016-08-07	2016-09-06	2016-10-10	2016-11-07	14.4	14.6	13.9	13.2	13.6	14.3	13.9	13.8	90	90	90	90	90	90	90	90
61571	6	1	32	1	2016-04-04	2016-05-07	2016-06-05	2016-07-11	2016-08-07	2016-09-06	2016-10-10	2016-11-07	13.4	12.6	13.8	13	13.1	13.5	13.1	13.4	90	90	90	90	90	90	90	90
61572	6	1	44	1	2016-04-04	2016-05-07	2016-06-05	2016-07-11	2016-08-07	2016-09-06	2016-10-10	2016-11-07	14.7	15	15.4	15.1	14.8	15	14.5	14.9	90	90	90	90	90	90	90	90
61573	6	1	15	1	2016-04-04	2016-05-07	2016-06-05	2016-07-11	2016-08-07	2016-09-06	2016-10-10	2016-11-07	11.5	11.5	12.4	13.2	12.4	13.6	12.1	12	90	90	90	90	90	90	90	90
61574	6	1	53	1	2016-04-04	2016-05-07	2016-06-05	2016-07-11	2016-08-07	2016-09-06	2016-10-10	2016-11-07	15.9	15.2	16.3	15.6	15.7				90	90	90	90	90	93	92	92
61575	6	1	51	2	2016-04-04	2016-05-07	2016-06-05	2016-07-11	2016-08-07	2016-09-06	2016-10-10	2016-11-07	15.1	15.5	15.8	14.5	14.6				90	90	90	90	90	92	92	92
61576	6	1	50	2	2016-04-04	2016-05-07	2016-06-05	2016-07-11	2016-08-07	2016-09-06	2016-10-10	2016-11-07	14.5	14	14.4	14.3	14.4	14.7	14.2	14.4	90	90	90	90	90	90	90	90
61577	6	1	39	1	2016-04-04	2016-05-07	2016-06-05	2016-07-11	2016-08-07	2016-09-06	2016-10-10	2016-11-07	15	14.7	15	14.8					90	90	90	90	93	93	92	92
61578	6	1	34	2	2016-04-04	2016-05-07	2016-06-05	2016-07-11	2016-08-07	2016-09-06	2016-10-10	2016-11-07	13.5	14.5	14	13.5	14.4	15.1	14.4	14.4	90	90	90	90	90	90	90	90
61579	6	1	19	2	2016-04-04	2016-05-07	2016-06-05	2016-07-11	2016-08-07	2016-09-06	2016-10-10	2016-11-07	11.8	11.5	11.7	11.9	12.4	12.5	11.4	14.9	90	90	90	90	90	90	90	90
61580	6	1	37	1	2016-04-04	2016-05-07	2016-06-05	2016-07-11	2016-08-07	2016-09-06	2016-10-10	2016-11-07	13.4	13.6	14.1	14.4	14.1	14.5	13.6	14	90	90	90	90	90	90	90	90
31581	3	1	8	2	2016-04-04	2016-05-07	2016-06-05	2016-07-11	2016-08-07	2016-09-06	2016-10-10	2016-11-07	9.1	10.9	11	12	13.1		12.8	12.4	90	90	90	90	90	93	90	90
31582	3	1	42	2	2016-04-04	2016-05-07	2016-06-05	2016-07-11	2016-08-07	2016-09-06	2016-10-10	2016-11-07	13.9	15.1	14	15	15.2	15.7	15.2	14.5	90	90	90	90	90	90	90	90
31583	3	1	23	2	2016-04-04	2016-05-07	2016-06-05	2016-07-11	2016-08-07	2016-09-06	2016-10-10	2016-11-07	14.1	14.2	14	14.1	14.1	15.1	14.5	14.2	90	90	90	90	90	90	90	90
31584	3	1	52	1	2016-04-04	2016-05-07	2016-06-05	2016-07-11	2016-08-07	2016-09-06	2016-10-10	2016-11-07	14.5	14.9	15.2	15	15.3	15.5	15.6	15	90	90	90	90	90	90	90	90
31585	3	1	45	2	2016-04-04	2016-05-07	2016-06-05	2016-07-11	2016-08-07	2016-09-06	2016-10-10	2016-11-07	14.7	14.8	14.5	12.5	14.2	13.2	14	15.2	90	90	90	90	90	90	90	90
31586	3	1	51	2	2016-04-04	2016-05-07	2016-06-05	2016-07-11	2016-08-07	2016-09-06	2016-10-10	2016-11-07	13.4	13.1	13.5		14.5				90	90	90	91	90	92	92	92
31587	3	1	33	2	2016-04-04	2016-05-07	2016-06-05	2016-07-11	2016-08-07	2016-09-06	2016-10-10	2016-11-07	14.1	14.1	15	15	15.2	14.5	15	15.5	90	90	90	90	90	90	90	90
31588	3	1	53	2	2016-04-04	2016-05-07	2016-06-05	2016-07-11	2016-08-07	2016-09-06	2016-10-10	2016-11-07	13.2	14.7	14.5	14.6	14.7	15	14.4	14.5	90	90	90	90	90	90	90	90
31589	3	1	46	2	2016-04-04	2016-05-07	2016-06-05	2016-07-11	2016-08-07	2016-09-06	2016-10-10	2016-11-07	15.1	15.2	15.4	15.5	15.9	15.9	15.5	14.2	90	90	90	90	90	90	90	90
31590	3	1	36	2	2016-04-04	2016-05-07	2016-06-05	2016-07-11	2016-08-07	2016-09-06	2016-10-10	2016-11-07	13.9	14	13.8	14	15.2	14.6	14.3	14.4	90	90	90	90	90	90	90	90
31591	3	1	41	2	2016-04-04	2016-05-07	2016-06-05	2016-07-11	2016-08-07	2016-09-06	2016-10-10	2016-11-07	15.4	15.1	14.9	15	15.1	15.5			90	90	90	90	90	90	93	93
31592	3	1	14	1	2016-04-04	2016-05-07	2016-06-05	2016-07-11	2016-08-07	2016-09-06	2016-10-10	2016-11-07	12.9	13.4	13.5	13.6	14	13.4			90	90	90	90	90	90	93	93
31593	3	1	21	2	2016-04-04	2016-05-07	2016-06-05	2016-07-11	2016-08-07	2016-09-06	2016-10-10	2016-11-07	12.5								90	92	92	92	92	92	92	92
31594	3	1	18	2	2016-04-04	2016-05-07	2016-06-05	2016-07-11	2016-08-07	2016-09-06	2016-10-10	2016-11-07	12.6	11.7	12.1	12	13	14	15	16.1	90	90	90	90	90	90	90	90
31595	3	1	42	2	2016-04-04	2016-05-07	2016-06-05	2016-07-11	2016-08-07	2016-09-06	2016-10-10	2016-11-07	15.9	15	15.3		15	16.7	16.7	15.7	90	90	90	93	90	90	90	90
31596	3	1	30	2	2016-04-04	2016-05-07	2016-06-05	2016-07-11	2016-08-07	2016-09-06	2016-10-10	2016-11-07	15.1	15.7	16.6		17.2	16	16.5	16	90	90	90	93	90	90	90	90
31597	3	1	7	2	2016-04-04	2016-05-07	2016-06-05	2016-07-11	2016-08-07	2016-09-06	2016-10-10	2016-11-07	12.4		13.1						90	91	90	95	95	95	95	95
31598	3	1	36	1	2016-04-04	2016-05-07	2016-06-05	2016-07-11	2016-08-07	2016-09-06	2016-10-10	2016-11-07	13.2	13.3	12.4	13.4	13.5				90	90	90	90	90	92	92	92
31599	3	1	24	1	2016-04-04	2016-05-07	2016-06-05	2016-07-11	2016-08-07	2016-09-06	2016-10-10	2016-11-07	14.5	14.6	14.5						90	90	90	91	93	92	92	92
31600	3	1	20	2	2016-04-04	2016-05-07	2016-06-05	2016-07-11	2016-08-07	2016-09-06	2016-10-10	2016-11-07	12.9	13.7	13.3	13.1	13.8	14.6	15.1	15.6	90	90	90	90	90	90	90	90
71601	7	1	17	1	2016-04-04	2016-05-07	2016-06-05	2016-07-11	2016-08-07	2016-09-06	2016-10-10	2016-11-07	14.6	12.7	12.9	13.3	14.3	13.6	13.6	13.7	90	90	90	90	90	90	90	90
71602	7	1	9	1	2016-04-04	2016-05-07	2016-06-05	2016-07-11	2016-08-07	2016-09-06	2016-10-10	2016-11-07	13.6	13.2	13.7	13.4	14.4	14.6	14.3	15.4	90	90	90	90	90	90	90	90
71603	7	1	47	1	2016-04-04	2016-05-07	2016-06-05	2016-07-11	2016-08-07	2016-09-06	2016-10-10	2016-11-07	16.8	16.1	16.1	16.4	16.4	16.2	16.4	16.4	90	90	90	90	90	90	90	90
71604	7	1	37	2	2016-04-04	2016-05-07	2016-06-05	2016-07-11	2016-08-07	2016-09-06	2016-10-10	2016-11-07	16.8	13.7	14.2	14.7	14.9	15.2	15.4	15.2	90	90	90	90	90	90	90	90
71605	7	1	58	1	2016-04-04	2016-05-07	2016-06-05	2016-07-11	2016-08-07	2016-09-06	2016-10-10	2016-11-07	15.1	14.6	14.2	14.2	14.2	14.4	14.2	14.4	90	90	90	90	90	90	90	90
71606	7	1	23	2	2016-04-04	2016-05-07	2016-06-05	2016-07-11	2016-08-07	2016-09-06	2016-10-10	2016-11-07	16.4	15.6	15.9	12.4	16.1	16.1	16.1	17.2	90	90	90	90	90	90	90	90
71607	7	1	31	2	2016-04-04	2016-05-07	2016-06-05	2016-07-11	2016-08-07	2016-09-06	2016-10-10	2016-11-07	14.2	13.7	13.2	15.5	13.1	13.2	13.6	14.2	90	90	90	90	90	90	90	90
71608	7	1	47	1	2016-04-04	2016-05-07	2016-06-05	2016-07-11	2016-08-07	2016-09-06	2016-10-10	2016-11-07	13.6	12.3	13.8	13.5	13.7	13.6	14.2	14.2	90	90	90	90	90	90	90	90
71609	7	1	12	2	2016-04-04	2016-05-07	2016-06-05	2016-07-11	2016-08-07	2016-09-06	2016-10-10	2016-11-07	14.4	14.1	14.2	14.3	15.4	15.8	15.8	16.7	90	90	90	90	90	90	90	90
71610	7	1	56	2	2016-04-04	2016-05-07	2016-06-05	2016-07-11	2016-08-07	2016-09-06	2016-10-10	2016-11-07	15.9	15.6	15.1	15.5	16.4	16.2	15.9	16.1	90	90	90	90	90	90	90	90
71611	7	1	34	1	2016-04-04	2016-05-07	2016-06-05	2016-07-11	2016-08-07	2016-09-06	2016-10-10	2016-11-07	16.2	15.1	15.9	15.3	16.4	16.2	14.8	15.7	90	90	90	90	90	90	90	90
71612	7	1	43	1	2016-04-04	2016-05-07	2016-06-05	2016-07-11	2016-08-07	2016-09-06	2016-10-10	2016-11-07	15.2	16.3	15.4	14.7	15.4	15.7	15.2	14.7	90	90	90	90	90	90	90	90
71613	7	1	38	1	2016-04-04	2016-05-07	2016-06-05	2016-07-11	2016-08-07	2016-09-06	2016-10-10	2016-11-07	14.1	14.1	13.8	15	14.4	14.2	14.1	14	90	90	90	90	90	90	90	90
71614	7	1	33	1	2016-04-04	2016-05-07	2016-06-05	2016-07-11	2016-08-07	2016-09-06	2016-10-10	2016-11-07	17.4	16.8	17.1	16.4	16.9	16.5	16.7	16.7	90	90	90	90	90	90	90	90
71615	7	1	44	2	2016-04-04	2016-05-07	2016-06-05	2016-07-11	2016-08-07	2016-09-06	2016-10-10	2016-11-07	13.8	13.6	13.7	14	14.2	14.6	14.4	14.1	90	90	90	90	90	90	90	90
71616	7	1	15	2	2016-04-04	2016-05-07	2016-06-05	2016-07-11	2016-08-07	2016-09-06	2016-10-10	2016-11-07	13.7			13.7	14.7	14.2	14.5	14.3	90	93	93	90	90	90	90	90
71617	7	1	28	1	2016-04-04	2016-05-07	2016-06-05	2016-07-11	2016-08-07	2016-09-06	2016-10-10	2016-11-07	15.4	15.6	16.1	16.1	16.1	16.2	16.7	16.3	90	90	90	90	90	90	90	90
71618	7	1	54	2	2016-04-04	2016-05-07	2016-06-05	2016-07-11	2016-08-07	2016-09-06	2016-10-10	2016-11-07	13.4	15	13.9	14.1	14.4	14.3	13.9	13.6	90	90	90	90	90	90	90	90
71619	7	1	51	1	2016-04-04	2016-05-07	2016-06-05	2016-07-11	2016-08-07	2016-09-06	2016-10-10	2016-11-07	14.7	14.1	14	14.3	14.8	15.2	14.4	14.6	90	90	90	90	90	90	90	90
71620	7	1	47	1	2016-04-04	2016-05-07	2016-06-05	2016-07-11	2016-08-07	2016-09-06	2016-10-10	2016-11-07	16.2	15.4	15.2	15.3	15.7	15.4	14.9	14.7	90	90	90	90	90	90	90	90
111621	11	0	50	2	2016-04-05	2016-05-08	2016-06-06	2016-07-11	2016-08-09	2016-07-09	2016-10-11	2016-11-08	17.8	17.9	17.7	16		15.6	16.3	17.3	90	90	90	90	91	90	90	90
111622	11	0	21	1	2016-04-05	2016-05-08	2016-06-06	2016-07-11	2016-08-09	2016-07-09	2016-10-11	2016-11-08	15	15.4	15.1	15.3		15	14.2	12.7	90	90	90	90	91	90	90	90
111623	11	0	22	1	2016-04-05	2016-05-08	2016-06-06	2016-07-11	2016-08-09	2016-07-09	2016-10-11	2016-11-08	14	15.5	14.2	15	15	14.2	15		90	90	90	90	90	90	90	96
111624	11	0	28	2	2016-04-05	2016-05-08	2016-06-06	2016-07-11	2016-08-09	2016-07-09	2016-10-11	2016-11-08	15.5	16	15.5	15	15.4	15	15.6		90	90	90	90	90	90	90	96
111625	11	0	18	1	2016-04-05	2016-05-08	2016-06-06	2016-07-11	2016-08-09	2016-07-09	2016-10-11	2016-11-08	11	11.3	11.5	11		12.8			90	90	90	90	94	90	91	93
111626	11	0	40	1	2016-04-05	2016-05-08	2016-06-06	2016-07-11	2016-08-09	2016-07-09	2016-10-11	2016-11-08	14.5	14.7	14.8	14.9	14.9	15.5	15.6	15	90	90	90	90	90	90	90	90
111627	11	0	46	2	2016-04-05	2016-05-08	2016-06-06	2016-07-11	2016-08-09	2016-07-09	2016-10-11	2016-11-08	14.2	15.6	15.7	15.5	15.1	15.4	15.7	15.6	90	90	90	90	90	90	90	90
111628	11	0	25	2	2016-04-05	2016-05-08	2016-06-06	2016-07-11	2016-08-09	2016-07-09	2016-10-11	2016-11-08	13	14.4	14.5	14	14	14.4	15	14.9	90	90	90	90	90	90	90	90
111629	11	0	15	1	2016-04-05	2016-05-08	2016-06-06	2016-07-11	2016-08-09	2016-07-09	2016-10-11	2016-11-08	14.1	15.8	13.6	12	11.9	12.1	12.5	12.9	90	90	90	90	90	90	90	90
111630	11	0	29	1	2016-04-05	2016-05-08	2016-06-06	2016-07-11	2016-08-09	2016-07-09	2016-10-11	2016-11-08	11.5	11.8	11.9	12	12.2	12.4	13	13.2	90	90	90	90	90	90	90	90
111631	11	0	46	2	2016-04-05	2016-05-08	2016-06-06	2016-07-11	2016-08-09	2016-07-09	2016-10-11	2016-11-08	13.2	14.4	15	15.5	16	17	16.5	17	90	90	90	90	90	90	90	90
111632	11	0	21	1	2016-04-05	2016-05-08	2016-06-06	2016-07-11	2016-08-09	2016-07-09	2016-10-11	2016-11-08	15.3	15.8	16	15.8	15.5	16	17	17.1	90	90	90	90	90	90	90	90
111633	11	0	20	1	2016-04-05	2016-05-08	2016-06-06	2016-07-11	2016-08-09	2016-07-09	2016-10-11	2016-11-08	13.7	13.5	13.7	13.8	13.6	14.8	13.6	13.9	90	90	90	90	90	90	90	90
111634	11	0	31	2	2016-04-05	2016-05-08	2016-06-06	2016-07-11	2016-08-09	2016-07-09	2016-10-11	2016-11-08	14	14.3	13.7	14	14.4	14.9	15	15.9	90	90	90	90	90	90	90	90
111635	11	0	19	1	2016-04-05	2016-05-08	2016-06-06	2016-07-11	2016-08-09	2016-07-09	2016-10-11	2016-11-08	14	15	14.7	14	15.2	14.8	15	15.2	90	90	90	90	90	90	90	90
111636	11	0	45	1	2016-04-05	2016-05-08	2016-06-06	2016-07-11	2016-08-09	2016-07-09	2016-10-11	2016-11-08	15.3	15.5	15.3	15	14.5	15.4	14.7	14.8	90	90	90	90	90	90	90	90
111637	11	0	50	1	2016-04-05	2016-05-08	2016-06-06	2016-07-11	2016-08-09	2016-07-09	2016-10-11	2016-11-08	15.5	16.2	15.4	15.2	15	15.5	15.7	15.8	90	90	90	90	90	90	90	90
111638	11	0	37	1	2016-04-05	2016-05-08	2016-06-06	2016-07-11	2016-08-09	2016-07-09	2016-10-11	2016-11-08	15.8	16.1	16.5	16.7	15.5	15.7	16	16.1	90	90	90	90	90	90	90	90
111639	11	0	43	1	2016-04-05	2016-05-08	2016-06-06	2016-07-11	2016-08-09	2016-07-09	2016-10-11	2016-11-08	16	16.5	16.3	16.4	16.7	17	17.1	17	90	90	90	90	90	90	90	90
111640	11	0	31	2	2016-04-05	2016-05-08	2016-06-06	2016-07-11	2016-08-09	2016-07-09	2016-10-11	2016-11-08	16.8	16.4	16.1	15.3	15.2	16.5	16.1	16.6	90	90	90	90	90	90	90	90
191641	19	0	42	2	2016-04-05	2016-05-08	2016-06-06	2016-07-11	2016-08-09	2016-07-09	2016-10-11	2016-11-08	14.2	14.3	14.7	14.5	14.3	14.3	14.4	15.3	90	90	90	90	90	90	90	90
191642	19	0	42	1	2016-04-05	2016-05-08	2016-06-06	2016-07-11	2016-08-09	2016-07-09	2016-10-11	2016-11-08	16.2	15.9	16.4	16.4	17	16.5	17	17.1	90	90	90	90	90	90	90	90
191643	19	0	20	1	2016-04-05	2016-05-08	2016-06-06	2016-07-11	2016-08-09	2016-07-09	2016-10-11	2016-11-08	14.3	14.2	15.1	15	15	15.1	15.6	15.4	90	90	90	90	90	90	90	90
191644	19	0	36	1	2016-04-05	2016-05-08	2016-06-06	2016-07-11	2016-08-09	2016-07-09	2016-10-11	2016-11-08	14.5	14.1	14.2	14	14.7				90	90	90	90	90	92	92	92
151645	15	0	23	2	2016-04-05	2016-05-08	2016-06-06	2016-07-11	2016-08-09	2016-07-09	2016-10-11	2016-11-08	14.5	14.3	14.5	14.6	14.3	14.8	14.7	14.7	90	90	90	90	90	90	90	90
151646	15	0	43	1	2016-04-05	2016-05-08	2016-06-06	2016-07-11	2016-08-09	2016-07-09	2016-10-11	2016-11-08	17.2	16.6	17	17		17.6	16.8	17	90	90	90	90	91	90	90	90
151647	15	0	36	2	2016-04-05	2016-05-08	2016-06-06	2016-07-11	2016-08-09	2016-07-09	2016-10-11	2016-11-08	15.9	15.7	15.5	15.7	15.4	16.1	16	16.3	90	90	90	90	90	90	90	90
151648	15	0	48	2	2016-04-05	2016-05-08	2016-06-06	2016-07-11	2016-08-09	2016-07-09	2016-10-11	2016-11-08	14.5	14	14.2	14.1	13.7	13.8	14.3	13.8	90	90	90	90	90	90	90	90
151649	15	0	48	1	2016-04-05	2016-05-08	2016-06-06	2016-07-11	2016-08-09	2016-07-09	2016-10-11	2016-11-08	14.4	14.7	14.1	14.5		14.5	14.4		90	90	90	90	91	90	90	91
151650	15	0	11	1	2016-04-05	2016-05-08	2016-06-06	2016-07-11	2016-08-09	2016-07-09	2016-10-11	2016-11-08	13.2	13.4	12.9	13.2	12.8	13.2	13		90	90	90	90	90	90	90	91
151651	15	0	47	1	2016-04-05	2016-05-08	2016-06-06	2016-07-11	2016-08-09	2016-07-09	2016-10-11	2016-11-08	15.5	14.3	15.3	14.9	14.3	14.7	14.3		90	90	90	90	90	90	90	91
151652	15	0	49	1	2016-04-05	2016-05-08	2016-06-06	2016-07-11	2016-08-09	2016-07-09	2016-10-11	2016-11-08	14.3	13.8	13.1	14.4	13.5	14.2	13.8	14.1	90	90	90	90	90	90	90	90
151653	15	0	52	2	2016-04-05	2016-05-08	2016-06-06	2016-07-11	2016-08-09	2016-07-09	2016-10-11	2016-11-08	17.3	17.1	17	16.9	16.5				90	90	90	90	90	92	92	92
151654	15	0	24	2	2016-04-05	2016-05-08	2016-06-06	2016-07-11	2016-08-09	2016-07-09	2016-10-11	2016-11-08	15.4	15	14.7	15.2	15				90	90	90	90	90	92	92	92
151655	15	0	40	1	2016-04-05	2016-05-08	2016-06-06	2016-07-11	2016-08-09	2016-07-09	2016-10-11	2016-11-08	14.5	14.5	15	15.3	15.1	15.4	15.8		90	90	90	90	90	90	90	91
151656	15	0	22	1	2016-04-05	2016-05-08	2016-06-06	2016-07-11	2016-08-09	2016-07-09	2016-10-11	2016-11-08	12.9	12.8	13.3	12.7	12.8	13	12.5		90	90	90	90	90	90	90	94
151657	15	0	37	1	2016-04-05	2016-05-08	2016-06-06	2016-07-11	2016-08-09	2016-07-09	2016-10-11	2016-11-08	16	15.9	15.3	15.2	14.9	14.6	15.3	15.7	90	90	90	90	90	90	90	90
151658	15	0	12	1	2016-04-05	2016-05-08	2016-06-06	2016-07-11	2016-08-09	2016-07-09	2016-10-11	2016-11-08	12	12.1	12.5	13.2	11.8	12.5	13.4	13.8	90	90	90	90	90	90	90	90
151659	15	0	34	2	2016-04-05	2016-05-08	2016-06-06	2016-07-11	2016-08-09	2016-07-09	2016-10-11	2016-11-08	12.8	13.3	13.1	13.5	13.7	13.9	14.5	14.6	90	90	90	90	90	90	90	90
151660	15	0	48	1	2016-04-05	2016-05-08	2016-06-06	2016-07-11	2016-08-09	2016-07-09	2016-10-11	2016-11-08	14.3	13.8	13.7	14	13.5	13.6	14	14.2	90	90	90	90	90	90	90	90
181661	18	0	7	2	2016-04-05	2016-05-08	2016-06-06	2016-07-11	2016-08-09	2016-07-09	2016-10-11	2016-11-08	12.2	12.7	13.1	13.7	14	14.5	14.6	14.9	90	90	90	90	90	90	90	90
181662	18	0	52	1	2016-04-05	2016-05-08	2016-06-06	2016-07-11	2016-08-09	2016-07-09	2016-10-11	2016-11-08	16.8	18.1	17.9	18	18.4	18.2	17.8	16.7	90	90	90	90	90	90	90	90
181663	18	0	28	1	2016-04-05	2016-05-08	2016-06-06	2016-07-11	2016-08-09	2016-07-09	2016-10-11	2016-11-08	14.8	14.7	14.9	15.3	15.9	15.5	14.9	15.2	90	90	90	90	90	90	90	90
181664	18	0	11	1	2016-04-05	2016-05-08	2016-06-06	2016-07-11	2016-08-09	2016-07-09	2016-10-11	2016-11-08	14.3	14.4	14.3	14.5	15	15.2	15.3	15.1	90	90	90	90	90	90	90	90
181665	18	0	27	2	2016-04-05	2016-05-08	2016-06-06	2016-07-11	2016-08-09	2016-07-09	2016-10-11	2016-11-08	17	17.2	16.9	16.7	16.9	16.8	16.5	16.5	90	90	90	90	90	90	90	90
181666	18	0	15	2	2016-04-05	2016-05-08	2016-06-06	2016-07-11	2016-08-09	2016-07-09	2016-10-11	2016-11-08	13.5	13.6		13.5	13.3	13.5			90	90	93	90	90	90	93	93
181667	18	0	39	2	2016-04-05	2016-05-08	2016-06-06	2016-07-11	2016-08-09	2016-07-09	2016-10-11	2016-11-08	15.9	15.7		16	15.7	16.1	16.3	16.3	90	90	93	90	90	90	90	90
181668	18	0	25	2	2016-04-05	2016-05-08	2016-06-06	2016-07-11	2016-08-09	2016-07-09	2016-10-11	2016-11-08	14.4	14.4	14.7	14.9	15.4	15.5	15.4	15.7	90	90	90	90	90	90	90	90
181669	18	0	25	2	2016-04-05	2016-05-08	2016-06-06	2016-07-11	2016-08-09	2016-07-09	2016-10-11	2016-11-08	13.7	13.3	13.7	13.8	13.9	14.1	14.7	15.3	90	90	90	90	90	90	90	90
181670	18	0	44	2	2016-04-05	2016-05-08	2016-06-06	2016-07-11	2016-08-09	2016-07-09	2016-10-11	2016-11-08	15.7	15.5	15.7	15.5	15.2	15.4	15.2	15.4	90	90	90	90	90	90	90	90
181671	18	0	55	1	2016-04-05	2016-05-08	2016-06-06	2016-07-11	2016-08-09	2016-07-09	2016-10-11	2016-11-08	14.7	14.5	14.8	14.7	14.5	14.4	14.2	14.7	90	90	90	90	90	90	90	90
181672	18	0	19	2	2016-04-05	2016-05-08	2016-06-06	2016-07-11	2016-08-09	2016-07-09	2016-10-11	2016-11-08	14	13.6	13.5	13.3	13.9	14	14.5	13.7	90	90	90	90	90	90	90	90
181673	18	0	47	2	2016-04-05	2016-05-08	2016-06-06	2016-07-11	2016-08-09	2016-07-09	2016-10-11	2016-11-08	15.1	14.8	13.9	14.3	14.1	14.5	15	14.9	90	90	90	90	90	90	90	90
181674	18	0	24	1	2016-04-05	2016-05-08	2016-06-06	2016-07-11	2016-08-09	2016-07-09	2016-10-11	2016-11-08	14.5	14.5	14.6	14.9	15.5	15.8	15.5	15.1	90	90	90	90	90	90	90	90
181675	18	0	55	2	2016-04-05	2016-05-08	2016-06-06	2016-07-11	2016-08-09	2016-07-09	2016-10-11	2016-11-08	15.7	15.5	15.9	15.7	16.5	16.1	16.5	16	90	90	90	90	90	90	90	90
181676	18	0	21	1	2016-04-05	2016-05-08	2016-06-06	2016-07-11	2016-08-09	2016-07-09	2016-10-11	2016-11-08	14	14.1	13.5	13.1	13	12.5	12.9	13.6	90	90	90	90	90	90	90	90
181677	18	0	8	1	2016-04-05	2016-05-08	2016-06-06	2016-07-11	2016-08-09	2016-07-09	2016-10-11	2016-11-08	10.7	12	12.6	13.3	14.1	13.9			90	90	90	90	90	90	92	92
181678	18	0	27	2	2016-04-05	2016-05-08	2016-06-06	2016-07-11	2016-08-09	2016-07-09	2016-10-11	2016-11-08	16.9	16.3	16.4	16.6	15.5	15.4			90	90	90	90	90	90	92	92
181679	18	0	34	2	2016-04-05	2016-05-08	2016-06-06	2016-07-11	2016-08-09	2016-07-09	2016-10-11	2016-11-08	12.5								90	92	92	92	92	92	92	92
181680	18	0	36	2	2016-04-05	2016-05-08	2016-06-06	2016-07-11	2016-08-09	2016-07-09	2016-10-11	2016-11-08	14.6	14.8	14.5	14.7	14.5	14.7	14.4	14.9	90	90	90	90	90	90	90	90
61681	6	1	53	2	2016-04-05	2016-05-08	2016-06-06	2016-07-11	2016-08-09	2016-07-09	2016-10-11	2016-11-08	12	11.8	13.1	13.2	12.9	13.8	13	13.8	90	90	90	90	90	90	90	90
61682	6	1	9	1	2016-04-05	2016-05-08	2016-06-06	2016-07-11	2016-08-09	2016-07-09	2016-10-11	2016-11-08	10.6	11.4							90	90	95	95	95	95	95	95
61683	6	1	50	1	2016-04-05	2016-05-08	2016-06-06	2016-07-11	2016-08-09	2016-07-09	2016-10-11	2016-11-08	15	15.1	14.4	13.9	14.7	14.8	14.5	14.1	90	90	90	90	90	90	90	90
61684	6	1	27	2	2016-04-05	2016-05-08	2016-06-06	2016-07-11	2016-08-09	2016-07-09	2016-10-11	2016-11-08	11.7	12.3	12.1	11	11.7	12.4	11.1	11.2	90	90	90	90	90	90	90	90
61685	6	1	51	1	2016-04-05	2016-05-08	2016-06-06	2016-07-11	2016-08-09	2016-07-09	2016-10-11	2016-11-08	14.3	14	13.1	13.3	14.3	14.1	14.4	14.4	90	90	90	90	90	90	90	90
61686	6	1	52	2	2016-04-05	2016-05-08	2016-06-06	2016-07-11	2016-08-09	2016-07-09	2016-10-11	2016-11-08	14.1	13.7	13.6	14.1	14.4	14.6	14.3		90	90	90	90	90	90	90	94
61687	6	1	39	1	2016-04-05	2016-05-08	2016-06-06	2016-07-11	2016-08-09	2016-07-09	2016-10-11	2016-11-08	12.3	11.6	11.9	11.4	12.4	12.2	12.3	12.5	90	90	90	90	90	90	90	90
61688	6	1	53	2	2016-04-05	2016-05-08	2016-06-06	2016-07-11	2016-08-09	2016-07-09	2016-10-11	2016-11-08	14.9	14.8	14.8	14.9	15.4	16.3	15.6	16.4	90	90	90	90	90	90	90	90
61689	6	1	13	1	2016-04-05	2016-05-08	2016-06-06	2016-07-11	2016-08-09	2016-07-09	2016-10-11	2016-11-08	12.6	15.2	13						90	90	90	96	96	96	95	95
61690	6	1	13	2	2016-04-05	2016-05-08	2016-06-06	2016-07-11	2016-08-09	2016-07-09	2016-10-11	2016-11-08	10	9.9	9						90	90	90	96	96	96	95	95
61691	6	1	25	1	2016-04-05	2016-05-08	2016-06-06	2016-07-11	2016-08-09	2016-07-09	2016-10-11	2016-11-08	14.9	13.2	15.2						90	90	90	96	96	96	96	96
61692	6	1	40	2	2016-04-05	2016-05-08	2016-06-06	2016-07-11	2016-08-09	2016-07-09	2016-10-11	2016-11-08	15.7	15.6	15.7	15.9	15.8	16.5	16.2	16.7	90	90	90	90	90	90	90	90
61693	6	1	29	2	2016-04-05	2016-05-08	2016-06-06	2016-07-11	2016-08-09	2016-07-09	2016-10-11	2016-11-08	14.7	14.4	15.2	14.4	14.9	15.9	14.3	14.9	90	90	90	90	90	90	90	90
61694	6	1	34	1	2016-04-05	2016-05-08	2016-06-06	2016-07-11	2016-08-09	2016-07-09	2016-10-11	2016-11-08	15.2	14.6	15.5	11.7	14.9	15.6	14.5		90	90	90	90	90	90	90	92
61695	6	1	46	2	2016-04-05	2016-05-08	2016-06-06	2016-07-11	2016-08-09	2016-07-09	2016-10-11	2016-11-08	15.6	16							90	90	91	93	93	93	93	92
61696	6	1	7	1	2016-04-05	2016-05-08	2016-06-06	2016-07-11	2016-08-09	2016-07-09	2016-10-11	2016-11-08	11	11.2	10.1	11.4	13	13.5	12.8		90	90	90	90	90	90	90	92
61697	6	1	41	1	2016-04-05	2016-05-08	2016-06-06	2016-07-11	2016-08-09	2016-07-09	2016-10-11	2016-11-08	17.7	17	17.2	17.9	17.7	18.8	18.4		90	90	90	90	90	90	90	92
61698	6	1	55	2	2016-04-05	2016-05-08	2016-06-06	2016-07-11	2016-08-09	2016-07-09	2016-10-11	2016-11-08	13.9								90	93	93	93	93	93	93	92
61699	6	1	7	2	2016-04-05	2016-05-08	2016-06-06	2016-07-11	2016-08-09	2016-07-09	2016-10-11	2016-11-08	14.6	15.1	14.5	14.6	14.7	15.5	15.3		90	90	90	90	90	90	90	92
61700	6	1	9	1	2016-04-05	2016-05-08	2016-06-06	2016-07-11	2016-08-09	2016-07-09	2016-10-11	2016-11-08	13.6	13.8	13.9	13.4	14.5	14.1	13.3	13.6	90	90	90	90	90	90	90	90
31701	3	1	43	1	2016-04-05	2016-05-08	2016-06-06	2016-07-11	2016-08-09	2016-07-09	2016-10-11	2016-11-08	14.6	14.4	15.6	13.2	15.3	15.4	16	15.9	90	90	90	90	90	90	90	90
201702	20	0	48	1	2016-04-05	2016-05-08	2016-06-06	2016-07-11	2016-08-09	2016-07-09	2016-10-11	2016-11-08	14.2	13.6	14	14.1	14.2	14.8	14.9	14.6	90	90	90	90	90	90	90	90
201703	20	0	22	2	2016-04-05	2016-05-08	2016-06-06	2016-07-11	2016-08-09	2016-07-09	2016-10-11	2016-11-08	13.4	13.2	13.5	13.7	13.6	14.9	15	15.2	90	90	90	90	90	90	90	90
201704	20	0	18	2	2016-04-05	2016-05-08	2016-06-06	2016-07-11	2016-08-09	2016-07-09	2016-10-11	2016-11-08	11.4	11.1	12		12.5				90	90	90	93	90	92	92	92
201705	20	0	8	2	2016-04-05	2016-05-08	2016-06-06	2016-07-11	2016-08-09	2016-07-09	2016-10-11	2016-11-08	12	11.5	11.1	12.3	12.4				90	90	90	90	90	92	92	92
201706	20	0	48	2	2016-04-05	2016-05-08	2016-06-06	2016-07-11	2016-08-09	2016-07-09	2016-10-11	2016-11-08	16	14.5	15.5	16.4	16.2				90	90	90	90	90	92	92	92
201707	20	0	30	1	2016-04-05	2016-05-08	2016-06-06	2016-07-11	2016-08-09	2016-07-09	2016-10-11	2016-11-08	13.7	12.5	11.7	12.8	13.5				90	90	90	90	90	92	92	92
201708	20	0	24	1	2016-04-05	2016-05-08	2016-06-06	2016-07-11	2016-08-09	2016-07-09	2016-10-11	2016-11-08	15.4	14.1	14.4	14.3	14	14.8	15	15.2	90	90	90	90	90	90	90	90
201709	20	0	42	1	2016-04-05	2016-05-08	2016-06-06	2016-07-11	2016-08-09	2016-07-09	2016-10-11	2016-11-08	13.3	14	14.6	14.4	15	15.2	14.5	15	90	90	90	90	90	90	90	90
201710	20	0	10	2	2016-04-05	2016-05-08	2016-06-06	2016-07-11	2016-08-09	2016-07-09	2016-10-11	2016-11-08	14.1	13.4	14.1	15.4	15	15.4	16		90	90	90	90	90	90	90	92
201711	20	0	53	1	2016-04-05	2016-05-08	2016-06-06	2016-07-11	2016-08-09	2016-07-09	2016-10-11	2016-11-08	16.1								90	95	95	95	95	95	95	95
201712	20	0	11	1	2016-04-05	2016-05-08	2016-06-06	2016-07-11	2016-08-09	2016-07-09	2016-10-11	2016-11-08	13.5	12.2	13.2	12.6	13.7	13.8	13.7	13.8	90	90	90	90	90	90	90	90
201713	20	0	24	1	2016-04-05	2016-05-08	2016-06-06	2016-07-11	2016-08-09	2016-07-09	2016-10-11	2016-11-08	15	14.5	14.5		16	13.5		13.7	90	90	90	93	90	90	93	90
201714	20	0	48	2	2016-04-05	2016-05-08	2016-06-06	2016-07-11	2016-08-09	2016-07-09	2016-10-11	2016-11-08	14.4	14.7	14.6		16.1	15.5	15.2	15.6	90	90	90	93	90	90	90	90
201715	20	0	18	2	2016-04-05	2016-05-08	2016-06-06	2016-07-11	2016-08-09	2016-07-09	2016-10-11	2016-11-08	12.9					13	14.5	15	90	92	93	93	93	90	90	90
201716	20	0	19	1	2016-04-05	2016-05-08	2016-06-06	2016-07-11	2016-08-09	2016-07-09	2016-10-11	2016-11-08	13.4	12.5	13.4		14				90	90	90	93	90	93	93	92
201717	20	0	24	1	2016-04-05	2016-05-08	2016-06-06	2016-07-11	2016-08-09	2016-07-09	2016-10-11	2016-11-08	13	12.5	13		13.2				90	90	90	93	90	93	93	92
201718	20	0	59	1	2016-04-05	2016-05-08	2016-06-06	2016-07-11	2016-08-09	2016-07-09	2016-10-11	2016-11-08	15.8	14.2							90	90	92	92	92	92	92	92
201719	20	0	42	2	2016-04-05	2016-05-08	2016-06-06	2016-07-11	2016-08-09	2016-07-09	2016-10-11	2016-11-08	14.3	12.4							90	90	92	92	92	92	92	92
201720	20	0	28	2	2016-04-05	2016-05-08	2016-06-06	2016-07-11	2016-08-09	2016-07-09	2016-10-11	2016-11-08	14	12.5							90	90	92	92	92	92	92	92
71721	7	1	31	1	2016-04-05	2016-05-08	2016-06-06	2016-07-11	2016-08-09	2016-07-09	2016-10-11	2016-11-08	11.6	11.3	11.3	11.3	12.4	12.5	12.8	12.3	90	90	90	90	90	90	90	90
71722	7	1	52	2	2016-04-05	2016-05-08	2016-06-06	2016-07-11	2016-08-09	2016-07-09	2016-10-11	2016-11-08	14.8	14.4	14.6	14.3	14.5	14.2	13.9	14.2	90	90	90	90	90	90	90	90
71723	7	1	23	1	2016-04-05	2016-05-08	2016-06-06	2016-07-11	2016-08-09	2016-07-09	2016-10-11	2016-11-08	13.1	13.1	13.2	13	13.4	14.1		13.9	90	90	90	90	90	90	93	90
71724	7	1	46	1	2016-04-05	2016-05-08	2016-06-06	2016-07-11	2016-08-09	2016-07-09	2016-10-11	2016-11-08	14.6	13.9	14.2	14.3	14.5	14.6		14.5	90	90	90	90	90	90	93	90
71725	7	1	19	1	2016-04-05	2016-05-08	2016-06-06	2016-07-11	2016-08-09	2016-07-09	2016-10-11	2016-11-08	14.7	13.8	14.7	15	15.1	14.5	14.3	15.7	90	90	90	90	90	90	90	90
71726	7	1	22	1	2016-04-05	2016-05-08	2016-06-06	2016-07-11	2016-08-09	2016-07-09	2016-10-11	2016-11-08	14.9	15.2	16	15.2	15.9	16.2	15.9	16.3	90	90	90	90	90	90	90	90
71727	7	1	35	1	2016-04-05	2016-05-08	2016-06-06	2016-07-11	2016-08-09	2016-07-09	2016-10-11	2016-11-08	15.6	14	14.1	14.5	15.4	15.8	14.9	15.4	90	90	90	90	90	90	90	90
71728	7	1	31	1	2016-04-05	2016-05-08	2016-06-06	2016-07-11	2016-08-09	2016-07-09	2016-10-11	2016-11-08	15	13.6	13.6	12.9	13.7	14.3	14	14.6	90	90	90	90	90	90	90	90
71729	7	1	53	1	2016-04-05	2016-05-08	2016-06-06	2016-07-11	2016-08-09	2016-07-09	2016-10-11	2016-11-08	14.8	13.2	14.4	14.4	14.4	13.8	14.2	14.6	90	90	90	90	90	90	90	90
71730	7	1	39	1	2016-04-05	2016-05-08	2016-06-06	2016-07-11	2016-08-09	2016-07-09	2016-10-11	2016-11-08	15.7	14.9	15.6	14	15.7		15.7	16.1	90	90	90	90	90	93	90	90
71731	7	1	31	2	2016-04-05	2016-05-08	2016-06-06	2016-07-11	2016-08-09	2016-07-09	2016-10-11	2016-11-08	14.6	14.6	15.4	14.3	14.4	15.2	14.2	15.9	90	90	90	90	90	90	90	90
71732	7	1	55	2	2016-04-05	2016-05-08	2016-06-06	2016-07-11	2016-08-09	2016-07-09	2016-10-11	2016-11-08	14.9	13.9	13.7	13.5	14.2	14.3	14.1	14.7	90	90	90	90	90	90	90	90
71733	7	1	34	1	2016-04-05	2016-05-08	2016-06-06	2016-07-11	2016-08-09	2016-07-09	2016-10-11	2016-11-08	14.8	14.6	15.2	14.8	14.7	15.3	15.4	16.5	90	90	90	90	90	90	90	90
71734	7	1	23	2	2016-04-05	2016-05-08	2016-06-06	2016-07-11	2016-08-09	2016-07-09	2016-10-11	2016-11-08	13.7	12.9							90	90	92	92	92	92	92	92
71735	7	1	58	1	2016-04-05	2016-05-08	2016-06-06	2016-07-11	2016-08-09	2016-07-09	2016-10-11	2016-11-08	16.4	15.9	16.2	15.9	16.7	16.3	16.3	16.5	90	90	90	90	90	90	90	90
71736	7	1	58	2	2016-04-05	2016-05-08	2016-06-06	2016-07-11	2016-08-09	2016-07-09	2016-10-11	2016-11-08	16.1	14.8	15.7	15.5	16.1	15.9	16.2	15.3	90	90	90	90	90	90	90	90
71737	7	1	58	2	2016-04-05	2016-05-08	2016-06-06	2016-07-11	2016-08-09	2016-07-09	2016-10-11	2016-11-08	15.6	14.9	15.4	15	15.7	16.1	15.6	15.6	90	90	90	90	90	90	90	90
71738	7	1	10	1	2016-04-05	2016-05-08	2016-06-06	2016-07-11	2016-08-09	2016-07-09	2016-10-11	2016-11-08	13.8	14.8	15.2	14.3	15.8	15.6	15.4		90	90	90	90	90	90	90	93
71739	7	1	34	1	2016-04-05	2016-05-08	2016-06-06	2016-07-11	2016-08-09	2016-07-09	2016-10-11	2016-11-08	16.6	16.4	16.7	16.7	17.2	17.1	16.8	17.3	90	90	90	90	90	90	90	90
71740	7	1	47	1	2016-04-05	2016-05-08	2016-06-06	2016-07-11	2016-08-09	2016-07-09	2016-10-11	2016-11-08	17.1	17.2	16.9	17.3	17.3	17.4	17.3	16.7	90	90	90	90	90	90	90	90
111741	11	0	20	1	2016-04-06	2016-05-08	2016-06-07	2016-07-12	2016-08-09	2016-09-10	2016-10-12	2016-11-09	11.1	12.4	12.9	13	13.8	14.9	14.4	14.5	90	90	90	90	90	90	90	90
111742	11	0	14	1	2016-04-06	2016-05-08	2016-06-07	2016-07-12	2016-08-09	2016-09-10	2016-10-12	2016-11-09	11.8	12.2	12.6	12.7	12.3	13.7	13	13.7	90	90	90	90	90	90	90	90
111743	11	0	36	1	2016-04-06	2016-05-08	2016-06-07	2016-07-12	2016-08-09	2016-09-10	2016-10-12	2016-11-09	14.8								90	92	92	92	92	92	92	92
111744	11	0	10	2	2016-04-06	2016-05-08	2016-06-07	2016-07-12	2016-08-09	2016-09-10	2016-10-12	2016-11-09	14.9	15.7	15.8	15	16	16.5	16.7		90	90	90	90	90	90	90	93
111745	11	0	21	1	2016-04-06	2016-05-08	2016-06-07	2016-07-12	2016-08-09	2016-09-10	2016-10-12	2016-11-09	15	15.7	15.6	16		16.6	16.2		90	90	90	90	91	90	90	93
111746	11	0	46	1	2016-04-06	2016-05-08	2016-06-07	2016-07-12	2016-08-09	2016-09-10	2016-10-12	2016-11-09	15.7	16.7	16.4	16.3		17	16.6	17	90	90	90	90	94	90	90	90
111747	11	0	26	2	2016-04-06	2016-05-08	2016-06-07	2016-07-12	2016-08-09	2016-09-10	2016-10-12	2016-11-09	12.3	12.3	11.7		12.6	13.4	13.5	14.5	90	90	90	91	90	90	90	90
111748	11	0	40	2	2016-04-06	2016-05-08	2016-06-07	2016-07-12	2016-08-09	2016-09-10	2016-10-12	2016-11-09	16	16.5	16.3			15.5	15.5	16.9	90	90	90	91	91	90	90	90
111749	11	0	11	2	2016-04-06	2016-05-08	2016-06-07	2016-07-12	2016-08-09	2016-09-10	2016-10-12	2016-11-09	12.7	13.9	13.7			13.2	13.4		90	90	90	91	92	90	90	93
111750	11	0	10	1	2016-04-06	2016-05-08	2016-06-07	2016-07-12	2016-08-09	2016-09-10	2016-10-12	2016-11-09	13								90	92	92	92	92	92	92	92
111751	11	0	43	2	2016-04-06	2016-05-08	2016-06-07	2016-07-12	2016-08-09	2016-09-10	2016-10-12	2016-11-09	14.4								90	92	92	92	92	92	92	92
111752	11	0	11	1	2016-04-06	2016-05-08	2016-06-07	2016-07-12	2016-08-09	2016-09-10	2016-10-12	2016-11-09	12.3	12.5	12.6	12.5	13	13.5	13.2	14.5	90	90	90	90	90	90	90	90
111753	11	0	43	2	2016-04-06	2016-05-08	2016-06-07	2016-07-12	2016-08-09	2016-09-10	2016-10-12	2016-11-09	14	14.4	14.6	14.5	14.6	15.5	15.1	16	90	90	90	90	90	90	90	90
111754	11	0	40	1	2016-04-06	2016-05-08	2016-06-07	2016-07-12	2016-08-09	2016-09-10	2016-10-12	2016-11-09	15.7	16	16.4	17.2	16	16.5	15.5	16	90	90	90	90	90	90	90	90
111755	11	0	52	2	2016-04-06	2016-05-08	2016-06-07	2016-07-12	2016-08-09	2016-09-10	2016-10-12	2016-11-09	17.7	18	17.8	15	18.1	18.5	18	18	90	90	90	90	90	90	90	90
111756	11	0	42	2	2016-04-06	2016-05-08	2016-06-07	2016-07-12	2016-08-09	2016-09-10	2016-10-12	2016-11-09	17	17.5	16.9		16		17	17.2	90	90	90	96	90	92	90	90
111757	11	0	33	1	2016-04-06	2016-05-08	2016-06-07	2016-07-12	2016-08-09	2016-09-10	2016-10-12	2016-11-09	14.2	14.7	14.8	14.5	14.7	15	15.1	16	90	90	90	90	90	90	90	90
111758	11	0	48	2	2016-04-06	2016-05-08	2016-06-07	2016-07-12	2016-08-09	2016-09-10	2016-10-12	2016-11-09	15	15.5	15.3	14.7	15	15.7	15.2	16.3	90	90	90	90	90	90	90	90
111759	11	0	13	2	2016-04-06	2016-05-08	2016-06-07	2016-07-12	2016-08-09	2016-09-10	2016-10-12	2016-11-09	12	12.5	12.9	12.6	12.7	13.5	12.6	12.2	90	90	90	90	90	90	90	90
111760	11	0	40	1	2016-04-06	2016-05-08	2016-06-07	2016-07-12	2016-08-09	2016-09-10	2016-10-12	2016-11-09	14.9	15.3	15.5	15.4	15.9	16.3	16.1	16.5	90	90	90	90	90	90	90	90
151761	15	0	22	1	2016-04-06	2016-05-08	2016-06-07	2016-07-12	2016-08-09	2016-09-10	2016-10-12	2016-11-09	12.7	13.2	13.7	14	13.5	13.9	13.8	14.3	90	90	90	90	90	90	90	90
151762	15	0	48	2	2016-04-06	2016-05-08	2016-06-07	2016-07-12	2016-08-09	2016-09-10	2016-10-12	2016-11-09	14.5	14	14.2	13.7	14.2	14.8	13.9	13.5	90	90	90	90	90	90	90	90
151763	15	0	27	2	2016-04-06	2016-05-08	2016-06-07	2016-07-12	2016-08-09	2016-09-10	2016-10-12	2016-11-09	16.5	15.6	16.1	16		15.5	16	16.5	90	90	90	90	91	90	90	90
151764	15	0	46	2	2016-04-06	2016-05-08	2016-06-07	2016-07-12	2016-08-09	2016-09-10	2016-10-12	2016-11-09	14.4	15	14.7	15		15	15.3	14.8	90	90	90	90	91	90	90	90
151765	15	0	13	1	2016-04-06	2016-05-08	2016-06-07	2016-07-12	2016-08-09	2016-09-10	2016-10-12	2016-11-09	14.3	14.2	15.2	15.6			15.5	15.7	90	90	90	90	91	92	90	90
151766	15	0	8	1	2016-04-06	2016-05-08	2016-06-07	2016-07-12	2016-08-09	2016-09-10	2016-10-12	2016-11-09	10.5	12.7	11.2	12					90	90	90	90	91	92	92	92
151767	15	0	36	2	2016-04-06	2016-05-08	2016-06-07	2016-07-12	2016-08-09	2016-09-10	2016-10-12	2016-11-09	14.4	13.7	13.3	14.3					90	90	90	90	91	92	92	92
151768	15	0	20	1	2016-04-06	2016-05-08	2016-06-07	2016-07-12	2016-08-09	2016-09-10	2016-10-12	2016-11-09	12.5	11.7	11.8	11.6	11.5	12.4	12		90	90	90	90	90	90	90	92
151769	15	0	39	2	2016-04-06	2016-05-08	2016-06-07	2016-07-12	2016-08-09	2016-09-10	2016-10-12	2016-11-09	14.3	14.6	14	13.4	13.3	13.6	13.3		90	90	90	90	90	90	90	92
151770	15	0	51	1	2016-04-06	2016-05-08	2016-06-07	2016-07-12	2016-08-09	2016-09-10	2016-10-12	2016-11-09	15.8	16.3	15.6	15.5		15.3	15.4	15	90	90	90	90	91	90	90	90
151771	15	0	20	1	2016-04-06	2016-05-08	2016-06-07	2016-07-12	2016-08-09	2016-09-10	2016-10-12	2016-11-09	12	11	10.6	10.9	11.3	11.4	10.2	11.4	90	90	90	90	90	90	90	90
151772	15	0	48	2	2016-04-06	2016-05-08	2016-06-07	2016-07-12	2016-08-09	2016-09-10	2016-10-12	2016-11-09	12.7	12.8	13	12.7	13	13.1	13.7	13.5	90	90	90	90	90	90	90	90
151773	15	0	36	1	2016-04-06	2016-05-08	2016-06-07	2016-07-12	2016-08-09	2016-09-10	2016-10-12	2016-11-09	12.6	12.8	13.6	13.5	13.6	13.5	13.4	13	90	90	90	90	90	90	90	90
151774	15	0	34	2	2016-04-06	2016-05-08	2016-06-07	2016-07-12	2016-08-09	2016-09-10	2016-10-12	2016-11-09	13.4	13.2	13.7	13.6		13.8	14	14.2	90	90	90	90	91	90	90	90
151775	15	0	28	1	2016-04-06	2016-05-08	2016-06-07	2016-07-12	2016-08-09	2016-09-10	2016-10-12	2016-11-09	15.8	15.4	15.1	14.9		15.9	15.7	15.6	90	90	90	90	91	90	90	90
151776	15	0	16	1	2016-04-06	2016-05-08	2016-06-07	2016-07-12	2016-08-09	2016-09-10	2016-10-12	2016-11-09	14	14.5	14.1	13.5		14	14.1	13.7	90	90	90	90	91	90	90	90
151777	15	0	9	1	2016-04-06	2016-05-08	2016-06-07	2016-07-12	2016-08-09	2016-09-10	2016-10-12	2016-11-09	13.9	12.7	12.9	13.5		13.5	14.1	13.6	90	90	90	90	91	90	90	90
151778	15	0	45	2	2016-04-06	2016-05-08	2016-06-07	2016-07-12	2016-08-09	2016-09-10	2016-10-12	2016-11-09	14.7	14	14.9	14.5		15.3	14.2	14.5	90	90	90	90	91	90	90	90
151779	15	0	17	1	2016-04-06	2016-05-08	2016-06-07	2016-07-12	2016-08-09	2016-09-10	2016-10-12	2016-11-09	11.8	12	12.2	12.3		11.5	10.8	12.4	90	90	90	90	91	90	90	90
151780	15	0	34	1	2016-04-06	2016-05-08	2016-06-07	2016-07-12	2016-08-09	2016-09-10	2016-10-12	2016-11-09	14.4	14.2	14.1	14.3	14.5	13.6	12.9	14.1	90	90	90	90	90	90	90	90
181781	18	0	34	2	2016-04-06	2016-05-08	2016-06-07	2016-07-12	2016-08-09	2016-09-10	2016-10-12	2016-11-09	14.6	14.2	14.4	14.6	14.6	14.7	14.3	14.4	90	90	90	90	90	90	90	90
181782	18	0	15	2	2016-04-06	2016-05-08	2016-06-07	2016-07-12	2016-08-09	2016-09-10	2016-10-12	2016-11-09	13	12.8	13	13.4	14	14.3	14.5	14.6	90	90	90	90	90	90	90	90
181783	18	0	9	2	2016-04-06	2016-05-08	2016-06-07	2016-07-12	2016-08-09	2016-09-10	2016-10-12	2016-11-09	12	11.9	12.3	12.7	13.1	12.6	12.5	12.8	90	90	90	90	90	90	90	90
181784	18	0	26	2	2016-04-06	2016-05-08	2016-06-07	2016-07-12	2016-08-09	2016-09-10	2016-10-12	2016-11-09	14.5	14.3	14	14.2	14.4	14.8	14.6	14.2	90	90	90	90	90	90	90	90
181785	18	0	52	2	2016-04-06	2016-05-08	2016-06-07	2016-07-12	2016-08-09	2016-09-10	2016-10-12	2016-11-09	16.4	15.8	15.9	16.4	16.3	16.4	16.2	16.3	90	90	90	90	90	90	90	90
181786	18	0	8	2	2016-04-06	2016-05-08	2016-06-07	2016-07-12	2016-08-09	2016-09-10	2016-10-12	2016-11-09	13.4	13.2	13.4	13.3	13.1	13.2	12.9	12.8	90	90	90	90	90	90	90	90
181787	18	0	27	1	2016-04-06	2016-05-08	2016-06-07	2016-07-12	2016-08-09	2016-09-10	2016-10-12	2016-11-09	12.7	13.2	13.5	14	14.4	14.8	15.2	15.6	90	90	90	90	90	90	90	90
181788	18	0	6	1	2016-04-06	2016-05-08	2016-06-07	2016-07-12	2016-08-09	2016-09-10	2016-10-12	2016-11-09	14.5	14.2	14.1	14.4	14	13.8	13.9	14.5	90	90	90	90	90	90	90	90
181789	18	0	54	1	2016-04-06	2016-05-08	2016-06-07	2016-07-12	2016-08-09	2016-09-10	2016-10-12	2016-11-09	16.4	15.9	16.2	16.5	16.4	16.1	16.2	16.5	90	90	90	90	90	90	90	90
181790	18	0	27	2	2016-04-06	2016-05-08	2016-06-07	2016-07-12	2016-08-09	2016-09-10	2016-10-12	2016-11-09	15.6		15.3	15.5			15	15.9	90	91	90	90	91	91	90	90
181791	18	0	50	1	2016-04-06	2016-05-08	2016-06-07	2016-07-12	2016-08-09	2016-09-10	2016-10-12	2016-11-09	16.3		16.1	16.2			15.8	16.1	90	91	90	90	91	91	90	90
181792	18	0	56	2	2016-04-06	2016-05-08	2016-06-07	2016-07-12	2016-08-09	2016-09-10	2016-10-12	2016-11-09	15.6	14.5	14.7	14.8	15	14.9	14.8	14.4	90	90	90	90	90	90	90	90
181793	18	0	39	2	2016-04-06	2016-05-08	2016-06-07	2016-07-12	2016-08-09	2016-09-10	2016-10-12	2016-11-09	14.3		13.8	13.7	14.4	14.6	14.5	14.2	90	94	90	90	90	90	90	90
181794	18	0	9	2	2016-04-06	2016-05-08	2016-06-07	2016-07-12	2016-08-09	2016-09-10	2016-10-12	2016-11-09	13.7	13.9	14.4	14.9	15	15.2	15.8	15.5	90	90	90	90	90	90	90	90
181795	18	0	29	2	2016-04-06	2016-05-08	2016-06-07	2016-07-12	2016-08-09	2016-09-10	2016-10-12	2016-11-09	13.8				14.3	14.4	14.5	14.8	90	91	93	93	90	90	90	90
181796	18	0	34	1	2016-04-06	2016-05-08	2016-06-07	2016-07-12	2016-08-09	2016-09-10	2016-10-12	2016-11-09	14.8	14.6	15.4		15.5	15.4	16	16.2	90	90	90	91	90	90	90	90
181797	18	0	56	1	2016-04-06	2016-05-08	2016-06-07	2016-07-12	2016-08-09	2016-09-10	2016-10-12	2016-11-09	17								90	96	92	92	92	92	92	92
181798	18	0	35	2	2016-04-06	2016-05-08	2016-06-07	2016-07-12	2016-08-09	2016-09-10	2016-10-12	2016-11-09	16.3			15					90	96	92	90	92	92	92	92
181799	18	0	8	2	2016-04-06	2016-05-08	2016-06-07	2016-07-12	2016-08-09	2016-09-10	2016-10-12	2016-11-09	12.4	13.3	13.5	13.8	14.4				90	90	90	90	90	93	93	94
181800	18	0	13	1	2016-04-06	2016-05-08	2016-06-07	2016-07-12	2016-08-09	2016-09-10	2016-10-12	2016-11-09	13.3	13.4	12.8	12.9	13	13.3	13.9	14.2	90	90	90	90	90	90	90	90
61801	6	1	27	2	2016-04-06	2016-05-08	2016-06-07	2016-07-12	2016-08-09	2016-09-10	2016-10-12	2016-11-09	14.9	13.8	14.6	13.1	13.2	14.2	15	14.3	90	90	90	90	90	90	90	90
61802	6	1	40	2	2016-04-06	2016-05-08	2016-06-07	2016-07-12	2016-08-09	2016-09-10	2016-10-12	2016-11-09	14.4	13.4	13.3	13.6	14	15	14.7	15	90	90	90	90	90	90	90	90
61803	6	1	52	1	2016-04-06	2016-05-08	2016-06-07	2016-07-12	2016-08-09	2016-09-10	2016-10-12	2016-11-09	14.6	14.7	14.4	14.8		15.1	15.4	15	90	90	90	90	91	90	90	90
61804	6	1	39	2	2016-04-06	2016-05-08	2016-06-07	2016-07-12	2016-08-09	2016-09-10	2016-10-12	2016-11-09	14.1	15.5	14.9	14.7	15.7	15.8	16.1	16.3	90	90	90	90	90	90	90	90
61805	6	1	41	1	2016-04-06	2016-05-08	2016-06-07	2016-07-12	2016-08-09	2016-09-10	2016-10-12	2016-11-09	14	12.6	13.8	13.6	13.7		14.7	14.5	90	90	90	90	90	93	90	90
61806	6	1	52	2	2016-04-06	2016-05-08	2016-06-07	2016-07-12	2016-08-09	2016-09-10	2016-10-12	2016-11-09	13.9	14.6	14.2	14.3			14.1	14.4	90	90	90	90	93	93	90	90
61807	6	1	17	1	2016-04-06	2016-05-08	2016-06-07	2016-07-12	2016-08-09	2016-09-10	2016-10-12	2016-11-09	14.6	14.1	12.7	12.7		13.5	13.1		90	90	90	90	91	90	90	91
61808	6	1	32	2	2016-04-06	2016-05-08	2016-06-07	2016-07-12	2016-08-09	2016-09-10	2016-10-12	2016-11-09	12.8	13.8	13.6	12.9					90	90	90	90	91	95	95	95
61809	6	1	15	2	2016-04-06	2016-05-08	2016-06-07	2016-07-12	2016-08-09	2016-09-10	2016-10-12	2016-11-09	11.3	11	11.7	11.8					90	90	90	90	91	95	95	95
61810	6	1	39	1	2016-04-06	2016-05-08	2016-06-07	2016-07-12	2016-08-09	2016-09-10	2016-10-12	2016-11-09	12.3	12.2	12.1	13.1	13.6				90	90	90	90	90	95	95	95
61811	6	1	9	1	2016-04-06	2016-05-08	2016-06-07	2016-07-12	2016-08-09	2016-09-10	2016-10-12	2016-11-09	13.2	13.2	13.6	12.5	13.2	12.5	11.9	12.1	90	90	90	90	90	90	90	90
61812	6	1	20	1	2016-04-06	2016-05-08	2016-06-07	2016-07-12	2016-08-09	2016-09-10	2016-10-12	2016-11-09	12	11.5	11.7	11.9	12.2	12.3	12	12.4	90	90	90	90	90	90	90	90
61813	6	1	21	1	2016-04-06	2016-05-08	2016-06-07	2016-07-12	2016-08-09	2016-09-10	2016-10-12	2016-11-09	15.7	15.5	16.1	15.4	15.3	16.2	14.7	15.4	90	90	90	90	90	90	90	90
61814	6	1	20	1	2016-04-06	2016-05-08	2016-06-07	2016-07-12	2016-08-09	2016-09-10	2016-10-12	2016-11-09	13.9	12.8	12.8	12.6	13.8	13.5	13.7	13.8	90	90	90	90	90	90	90	90
61815	6	1	52	2	2016-04-06	2016-05-08	2016-06-07	2016-07-12	2016-08-09	2016-09-10	2016-10-12	2016-11-09	14.8	14.7	14.8	14.2		14.6	14.3	14.2	90	90	90	90	91	90	90	90
61816	6	1	56	1	2016-04-06	2016-05-08	2016-06-07	2016-07-12	2016-08-09	2016-09-10	2016-10-12	2016-11-09	14.5	15.1	14.9	14.6	14.7	15.1	15	15	90	90	90	90	90	90	90	90
61817	6	1	50	2	2016-04-06	2016-05-08	2016-06-07	2016-07-12	2016-08-09	2016-09-10	2016-10-12	2016-11-09	14.7	15.4		15.5	12.3		14.6	13.4	90	90	91	90	90	93	90	90
61818	6	1	7	2	2016-04-06	2016-05-08	2016-06-07	2016-07-12	2016-08-09	2016-09-10	2016-10-12	2016-11-09	11.4	12.2	13.3	13.4	13.1	12.6	12.5		90	90	90	90	90	90	90	92
61819	6	1	41	2	2016-04-06	2016-05-08	2016-06-07	2016-07-12	2016-08-09	2016-09-10	2016-10-12	2016-11-09	14.8	14.7	15.4	15.8	15.7		15.1		90	90	90	90	90	93	90	91
61820	6	1	39	1	2016-04-06	2016-05-08	2016-06-07	2016-07-12	2016-08-09	2016-09-10	2016-10-12	2016-11-09	14.4	15.4	14	15.5		15.4	15.1	15.2	90	90	90	90	93	90	90	90
201821	20	0	36	2	2016-04-06	2016-05-08	2016-06-07	2016-07-12	2016-08-09	2016-09-10	2016-10-12	2016-11-09	12.1	11.8	12.3	13	13.2				90	90	90	90	90	92	92	92
201822	20	0	13	2	2016-04-06	2016-05-08	2016-06-07	2016-07-12	2016-08-09	2016-09-10	2016-10-12	2016-11-09	10.5	10.3	10.7		12.5				90	90	90	93	90	92	92	92
201823	20	0	25	1	2016-04-06	2016-05-08	2016-06-07	2016-07-12	2016-08-09	2016-09-10	2016-10-12	2016-11-09	12.5	11.5	12.4	13	13				90	90	90	90	90	92	92	92
201824	20	0	36	1	2016-04-06	2016-05-08	2016-06-07	2016-07-12	2016-08-09	2016-09-10	2016-10-12	2016-11-09	16.1	15.5	15.6						90	90	90	92	92	92	92	92
201825	20	0	15	2	2016-04-06	2016-05-08	2016-06-07	2016-07-12	2016-08-09	2016-09-10	2016-10-12	2016-11-09	11.5	11.6	12.2						90	90	90	92	92	92	92	92
201826	20	0	7	1	2016-04-06	2016-05-08	2016-06-07	2016-07-12	2016-08-09	2016-09-10	2016-10-12	2016-11-09	11.7		10	11.5	13.2	12.3		12.5	90	92	90	90	90	90	93	90
201827	20	0	28	2	2016-04-06	2016-05-08	2016-06-07	2016-07-12	2016-08-09	2016-09-10	2016-10-12	2016-11-09	14.5	14.1	14	14.5	15.1	15	15.7	14.7	90	90	90	90	90	90	90	90
201828	20	0	59	2	2016-04-06	2016-05-08	2016-06-07	2016-07-12	2016-08-09	2016-09-10	2016-10-12	2016-11-09	15.5	15.1	15.4	15.6	15.7	16	15.5	16.2	90	90	90	90	90	90	90	90
201829	20	0	52	1	2016-04-06	2016-05-08	2016-06-07	2016-07-12	2016-08-09	2016-09-10	2016-10-12	2016-11-09	15.6								90	93	93	93	93	92	92	92
201830	20	0	48	1	2016-04-06	2016-05-08	2016-06-07	2016-07-12	2016-08-09	2016-09-10	2016-10-12	2016-11-09	13.5	12.9	13.5	13.8	13.9	14	15	14.8	90	90	90	90	90	90	90	90
201831	20	0	30	2	2016-04-06	2016-05-08	2016-06-07	2016-07-12	2016-08-09	2016-09-10	2016-10-12	2016-11-09	13.1	12.5	13.7	13.2	13.1	13.5	14.1	14.2	90	90	90	90	90	90	90	90
201832	20	0	18	2	2016-04-06	2016-05-08	2016-06-07	2016-07-12	2016-08-09	2016-09-10	2016-10-12	2016-11-09	12.4	12.8	13.1	13.5	14	13.9	13.7	13.9	90	90	90	90	90	90	90	90
201833	20	0	30	1	2016-04-06	2016-05-08	2016-06-07	2016-07-12	2016-08-09	2016-09-10	2016-10-12	2016-11-09	12.5	12.5	10.7	11.5	13.5	12.5	12		90	90	90	90	90	90	90	93
201834	20	0	42	1	2016-04-06	2016-05-08	2016-06-07	2016-07-12	2016-08-09	2016-09-10	2016-10-12	2016-11-09	14.3	14.3	14.5	14.8	14.9	14.7	14.5	14.9	90	90	90	90	90	90	90	90
201835	20	0	54	1	2016-04-06	2016-05-08	2016-06-07	2016-07-12	2016-08-09	2016-09-10	2016-10-12	2016-11-09	14.1	14.4	14.3	14.7	15	14.1	14.2	14.5	90	90	90	90	90	90	90	90
201836	20	0	23	1	2016-04-06	2016-05-08	2016-06-07	2016-07-12	2016-08-09	2016-09-10	2016-10-12	2016-11-09	14.4	14.1	15	14.8	14	15.1	15.5	14.5	90	90	90	90	90	90	90	90
201837	20	0	24	2	2016-04-06	2016-05-08	2016-06-07	2016-07-12	2016-08-09	2016-09-10	2016-10-12	2016-11-09	13.5	13.3	13.4	13.2	13.1	13	13.2		90	90	90	90	90	90	90	92
201838	20	0	40	1	2016-04-06	2016-05-08	2016-06-07	2016-07-12	2016-08-09	2016-09-10	2016-10-12	2016-11-09	13.1	13.2	13.5	14	14.5	14.6	15	15.7	90	90	90	90	90	90	90	90
201839	20	0	35	1	2016-04-06	2016-05-08	2016-06-07	2016-07-12	2016-08-09	2016-09-10	2016-10-12	2016-11-09	13.5	13.7	13.5		13.6	14.2	15.2	15	90	90	90	93	90	90	90	90
201840	20	0	9	2	2016-04-06	2016-05-08	2016-06-07	2016-07-12	2016-08-09	2016-09-10	2016-10-12	2016-11-09	13.1	12	12.3	14.1	14.5				90	90	90	90	90	93	93	93
71841	7	1	22	2	2016-04-06	2016-05-08	2016-06-07	2016-07-12	2016-08-09	2016-09-10	2016-10-12	2016-11-09	14.3	14.4	14.3	14.7	14.3	15.2	15.6	15.7	90	90	90	90	90	90	90	90
71842	7	1	36	1	2016-04-06	2016-05-08	2016-06-07	2016-07-12	2016-08-09	2016-09-10	2016-10-12	2016-11-09	16.1	15.4	15.4	15.5	15.5	16.1	15.7	14.9	90	90	90	90	90	90	90	90
71843	7	1	13	1	2016-04-06	2016-05-08	2016-06-07	2016-07-12	2016-08-09	2016-09-10	2016-10-12	2016-11-09	13.2	13.2	13.4	13.6	13.4	13.6	12.6	13.3	90	90	90	90	90	90	90	90
71844	7	1	16	2	2016-04-06	2016-05-08	2016-06-07	2016-07-12	2016-08-09	2016-09-10	2016-10-12	2016-11-09	14.1	13.6	13.4	14.3	14.7	14.4	14.6	14.7	90	90	90	90	90	90	90	90
71845	7	1	51	2	2016-04-06	2016-05-08	2016-06-07	2016-07-12	2016-08-09	2016-09-10	2016-10-12	2016-11-09	15.2	13.9	14.2	14.3	14.2	15.1	14.1	13.9	90	90	90	90	90	90	90	90
71846	7	1	56	2	2016-04-06	2016-05-08	2016-06-07	2016-07-12	2016-08-09	2016-09-10	2016-10-12	2016-11-09	15.8	14.7	14.9	14.1		14.9	14.8	14.7	90	90	90	90	91	90	90	90
71847	7	1	23	2	2016-04-06	2016-05-08	2016-06-07	2016-07-12	2016-08-09	2016-09-10	2016-10-12	2016-11-09	12.4	12.9	13.2	13.2	14.2	13.7	13.8	14.1	90	90	90	90	90	90	90	90
71848	7	1	33	1	2016-04-06	2016-05-08	2016-06-07	2016-07-12	2016-08-09	2016-09-10	2016-10-12	2016-11-09	14.9	14.2	14.8	15		15.3	14.4	14.9	90	90	90	90	91	90	90	90
71849	7	1	8	2	2016-04-06	2016-05-08	2016-06-07	2016-07-12	2016-08-09	2016-09-10	2016-10-12	2016-11-09	12.7	12.9	13.4	12.7	12.4	13.1	13		90	90	90	90	90	90	90	93
71850	7	1	26	2	2016-04-06	2016-05-08	2016-06-07	2016-07-12	2016-08-09	2016-09-10	2016-10-12	2016-11-09	14.7	14.6	14.8	14.9	14.4	14.2	14.4	14.2	90	90	90	90	90	90	90	90
71851	7	1	52	2	2016-04-06	2016-05-08	2016-06-07	2016-07-12	2016-08-09	2016-09-10	2016-10-12	2016-11-09	15.2	14.6	14.7	15.4	15.7	14.4	14.6	14.1	90	90	90	90	90	90	90	90
71852	7	1	44	1	2016-04-06	2016-05-08	2016-06-07	2016-07-12	2016-08-09	2016-09-10	2016-10-12	2016-11-09	14.9	14.8	14.4	15.4	15.3	15.4	15.1	14.6	90	90	90	90	90	90	90	90
71853	7	1	14	2	2016-04-06	2016-05-08	2016-06-07	2016-07-12	2016-08-09	2016-09-10	2016-10-12	2016-11-09	13.9	13.4	14.1	14.4	14.6	14.1	14.4	14.6	90	90	90	90	90	90	90	90
71854	7	1	39	1	2016-04-06	2016-05-08	2016-06-07	2016-07-12	2016-08-09	2016-09-10	2016-10-12	2016-11-09	15.4	15.6	15.8	16.9	15.7	15.6	15.6	13.6	90	90	90	90	90	90	90	90
71855	7	1	19	1	2016-04-06	2016-05-08	2016-06-07	2016-07-12	2016-08-09	2016-09-10	2016-10-12	2016-11-09	15.2	15.5	15.7	15.9	16.2		16.3	17.2	90	90	90	90	90	93	90	90
71856	7	1	34	2	2016-04-06	2016-05-08	2016-06-07	2016-07-12	2016-08-09	2016-09-10	2016-10-12	2016-11-09	14.9	14.6	14.9	15.2	15.4	15.9	16.2	16.3	90	90	90	90	90	90	90	90
71857	7	1	35	2	2016-04-06	2016-05-08	2016-06-07	2016-07-12	2016-08-09	2016-09-10	2016-10-12	2016-11-09	14.8	14.3	14.6	15	14.8	15.4	15.4	15.2	90	90	90	90	90	90	90	90
71858	7	1	22	1	2016-04-06	2016-05-08	2016-06-07	2016-07-12	2016-08-09	2016-09-10	2016-10-12	2016-11-09	13.2	13.1	12.9	13.2	14.7	13.9	14.6	14.6	90	90	90	90	90	90	90	90
71859	7	1	23	1	2016-04-06	2016-05-08	2016-06-07	2016-07-12	2016-08-09	2016-09-10	2016-10-12	2016-11-09	14.3	13.6	14.2	14.2	14.3	15.1	14.7	14.6	90	90	90	90	90	90	90	90
71860	7	1	46	1	2016-04-06	2016-05-08	2016-06-07	2016-07-12	2016-08-09	2016-09-10	2016-10-12	2016-11-09	15.6	14.7	15.4	15.6	15.7	15.6	14.6	14.2	90	90	90	90	90	90	90	90
161861	16	0	49	1	2016-04-09	2016-05-09	2016-06-08	2016-07-12	2016-08-10	2016-09-11	2016-10-15	2016-11-12	14.6	14.4		14.5	14.6	15	15.2		90	90	91	90	90	90	90	96
161862	16	0	52	1	2016-04-09	2016-05-09	2016-06-08	2016-07-12	2016-08-10	2016-09-11	2016-10-15	2016-11-12	15.8	16	16.2	15.7	16.5	16.9	17	16.2	90	90	90	90	90	90	90	90
161863	16	0	40	2	2016-04-09	2016-05-09	2016-06-08	2016-07-12	2016-08-10	2016-09-11	2016-10-15	2016-11-12	13.9	14.7	13.8	14	14.4	14.6	14.9	14.4	90	90	90	90	90	90	90	90
161864	16	0	8	2	2016-04-09	2016-05-09	2016-06-08	2016-07-12	2016-08-10	2016-09-11	2016-10-15	2016-11-12	10.5	11.8	11.1	11.4	10.9	11.9	12.3	12.4	90	90	90	90	90	90	90	90
161865	16	0	38	1	2016-04-09	2016-05-09	2016-06-08	2016-07-12	2016-08-10	2016-09-11	2016-10-15	2016-11-12	13.9	14.1	13.7	14	13.7	14	14.3	14.4	90	90	90	90	90	90	90	90
161866	16	0	11	1	2016-04-09	2016-05-09	2016-06-08	2016-07-12	2016-08-10	2016-09-11	2016-10-15	2016-11-12	12.7	12.6	12.8	12.6	13	13.4	13.7	14.2	90	90	90	90	90	90	90	90
161867	16	0	47	2	2016-04-09	2016-05-09	2016-06-08	2016-07-12	2016-08-10	2016-09-11	2016-10-15	2016-11-12	14	15.5	14.8	14.5	14.6	14.9	15	15.2	90	90	90	90	90	90	90	90
161868	16	0	13	1	2016-04-09	2016-05-09	2016-06-08	2016-07-12	2016-08-10	2016-09-11	2016-10-15	2016-11-12	13.4	13.5	13.7	14	14.1	14.3	14.5	14.4	90	90	90	90	90	90	90	90
161869	16	0	29	2	2016-04-09	2016-05-09	2016-06-08	2016-07-12	2016-08-10	2016-09-11	2016-10-15	2016-11-12	12	12.3	12	12.1	12.7	13.1	13.5	13.4	90	90	90	90	90	90	90	90
161870	16	0	27	2	2016-04-09	2016-05-09	2016-06-08	2016-07-12	2016-08-10	2016-09-11	2016-10-15	2016-11-12	11.9	13	12.3	13	13.2	12.5	12.7	13.6	90	90	90	90	90	90	90	90
161871	16	0	51	2	2016-04-09	2016-05-09	2016-06-08	2016-07-12	2016-08-10	2016-09-11	2016-10-15	2016-11-12	14.8	15.6	15.2	16	15.6	15	15.2	15.3	90	90	90	90	90	90	90	90
161872	16	0	21	2	2016-04-09	2016-05-09	2016-06-08	2016-07-12	2016-08-10	2016-09-11	2016-10-15	2016-11-12	13.2	14.5	14.7	14.5	15	14.8	15	14.9	90	90	90	90	90	90	90	90
161873	16	0	43	1	2016-04-09	2016-05-09	2016-06-08	2016-07-12	2016-08-10	2016-09-11	2016-10-15	2016-11-12	14	15	14.8	14.9			15	15.5	90	90	90	90	91	92	90	90
161874	16	0	45	2	2016-04-09	2016-05-09	2016-06-08	2016-07-12	2016-08-10	2016-09-11	2016-10-15	2016-11-12	17	17.9	17.5	16.5	17	17.4	17.6	17.5	90	90	90	90	90	90	90	90
161875	16	0	42	2	2016-04-09	2016-05-09	2016-06-08	2016-07-12	2016-08-10	2016-09-11	2016-10-15	2016-11-12	15	15.5	15.6	15.4	16	16	16.1	15.8	90	90	90	90	90	90	90	90
161876	16	0	20	1	2016-04-09	2016-05-09	2016-06-08	2016-07-12	2016-08-10	2016-09-11	2016-10-15	2016-11-12	12.2	12.1	12.3	13	13.5	14.4	14.7	13	90	90	90	90	90	90	90	90
161877	16	0	55	2	2016-04-09	2016-05-09	2016-06-08	2016-07-12	2016-08-10	2016-09-11	2016-10-15	2016-11-12	14.2	15.2	15	15.1	15.4	15.5	15.7	15.9	90	90	90	90	90	90	90	90
161878	16	0	40	2	2016-04-09	2016-05-09	2016-06-08	2016-07-12	2016-08-10	2016-09-11	2016-10-15	2016-11-12	13.7	14	14.2	13.8	15.6	14.5	14.8	14.7	90	90	90	90	90	90	90	90
161879	16	0	13	1	2016-04-09	2016-05-09	2016-06-08	2016-07-12	2016-08-10	2016-09-11	2016-10-15	2016-11-12	10.9	11.5	11.5	11.2	10				90	90	90	90	90	95	95	95
161880	16	0	9	2	2016-04-09	2016-05-09	2016-06-08	2016-07-12	2016-08-10	2016-09-11	2016-10-15	2016-11-12	12.8	13	12.8						90	90	90	92	92	92	92	92
151881	15	0	18	2	2016-04-09	2016-05-09	2016-06-08	2016-07-12	2016-08-10	2016-09-11	2016-10-15	2016-11-12	13.6	12.9	13.5		13.6	13.5	13.6	13.7	90	90	90	91	90	90	90	90
151882	15	0	49	1	2016-04-09	2016-05-09	2016-06-08	2016-07-12	2016-08-10	2016-09-11	2016-10-15	2016-11-12	16.5	15.6	15.8	16.2	16.4	16.4	16.3	16	90	90	90	90	90	90	90	90
151883	15	0	27	1	2016-04-09	2016-05-09	2016-06-08	2016-07-12	2016-08-10	2016-09-11	2016-10-15	2016-11-12	15.3	14	14.9	14.1		14.2	14.5	14.4	90	90	90	90	91	90	90	90
151884	15	0	42	2	2016-04-09	2016-05-09	2016-06-08	2016-07-12	2016-08-10	2016-09-11	2016-10-15	2016-11-12	16.5	15.6	15.7	15.5		16	15.3	15	90	90	90	90	91	90	90	90
151885	15	0	14	1	2016-04-09	2016-05-09	2016-06-08	2016-07-12	2016-08-10	2016-09-11	2016-10-15	2016-11-12	13.2	13.5	13	13.2		13.5	13.5	14.3	90	90	90	90	91	90	90	90
151886	15	0	32	2	2016-04-09	2016-05-09	2016-06-08	2016-07-12	2016-08-10	2016-09-11	2016-10-15	2016-11-12	14.1	14.2	14	14.3	14	14.4	14.4	14.1	90	90	90	90	90	90	90	90
151887	15	0	30	2	2016-04-09	2016-05-09	2016-06-08	2016-07-12	2016-08-10	2016-09-11	2016-10-15	2016-11-12	13.4	12.1	13.8	14	14.4	13.8	13.1	12.9	90	90	90	90	90	90	90	90
151888	15	0	31	2	2016-04-09	2016-05-09	2016-06-08	2016-07-12	2016-08-10	2016-09-11	2016-10-15	2016-11-12	13.6	12.7	12.8	12.3	13.3	13	13.2	13.1	90	90	90	90	90	90	90	90
151889	15	0	19	1	2016-04-09	2016-05-09	2016-06-08	2016-07-12	2016-08-10	2016-09-11	2016-10-15	2016-11-12	11.5	11	11.2	11.6	11.8	12.8	11.4	12.2	90	90	90	90	90	90	90	90
151890	15	0	52	2	2016-04-09	2016-05-09	2016-06-08	2016-07-12	2016-08-10	2016-09-11	2016-10-15	2016-11-12	15.3	15.4	15.4	15.4	15.7	13.5	14	14.8	90	90	90	90	90	90	90	90
151891	15	0	36	1	2016-04-09	2016-05-09	2016-06-08	2016-07-12	2016-08-10	2016-09-11	2016-10-15	2016-11-12	15.5	15	15.1	14.6	14.9	14.9	15.1	15.4	90	90	90	90	90	90	90	90
151892	15	0	22	2	2016-04-09	2016-05-09	2016-06-08	2016-07-12	2016-08-10	2016-09-11	2016-10-15	2016-11-12	14.5	15.2	13.2	13.9	13.8	14.8	14.5	14.2	90	90	90	90	90	90	90	90
151893	15	0	21	2	2016-04-09	2016-05-09	2016-06-08	2016-07-12	2016-08-10	2016-09-11	2016-10-15	2016-11-12	14.9	15	15.2	14.6	14.1	14	14.3	14.5	90	90	90	90	90	90	90	90
151894	15	0	48	1	2016-04-09	2016-05-09	2016-06-08	2016-07-12	2016-08-10	2016-09-11	2016-10-15	2016-11-12	14.4	14.2	14.9	14.7	14.3	14.1	14.2	14.4	90	90	90	90	90	90	90	90
151895	15	0	18	1	2016-04-09	2016-05-09	2016-06-08	2016-07-12	2016-08-10	2016-09-11	2016-10-15	2016-11-12	13	13.7	13.6	13.4	13.5	13.9	13.3	13.5	90	90	90	90	90	90	90	90
151896	15	0	36	1	2016-04-09	2016-05-09	2016-06-08	2016-07-12	2016-08-10	2016-09-11	2016-10-15	2016-11-12	14	13.2	14	14.4	13.8	13.5	13.5	13.4	90	90	90	90	90	90	90	90
151897	15	0	9	2	2016-04-09	2016-05-09	2016-06-08	2016-07-12	2016-08-10	2016-09-11	2016-10-15	2016-11-12	12	12.3	13.3	13		13	13.1	13.5	90	90	90	90	91	90	90	90
151898	15	0	30	2	2016-04-09	2016-05-09	2016-06-08	2016-07-12	2016-08-10	2016-09-11	2016-10-15	2016-11-12	14.8	14	14.2	14.3	14.8	14.6	15.4	14.9	90	90	90	90	90	90	90	90
151899	15	0	46	1	2016-04-09	2016-05-09	2016-06-08	2016-07-12	2016-08-10	2016-09-11	2016-10-15	2016-11-12	13.9	13.6	13.4	13.5	13.6	13.5	14	14.3	90	90	90	90	90	90	90	90
151900	15	0	31	2	2016-04-09	2016-05-09	2016-06-08	2016-07-12	2016-08-10	2016-09-11	2016-10-15	2016-11-12	14.5								90	92	92	92	92	92	92	92
181901	18	0	36	2	2016-04-09	2016-05-09	2016-06-08	2016-07-12	2016-08-10	2016-09-11	2016-10-15	2016-11-12	16.5	16.1	16.4			17	16.7	16.8	90	90	90	93	93	90	90	90
181902	18	0	52	2	2016-04-09	2016-05-09	2016-06-08	2016-07-12	2016-08-10	2016-09-11	2016-10-15	2016-11-12	15.5	15.9	15.7	15.5	15.9	16	15.7	14.9	90	90	90	90	90	90	90	90
181903	18	0	20	1	2016-04-09	2016-05-09	2016-06-08	2016-07-12	2016-08-10	2016-09-11	2016-10-15	2016-11-12	13.6	13.4	13.7	14	14.4	14.3	14	14.2	90	90	90	90	90	90	90	90
181904	18	0	37	2	2016-04-09	2016-05-09	2016-06-08	2016-07-12	2016-08-10	2016-09-11	2016-10-15	2016-11-12	15.6	15.5	15.4	15	15.6	15.8	15.5	15	90	90	90	90	90	90	90	90
181905	18	0	56	2	2016-04-09	2016-05-09	2016-06-08	2016-07-12	2016-08-10	2016-09-11	2016-10-15	2016-11-12	17.6	17.7	17.4	17.3	17.5	17.7	17.5	17.7	90	90	90	90	90	90	90	90
181906	18	0	33	2	2016-04-09	2016-05-09	2016-06-08	2016-07-12	2016-08-10	2016-09-11	2016-10-15	2016-11-12	16.1	16.3					16.5	15.8	90	90	93	93	93	93	90	90
181907	18	0	54	2	2016-04-09	2016-05-09	2016-06-08	2016-07-12	2016-08-10	2016-09-11	2016-10-15	2016-11-12	18.1	17.5	17.5	17	17.2	17.5	17.6	16.9	90	90	90	90	90	90	90	90
181908	18	0	8	1	2016-04-09	2016-05-09	2016-06-08	2016-07-12	2016-08-10	2016-09-11	2016-10-15	2016-11-12	12.5	12.9	11.7		13.3	13.6	14	14.4	90	90	90	93	90	90	90	90
181909	18	0	14	2	2016-04-09	2016-05-09	2016-06-08	2016-07-12	2016-08-10	2016-09-11	2016-10-15	2016-11-12	13.9	13.8	13.7	13.5	13.5	13.6	14	14.6	90	90	90	90	90	90	90	90
181910	18	0	26	1	2016-04-09	2016-05-09	2016-06-08	2016-07-12	2016-08-10	2016-09-11	2016-10-15	2016-11-12	14.9	14.6	15.2	15.5	14.9	15.3	15.8	15.4	90	90	90	90	90	90	90	90
181911	18	0	39	1	2016-04-09	2016-05-09	2016-06-08	2016-07-12	2016-08-10	2016-09-11	2016-10-15	2016-11-12	14.2	14.4	14.7	14.5	14.5	14.7	15.2	15	90	90	90	90	90	90	90	90
181912	18	0	20	1	2016-04-09	2016-05-09	2016-06-08	2016-07-12	2016-08-10	2016-09-11	2016-10-15	2016-11-12	15	14.7	15	15.1			14.5	15.1	90	90	90	90	91	91	90	90
181913	18	0	40	2	2016-04-09	2016-05-09	2016-06-08	2016-07-12	2016-08-10	2016-09-11	2016-10-15	2016-11-12	16.8	16.5	16.9	16.5	16.4		16.6	17.1	90	90	90	90	90	91	90	90
181914	18	0	46	1	2016-04-09	2016-05-09	2016-06-08	2016-07-12	2016-08-10	2016-09-11	2016-10-15	2016-11-12	15.6	15.4	15.6	15.4		15.3	15	15.3	90	90	90	90	93	90	90	90
181915	18	0	8	1	2016-04-09	2016-05-09	2016-06-08	2016-07-12	2016-08-10	2016-09-11	2016-10-15	2016-11-12	14.4	14.2	13.3		14.5	14.4			90	90	90	93	90	90	93	93
181916	18	0	35	1	2016-04-09	2016-05-09	2016-06-08	2016-07-12	2016-08-10	2016-09-11	2016-10-15	2016-11-12	14.4	14.2	14.5						90	90	90	94	93	93	93	93
181917	18	0	50	2	2016-04-09	2016-05-09	2016-06-08	2016-07-12	2016-08-10	2016-09-11	2016-10-15	2016-11-12	14.5	14.3	14.2	13.8	14		13.5		90	90	90	90	90	93	90	93
181918	18	0	44	1	2016-04-09	2016-05-09	2016-06-08	2016-07-12	2016-08-10	2016-09-11	2016-10-15	2016-11-12	17.2	16.9	17.2	17	16.5	16.9	17	16.6	90	90	90	90	90	90	90	90
181919	18	0	36	1	2016-04-09	2016-05-09	2016-06-08	2016-07-12	2016-08-10	2016-09-11	2016-10-15	2016-11-12	16.4	16		16.4	16.1	16.3	16.4		90	90	93	90	90	90	90	93
181920	18	0	34	2	2016-04-09	2016-05-09	2016-06-08	2016-07-12	2016-08-10	2016-09-11	2016-10-15	2016-11-12	16.3	16.4	16.7	16.5	16.1	13.5	14.6	15.3	90	90	90	90	90	90	90	90
201921	20	0	20	1	2016-04-09	2016-05-09	2016-06-08	2016-07-12	2016-08-10	2016-09-11	2016-10-15	2016-11-12	14.6	14	14.5		14.9	15.1	15.5	15.6	90	90	90	93	90	90	90	90
201922	20	0	54	2	2016-04-09	2016-05-09	2016-06-08	2016-07-12	2016-08-10	2016-09-11	2016-10-15	2016-11-12	14.1	14.2	14.3	15.1	15.5				90	90	90	90	90	92	92	92
201923	20	0	23	2	2016-04-09	2016-05-09	2016-06-08	2016-07-12	2016-08-10	2016-09-11	2016-10-15	2016-11-12	13.2	12.5	13.6	14.3	15.2	15			90	90	90	90	90	90	92	92
201924	20	0	30	2	2016-04-09	2016-05-09	2016-06-08	2016-07-12	2016-08-10	2016-09-11	2016-10-15	2016-11-12	14.6	14.5	14.6	14.5	15.4	14.5	14.8	14.5	90	90	90	90	90	90	90	90
201925	20	0	48	2	2016-04-09	2016-05-09	2016-06-08	2016-07-12	2016-08-10	2016-09-11	2016-10-15	2016-11-12	13.9	13.3	13.6	13.9	13.5	13.5	13.8	13	90	90	90	90	90	90	90	90
201926	20	0	24	1	2016-04-09	2016-05-09	2016-06-08	2016-07-12	2016-08-10	2016-09-11	2016-10-15	2016-11-12	14.5	13.5	13.4	13.9	14	14.2	14.3	15	90	90	90	90	90	90	90	90
201927	20	0	9	2	2016-04-09	2016-05-09	2016-06-08	2016-07-12	2016-08-10	2016-09-11	2016-10-15	2016-11-12	14	12.5	12.6	12.5	14.2	13.7	14	14.5	90	90	90	90	90	90	90	90
201928	20	0	36	2	2016-04-09	2016-05-09	2016-06-08	2016-07-12	2016-08-10	2016-09-11	2016-10-15	2016-11-12	16.2	14.6	15.2	14.8	14.9	15.6	15.5	15.7	90	90	90	90	90	90	90	90
201929	20	0	56	2	2016-04-09	2016-05-09	2016-06-08	2016-07-12	2016-08-10	2016-09-11	2016-10-15	2016-11-12	16.1	15.5	15.9	14.2	14.2	16	15.7	16	90	90	90	90	90	90	90	90
201930	20	0	46	1	2016-04-09	2016-05-09	2016-06-08	2016-07-12	2016-08-10	2016-09-11	2016-10-15	2016-11-12	17.2	16.5	16.5	17	17.2	15.6	15.9	15.7	90	90	90	90	90	90	90	90
201931	20	0	48	1	2016-04-09	2016-05-09	2016-06-08	2016-07-12	2016-08-10	2016-09-11	2016-10-15	2016-11-12	13.8	13.9	13.7	14	15	14			90	90	90	90	90	90	92	92
201932	20	0	30	2	2016-04-09	2016-05-09	2016-06-08	2016-07-12	2016-08-10	2016-09-11	2016-10-15	2016-11-12	14	13.7	14	14.5	14.8	14.5			90	90	90	90	90	90	92	92
201933	20	0	12	1	2016-04-09	2016-05-09	2016-06-08	2016-07-12	2016-08-10	2016-09-11	2016-10-15	2016-11-12	12.5	12	11.5	12.1	13.5	13			90	90	90	90	90	90	92	92
201934	20	0	42	2	2016-04-09	2016-05-09	2016-06-08	2016-07-12	2016-08-10	2016-09-11	2016-10-15	2016-11-12	14.2		14			14	14.5	15	90	91	90	93	91	90	90	90
201935	20	0	36	1	2016-04-09	2016-05-09	2016-06-08	2016-07-12	2016-08-10	2016-09-11	2016-10-15	2016-11-12	14.9	13.4	13.4	14		14	14.2	14.5	90	90	90	90	91	90	90	90
201936	20	0	9	2	2016-04-09	2016-05-09	2016-06-08	2016-07-12	2016-08-10	2016-09-11	2016-10-15	2016-11-12	12.1	11.7	11.6	12.5		13.4	13.9	14	90	90	90	90	91	90	90	90
201937	20	0	36	1	2016-04-09	2016-05-09	2016-06-08	2016-07-12	2016-08-10	2016-09-11	2016-10-15	2016-11-12	13.4	12.9	13	13.9	13.8				90	90	90	90	90	92	92	92
201938	20	0	25	2	2016-04-09	2016-05-09	2016-06-08	2016-07-12	2016-08-10	2016-09-11	2016-10-15	2016-11-12	14	13.1	13.1	13.5	13.4				90	90	90	90	90	92	92	92
201939	20	0	7	1	2016-04-09	2016-05-09	2016-06-08	2016-07-12	2016-08-10	2016-09-11	2016-10-15	2016-11-12	12.8	12.4	12.5	13.7	14				90	90	90	90	90	92	92	92
201940	20	0	30	1	2016-04-09	2016-05-09	2016-06-08	2016-07-12	2016-08-10	2016-09-11	2016-10-15	2016-11-12	14.4	13.5		14.8	14	13.4	14	14.5	90	90	93	90	90	90	90	90
71941	7	1	8	1	2016-04-09	2016-05-09	2016-06-08	2016-07-12	2016-08-10	2016-09-11	2016-10-15	2016-11-12	15.3	14.6	14.1	15.1	14.6	15.6	14.9	14.1	90	90	90	90	90	90	90	90
71942	7	1	21	1	2016-04-09	2016-05-09	2016-06-08	2016-07-12	2016-08-10	2016-09-11	2016-10-15	2016-11-12	14.1	14.4	14.7	13.9	14.4	14.6	15.1	14.7	90	90	90	90	90	90	90	90
71943	7	1	51	1	2016-04-09	2016-05-09	2016-06-08	2016-07-12	2016-08-10	2016-09-11	2016-10-15	2016-11-12	14.7	14.9	14.4	14.8	15.9	15.2	15.1	15.1	90	90	90	90	90	90	90	90
71944	7	1	31	1	2016-04-09	2016-05-09	2016-06-08	2016-07-12	2016-08-10	2016-09-11	2016-10-15	2016-11-12	15.4	15.5	15.1	15.3	15.9	16.4	16.8	16.4	90	90	90	90	90	90	90	90
71945	7	1	44	2	2016-04-09	2016-05-09	2016-06-08	2016-07-12	2016-08-10	2016-09-11	2016-10-15	2016-11-12	14.9	14.7	14.3	14.8	14.9	15.6	15.3	14.9	90	90	90	90	90	90	90	90
71946	7	1	19	1	2016-04-09	2016-05-09	2016-06-08	2016-07-12	2016-08-10	2016-09-11	2016-10-15	2016-11-12	13.7	12.6	12.2	13	13.6	13.3	13.1	13.7	90	90	90	90	90	90	90	90
71947	7	1	9	2	2016-04-09	2016-05-09	2016-06-08	2016-07-12	2016-08-10	2016-09-11	2016-10-15	2016-11-12	12.7	12.4	13.8	12.6	12.1	12.6	13.1	13.3	90	90	90	90	90	90	90	90
71948	7	1	24	1	2016-04-09	2016-05-09	2016-06-08	2016-07-12	2016-08-10	2016-09-11	2016-10-15	2016-11-12	12.4	12.9	12.6	13.8	13.2	13.3	13.1	13.8	90	90	90	90	90	90	90	90
71949	7	1	23	2	2016-04-09	2016-05-09	2016-06-08	2016-07-12	2016-08-10	2016-09-11	2016-10-15	2016-11-12	15.1	15.6	14.9	15.3	15.5	15.8			90	90	90	90	90	90	93	93
71950	7	1	32	1	2016-04-09	2016-05-09	2016-06-08	2016-07-12	2016-08-10	2016-09-11	2016-10-15	2016-11-12	13.7	13.9	13.2	13.5	14.3	14.5	14.2	14.6	90	90	90	90	90	90	90	90
71951	7	1	6	2	2016-04-09	2016-05-09	2016-06-08	2016-07-12	2016-08-10	2016-09-11	2016-10-15	2016-11-12	11.7	12.7	12.6	13.6	14.2	13.6	13.3	13.7	90	90	90	90	90	90	90	90
71952	7	1	50	1	2016-04-09	2016-05-09	2016-06-08	2016-07-12	2016-08-10	2016-09-11	2016-10-15	2016-11-12	13.3	13.6	13.4	13.8	14.2	14.9	15.3		90	90	90	90	90	90	90	94
71953	7	1	8	2	2016-04-09	2016-05-09	2016-06-08	2016-07-12	2016-08-10	2016-09-11	2016-10-15	2016-11-12	12.4	12.6	13	13.1	14.4	13.1	13.4	13.2	90	90	90	90	90	90	90	90
71954	7	1	32	1	2016-04-09	2016-05-09	2016-06-08	2016-07-12	2016-08-10	2016-09-11	2016-10-15	2016-11-12	14.4	14.2	13.6	13.9	15.4	14.2	14.4	14.6	90	90	90	90	90	90	90	90
71955	7	1	29	2	2016-04-09	2016-05-09	2016-06-08	2016-07-12	2016-08-10	2016-09-11	2016-10-15	2016-11-12	14.7	13.2	14.3	14.5	14.8	14.4	14.2	13.9	90	90	90	90	90	90	90	90
71956	7	1	24	1	2016-04-09	2016-05-09	2016-06-08	2016-07-12	2016-08-10	2016-09-11	2016-10-15	2016-11-12	16.7	16.1	16.4	16.1	16.3	15.9	16.1	15.7	90	90	90	90	90	90	90	90
71957	7	1	50	2	2016-04-09	2016-05-09	2016-06-08	2016-07-12	2016-08-10	2016-09-11	2016-10-15	2016-11-12	14.6	13.9	13.7	14.2	13.9	14.1	14.4	14.7	90	90	90	90	90	90	90	90
141958	14	0	12	1	2016-03-16	2016-04-19	2016-05-21	2016-06-25	2016-07-23	2016-08-21	2016-09-21	2016-10-22	13.2	13.5	14.4	13.4		14.4	13.5	13.2	90	90	90	90	91	90	90	90
161961	16	0	40	2	2016-04-10	2016-05-09	2016-06-11	2016-07-13	2016-08-13	2016-09-17	2016-10-15	2016-11-12	15.3	15.7	16	15	15.1	15.5	16	16.4	90	90	90	90	90	90	90	90
161962	16	0	28	1	2016-04-10	2016-05-09	2016-06-11	2016-07-13	2016-08-13	2016-09-17	2016-10-15	2016-11-12	12.3	12.5	13.4	12.7	13.5	13.8	14.4	14.7	90	90	90	90	90	90	90	90
161963	16	0	8	1	2016-04-10	2016-05-09	2016-06-11	2016-07-13	2016-08-13	2016-09-17	2016-10-15	2016-11-12	10.1	11.6	12.2	11.5	11	11.9	11.7	11.8	90	90	90	90	90	90	90	90
161964	16	0	13	1	2016-04-10	2016-05-09	2016-06-11	2016-07-13	2016-08-13	2016-09-17	2016-10-15	2016-11-12	12.4	12.5	12						90	90	90	91	94	92	92	92
161965	16	0	46	2	2016-04-10	2016-05-09	2016-06-11	2016-07-13	2016-08-13	2016-09-17	2016-10-15	2016-11-12	15	15.2	14.4						90	90	90	91	94	92	92	92
161966	16	0	43	2	2016-04-10	2016-05-09	2016-06-11	2016-07-13	2016-08-13	2016-09-17	2016-10-15	2016-11-12	14.4	15	14.6	14.8	14.2	14.3	14.5	15.5	90	90	90	90	90	90	90	90
161967	16	0	7	1	2016-04-10	2016-05-09	2016-06-11	2016-07-13	2016-08-13	2016-09-17	2016-10-15	2016-11-12	13.7	13.9	14.7	14	14.3	14.4	14	14.6	90	90	90	90	90	90	90	90
161968	16	0	52	2	2016-04-10	2016-05-09	2016-06-11	2016-07-13	2016-08-13	2016-09-17	2016-10-15	2016-11-12	16.5	17	16.1	16	16.7	16.5	16.6	16.5	90	90	90	90	90	90	90	90
161969	16	0	11	2	2016-04-10	2016-05-09	2016-06-11	2016-07-13	2016-08-13	2016-09-17	2016-10-15	2016-11-12	14	14.7	14.5	15	13.5	14.2	14.5	14.7	90	90	90	90	90	90	90	90
161970	16	0	38	1	2016-04-10	2016-05-09	2016-06-11	2016-07-13	2016-08-13	2016-09-17	2016-10-15	2016-11-12	14	14.5	14	13.5	13.3	13.5	14.3	14.9	90	90	90	90	90	90	90	90
161971	16	0	13	2	2016-04-10	2016-05-09	2016-06-11	2016-07-13	2016-08-13	2016-09-17	2016-10-15	2016-11-12	12	12.8	13	12	12	12.2	12.8	13	90	90	90	90	90	90	90	90
161972	16	0	14	2	2016-04-10	2016-05-09	2016-06-11	2016-07-13	2016-08-13	2016-09-17	2016-10-15	2016-11-12	12.3	12.5	13	12.7	12.2	12.3	13	13.2	90	90	90	90	90	90	90	90
161973	16	0	44	2	2016-04-10	2016-05-09	2016-06-11	2016-07-13	2016-08-13	2016-09-17	2016-10-15	2016-11-12	14	14.3	14		14.5				90	90	90	92	90	92	92	92
161974	16	0	14	1	2016-04-10	2016-05-09	2016-06-11	2016-07-13	2016-08-13	2016-09-17	2016-10-15	2016-11-12	13.1	14.5	14.7	13.5	13.4	13.8	14.5	14	90	90	90	90	90	90	90	90
161975	16	0	50	1	2016-04-10	2016-05-09	2016-06-11	2016-07-13	2016-08-13	2016-09-17	2016-10-15	2016-11-12	14	15	14.7	14.4	14.7	15.2	15.3	15	90	90	90	90	90	90	90	90
161976	16	0	37	1	2016-04-10	2016-05-09	2016-06-11	2016-07-13	2016-08-13	2016-09-17	2016-10-15	2016-11-12	12.9	13.5	13.1	13	13.1	13.4	13.6	14.1	90	90	90	90	90	90	90	90
161977	16	0	26	1	2016-04-10	2016-05-09	2016-06-11	2016-07-13	2016-08-13	2016-09-17	2016-10-15	2016-11-12	12.3	13	13.2	12.9	13	13.3	14.2	13.7	90	90	90	90	90	90	90	90
161978	16	0	20	1	2016-04-10	2016-05-09	2016-06-11	2016-07-13	2016-08-13	2016-09-17	2016-10-15	2016-11-12	14	14.1	13.5	14	13.5	14.2	14.5	14.3	90	90	90	90	90	90	90	90
161979	16	0	46	2	2016-04-10	2016-05-09	2016-06-11	2016-07-13	2016-08-13	2016-09-17	2016-10-15	2016-11-12	14.1	14	14.6	14.3	14.4	14.8	14.7	14.6	90	90	90	90	90	90	90	90
161980	16	0	11	2	2016-04-10	2016-05-09	2016-06-11	2016-07-13	2016-08-13	2016-09-17	2016-10-15	2016-11-12	12.9	12.4	12.5	12.6	11.8	12.4	13	12.7	90	90	90	90	90	90	90	90
151981	15	0	48	2	2016-04-10	2016-05-09	2016-06-11	2016-07-13	2016-08-13	2016-09-17	2016-10-15	2016-11-12	14.3	13.8	14.3	14.4	14.7	15	15	14.6	90	90	90	90	90	90	90	90
151982	15	0	24	2	2016-04-10	2016-05-09	2016-06-11	2016-07-13	2016-08-13	2016-09-17	2016-10-15	2016-11-12	14.6	14.7	14.4	14.6	14.5	14.7	15.1	14.5	90	90	90	90	90	90	90	90
151983	15	0	25	1	2016-04-10	2016-05-09	2016-06-11	2016-07-13	2016-08-13	2016-09-17	2016-10-15	2016-11-12	13.8	13.3	13.9	13.2	13	13.5	13.4	13.4	90	90	90	90	90	90	90	90
151984	15	0	41	2	2016-04-10	2016-05-09	2016-06-11	2016-07-13	2016-08-13	2016-09-17	2016-10-15	2016-11-12	14.3	13.9	14.2	14.8	14.7	14.6	14.8	14.5	90	90	90	90	90	90	90	90
151985	15	0	12	2	2016-04-10	2016-05-09	2016-06-11	2016-07-13	2016-08-13	2016-09-17	2016-10-15	2016-11-12	13.9	13.5	13.7	13.5	14.2	14.3	13.8	13.3	90	90	90	90	90	90	90	90
151986	15	0	38	2	2016-04-10	2016-05-09	2016-06-11	2016-07-13	2016-08-13	2016-09-17	2016-10-15	2016-11-12	16.4	16	16.5	16.1	16.6	17	17.3	16.8	90	90	90	90	90	90	90	90
151987	15	0	36	1	2016-04-10	2016-05-09	2016-06-11	2016-07-13	2016-08-13	2016-09-17	2016-10-15	2016-11-12	15	15.7	14.5	15	15.1	14.8	14.5	14.6	90	90	90	90	90	90	90	90
151988	15	0	18	2	2016-04-10	2016-05-09	2016-06-11	2016-07-13	2016-08-13	2016-09-17	2016-10-15	2016-11-12	14	13.7	14.1	14	13.9	14.4	13.9	14	90	90	90	90	90	90	90	90
151989	15	0	54	2	2016-04-10	2016-05-09	2016-06-11	2016-07-13	2016-08-13	2016-09-17	2016-10-15	2016-11-12	14.2	14.4	15	14.8	14.9	15.1	14.7	14.2	90	90	90	90	90	90	90	90
151990	15	0	18	2	2016-04-10	2016-05-09	2016-06-11	2016-07-13	2016-08-13	2016-09-17	2016-10-15	2016-11-12	13.8	13.1	13.5	13.3	14.3	14.3	14.4	14.5	90	90	90	90	90	90	90	90
151991	15	0	23	1	2016-04-10	2016-05-09	2016-06-11	2016-07-13	2016-08-13	2016-09-17	2016-10-15	2016-11-12	13.5	14	14.3	13.7	13.6	14	14	14.5	90	90	90	90	90	90	90	90
151992	15	0	22	2	2016-04-10	2016-05-09	2016-06-11	2016-07-13	2016-08-13	2016-09-17	2016-10-15	2016-11-12	13.3	12.9	13	13.5	13.4	13.3	13.1	14.2	90	90	90	90	90	90	90	90
151993	15	0	6	2	2016-04-10	2016-05-09	2016-06-11	2016-07-13	2016-08-13	2016-09-17	2016-10-15	2016-11-12	12.5	11.9	12	12.1	12.5	13	12.5		90	90	90	90	90	90	90	91
151994	15	0	21	1	2016-04-10	2016-05-09	2016-06-11	2016-07-13	2016-08-13	2016-09-17	2016-10-15	2016-11-12	12.8	12.3	13.2	14	13.1	13.2	13.1		90	90	90	90	90	90	90	91
151995	15	0	30	1	2016-04-10	2016-05-09	2016-06-11	2016-07-13	2016-08-13	2016-09-17	2016-10-15	2016-11-12	13.3	13.4	12.8	13.5	13.8	13.5	13.4	13.5	90	90	90	90	90	90	90	90
151996	15	0	36	1	2016-04-10	2016-05-09	2016-06-11	2016-07-13	2016-08-13	2016-09-17	2016-10-15	2016-11-12	16.4	16.3	16.6	16.4	16.6		16.2	16.9	90	90	90	90	90	93	90	90
151997	15	0	48	1	2016-04-10	2016-05-09	2016-06-11	2016-07-13	2016-08-13	2016-09-17	2016-10-15	2016-11-12	14.5	13.9	14.2	13.9	14.2	14.4	13.5	14	90	90	90	90	90	90	90	90
151998	15	0	24	1	2016-04-10	2016-05-09	2016-06-11	2016-07-13	2016-08-13	2016-09-17	2016-10-15	2016-11-12	13	12.5	14.4	13.6	13.5	13	12.8	13	90	90	90	90	90	90	90	90
151999	15	0	36	1	2016-04-10	2016-05-09	2016-06-11	2016-07-13	2016-08-13	2016-09-17	2016-10-15	2016-11-12	12.9	13	13.2	13	13.4	14.2	13.7	14.8	90	90	90	90	90	90	90	90
152000	15	0	52	1	2016-04-10	2016-05-09	2016-06-11	2016-07-13	2016-08-13	2016-09-17	2016-10-15	2016-11-12	15	15	14.6	14.3	15	15.5	15.2	15.5	90	90	90	90	90	90	90	90
182001	18	0	9	1	2016-04-10	2016-05-09	2016-06-11	2016-07-13	2016-08-13	2016-09-17	2016-10-15	2016-11-12	11.6	12.8	13.4	13.6	14.1	13.8	14	14.9	90	90	90	90	90	90	90	90
[truncated: 610 more rows]

## Sheet: Dictionary
Variable Name	Variable Label	Answer Label	Answer Code	Variable Type
cuid	Child's ID	Open ended		Numeric
cluster	Cluster	Open ended		Numeric
arm	Study Arm			Numeric
		control	0
		intervention	1
agem	Age (months)	Open ended		double
sex	Child's sex			Numeric
		male	1
		female	2
date0	Date-March	Open ended		Integer
date1	Date-April	Open ended		Integer
date2	Date-May	Open ended		Integer
date3	Date-June	Open ended		Integer
date4	Date-July	Open ended		Integer
date5	Date-August	Open ended		Integer
date6	Date-September	Open ended		Integer
date7	Date-October	Open ended		Integer
muac0	MUAC-March	Open ended		Numeric
muac1	MUAC-April	Open ended		Numeric
muac2	MUAC-May	Open ended		Numeric
muac3	MUAC-June	Open ended		Numeric
muac4	MUAC-July	Open ended		Numeric
muac5	MUAC-August	Open ended		Numeric
muac6	MUAC-September	Open ended		Numeric
muac7	MUAC-October	Open ended		Numeric
note0	Notes-March			Numeric
		(W) child present	90
		(A) child absent from house	91
		(M) family migrated away	92
		(S) child sent away	93
		(H) child in hospital	94
		(D) child died	95
		(O) other	96
		(E) oedema	97
note1	Notes-April			Numeric
		(W) child present	90
		(A) child absent from house	91
		(M) family migrated away	92
		(S) child sent away	93
		(H) child in hospital	94
		(D) child died	95
		(O) other	96
		(E) oedema	97
note2	Notes-May			Numeric
		(W) child present	90
		(A) child absent from house	91
		(M) family migrated away	92
		(S) child sent away	93
		(H) child in hospital	94
		(D) child died	95
		(O) other	96
		(E) oedema	97
note3	Notes-June			Numeric
		(W) child present	90
		(A) child absent from house	91
		(M) family migrated away	92
		(S) child sent away	93
		(H) child in hospital	94
		(D) child died	95
		(O) other	96
		(E) oedema	97
note4	Notes-July			Numeric
		(W) child present	90
		(A) child absent from house	91
		(M) family migrated away	92
		(S) child sent away	93
		(H) child in hospital	94
		(D) child died	95
		(O) other	96
		(E) oedema	97
note5	Notes-August			Numeric
		(W) child present	90
		(A) child absent from house	91
		(M) family migrated away	92
		(S) child sent away	93
		(H) child in hospital	94
		(D) child died	95
		(O) other	96
		(E) oedema	97
note6	Notes-September			Numeric
		(W) child present	90
		(A) child absent from house	91
		(M) family migrated away	92
		(S) child sent away	93
		(H) child in hospital	94
		(D) child died	95
		(O) other	96
		(E) oedema	97
note7	Notes-October			Numeric
		(W) child present	90
		(A) child absent from house	91
		(M) family migrated away	92
		(S) child sent away	93
		(H) child in hospital	94
		(D) child died	95
		(O) other	96
		(E) oedema	97
