# Supplementary material for: A cash-based intervention and the risk of acute malnutrition in children aged 6–59 months living in internally displaced persons camps in Mogadishu, Somalia: A non-randomised cluster trial
Source: PLOS journal article supplement (doi:10.1371/journal.pmed.1002684), 2018-10-29
Supplement: S10 (10.1371/journal.pmed.1002684.s010) [file journal.pmed.1002684.s010]

**S7 Table.** Effect of the intervention on time to first episode of acute malnutrition or death. The intervention sample only includes children whose mothers or primary carers were confirmed cash recipients.

| Variable                                                        | Control           | Intervention      | <i>p</i> -Value |
|-----------------------------------------------------------------|-------------------|-------------------|-----------------|
| Sample, <i>n</i>                                                | 1,379             | 465               |                 |
| Child-months observed, <i>n</i>                                 | 5,632             | 2,113             |                 |
| Acute malnutrition by low MUAC cases, <i>n</i>                  | 52                | 16                |                 |
| Oedema cases, <i>n</i>                                          | 0                 | 0                 |                 |
| Death, <i>n</i>                                                 | 11                | 1                 |                 |
| Acute malnutrition incidence rate, cases/100 child-months       | 0.92 (0.53; 1.14) | 0.76 (0.46; 1.24) |                 |
| Mortality rate, deaths/100 child-months                         | 0.20 (0.11; 0.35) | 0.05 (0.01; 0.34) |                 |
| Acute malnutrition incidence hazard ratio                       | Reference         | 0.81 (0.39; 1.73) | 0.6             |
| Adjusted <sup>1</sup> acute malnutrition incidence hazard ratio | Reference         | 0.86 (0.38; 1.98) | 0.7             |
| Mortality hazard ratio                                          | Reference         | 0.25 (0.05; 1.30) | 0.09            |

Acute malnutrition by low MUAC was defined as MUAC <12.5cm and/or oedema. MUAC: Mid-upper arm circumference. Values in parenthesis are 95% CIs.

<sup>1</sup>Adjusted for age (in months) and male sex.
